# Supplementary material for: Glioblastoma TCGA Mesenchymal and IGS 23 Tumors are Identifiable by IHC and have an Immune-phenotype Indicating a Potential Benefit from Immunotherapy
Source: Oxford University Press journal article supplement (doi:10.1158/1078-0432.ccr-20-2171), 2020-09-30
Supplement: 10780432ccr202171-sup-244705_2_supp_6560254_qgk4mp.docx [file 10780432ccr202171-sup-244705_2_supp_6560254_qgk4mp.docx]

**Supplementary Table S1.** **Statistically significant adjusted *P*-values for differential expression of genes in the pairwise comparison of molecular subtypes.** Two of these genes were selected for immunohistochemical analysis for the identification of the mesenchymal subtype.

| **Gene** | **Ensembl ID** | **Classical vs. Mesenchymal** | **Classical vs. Proneural** | **Mesenchymal vs. Proneural** | **Overexpression in Mesenchymal Subtype** |
| --- | --- | --- | --- | --- | --- |
| *SHC1* | ENSG00000160691 | 0.003 | NS | 1.35E-08 | yes |
| *TCIRG1* | ENSG00000110719 | 0.0008 | NS | 1.18E-08 | yes |
| *IDO1* | ENSG00000131203 | 0.0039 | NS | 0.0015 | no |
| *RUNX3* | ENSG00000020633 | 0.0137 | NS | 1.88E-05 | no |
