# Supplementary material for: Glioblastoma TCGA Mesenchymal and IGS 23 Tumors are Identifiable by IHC and have an Immune-phenotype Indicating a Potential Benefit from Immunotherapy
Source: Oxford University Press journal article supplement (doi:10.1158/1078-0432.ccr-20-2171), 2020-09-30
Supplement: 10780432ccr202171-sup-244705_2_supp_data_6560252_qgp4mp.xlsx [file 10780432ccr202171-sup-244705_2_supp_data_6560252_qgp4mp.xlsx]

## Sheet: S1a
GBM DE genes Mesenchymal vs Proneural
	baseMean	log2FoldChange	lfcMLE	lfcSE	stat	pvalue	padj
ENSG00000070882.12,OSBPL3,protein_coding	1767.82	-1.89892	-1.94963	0.184588	-10.2874	8.03385e-25	2.41964e-20
ENSG00000112290.12,WASF1,protein_coding	443.402	1.94236	2.02393	0.217282	8.93935	3.91474e-19	5.89521e-15
ENSG00000105143.12,SLC1A6,protein_coding	40.0592	4.05078	6.59392	0.530545	7.63514	2.25583e-14	2.2647e-10
ENSG00000155330.9,C16orf87,protein_coding	314.48	1.25962	1.28752	0.166433	7.56829	3.78162e-14	2.84737e-10
ENSG00000253958.1,CLDN23,protein_coding	17.2713	-3.16888	-3.77179	0.421804	-7.51267	5.79348e-14	3.48976e-10
ENSG00000127472.10,PLA2G5,protein_coding	130.337	-3.10336	-3.68238	0.415107	-7.47605	7.65892e-14	3.84452e-10
ENSG00000185215.8,TNFAIP2,protein_coding	1113.08	-2.07801	-2.22295	0.281199	-7.38981	1.47043e-13	6.32663e-10
ENSG00000137338.5,PGBD1,protein_coding	316.118	1.11069	1.13235	0.150944	7.3583	1.86263e-13	7.01235e-10
ENSG00000124782.19,RREB1,protein_coding	1393.55	-1.29037	-1.32269	0.175967	-7.33303	2.25013e-13	7.52994e-10
ENSG00000164294.13,GPX8,protein_coding	195.054	-2.37277	-2.60672	0.325535	-7.28883	3.12656e-13	9.41656e-10
ENSG00000086062.12,B4GALT1,protein_coding	481.774	-1.53081	-1.58688	0.214045	-7.15179	8.56507e-13	2.34512e-09
ENSG00000165105.9,RASEF,protein_coding	218.154	-3.31827	-4.37174	0.47806	-6.94112	3.89009e-12	9.76348e-09
ENSG00000145779.7,TNFAIP8,protein_coding	113.022	-1.52645	-1.59083	0.220509	-6.9224	4.44043e-12	1.02874e-08
ENSG00000157873.17,TNFRSF14,protein_coding	490.887	-1.55703	-1.62753	0.226028	-6.88867	5.6317e-12	1.17721e-08
ENSG00000110719.9,TCIRG1,protein_coding	519.347	-1.77057	-1.87018	0.257336	-6.88038	5.96948e-12	1.17721e-08
ENSG00000257267.2,ZNF271P,unitary_pseudogene	1018.86	0.746904	0.753938	0.10866	6.87374	6.25387e-12	1.17721e-08
ENSG00000163539.16,CLASP2,protein_coding	4214.93	1.37812	1.42326	0.200905	6.85957	6.90664e-12	1.22361e-08
ENSG00000160691.18,SHC1,protein_coding	1557.64	-1.84988	-1.96701	0.270558	-6.83728	8.0709e-12	1.35044e-08
ENSG00000145451.12,GLRA3,protein_coding	136.048	3.49911	4.93174	0.515939	6.78202	1.18511e-11	1.82682e-08
ENSG00000077264.14,PAK3,protein_coding	813.428	2.65785	3.08203	0.392092	6.77864	1.21311e-11	1.82682e-08
ENSG00000084628.9,NKAIN1,protein_coding	118.667	2.75835	3.24615	0.40928	6.73952	1.58912e-11	2.2791e-08
ENSG00000011105.11,TSPAN9,protein_coding	456.207	-1.839	-1.95733	0.274017	-6.71124	1.92972e-11	2.64179e-08
ENSG00000244509.3,APOBEC3C,protein_coding	260.416	-1.74815	-1.84971	0.261994	-6.6725	2.51479e-11	3.29306e-08
ENSG00000246100.3,LINC00900,lincRNA	56.5929	-1.79353	-1.91055	0.271011	-6.6179	3.64328e-11	4.57201e-08
ENSG00000102003.10,SYP,protein_coding	489.828	2.03721	2.2239	0.30846	6.60447	3.9894e-11	4.80611e-08
ENSG00000206557.5,TRIM71,protein_coding	132.772	2.62083	3.06732	0.397745	6.58922	4.42128e-11	5.12155e-08
ENSG00000166482.11,MFAP4,protein_coding	218.129	-2.12961	-2.33808	0.324016	-6.57252	4.94693e-11	5.51821e-08
ENSG00000170681.6,MURC,protein_coding	92.9829	2.08897	2.27985	0.318349	6.56189	5.31317e-11	5.71507e-08
ENSG00000138172.10,CALHM2,protein_coding	115.677	-1.61315	-1.6939	0.246451	-6.54552	5.92879e-11	6.15736e-08
ENSG00000168899.4,VAMP5,protein_coding	85.0372	-1.67544	-1.77025	0.257297	-6.51171	7.42993e-11	7.45915e-08
ENSG00000168280.16,KIF5C,protein_coding	3188.63	1.41306	1.47015	0.218989	6.45264	1.09917e-10	1.0679e-07
ENSG00000177409.11,SAMD9L,protein_coding	1913.33	-1.61429	-1.70306	0.250733	-6.43827	1.20841e-10	1.13734e-07
ENSG00000162542.13,TMCO4,protein_coding	130.892	-1.81168	-1.93302	0.282339	-6.41668	1.39282e-10	1.27118e-07
ENSG00000130675.14,MNX1,protein_coding	41.503	3.20571	4.31696	0.500435	6.40584	1.49543e-10	1.32468e-07
ENSG00000008300.14,CELSR3,protein_coding	1461.06	1.79873	1.91823	0.28141	6.39184	1.63906e-10	1.41043e-07
ENSG00000078018.19,MAP2,protein_coding	10629.5	1.49321	1.5616	0.233951	6.38256	1.74157e-10	1.45701e-07
ENSG00000213190.3,MLLT11,protein_coding	1034.22	1.75185	1.8665	0.275621	6.35602	2.07043e-10	1.64498e-07
ENSG00000196411.9,EPHB4,protein_coding	500.902	-1.76169	-1.87974	0.277217	-6.35492	2.08538e-10	1.64498e-07
ENSG00000087077.11,TRIP6,protein_coding	635.511	-1.55973	-1.63648	0.245714	-6.34776	2.18471e-10	1.64498e-07
ENSG00000175322.11,ZNF519,protein_coding	856.384	1.43206	1.49095	0.225504	6.35046	2.14667e-10	1.64498e-07
ENSG00000182511.11,FES,protein_coding	138.627	-1.56274	-1.64297	0.24638	-6.3428	2.25626e-10	1.65741e-07
ENSG00000110446.9,SLC15A3,protein_coding	271.862	-1.57775	-1.66136	0.249409	-6.32595	2.51673e-10	1.80473e-07
ENSG00000260920.2,RP1-228H13.5,sense_overlapping	223.97	1.55348	1.62949	0.245845	6.31894	2.63358e-10	1.84461e-07
ENSG00000025434.18,NR1H3,protein_coding	186.013	-1.33961	-1.39016	0.212627	-6.3003	2.97076e-10	2.03349e-07
ENSG00000163006.11,CCDC138,protein_coding	239.772	1.017	1.03811	0.161703	6.28932	3.18854e-10	2.08766e-07
ENSG00000111252.10,SH2B3,protein_coding	1118.56	-1.28626	-1.32903	0.204457	-6.29112	3.15186e-10	2.08766e-07
ENSG00000186088.15,GSAP,protein_coding	1032.75	-1.64112	-1.74005	0.261368	-6.27897	3.40815e-10	2.18397e-07
ENSG00000112343.10,TRIM38,protein_coding	710.099	-1.71756	-1.83062	0.273832	-6.27233	3.55694e-10	2.23108e-07
ENSG00000139915.18,MDGA2,protein_coding	219.155	2.53293	2.95749	0.40403	6.26917	3.62983e-10	2.23108e-07
ENSG00000158815.10,FGF17,protein_coding	76.3692	2.99336	4.02469	0.478052	6.26159	3.81072e-10	2.29542e-07
ENSG00000158806.13,NPM2,protein_coding	30.7784	2.84286	3.64313	0.454255	6.25828	3.89248e-10	2.2987e-07
ENSG00000197959.13,DNM3,protein_coding	1905.79	1.9517	2.11916	0.312971	6.23604	4.48789e-10	2.5681e-07
ENSG00000126733.20,DACH2,protein_coding	43.4549	3.05305	4.22508	0.489667	6.23495	4.51921e-10	2.5681e-07
ENSG00000182752.9,PAPPA,protein_coding	183.775	-2.68437	-3.27144	0.431293	-6.224	4.84622e-10	2.6064e-07
ENSG00000102699.5,PARP4,protein_coding	1266.25	-0.943798	-0.95967	0.151611	-6.22515	4.81108e-10	2.6064e-07
ENSG00000132000.11,PODNL1,protein_coding	75.9885	-2.90281	-3.72302	0.46612	-6.22761	4.73613e-10	2.6064e-07
ENSG00000130224.14,LRCH2,protein_coding	356.561	1.47849	1.54879	0.238686	6.19429	5.85484e-10	3.09361e-07
ENSG00000115107.19,STEAP3,protein_coding	1041.56	-1.8603	-2.00241	0.301066	-6.17902	6.45e-10	3.33732e-07
ENSG00000162241.12,SLC25A45,protein_coding	170.534	-1.25767	-1.3039	0.203647	-6.17574	6.58537e-10	3.33732e-07
ENSG00000177045.7,SIX5,protein_coding	152.017	-1.76942	-1.89977	0.286582	-6.17423	6.64848e-10	3.33732e-07
ENSG00000258311.5,RP11-644F5.10,protein_coding	234.729	-1.07276	-1.10087	0.17391	-6.16849	6.89434e-10	3.404e-07
ENSG00000100196.10,KDELR3,protein_coding	96.3779	-2.37187	-2.7308	0.384766	-6.16445	7.07294e-10	3.43585e-07
ENSG00000169871.12,TRIM56,protein_coding	3051.86	-1.13201	-1.16576	0.184014	-6.15173	7.66416e-10	3.60671e-07
ENSG00000070018.8,LRP6,protein_coding	3222.01	1.3588	1.41281	0.220826	6.15324	7.59143e-10	3.60671e-07
ENSG00000127920.5,GNG11,protein_coding	213.851	-2.1732	-2.41794	0.353821	-6.14208	8.14461e-10	3.77384e-07
ENSG00000101349.16,PAK7,protein_coding	96.5582	2.94151	3.8503	0.479278	6.13737	8.38967e-10	3.82849e-07
ENSG00000183876.8,ARSI,protein_coding	82.8382	-2.82011	-3.5703	0.460792	-6.12013	9.35014e-10	4.2031e-07
ENSG00000186369.9,LINC00643,lincRNA	189.406	2.78966	3.50609	0.456404	6.11226	9.8231e-10	4.35077e-07
ENSG00000178401.14,DNAJC22,protein_coding	186.939	-1.78852	-1.9287	0.293051	-6.1031	1.04032e-09	4.54092e-07
ENSG00000183960.8,KCNH8,protein_coding	393.719	2.69885	3.33423	0.443601	6.08395	1.17255e-09	5.04498e-07
ENSG00000177096.8,FAM109B,protein_coding	63.2218	-1.74466	-1.87121	0.286902	-6.08104	1.19402e-09	5.065e-07
ENSG00000138439.11,FAM117B,protein_coding	455.848	1.31929	1.36993	0.217586	6.06329	1.33363e-09	5.57865e-07
ENSG00000183496.5,MEX3B,protein_coding	189.859	1.92433	2.09949	0.320026	6.01304	1.8208e-09	7.51217e-07
ENSG00000198715.11,GLMP,protein_coding	233.527	-1.29663	-1.34719	0.215764	-6.00949	1.86104e-09	7.57444e-07
ENSG00000139180.10,NDUFA9,protein_coding	915.497	0.938078	0.957099	0.156386	5.99847	1.99182e-09	7.96216e-07
ENSG00000090382.6,LYZ,protein_coding	280.929	-2.20545	-2.50506	0.367881	-5.99501	2.03473e-09	7.96216e-07
ENSG00000234129.7,RP11-120D5.1,lincRNA	42.8967	1.64298	1.75181	0.274061	5.99494	2.03561e-09	7.96216e-07
ENSG00000160703.15,NLRX1,protein_coding	169.904	-1.13193	-1.16408	0.188971	-5.99	2.09835e-09	7.97588e-07
ENSG00000140464.19,PML,protein_coding	1021.05	-1.11946	-1.1517	0.186937	-5.98844	2.11857e-09	7.97588e-07
ENSG00000101160.13,CTSZ,protein_coding	734.384	-1.88102	-2.04566	0.313984	-5.99081	2.08798e-09	7.97588e-07
ENSG00000139679.15,LPAR6,protein_coding	462.658	-1.22863	-1.26999	0.206407	-5.95248	2.64112e-09	9.82039e-07
ENSG00000109625.18,CPZ,protein_coding	60.1403	-2.70051	-3.44552	0.453839	-5.95037	2.67544e-09	9.82228e-07
ENSG00000147180.16,ZNF711,protein_coding	1151.89	1.24293	1.28711	0.208951	5.94846	2.70685e-09	9.82228e-07
ENSG00000167107.12,ACSF2,protein_coding	142.98	-1.24724	-1.29	0.209907	-5.94185	2.81828e-09	1.01049e-06
ENSG00000168792.4,ABHD15,protein_coding	186.559	-1.33009	-1.38424	0.224407	-5.92716	3.08218e-09	1.09067e-06
ENSG00000141425.17,RPRD1A,protein_coding	1625.5	0.738515	0.748234	0.124634	5.92546	3.11433e-09	1.09067e-06
ENSG00000251349.3,MSANTD3-TMEFF1,protein_coding	201.549	1.88487	2.0598	0.318985	5.90895	3.44289e-09	1.19187e-06
ENSG00000085382.11,HACE1,protein_coding	627.318	0.970618	0.993345	0.164331	5.9065	3.49462e-09	1.19603e-06
ENSG00000106125.14,FAM188B,protein_coding	326.473	-1.40977	-1.47826	0.23887	-5.90181	3.59525e-09	1.21665e-06
ENSG00000010704.18,HFE,protein_coding	149.94	-1.55283	-1.6435	0.263449	-5.89423	3.76424e-09	1.24584e-06
ENSG00000106100.10,NOD1,protein_coding	392.33	-1.31023	-1.36431	0.222263	-5.89494	3.74806e-09	1.24584e-06
ENSG00000153820.12,SPHKAP,protein_coding	122.622	2.89468	3.87604	0.491513	5.88932	3.87788e-09	1.2695e-06
ENSG00000077279.16,DCX,protein_coding	3116.15	2.68462	3.4059	0.456159	5.88528	3.97371e-09	1.28688e-06
ENSG00000105613.9,MAST1,protein_coding	398.017	1.73454	1.86505	0.296538	5.84931	4.93625e-09	1.56852e-06
ENSG00000025708.13,TYMP,protein_coding	415.513	-1.51794	-1.60778	0.259525	-5.84893	4.9475e-09	1.56852e-06
ENSG00000238164.6,RP3-395M20.8,antisense	35.6458	-1.72032	-1.86133	0.294448	-5.84251	5.14216e-09	1.61325e-06
ENSG00000132274.15,TRIM22,protein_coding	1696.92	-1.56607	-1.66236	0.268152	-5.84023	5.21285e-09	1.61856e-06
ENSG00000102900.12,NUP93,protein_coding	610.032	0.941919	0.962121	0.16133	5.83846	5.26857e-09	1.61917e-06
ENSG00000105929.15,ATP6V0A4,protein_coding	11.5232	3.11542	4.80012	0.5348	5.82539	5.69782e-09	1.72502e-06
ENSG00000268654.1,MIMT1,lincRNA	10.3275	2.70038	3.42821	0.463623	5.82452	5.72755e-09	1.72502e-06
ENSG00000233757.6,AC092835.2,protein_coding	197.447	1.10639	1.1382	0.190068	5.82099	5.84987e-09	1.74442e-06
ENSG00000139971.15,C14orf37,protein_coding	766.948	1.32269	1.38144	0.227336	5.81822	5.94768e-09	1.7562e-06
ENSG00000003987.13,MTMR7,protein_coding	109.225	2.76443	3.62016	0.475312	5.81603	6.02603e-09	1.76206e-06
ENSG00000150457.8,LATS2,protein_coding	353.282	-1.27491	-1.32359	0.219316	-5.81313	6.13144e-09	1.77564e-06
ENSG00000180801.12,ARSJ,protein_coding	466.086	-2.18977	-2.48831	0.377393	-5.80236	6.53893e-09	1.86602e-06
ENSG00000110628.13,SLC22A18,protein_coding	110.996	-2.15352	-2.44412	0.371192	-5.80163	6.56742e-09	1.86602e-06
ENSG00000140563.14,MCTP2,protein_coding	103.684	-2.24282	-2.60942	0.387298	-5.79094	6.99939e-09	1.97016e-06
ENSG00000069020.18,MAST4,protein_coding	1162.74	-1.24055	-1.28727	0.214359	-5.78727	7.15394e-09	1.99502e-06
ENSG00000186684.12,CYP27C1,protein_coding	71.5237	2.60968	3.26658	0.452047	5.77301	7.78665e-09	2.15155e-06
ENSG00000234948.1,LINC01524,lincRNA	15.7009	3.16968	5.62949	0.549202	5.77143	7.86037e-09	2.15217e-06
ENSG00000126561.16,STAT5A,protein_coding	224.366	-1.23734	-1.28375	0.214521	-5.7679	8.02678e-09	2.17793e-06
ENSG00000131437.15,KIF3A,protein_coding	1243.31	0.864639	0.880447	0.150248	5.75473	8.67789e-09	2.29644e-06
ENSG00000196954.12,CASP4,protein_coding	381.152	-1.44859	-1.52567	0.251635	-5.7567	8.57737e-09	2.29644e-06
ENSG00000103888.15,CEMIP,protein_coding	652.752	-2.48031	-3.0017	0.431024	-5.75445	8.6923e-09	2.29644e-06
ENSG00000197879.14,MYO1C,protein_coding	848.66	-1.14005	-1.17664	0.198441	-5.74505	9.18938e-09	2.40666e-06
ENSG00000187801.14,ZFP69B,protein_coding	189.527	1.17182	1.20824	0.205036	5.7152	1.09577e-08	2.84504e-06
ENSG00000117632.20,STMN1,protein_coding	2410.28	1.47029	1.55787	0.257882	5.70141	1.18821e-08	3.05868e-06
ENSG00000065361.14,ERBB3,protein_coding	688.687	2.61413	3.37453	0.461498	5.66445	1.47499e-08	3.76473e-06
ENSG00000028839.9,TBPL1,protein_coding	233.544	1.0789	1.11254	0.190524	5.66276	1.48954e-08	3.76992e-06
ENSG00000279667.1,RP11-656D10.7,TEC	25.5452	1.96068	2.17872	0.346528	5.65808	1.53074e-08	3.84189e-06
ENSG00000282851.1,BISPR,lincRNA	132.447	-1.67077	-1.80095	0.296116	-5.64228	1.6781e-08	4.17695e-06
ENSG00000170006.11,TMEM154,protein_coding	314.568	-1.99437	-2.18393	0.354049	-5.63304	1.77063e-08	4.37113e-06
ENSG00000203877.8,RIPPLY2,protein_coding	37.4215	2.64872	3.44279	0.470788	5.62614	1.84285e-08	4.51242e-06
ENSG00000162643.12,WDR63,protein_coding	43.3135	-2.50148	-3.07257	0.445177	-5.61908	1.91976e-08	4.66286e-06
ENSG00000150471.15,ADGRL3,protein_coding	3060.28	1.21245	1.25613	0.21623	5.60724	2.05583e-08	4.95339e-06
ENSG00000091164.12,TXNL1,protein_coding	1078.96	0.756469	0.769254	0.135046	5.60159	2.124e-08	5.07703e-06
ENSG00000173705.8,SUSD5,protein_coding	86.3338	2.3827	2.94174	0.426436	5.58749	2.30382e-08	5.46349e-06
ENSG00000067606.15,PRKCZ,protein_coding	144.191	1.57041	1.6763	0.281145	5.58577	2.32661e-08	5.47443e-06
ENSG00000137693.13,YAP1,protein_coding	1488.77	-1.62464	-1.75221	0.291078	-5.58145	2.38527e-08	5.56284e-06
ENSG00000179954.14,SSC5D,protein_coding	150.133	-1.88891	-2.08976	0.338497	-5.58029	2.40112e-08	5.56284e-06
ENSG00000242173.8,ARHGDIG,protein_coding	54.3842	2.36097	2.90398	0.423574	5.57392	2.49066e-08	5.72623e-06
ENSG00000169495.4,HTRA4,protein_coding	9.6257	-2.644	-3.46653	0.474467	-5.57257	2.51014e-08	5.72729e-06
ENSG00000186648.14,LRRC16B,protein_coding	192.657	1.38447	1.46107	0.248662	5.56768	2.58153e-08	5.84591e-06
ENSG00000175130.6,MARCKSL1,protein_coding	2888.87	1.36924	1.43828	0.246091	5.56397	2.63702e-08	5.92701e-06
ENSG00000216490.3,IFI30,protein_coding	388.253	-1.67828	-1.8156	0.301906	-5.55895	2.71406e-08	6.05498e-06
ENSG00000069399.12,BCL3,protein_coding	224.847	-1.61052	-1.73106	0.289983	-5.55384	2.79457e-08	6.18873e-06
ENSG00000197467.13,COL13A1,protein_coding	101.381	-2.28602	-2.70508	0.41199	-5.54873	2.87759e-08	6.32607e-06
ENSG00000125813.13,PAX1,protein_coding	4.16332	3.08162	6.53797	0.556976	5.53277	3.15218e-08	6.87953e-06
ENSG00000135842.16,FAM129A,protein_coding	1467.37	-1.62233	-1.73301	0.29383	-5.52133	3.3645e-08	7.29007e-06
ENSG00000254726.2,MEX3A,protein_coding	1053.41	1.78759	1.95985	0.324463	5.50939	3.60081e-08	7.74637e-06
ENSG00000134864.10,GGACT,protein_coding	66.3484	-1.78943	-1.95985	0.324907	-5.50751	3.63943e-08	7.77392e-06
ENSG00000106688.11,SLC1A1,protein_coding	243.658	1.79804	2.0006	0.326838	5.50131	3.76983e-08	7.99575e-06
ENSG00000173068.17,BNC2,protein_coding	386.627	-1.71691	-1.86845	0.312367	-5.49645	3.87503e-08	8.16141e-06
ENSG00000278469.1,Metazoa_SRP,misc_RNA	4.94828	-2.73478	-3.77032	0.497988	-5.49165	3.98193e-08	8.32831e-06
ENSG00000204178.9,TMEM57,protein_coding	485.124	0.806418	0.819987	0.146895	5.48975	4.02494e-08	8.36022e-06
ENSG00000196569.11,LAMA2,protein_coding	1586.21	-2.22522	-2.56751	0.405702	-5.48486	4.13792e-08	8.53601e-06
ENSG00000118200.14,CAMSAP2,protein_coding	3091.76	0.826119	0.842852	0.150727	5.4809	4.23175e-08	8.60238e-06
ENSG00000130270.16,ATP8B3,protein_coding	37.5134	-1.81067	-1.99614	0.330414	-5.48	4.25331e-08	8.60238e-06
ENSG00000269416.5,LINC01224,lincRNA	34.8933	2.27987	2.71502	0.416042	5.4799	4.25578e-08	8.60238e-06
ENSG00000134242.15,PTPN22,protein_coding	49.3473	-1.56917	-1.68502	0.286501	-5.47701	4.3257e-08	8.67663e-06
ENSG00000240291.1,RP11-499P20.2,antisense	48.5702	1.63895	1.76974	0.299296	5.47601	4.35012e-08	8.67663e-06
ENSG00000146242.8,TPBG,protein_coding	179.061	-2.62963	-3.40987	0.480443	-5.47335	4.41602e-08	8.75011e-06
ENSG00000279189.1,RP11-861E23.2,TEC	89.9373	2.44522	3.07703	0.446967	5.47069	4.48296e-08	8.79082e-06
ENSG00000130309.10,COLGALT1,protein_coding	1295.61	-0.951145	-0.972562	0.173877	-5.47021	4.49494e-08	8.79082e-06
ENSG00000115112.7,TFCP2L1,protein_coding	552.976	-2.34298	-2.7317	0.428469	-5.46826	4.54467e-08	8.82004e-06
ENSG00000165152.8,TMEM246,protein_coding	167.986	2.21983	2.60312	0.406017	5.46734	4.56845e-08	8.82004e-06
ENSG00000268104.2,SLC6A14,protein_coding	4.03234	2.87646	4.52015	0.526648	5.46183	4.71243e-08	9.04007e-06
ENSG00000165171.10,WBSCR27,protein_coding	22.176	-2.19082	-2.55444	0.401286	-5.45949	4.77492e-08	9.10196e-06
ENSG00000142627.12,EPHA2,protein_coding	270.398	-1.95085	-2.16463	0.357743	-5.4532	4.94707e-08	9.3708e-06
ENSG00000166111.9,SVOP,protein_coding	54.083	2.64126	3.57902	0.484562	5.45081	5.01416e-08	9.4211e-06
ENSG00000181481.13,RNF135,protein_coding	277.506	-1.11582	-1.15551	0.204736	-5.45003	5.03618e-08	9.4211e-06
ENSG00000167216.16,KATNAL2,protein_coding	157.963	-1.12033	-1.1599	0.205612	-5.44874	5.07266e-08	9.43077e-06
ENSG00000104435.13,STMN2,protein_coding	605.253	2.87214	4.35959	0.527492	5.44491	5.18316e-08	9.57708e-06
ENSG00000239713.7,APOBEC3G,protein_coding	141.975	-1.52812	-1.63213	0.280772	-5.44257	5.25166e-08	9.58603e-06
ENSG00000186654.20,PRR5,protein_coding	143.108	-1.43213	-1.51807	0.263123	-5.44283	5.24416e-08	9.58603e-06
ENSG00000137752.22,CASP1,protein_coding	186.822	-1.44836	-1.52875	0.26663	-5.43209	5.56985e-08	1.01056e-05
ENSG00000050628.20,PTGER3,protein_coding	28.9235	2.74934	3.89633	0.506693	5.42604	5.76187e-08	1.03914e-05
ENSG00000135363.11,LMO2,protein_coding	722.056	-1.67926	-1.82252	0.309907	-5.41859	6.00714e-08	1.07692e-05
ENSG00000266094.6,RASSF5,protein_coding	237.54	-1.37784	-1.45406	0.254851	-5.40645	6.4286e-08	1.14404e-05
ENSG00000155066.15,PROM2,protein_coding	151.961	1.57127	1.69241	0.290672	5.40565	6.4575e-08	1.14404e-05
ENSG00000277399.4,GPR179,protein_coding	98.4698	2.12658	2.45526	0.393947	5.39814	6.73362e-08	1.18598e-05
ENSG00000151743.10,AMN1,protein_coding	154.223	1.1566	1.20211	0.214343	5.39601	6.81383e-08	1.19313e-05
ENSG00000101311.15,FERMT1,protein_coding	487.408	2.27522	2.71748	0.422021	5.39126	6.99644e-08	1.21803e-05
ENSG00000175040.5,CHST2,protein_coding	703.275	-1.63713	-1.77111	0.303823	-5.38844	7.10731e-08	1.22453e-05
ENSG00000026652.13,AGPAT4,protein_coding	1433.44	1.11196	1.15068	0.206367	5.38824	7.1151e-08	1.22453e-05
ENSG00000104643.9,MTMR9,protein_coding	1159.36	0.731909	0.743256	0.136	5.38167	7.3796e-08	1.26283e-05
ENSG00000011028.13,MRC2,protein_coding	2247.38	-1.69517	-1.84889	0.315069	-5.3803	7.43605e-08	1.2653e-05
ENSG00000198113.2,TOR4A,protein_coding	112.87	-1.25237	-1.30783	0.232844	-5.37858	7.5077e-08	1.27032e-05
ENSG00000255031.5,RP11-802E16.3,antisense	37.8215	-2.00929	-2.32425	0.373984	-5.37267	7.7579e-08	1.30532e-05
ENSG00000131446.16,MGAT1,protein_coding	1099.17	-0.854065	-0.871243	0.159218	-5.36412	8.13444e-08	1.35355e-05
ENSG00000103056.11,SMPD3,protein_coding	187.093	2.2371	2.66057	0.417019	5.36452	8.11663e-08	1.35355e-05
ENSG00000008283.15,CYB561,protein_coding	250.001	-1.24949	-1.30591	0.233242	-5.35706	8.4586e-08	1.39976e-05
ENSG00000154548.8,SRSF12,protein_coding	201.294	1.3093	1.37388	0.244772	5.34906	8.84132e-08	1.4551e-05
ENSG00000168594.15,ADAM29,protein_coding	5.81359	2.79226	3.85096	0.522697	5.34202	9.19189e-08	1.50457e-05
ENSG00000197123.9,ZNF679,protein_coding	5.67253	3.00257	6.28314	0.562437	5.3385	9.37168e-08	1.52571e-05
ENSG00000116815.15,CD58,protein_coding	168.765	-1.05623	-1.08685	0.197955	-5.33569	9.51797e-08	1.5412e-05
ENSG00000198720.12,ANKRD13B,protein_coding	374.35	1.17972	1.22606	0.221205	5.33315	9.65256e-08	1.55463e-05
ENSG00000015592.16,STMN4,protein_coding	278.617	2.21597	2.62733	0.415888	5.32829	9.91418e-08	1.58827e-05
ENSG00000149970.14,CNKSR2,protein_coding	675.803	1.25035	1.31786	0.234726	5.32685	9.99309e-08	1.59244e-05
ENSG00000247199.3,RP11-373N22.3,antisense	47.5173	1.77455	1.96687	0.333195	5.32587	1.00473e-07	1.59266e-05
ENSG00000050767.15,COL23A1,protein_coding	285.528	-2.57166	-2.93521	0.48344	-5.31949	1.04057e-07	1.64083e-05
ENSG00000175161.13,CADM2,protein_coding	2381.88	2.38194	2.99071	0.448614	5.30956	1.09889e-07	1.68477e-05
ENSG00000124766.5,SOX4,protein_coding	3302.45	1.90118	2.14101	0.357876	5.3124	1.08193e-07	1.68477e-05
ENSG00000172733.11,PURG,protein_coding	326.032	1.30257	1.36962	0.245266	5.31084	1.09119e-07	1.68477e-05
ENSG00000139083.10,ETV6,protein_coding	1091.12	-0.69295	-0.702081	0.130435	-5.31262	1.08059e-07	1.68477e-05
ENSG00000237172.3,B3GNT9,protein_coding	268.55	-1.03441	-1.06473	0.194839	-5.30905	1.102e-07	1.68477e-05
ENSG00000127666.9,TICAM1,protein_coding	141.564	-1.18708	-1.23622	0.223532	-5.31057	1.09284e-07	1.68477e-05
ENSG00000005243.9,COPZ2,protein_coding	132.251	-1.73632	-1.90225	0.327218	-5.3063	1.11874e-07	1.70172e-05
ENSG00000188322.4,SBK1,protein_coding	513.933	1.58734	1.70398	0.299317	5.30321	1.13787e-07	1.72213e-05
ENSG00000102924.11,CBLN1,protein_coding	17.2706	2.97735	6.40728	0.561554	5.30198	1.14554e-07	1.72508e-05
ENSG00000171316.11,CHD7,protein_coding	4899.89	1.40843	1.49271	0.2658	5.29885	1.16535e-07	1.74616e-05
ENSG00000136881.11,BAAT,protein_coding	11.6016	2.27622	2.78368	0.429739	5.29676	1.17878e-07	1.75756e-05
ENSG00000163513.17,TGFBR2,protein_coding	1007.88	-1.406	-1.49159	0.265946	-5.28677	1.24492e-07	1.84702e-05
ENSG00000263753.6,LINC00667,lincRNA	1125.98	0.849481	0.866096	0.160823	5.28208	1.27726e-07	1.86741e-05
ENSG00000167232.13,ZNF91,protein_coding	4733.4	1.01567	1.04654	0.192248	5.2831	1.27013e-07	1.86741e-05
ENSG00000182472.8,CAPN12,protein_coding	14.4469	-2.45206	-3.13564	0.46416	-5.2828	1.27225e-07	1.86741e-05
ENSG00000020633.18,RUNX3,protein_coding	84.458	-1.29767	-1.3653	0.245815	-5.27905	1.29854e-07	1.88484e-05
ENSG00000174456.13,C12orf76,protein_coding	385.403	0.70972	0.719161	0.134452	5.27861	1.3017e-07	1.88484e-05
ENSG00000245688.1,CTB-26E19.1,sense_intronic	37.2318	-2.82593	-4.13545	0.535472	-5.27746	1.30986e-07	1.88758e-05
ENSG00000171812.11,COL8A2,protein_coding	183.487	-1.73023	-1.89584	0.328215	-5.27164	1.3521e-07	1.93917e-05
ENSG00000144136.10,SLC20A1,protein_coding	1871.46	-1.35262	-1.43103	0.25665	-5.27029	1.36207e-07	1.94421e-05
ENSG00000164061.4,BSN,protein_coding	1467.08	1.44019	1.53161	0.273648	5.26294	1.41772e-07	2.0052e-05
ENSG00000167654.17,ATCAY,protein_coding	1007.97	2.26422	2.71854	0.430223	5.26289	1.41812e-07	2.0052e-05
ENSG00000264885.1,RP11-815I9.4,sense_intronic	132.155	1.43791	1.53197	0.273383	5.2597	1.44288e-07	2.03069e-05
ENSG00000153253.15,SCN3A,protein_coding	1868.62	1.95966	2.22685	0.372902	5.25517	1.4789e-07	2.0717e-05
ENSG00000196591.11,HDAC2,protein_coding	1079.6	1.02976	1.06372	0.196257	5.247	1.546e-07	2.14418e-05
ENSG00000013725.14,CD6,protein_coding	23.5498	-2.20047	-2.63105	0.419502	-5.24544	1.55912e-07	2.14418e-05
ENSG00000173156.6,RHOD,protein_coding	17.6699	-2.8152	-4.06779	0.536642	-5.24596	1.55474e-07	2.14418e-05
ENSG00000157734.13,SNX22,protein_coding	654.396	2.33527	2.8753	0.44519	5.24556	1.55811e-07	2.14418e-05
ENSG00000257185.1,RP11-626P14.2,lincRNA	8.30301	2.571	3.52503	0.490303	5.2437	1.57385e-07	2.1546e-05
ENSG00000178202.12,KDELC2,protein_coding	744.624	-1.24679	-1.30132	0.237876	-5.24136	1.59396e-07	2.17225e-05
ENSG00000143147.14,GPR161,protein_coding	808.804	1.13697	1.18174	0.217052	5.23822	1.62129e-07	2.19954e-05
ENSG00000256197.1,TSPAN9-IT1,sense_intronic	7.86086	-2.24864	-2.73573	0.429793	-5.23191	1.67766e-07	2.26523e-05
ENSG00000198910.12,L1CAM,protein_coding	450.039	2.30861	2.78881	0.441321	5.23113	1.68475e-07	2.26523e-05
ENSG00000126391.13,FRMD8,protein_coding	537.047	-1.09219	-1.13076	0.208996	-5.22588	1.73329e-07	2.32014e-05
ENSG00000112339.14,HBS1L,protein_coding	1082.1	0.832068	0.850934	0.159416	5.21948	1.79425e-07	2.3823e-05
ENSG00000183542.5,KLRC4,protein_coding	34.7617	2.73048	3.76389	0.523145	5.21935	1.79554e-07	2.3823e-05
ENSG00000154928.16,EPHB1,protein_coding	534.341	2.15045	2.53342	0.412214	5.21683	1.82008e-07	2.40427e-05
ENSG00000261478.1,RP11-429B14.4,lincRNA	213.298	1.97122	2.25895	0.378086	5.21367	1.85136e-07	2.43491e-05
ENSG00000243915.1,PRKRIRP2,processed_pseudogene	84.781	2.31412	2.84247	0.444009	5.21188	1.86935e-07	2.44788e-05
ENSG00000159409.14,CELF3,protein_coding	264.238	2.32671	2.89134	0.446639	5.20937	1.89484e-07	2.47051e-05
ENSG00000198959.11,TGM2,protein_coding	441.915	-1.5833	-1.71705	0.304853	-5.19365	2.06212e-07	2.67702e-05
ENSG00000148848.14,ADAM12,protein_coding	1113.68	-1.53296	-1.65837	0.29528	-5.19154	2.08565e-07	2.69595e-05
ENSG00000173611.17,SCAI,protein_coding	939.498	1.02809	1.06155	0.19824	5.18608	2.14762e-07	2.76419e-05
ENSG00000172995.16,ARPP21,protein_coding	351.387	2.1276	2.52514	0.41087	5.17828	2.23936e-07	2.85784e-05
ENSG00000164733.20,CTSB,protein_coding	6565.58	-1.18665	-1.23753	0.22914	-5.17872	2.23418e-07	2.85784e-05
ENSG00000196632.10,WNK3,protein_coding	1112.79	1.13671	1.18325	0.219751	5.17271	2.30725e-07	2.93205e-05
ENSG00000152455.15,SUV39H2,protein_coding	197.399	1.29373	1.36565	0.250179	5.1712	2.32591e-07	2.94335e-05
ENSG00000101194.17,SLC17A9,protein_coding	82.3813	-1.3327	-1.40789	0.257793	-5.16964	2.34549e-07	2.95571e-05
ENSG00000188641.12,DPYD,protein_coding	1220.46	-1.51165	-1.62407	0.29264	-5.16554	2.39749e-07	2.98379e-05
ENSG00000278937.1,RP11-139H14.5,TEC	77.5395	1.97733	2.28364	0.382752	5.16607	2.39066e-07	2.98379e-05
ENSG00000188021.8,UBQLN2,protein_coding	785.658	0.625952	0.63338	0.121161	5.16629	2.38787e-07	2.98379e-05
ENSG00000000971.15,CFH,protein_coding	554.834	-2.09247	-2.4586	0.406108	-5.1525	2.57033e-07	3.18573e-05
ENSG00000149115.13,TNKS1BP1,protein_coding	2071.13	-0.993094	-1.02283	0.192904	-5.14813	2.6309e-07	3.23418e-05
ENSG00000166888.10,STAT6,protein_coding	629.652	-1.40729	-1.49834	0.273351	-5.14829	2.62869e-07	3.23418e-05
ENSG00000113504.20,SLC12A7,protein_coding	463.698	-1.31866	-1.39208	0.256513	-5.14073	2.7368e-07	3.35068e-05
ENSG00000105649.9,RAB3A,protein_coding	93.4949	1.66809	1.82608	0.324571	5.13939	2.75636e-07	3.36097e-05
ENSG00000168405.14,CMAHP,unitary_pseudogene	112.697	-1.71361	-1.89966	0.333577	-5.13707	2.79051e-07	3.3889e-05
ENSG00000101752.11,MIB1,protein_coding	2490.08	0.733806	0.745934	0.143108	5.12763	2.93407e-07	3.54893e-05
ENSG00000177706.8,FAM20C,protein_coding	2294.86	-1.33268	-1.40813	0.260202	-5.12174	3.02737e-07	3.62043e-05
ENSG00000123427.15,METTL21B,protein_coding	1715.52	2.35818	2.77991	0.46034	5.12269	3.01201e-07	3.62043e-05
ENSG00000171940.13,ZNF217,protein_coding	993.389	-1.20284	-1.2605	0.234855	-5.12162	3.02924e-07	3.62043e-05
ENSG00000134853.11,PDGFRA,protein_coding	5419.34	2.30583	2.95392	0.450296	5.1207	3.04398e-07	3.62366e-05
ENSG00000157064.10,NMNAT2,protein_coding	442.335	2.11836	2.51503	0.413857	5.11859	3.07829e-07	3.63639e-05
ENSG00000135679.21,MDM2,protein_coding	5901.96	-1.63547	-1.78746	0.319517	-5.11856	3.07882e-07	3.63639e-05
ENSG00000278192.1,RP5-1056H1.2,lincRNA	106.49	2.28851	2.82855	0.447257	5.11675	3.10843e-07	3.65702e-05
ENSG00000175463.11,TBC1D10C,protein_coding	34.8128	-1.58945	-1.72971	0.310882	-5.11272	3.1755e-07	3.72139e-05
ENSG00000057657.14,PRDM1,protein_coding	356.903	-1.24992	-1.3126	0.244963	-5.10249	3.35208e-07	3.9131e-05
ENSG00000076555.15,ACACB,protein_coding	695.219	-1.10936	-1.15532	0.217479	-5.101	3.37856e-07	3.92878e-05
ENSG00000143554.13,SLC27A3,protein_coding	376.525	-1.33347	-1.3981	0.261512	-5.09908	3.41316e-07	3.93861e-05
ENSG00000139973.15,SYT16,protein_coding	689.221	1.90428	2.15728	0.373412	5.09967	3.40246e-07	3.93861e-05
ENSG00000178814.15,OPLAH,protein_coding	181.972	-1.78843	-1.99432	0.350846	-5.09747	3.44221e-07	3.95696e-05
ENSG00000167613.15,LAIR1,protein_coding	480.892	-1.35303	-1.43618	0.265509	-5.09598	3.46948e-07	3.97315e-05
ENSG00000104870.12,FCGRT,protein_coding	1098.22	-1.04453	-1.07987	0.205243	-5.08923	3.59516e-07	4.10148e-05
ENSG00000176887.6,SOX11,protein_coding	4179.82	2.10467	2.53652	0.413904	5.08492	3.67776e-07	4.17927e-05
ENSG00000151150.20,ANK3,protein_coding	1150.64	1.75728	1.95961	0.345697	5.0833	3.70942e-07	4.17927e-05
ENSG00000067182.7,TNFRSF1A,protein_coding	1072.45	-1.10146	-1.14239	0.216703	-5.08281	3.71885e-07	4.17927e-05
ENSG00000111058.7,ACSS3,protein_coding	1492.69	-1.78897	-1.97865	0.351913	-5.08354	3.7046e-07	4.17927e-05
ENSG00000162894.11,FCMR,protein_coding	17.7152	-1.94648	-2.24556	0.383779	-5.07189	3.93874e-07	4.37714e-05
ENSG00000065600.12,TMEM206,protein_coding	214.485	1.14556	1.19797	0.225925	5.07052	3.96728e-07	4.37714e-05
ENSG00000007402.11,CACNA2D2,protein_coding	53.6258	1.64413	1.79041	0.324159	5.07199	3.93679e-07	4.37714e-05
ENSG00000112159.11,MDN1,protein_coding	3144.05	0.697012	0.708022	0.137411	5.07245	3.92728e-07	4.37714e-05
ENSG00000106236.3,NPTX2,protein_coding	755.411	-2.54546	-2.66095	0.502013	-5.07051	3.96759e-07	4.37714e-05
ENSG00000177511.5,ST8SIA3,protein_coding	517.952	2.65656	4.23501	0.524408	5.06582	4.06644e-07	4.46982e-05
ENSG00000205730.6,ITPRIPL2,protein_coding	1280.81	-0.953673	-0.981008	0.188529	-5.05849	4.22584e-07	4.62814e-05
ENSG00000133048.12,CHI3L1,protein_coding	16384.8	-2.23193	-2.73079	0.442124	-5.04821	4.45973e-07	4.8666e-05
ENSG00000170091.10,HMP19,protein_coding	319.006	2.36531	3.04757	0.468738	5.04612	4.50865e-07	4.90222e-05
ENSG00000125637.15,PSD4,protein_coding	325.481	-1.38548	-1.4729	0.274647	-5.0446	4.54468e-07	4.92362e-05
ENSG00000175544.13,CABP4,protein_coding	88.5383	-1.66601	-1.83997	0.330511	-5.0407	4.63825e-07	5.00698e-05
ENSG00000121988.17,ZRANB3,protein_coding	293.621	0.755831	0.769402	0.150172	5.0331	4.82604e-07	5.1911e-05
ENSG00000073331.17,ALPK1,protein_coding	577.426	-1.59161	-1.73728	0.316585	-5.02745	4.9705e-07	5.32745e-05
ENSG00000124762.13,CDKN1A,protein_coding	1177.72	-1.53553	-1.66068	0.305548	-5.0255	5.02119e-07	5.34774e-05
ENSG00000061337.15,LZTS1,protein_coding	1335.16	-1.82246	-2.04172	0.362701	-5.02468	5.04269e-07	5.34774e-05
ENSG00000204291.10,COL15A1,protein_coding	179.4	-2.09871	-2.4868	0.417651	-5.02502	5.03381e-07	5.34774e-05
ENSG00000261839.1,RP1-265C24.8,lincRNA	67.547	1.87345	2.14237	0.372989	5.0228	5.09224e-07	5.38134e-05
ENSG00000173706.12,HEG1,protein_coding	2190.46	-0.919037	-0.942712	0.183072	-5.02009	5.16463e-07	5.43875e-05
ENSG00000100647.7,SUSD6,protein_coding	1491.98	-0.886396	-0.90814	0.176674	-5.01714	5.24457e-07	5.5037e-05
ENSG00000260118.1,RP6-201G10.2,lincRNA	58.5843	1.69823	1.87899	0.3387	5.01397	5.33191e-07	5.57592e-05
ENSG00000168685.14,IL7R,protein_coding	128.143	-1.94552	-2.24761	0.388118	-5.01269	5.36755e-07	5.59377e-05
ENSG00000166164.15,BRD7,protein_coding	1268.77	0.72492	0.737275	0.144639	5.01193	5.38856e-07	5.5963e-05
ENSG00000170439.6,METTL7B,protein_coding	686.017	-2.03214	-2.36993	0.405613	-5.01003	5.44211e-07	5.6325e-05
ENSG00000006534.15,ALDH3B1,protein_coding	172.355	-1.21231	-1.2742	0.242041	-5.00871	5.47973e-07	5.64636e-05
ENSG00000010295.19,IFFO1,protein_coding	832.793	-0.879673	-0.90201	0.175653	-5.00802	5.49938e-07	5.64636e-05
ENSG00000111012.9,CYP27B1,protein_coding	411.571	2.38067	2.95618	0.475413	5.00758	5.51175e-07	5.64636e-05
ENSG00000134030.13,CTIF,protein_coding	953.441	0.924683	0.948546	0.184681	5.00691	5.53096e-07	5.64683e-05
ENSG00000178171.10,AMER3,protein_coding	80.7754	2.78306	5.46258	0.556167	5.004	5.6153e-07	5.71357e-05
ENSG00000176788.8,BASP1,protein_coding	573.623	1.8395	2.06949	0.367745	5.00212	5.67047e-07	5.75027e-05
ENSG00000175395.15,ZNF25,protein_coding	679.642	1.14857	1.19988	0.22966	5.00119	5.69774e-07	5.75854e-05
ENSG00000106066.13,CPVL,protein_coding	217.034	-1.68137	-1.85306	0.336496	-4.99672	5.8315e-07	5.87401e-05
ENSG00000215196.4,AC091878.1,antisense	11.3246	2.55435	3.57968	0.511323	4.99556	5.86652e-07	5.8896e-05
ENSG00000204520.12,MICA,protein_coding	88.4867	-1.6522	-1.81662	0.330854	-4.99375	5.92189e-07	5.92543e-05
ENSG00000163874.8,ZC3H12A,protein_coding	103.414	-1.20624	-1.26881	0.241668	-4.9913	5.99749e-07	5.9812e-05
ENSG00000197885.10,NKIRAS1,protein_coding	273.766	0.790529	0.806703	0.158512	4.9872	6.126e-07	6.03553e-05
ENSG00000169692.12,AGPAT2,protein_coding	88.1762	-1.5907	-1.72818	0.318968	-4.98701	6.13212e-07	6.03553e-05
ENSG00000156381.8,ANKRD9,protein_coding	310.214	-1.32293	-1.40606	0.265257	-4.98735	6.12126e-07	6.03553e-05
ENSG00000177989.13,ODF3B,protein_coding	96.2685	-1.62937	-1.78909	0.32664	-4.98827	6.09236e-07	6.03553e-05
ENSG00000065609.14,SNAP91,protein_coding	247.25	2.62786	4.04382	0.527734	4.97953	6.37403e-07	6.25319e-05
ENSG00000005156.11,LIG3,protein_coding	1245.79	0.823395	0.841931	0.165378	4.97887	6.39552e-07	6.25391e-05
ENSG00000168116.13,KIAA1586,protein_coding	393.906	0.950057	0.979971	0.190904	4.97663	6.47013e-07	6.26583e-05
ENSG00000110693.15,SOX6,protein_coding	3654.1	1.29402	1.36805	0.26001	4.97682	6.46365e-07	6.26583e-05
ENSG00000278390.4,RP11-74J13.8,antisense	26.8796	1.82356	2.09312	0.366396	4.97702	6.45701e-07	6.26583e-05
ENSG00000197256.10,KANK2,protein_coding	1278.37	-1.15356	-1.20089	0.231854	-4.97538	6.51197e-07	6.28614e-05
ENSG00000005469.11,CROT,protein_coding	544.088	-1.14003	-1.19169	0.229193	-4.97411	6.55487e-07	6.30734e-05
ENSG00000176927.14,EFCAB5,protein_coding	27.1242	2.09198	2.49411	0.420667	4.973	6.59255e-07	6.32338e-05
ENSG00000276768.1,RP5-1116H23.5,lincRNA	12.9826	2.44144	3.55544	0.491008	4.9723	6.6163e-07	6.32602e-05
ENSG00000150627.15,WDR17,protein_coding	613.038	0.972468	1.00131	0.195666	4.97003	6.69427e-07	6.38032e-05
ENSG00000165288.10,BRWD3,protein_coding	1675.12	0.872913	0.894252	0.175674	4.96893	6.73234e-07	6.39636e-05
ENSG00000180998.11,GPR137C,protein_coding	396.447	1.14085	1.18733	0.229683	4.96708	6.79677e-07	6.43726e-05
ENSG00000130429.12,ARPC1B,protein_coding	403.874	-1.46426	-1.57203	0.294965	-4.96419	6.89871e-07	6.51333e-05
ENSG00000174059.16,CD34,protein_coding	423.877	-1.51589	-1.6436	0.30548	-4.96231	6.96581e-07	6.55613e-05
ENSG00000140564.10,FURIN,protein_coding	683.728	-1.03309	-1.06903	0.208284	-4.95998	7.0499e-07	6.61461e-05
ENSG00000119681.11,LTBP2,protein_coding	752.052	-1.90771	-2.19632	0.384723	-4.95867	7.09766e-07	6.63873e-05
ENSG00000077097.13,TOP2B,protein_coding	3458.12	0.965633	0.997227	0.194892	4.95471	7.24364e-07	6.75431e-05
ENSG00000142694.6,EVA1B,protein_coding	55.5886	-1.58676	-1.73436	0.320444	-4.95174	7.3552e-07	6.83716e-05
ENSG00000248429.5,RP11-597D13.9,antisense	116.834	-1.90375	-2.18864	0.384588	-4.95011	7.41733e-07	6.86425e-05
ENSG00000166845.13,C18orf54,protein_coding	390.311	0.99703	1.03158	0.201429	4.94978	7.42993e-07	6.86425e-05
ENSG00000231609.5,AC009501.4,antisense	37.4789	-2.46179	-3.48833	0.497605	-4.94728	7.52562e-07	6.93139e-05
ENSG00000121964.14,GTDC1,protein_coding	766.405	0.701228	0.712276	0.141805	4.94501	7.61396e-07	6.99138e-05
ENSG00000170909.13,OSCAR,protein_coding	49.0207	-1.52281	-1.65456	0.308058	-4.94325	7.68297e-07	7.0333e-05
ENSG00000006638.11,TBXA2R,protein_coding	44.0767	-1.57369	-1.71827	0.318838	-4.93571	7.9859e-07	7.28846e-05
ENSG00000150477.14,KIAA1328,protein_coding	621.403	1.00687	1.041	0.204133	4.93242	8.12165e-07	7.38494e-05
ENSG00000237440.8,ZNF737,protein_coding	476.058	1.02854	1.06529	0.208546	4.93197	8.14065e-07	7.38494e-05
ENSG00000114739.13,ACVR2B,protein_coding	1212.39	1.24308	1.31098	0.252124	4.93042	8.20523e-07	7.42118e-05
ENSG00000165071.14,TMEM71,protein_coding	75.396	-1.69533	-1.86426	0.344283	-4.92423	8.46913e-07	7.63692e-05
ENSG00000160219.11,GAB3,protein_coding	270.381	-1.23751	-1.29301	0.251389	-4.92269	8.53626e-07	7.67448e-05
ENSG00000173320.9,STOX2,protein_coding	1061.26	0.926334	0.949588	0.18823	4.92128	8.59779e-07	7.7068e-05
ENSG00000182795.12,C1orf116,protein_coding	12.8379	1.75927	1.97689	0.357532	4.92059	8.62826e-07	7.71115e-05
ENSG00000164056.10,SPRY1,protein_coding	1078.65	-1.55019	-1.6841	0.315158	-4.91876	8.70928e-07	7.73764e-05
ENSG00000089472.16,HEPH,protein_coding	366.302	-1.87834	-2.14906	0.381839	-4.91919	8.69028e-07	7.73764e-05
ENSG00000213654.9,GPSM3,protein_coding	132.681	-1.07503	-1.1183	0.218717	-4.91516	8.87106e-07	7.85819e-05
ENSG00000064012.21,CASP8,protein_coding	177.828	-1.24007	-1.30771	0.252585	-4.90952	9.12973e-07	8.04003e-05
ENSG00000104381.12,GDAP1,protein_coding	1030.59	1.17396	1.23237	0.239111	4.90968	9.12239e-07	8.04003e-05
ENSG00000136828.18,RALGPS1,protein_coding	791.832	1.18007	1.23715	0.240683	4.90298	9.4394e-07	8.26441e-05
ENSG00000183935.5,HTR7P1,transcribed_processed_pseudogene	80.019	-1.17904	-1.2367	0.240457	-4.90334	9.42183e-07	8.26441e-05
ENSG00000144579.7,CTDSP1,protein_coding	999.484	-0.864057	-0.886668	0.176472	-4.89627	9.7673e-07	8.52671e-05
ENSG00000148798.9,INA,protein_coding	226.6	2.65232	4.29233	0.541821	4.89519	9.82097e-07	8.54879e-05
ENSG00000104833.10,TUBB4A,protein_coding	936.495	2.32195	3.07197	0.474472	4.89375	9.89316e-07	8.5868e-05
ENSG00000150977.10,RILPL2,protein_coding	171.692	-1.06842	-1.11003	0.218384	-4.89236	9.96336e-07	8.62289e-05
ENSG00000163939.18,PBRM1,protein_coding	2211.16	0.652861	0.662514	0.133582	4.88734	1.02208e-06	8.82031e-05
ENSG00000074370.17,ATP2A3,protein_coding	65.681	-1.59152	-1.75139	0.325727	-4.88606	1.02876e-06	8.85259e-05
ENSG00000061273.17,HDAC7,protein_coding	1296.93	-1.01472	-1.05034	0.207734	-4.88473	1.03572e-06	8.8871e-05
ENSG00000184584.12,TMEM173,protein_coding	182.602	-1.30486	-1.38628	0.267333	-4.88104	1.05528e-06	8.97658e-05
ENSG00000254896.1,OPCML-IT1,sense_intronic	54.9275	2.16697	2.694	0.443959	4.88101	1.05544e-06	8.97658e-05
ENSG00000214903.4,RPS15AP3,processed_pseudogene	8.13755	2.53072	3.63824	0.518534	4.88052	1.05807e-06	8.97658e-05
ENSG00000119699.7,TGFB3,protein_coding	445.978	-1.29655	-1.37641	0.26558	-4.88197	1.05031e-06	8.97658e-05
ENSG00000274211.4,SOCS7,protein_coding	1118.56	0.701072	0.712615	0.14375	4.87702	1.07701e-06	9.11161e-05
ENSG00000167771.5,RCOR2,protein_coding	209.361	1.67781	1.84804	0.344083	4.87619	1.08153e-06	9.12423e-05
ENSG00000127252.5,HRASLS,protein_coding	59.063	1.94932	2.27691	0.399821	4.87549	1.08538e-06	9.12649e-05
ENSG00000126458.3,RRAS,protein_coding	84.098	-1.40106	-1.49877	0.287395	-4.87504	1.08786e-06	9.12649e-05
ENSG00000249931.4,GOLGA8K,protein_coding	30.1469	-2.13645	-2.60706	0.438711	-4.86983	1.11693e-06	9.34438e-05
ENSG00000119878.5,CRIPT,protein_coding	385.292	0.982452	1.01786	0.201801	4.86842	1.12495e-06	9.35169e-05
ENSG00000237807.3,RP11-400K9.4,lincRNA	86.9726	-1.97361	-2.3138	0.405429	-4.86796	1.12759e-06	9.35169e-05
ENSG00000134574.11,DDB2,protein_coding	484.545	-1.41512	-1.52213	0.29067	-4.86847	1.12467e-06	9.35169e-05
ENSG00000135116.9,HRK,protein_coding	130.628	1.96092	2.30187	0.40286	4.86749	1.13023e-06	9.35169e-05
ENSG00000110108.9,TMEM109,protein_coding	316.166	-1.03099	-1.06807	0.211843	-4.8668	1.13422e-06	9.35904e-05
ENSG00000197977.3,ELOVL2,protein_coding	1546.65	-1.95819	-2.24187	0.402637	-4.86342	1.15376e-06	9.49422e-05
ENSG00000157240.3,FZD1,protein_coding	625.87	-1.50828	-1.63935	0.310188	-4.86248	1.15922e-06	9.51322e-05
ENSG00000013293.5,SLC7A14,protein_coding	323.205	2.34693	3.21745	0.483109	4.85798	1.18591e-06	9.6822e-05
ENSG00000234882.1,EIF3EP1,processed_pseudogene	107.996	1.30537	1.38889	0.268738	4.85741	1.18931e-06	9.6822e-05
ENSG00000235903.7,CPB2-AS1,antisense	90.0366	1.8032	2.06146	0.371229	4.85739	1.18946e-06	9.6822e-05
ENSG00000187244.10,BCAM,protein_coding	251.62	-1.46081	-1.56882	0.300994	-4.85331	1.21419e-06	9.85685e-05
ENSG00000196781.13,TLE1,protein_coding	646.885	-1.09008	-1.13195	0.224638	-4.85262	1.2184e-06	9.86445e-05
ENSG00000168404.12,MLKL,protein_coding	145.028	-1.25711	-1.3309	0.259172	-4.8505	1.23152e-06	9.94398e-05
ENSG00000261468.1,RP11-1024P17.1,sense_overlapping	45.965	-1.52186	-1.65985	0.314004	-4.84664	1.25573e-06	0.000101123
ENSG00000177951.17,BET1L,protein_coding	581.061	-0.766647	-0.783173	0.158232	-4.84507	1.26565e-06	0.00010138
ENSG00000176749.8,CDK5R1,protein_coding	608.905	1.48587	1.60992	0.306652	4.84545	1.26322e-06	0.00010138
ENSG00000173898.11,SPTBN2,protein_coding	683.205	1.36721	1.46315	0.282477	4.84008	1.29784e-06	0.000103683
ENSG00000053524.11,MCF2L2,protein_coding	414.782	1.58654	1.74531	0.327841	4.83935	1.30264e-06	0.000103791
ENSG00000258548.5,LINC00645,lincRNA	60.0662	2.52379	3.71687	0.521725	4.83739	1.31553e-06	0.000104541
ENSG00000249464.5,LINC01091,lincRNA	46.9835	-1.55712	-1.69923	0.322142	-4.83364	1.34059e-06	0.000105973
ENSG00000087495.16,PHACTR3,protein_coding	334.75	2.20905	2.78042	0.456977	4.83406	1.33776e-06	0.000105973
ENSG00000145908.12,ZNF300,protein_coding	834.608	1.17653	1.23314	0.243469	4.83236	1.34927e-06	0.000106381
ENSG00000089012.14,SIRPG,protein_coding	2.33178	-2.56377	-3.91454	0.530781	-4.83019	1.36404e-06	0.000107264
ENSG00000105825.11,TFPI2,protein_coding	26.7507	-2.44373	-3.32666	0.506088	-4.82867	1.3745e-06	0.000107805
ENSG00000161955.16,TNFSF13,protein_coding	155.989	-1.34046	-1.42926	0.278097	-4.8201	1.43489e-06	0.000111958
ENSG00000197951.8,ZNF71,protein_coding	525.44	0.966419	0.998692	0.200485	4.8204	1.43274e-06	0.000111958
ENSG00000050730.15,TNIP3,protein_coding	2.64386	-2.45953	-3.46538	0.510382	-4.819	1.44279e-06	0.000112264
ENSG00000100228.12,RAB36,protein_coding	234.416	-1.39792	-1.50525	0.290114	-4.81852	1.44626e-06	0.000112264
ENSG00000204650.13,CRHR1-IT1,processed_transcript	952.488	1.2622	1.34342	0.262048	4.81667	1.45973e-06	0.000113019
ENSG00000213160.9,KLHL23,protein_coding	666.595	1.05814	1.10094	0.219742	4.81538	1.46921e-06	0.000113171
ENSG00000112144.15,ICK,protein_coding	771.935	0.915628	0.943449	0.190141	4.81551	1.46825e-06	0.000113171
ENSG00000175967.3,RP11-544L8__B.4,antisense	15.1254	2.01452	2.41729	0.418479	4.8139	1.48016e-06	0.000113434
ENSG00000196109.6,ZNF676,protein_coding	53.9371	2.70686	5.28005	0.562268	4.81417	1.4781e-06	0.000113434
ENSG00000182504.10,CEP97,protein_coding	1114.84	0.914682	0.941711	0.190115	4.81121	1.50022e-06	0.000114416
ENSG00000119547.5,ONECUT2,protein_coding	747.889	2.07627	2.47415	0.431553	4.81116	1.50057e-06	0.000114416
ENSG00000278012.1,RP1-310O13.13,sense_intronic	5.42778	2.62463	4.85057	0.546076	4.80636	1.53706e-06	0.000116902
ENSG00000243649.8,CFB,protein_coding	171.358	-1.7995	-2.06372	0.374459	-4.80559	1.54294e-06	0.000117054
ENSG00000170899.10,GSTA4,protein_coding	438.128	1.0717	1.11903	0.223105	4.80358	1.55854e-06	0.00011794
ENSG00000236508.1,ATP13A5-AS1,antisense	2.9672	2.62533	4.79842	0.546906	4.80032	1.5841e-06	0.000119574
ENSG00000161405.16,IKZF3,protein_coding	75.9773	-1.93107	-2.25776	0.40233	-4.79971	1.58897e-06	0.000119642
ENSG00000196911.9,KPNA5,protein_coding	566.895	1.05824	1.10431	0.220507	4.79911	1.59375e-06	0.000119702
ENSG00000157227.12,MMP14,protein_coding	1746.52	-1.40891	-1.51408	0.293633	-4.79821	1.60087e-06	0.000119938
ENSG00000130066.16,SAT1,protein_coding	3002.88	-1.12647	-1.17697	0.234835	-4.79685	1.61184e-06	0.00012046
ENSG00000182162.10,P2RY8,protein_coding	37.3953	-1.9205	-2.24439	0.400565	-4.79448	1.63099e-06	0.000121369
ENSG00000123570.3,RAB9B,protein_coding	289.388	1.19626	1.25207	0.249514	4.79435	1.63206e-06	0.000121369
ENSG00000269226.7,RP11-722G7.1,protein_coding	219.054	1.37295	1.46773	0.286467	4.79271	1.64547e-06	0.000122065
ENSG00000164684.13,ZNF704,protein_coding	3114.6	1.18353	1.24581	0.24699	4.79181	1.65285e-06	0.000122311
ENSG00000281881.1,SPRY4-IT1,lincRNA	164.506	-1.86873	-2.15959	0.390102	-4.79037	1.66477e-06	0.000122891
ENSG00000152818.18,UTRN,protein_coding	4197.86	-0.946699	-0.975028	0.197735	-4.7877	1.68701e-06	0.000124134
ENSG00000128602.9,SMO,protein_coding	562.385	-0.984252	-1.02022	0.205594	-4.78736	1.68985e-06	0.000124134
ENSG00000170017.12,ALCAM,protein_coding	1670.58	1.23015	1.29624	0.257033	4.78596	1.70169e-06	0.000124463
ENSG00000223812.5,RP11-197K6.1,lincRNA	9.12284	2.69378	8.39079	0.562863	4.78586	1.70259e-06	0.000124463
ENSG00000015413.9,DPEP1,protein_coding	24.1026	-2.33019	-3.19374	0.486966	-4.78512	1.70889e-06	0.000124621
ENSG00000255330.9,RP3-403A15.5,protein_coding	883.2	1.37879	1.47478	0.288197	4.78419	1.7168e-06	0.000124709
ENSG00000141622.13,RNF165,protein_coding	603.471	1.29164	1.36387	0.269992	4.784	1.71838e-06	0.000124709
ENSG00000167202.11,TBC1D2B,protein_coding	997.632	-0.847665	-0.869462	0.177271	-4.78175	1.73776e-06	0.00012521
ENSG00000176974.17,SHMT1,protein_coding	377.508	-0.94079	-0.968955	0.196718	-4.78242	1.73201e-06	0.00012521
ENSG00000141905.17,NFIC,protein_coding	4159.27	-0.801333	-0.819678	0.16757	-4.78207	1.73496e-06	0.00012521
ENSG00000265763.3,ZNF488,protein_coding	135.393	2.44076	3.5099	0.511128	4.77524	1.79497e-06	0.000129023
ENSG00000241697.4,TMEFF1,protein_coding	88.2595	2.12116	2.62476	0.44481	4.7687	1.85421e-06	0.000132965
ENSG00000197948.10,FCHSD1,protein_coding	420.217	-1.17547	-1.23781	0.246822	-4.76241	1.91293e-06	0.00013685
ENSG00000164010.13,ERMAP,protein_coding	381.187	-0.755798	-0.77001	0.158725	-4.76169	1.91977e-06	0.000137013
ENSG00000010327.10,STAB1,protein_coding	3748.84	-1.45139	-1.57523	0.30494	-4.75959	1.9399e-06	0.000138123
ENSG00000253738.1,OTUD6B-AS1,antisense	473.16	0.789883	0.807358	0.165985	4.75875	1.94796e-06	0.000138369
ENSG00000279465.1,RP11-44D5.2,TEC	4.65934	2.603	4.746	0.547303	4.75605	1.97413e-06	0.000139671
ENSG00000169891.17,REPS2,protein_coding	309.298	1.88525	2.19496	0.396401	4.75591	1.97555e-06	0.000139671
ENSG00000115884.10,SDC1,protein_coding	228.422	-1.72469	-1.93689	0.362966	-4.75167	2.01744e-06	0.000141966
ENSG00000183715.13,OPCML,protein_coding	537.367	2.04962	2.48905	0.431329	4.75186	2.01549e-06	0.000141966
ENSG00000175482.8,POLD4,protein_coding	207.462	-1.1361	-1.18825	0.23916	-4.75037	2.03043e-06	0.000142547
ENSG00000078098.13,FAP,protein_coding	150.406	-1.88083	-2.19206	0.396182	-4.74738	2.06064e-06	0.000143331
ENSG00000156049.6,GNA14,protein_coding	69.8538	-1.55766	-1.71483	0.328046	-4.7483	2.0513e-06	0.000143331
ENSG00000110660.14,SLC35F2,protein_coding	228.177	-1.22551	-1.2935	0.258079	-4.74857	2.04861e-06	0.000143331
ENSG00000259554.1,RP11-408J6.1,sense_intronic	6.77565	2.34041	3.39151	0.492945	4.74782	2.05619e-06	0.000143331
ENSG00000154380.17,ENAH,protein_coding	5158.13	1.02927	1.0696	0.216966	4.74393	2.09607e-06	0.000145459
ENSG00000104972.15,LILRB1,protein_coding	160.293	-1.33566	-1.43177	0.281601	-4.74311	2.10467e-06	0.00014572
ENSG00000267641.1,BNIP3P16,processed_pseudogene	4.08064	2.46802	3.81839	0.52043	4.74227	2.11342e-06	0.000145991
ENSG00000233858.4,AC026904.1,lincRNA	30.6462	-2.1748	-2.78431	0.458806	-4.74013	2.13578e-06	0.000147198
ENSG00000134323.10,MYCN,protein_coding	144.715	1.92228	2.26116	0.405612	4.73921	2.14549e-06	0.000147529
ENSG00000100342.20,APOL1,protein_coding	233.284	-1.68683	-1.90312	0.35609	-4.73711	2.1679e-06	0.000148731
ENSG00000099139.13,PCSK5,protein_coding	494.642	-1.20234	-1.26591	0.253854	-4.73634	2.17616e-06	0.000148958
ENSG00000130592.13,LSP1,protein_coding	190.938	-1.20798	-1.27944	0.255093	-4.73545	2.18565e-06	0.000149268
ENSG00000279693.1,RP11-71L14.3,TEC	55.1495	2.2341	2.86505	0.471995	4.73331	2.20882e-06	0.00015051
ENSG00000169981.10,ZNF35,protein_coding	324.567	0.692535	0.704318	0.146326	4.73283	2.21411e-06	0.000150529
ENSG00000153246.11,PLA2R1,protein_coding	340.893	-2.07008	-2.55149	0.437721	-4.72922	2.2538e-06	0.000152883
ENSG00000054523.17,KIF1B,protein_coding	10150.3	0.789432	0.808366	0.167021	4.72655	2.28371e-06	0.000154563
ENSG00000260838.3,RP11-531A24.3,lincRNA	7.50572	2.59762	4.86284	0.549695	4.72557	2.29472e-06	0.000154726
ENSG00000149131.15,SERPING1,protein_coding	791.219	-1.52065	-1.6627	0.321801	-4.72542	2.29639e-06	0.000154726
ENSG00000272077.1,RP11-348P10.2,lincRNA	196.771	1.22951	1.30201	0.260318	4.7231	2.32271e-06	0.00015615
ENSG00000106077.18,ABHD11,protein_coding	144.361	-0.94365	-0.972392	0.199855	-4.72167	2.33911e-06	0.000156691
ENSG00000140836.14,ZFHX3,protein_coding	2265.98	-0.780548	-0.797182	0.165318	-4.7215	2.34115e-06	0.000156691
ENSG00000181085.14,MAPK15,protein_coding	46.9492	-2.48075	-3.52945	0.525525	-4.72052	2.35238e-06	0.000157093
ENSG00000167323.9,STIM1,protein_coding	706.255	-0.941968	-0.971358	0.199633	-4.7185	2.37591e-06	0.000158313
ENSG00000144847.12,IGSF11,protein_coding	956.15	0.987	1.02538	0.2092	4.71797	2.38214e-06	0.000158378
ENSG00000184517.11,ZFP1,protein_coding	348.408	0.889032	0.918001	0.188501	4.71632	2.40148e-06	0.000159312
ENSG00000146376.10,ARHGAP18,protein_coding	554.066	-1.22101	-1.28555	0.258977	-4.71475	2.42006e-06	0.000160192
ENSG00000131791.7,PRKAB2,protein_coding	931.957	0.728074	0.741318	0.154479	4.7131	2.43979e-06	0.000160824
ENSG00000155111.14,CDK19,protein_coding	1137.88	0.814219	0.838298	0.172758	4.71306	2.44029e-06	0.000160824
ENSG00000259943.1,RP1-39G22.7,antisense	146.134	0.846084	0.86967	0.179565	4.71186	2.45468e-06	0.000161068
ENSG00000011465.16,DCN,protein_coding	927.861	-1.97482	-2.35527	0.419079	-4.71228	2.44957e-06	0.000161068
ENSG00000162728.4,KCNJ9,protein_coding	190.715	2.09095	2.57767	0.444203	4.7072	2.51144e-06	0.000164434
ENSG00000084112.14,SSH1,protein_coding	1594.07	-0.660196	-0.670762	0.140337	-4.70436	2.54666e-06	0.000166378
ENSG00000187189.10,TSPYL4,protein_coding	973.774	0.740478	0.754992	0.157436	4.70335	2.55929e-06	0.000166841
ENSG00000155760.2,FZD7,protein_coding	630.895	-1.7129	-1.92304	0.364258	-4.70244	2.57069e-06	0.000166862
ENSG00000197321.14,SVIL,protein_coding	578.589	-1.6104	-1.7936	0.342437	-4.70275	2.56681e-06	0.000166862
ENSG00000186310.9,NAP1L3,protein_coding	295.005	1.32444	1.41378	0.281682	4.70189	2.57762e-06	0.000166952
ENSG00000167779.7,IGFBP6,protein_coding	42.6232	-1.98547	-2.3761	0.42256	-4.69866	2.61877e-06	0.000168922
ENSG00000167208.14,SNX20,protein_coding	73.7247	-1.54256	-1.69544	0.328301	-4.69862	2.61925e-06	0.000168922
ENSG00000136826.14,KLF4,protein_coding	227.938	-1.45925	-1.58823	0.310866	-4.69415	2.67717e-06	0.000171921
ENSG00000197405.7,C5AR1,protein_coding	337.182	-1.64505	-1.84211	0.350433	-4.69433	2.67477e-06	0.000171921
ENSG00000168016.13,TRANK1,protein_coding	880.829	-1.00351	-1.04325	0.21397	-4.68996	2.73253e-06	0.000174361
ENSG00000253230.6,LINC00599,lincRNA	368.368	2.26646	3.00188	0.48318	4.69072	2.72246e-06	0.000174361
ENSG00000142102.15,ATHL1,protein_coding	718.598	-1.31057	-1.39859	0.279426	-4.6902	2.72936e-06	0.000174361
ENSG00000025156.12,HSF2,protein_coding	221.008	0.955845	0.995739	0.203913	4.68751	2.76548e-06	0.00017609
ENSG00000116675.15,DNAJC6,protein_coding	855.724	1.22161	1.30255	0.260649	4.68678	2.77534e-06	0.000176345
ENSG00000023287.12,RB1CC1,protein_coding	1904.15	0.618686	0.627703	0.13203	4.68594	2.78677e-06	0.000176699
ENSG00000235389.2,RP11-134K1.3,sense_intronic	8.98119	2.21662	2.91387	0.473405	4.68228	2.83704e-06	0.000179509
ENSG00000172493.20,AFF1,protein_coding	3019.17	-0.692315	-0.704968	0.148	-4.67779	2.89984e-06	0.000183097
ENSG00000106511.5,MEOX2,protein_coding	387.585	-2.26926	-2.99738	0.485183	-4.67712	2.90936e-06	0.000183314
ENSG00000172932.14,ANKRD13D,protein_coding	625.322	-0.595848	-0.603482	0.127507	-4.67308	2.96719e-06	0.000186301
ENSG00000279771.1,AP000997.3,TEC	14.4483	-2.0518	-2.53794	0.439091	-4.67285	2.97053e-06	0.000186301
ENSG00000111145.7,ELK3,protein_coding	710.991	-1.27181	-1.35014	0.27219	-4.67252	2.97532e-06	0.000186301
ENSG00000044524.10,EPHA3,protein_coding	1012.17	-2.23948	-2.92988	0.479438	-4.67105	2.99659e-06	0.000187243
ENSG00000120158.11,RCL1,protein_coding	214.184	0.823988	0.844064	0.176576	4.66647	3.06416e-06	0.000191069
ENSG00000099250.17,NRP1,protein_coding	2129.45	-1.06269	-1.10684	0.227822	-4.66456	3.09285e-06	0.000192459
ENSG00000106034.17,CPED1,protein_coding	181.927	-1.30517	-1.39681	0.279861	-4.66362	3.10701e-06	0.000192942
ENSG00000121068.13,TBX2,protein_coding	697.222	-1.31384	-1.39786	0.281803	-4.66227	3.12747e-06	0.000193813
ENSG00000214711.9,CAPN14,protein_coding	13.8443	2.12752	2.77241	0.456597	4.65952	3.16951e-06	0.000195614
ENSG00000178235.7,SLITRK1,protein_coding	387.592	2.33435	3.16249	0.500944	4.65989	3.16375e-06	0.000195614
ENSG00000156869.12,FRRS1,protein_coding	39.9011	-1.68676	-1.90647	0.362183	-4.65721	3.20525e-06	0.000196091
ENSG00000228956.8,SATB1-AS1,processed_transcript	75.2214	2.07592	2.54418	0.445796	4.65665	3.21394e-06	0.000196091
ENSG00000082781.11,ITGB5,protein_coding	630.253	-1.14967	-1.21163	0.246886	-4.65667	3.2137e-06	0.000196091
ENSG00000137462.6,TLR2,protein_coding	620.998	-1.29479	-1.38241	0.277997	-4.65758	3.19953e-06	0.000196091
ENSG00000181634.7,TNFSF15,protein_coding	29.6768	-1.30379	-1.40381	0.279938	-4.65742	3.20196e-06	0.000196091
ENSG00000197555.9,SIPA1L1,protein_coding	3585.47	-0.963168	-0.996421	0.206844	-4.6565	3.21631e-06	0.000196091
ENSG00000166025.17,AMOTL1,protein_coding	2182.94	-0.941735	-0.973355	0.202271	-4.65581	3.22703e-06	0.000196347
ENSG00000121858.10,TNFSF10,protein_coding	120.175	-1.4142	-1.5325	0.303789	-4.6552	3.23662e-06	0.000196533
ENSG00000129038.15,LOXL1,protein_coding	243.267	-1.99339	-2.37299	0.428265	-4.65456	3.24673e-06	0.00019675
ENSG00000137700.16,SLC37A4,protein_coding	337.079	-0.857169	-0.879769	0.184177	-4.65405	3.25475e-06	0.000196841
ENSG00000236908.2,RP5-1063M23.2,lincRNA	19.9837	-2.3139	-3.14778	0.497312	-4.65281	3.27446e-06	0.000197636
ENSG00000260423.1,RP13-735L24.1,lincRNA	25.2565	2.07896	2.63943	0.446976	4.65116	3.30075e-06	0.000198824
ENSG00000205810.8,KLRC3,protein_coding	26.1104	2.29597	3.00467	0.4937	4.65053	3.31076e-06	0.000199029
ENSG00000279400.1,CTD-2353F22.2,TEC	1761.17	-1.26624	-1.3448	0.272433	-4.64789	3.35347e-06	0.000201195
ENSG00000113595.14,TRIM23,protein_coding	467.568	0.701729	0.716706	0.151027	4.64637	3.37834e-06	0.000202284
ENSG00000130511.15,SSBP4,protein_coding	537.049	-0.974975	-1.01002	0.210023	-4.64222	3.44686e-06	0.000205977
ENSG00000027644.4,INSRR,protein_coding	34.9343	-1.95953	-2.40058	0.422199	-4.64126	3.46295e-06	0.000206529
ENSG00000079691.17,LRRC16A,protein_coding	559.796	-1.43975	-1.56544	0.310285	-4.6401	3.48246e-06	0.000206874
ENSG00000109113.17,RAB34,protein_coding	444.737	-1.56128	-1.71728	0.336464	-4.64028	3.47943e-06	0.000206874
ENSG00000124839.12,RAB17,protein_coding	21.0287	-1.60357	-1.77691	0.345672	-4.639	3.50102e-06	0.000207566
ENSG00000205927.4,OLIG2,protein_coding	967.706	1.52589	1.68223	0.329182	4.63539	3.56269e-06	0.000210808
ENSG00000158113.12,LRRC43,protein_coding	21.27	-1.95418	-2.34894	0.421915	-4.63169	3.627e-06	0.000213356
ENSG00000131089.13,ARHGEF9,protein_coding	1195.34	0.888246	0.913029	0.191748	4.63235	3.61538e-06	0.000213356
ENSG00000079482.12,OPHN1,protein_coding	1818.49	1.23062	1.3195	0.26569	4.63178	3.6253e-06	0.000213356
ENSG00000136542.8,GALNT5,protein_coding	146.958	-2.06325	-2.53809	0.445753	-4.62868	3.68004e-06	0.000216054
ENSG00000074966.10,TXK,protein_coding	11.6507	-1.9997	-2.42331	0.432176	-4.62706	3.70898e-06	0.000217329
ENSG00000170776.19,AKAP13,protein_coding	4575.28	-0.828393	-0.849637	0.179085	-4.62568	3.73366e-06	0.000217927
ENSG00000068903.19,SIRT2,protein_coding	1519.14	1.18606	1.25823	0.256386	4.62607	3.72669e-06	0.000217927
ENSG00000137393.9,RNF144B,protein_coding	320.175	-1.2971	-1.38833	0.280453	-4.62503	3.74544e-06	0.000218192
ENSG00000275383.1,RP11-615I2.6,lincRNA	73.9497	1.72343	1.94249	0.372964	4.6209	3.82076e-06	0.000221758
ENSG00000266378.1,RP11-214O1.3,lincRNA	74.1018	-2.1772	-2.93391	0.471166	-4.62087	3.82138e-06	0.000221758
ENSG00000266709.1,RP11-214O1.2,lincRNA	88.8479	-2.05581	-2.56547	0.444966	-4.62016	3.83445e-06	0.000222088
ENSG00000229191.1,RP11-168O16.1,antisense	39.102	2.31963	3.19675	0.502127	4.61961	3.8446e-06	0.000222249
ENSG00000110987.8,BCL7A,protein_coding	300.925	1.15035	1.20596	0.249053	4.61891	3.8576e-06	0.000222573
ENSG00000282890.1,RP11-460M2.1,lincRNA	5.38126	2.48399	4.40538	0.537923	4.61775	3.87931e-06	0.000223398
ENSG00000185565.11,LSAMP,protein_coding	5568.46	1.44203	1.57144	0.312315	4.61725	3.88863e-06	0.000223507
ENSG00000033100.14,CHPF2,protein_coding	1388.38	-0.90863	-0.938686	0.196869	-4.6154	3.92331e-06	0.000224432
ENSG00000129757.12,CDKN1C,protein_coding	111.459	1.70176	1.93496	0.36873	4.6152	3.92708e-06	0.000224432
ENSG00000261821.2,CTD-2311M21.3,antisense	4.52456	-2.5508	-4.92015	0.55263	-4.61574	3.91701e-06	0.000224432
ENSG00000223389.1,SDCBP2P1,processed_pseudogene	3.45846	2.53846	5.30781	0.550403	4.61201	3.98794e-06	0.000226194
ENSG00000070540.12,WIPI1,protein_coding	200.64	-1.1021	-1.15501	0.238919	-4.61287	3.97142e-06	0.000226194
ENSG00000105329.9,TGFB1,protein_coding	521.142	-1.06488	-1.11267	0.230886	-4.61215	3.9852e-06	0.000226194
ENSG00000203999.8,LINC01270,lincRNA	29.3931	-1.55116	-1.71501	0.336289	-4.61259	3.97683e-06	0.000226194
ENSG00000164418.19,GRIK2,protein_coding	1186.32	1.93533	2.32165	0.419959	4.60837	4.05844e-06	0.00022976
ENSG00000165806.19,CASP7,protein_coding	205.014	-1.26803	-1.35538	0.275232	-4.60712	4.08283e-06	0.000230707
ENSG00000180667.10,YOD1,protein_coding	695.471	0.851165	0.87491	0.184986	4.60123	4.19999e-06	0.000236882
ENSG00000135446.16,CDK4,protein_coding	4697.84	2.1492	2.57121	0.467192	4.60024	4.21999e-06	0.000237566
ENSG00000206562.11,METTL6,protein_coding	362.142	0.574584	0.581486	0.124959	4.59819	4.26171e-06	0.000239467
ENSG00000101557.14,USP14,protein_coding	1135.84	0.560104	0.567572	0.121955	4.59269	4.37566e-06	0.000245412
ENSG00000182179.10,UBA7,protein_coding	706.279	-0.886399	-0.913294	0.193232	-4.58723	4.49155e-06	0.000250982
ENSG00000164136.16,IL15,protein_coding	87.9926	-1.56064	-1.75321	0.340232	-4.58699	4.49671e-06	0.000250982
ENSG00000225511.6,LINC00475,lincRNA	26.7861	-2.35414	-3.34729	0.513236	-4.58684	4.49997e-06	0.000250982
ENSG00000110090.12,CPT1A,protein_coding	683.795	-1.07203	-1.11793	0.233877	-4.58374	4.56732e-06	0.000254267
ENSG00000168333.13,C8orf22,protein_coding	40.9152	2.58347	6.32324	0.563799	4.58225	4.5999e-06	0.000255137
ENSG00000261728.1,RP11-307O13.1,lincRNA	5.02232	2.49824	4.14327	0.545171	4.5825	4.59455e-06	0.000255137
ENSG00000179456.10,ZBTB18,protein_coding	1479.91	1.46132	1.59167	0.319016	4.58071	4.63407e-06	0.000255176
ENSG00000150630.3,VEGFC,protein_coding	19.2642	-1.73642	-2.02674	0.379063	-4.58083	4.6313e-06	0.000255176
ENSG00000012779.10,ALOX5,protein_coding	234.109	-1.27945	-1.36898	0.279313	-4.58069	4.63448e-06	0.000255176
ENSG00000165409.15,TSHR,protein_coding	61.8362	2.50911	3.99426	0.547716	4.58105	4.62653e-06	0.000255176
ENSG00000136286.14,MYO1G,protein_coding	139.478	-1.20047	-1.27402	0.262228	-4.57795	4.69556e-06	0.000258067
ENSG00000043462.11,LCP2,protein_coding	460.279	-1.04759	-1.09365	0.228879	-4.57705	4.71568e-06	0.000258701
ENSG00000154227.13,CERS3,protein_coding	12.5658	2.11549	2.77602	0.462315	4.57586	4.74273e-06	0.000259712
ENSG00000115507.9,OTX1,protein_coding	203.14	-2.08265	-2.54434	0.45522	-4.57504	4.76124e-06	0.000260252
ENSG00000178199.13,ZC3H12D,protein_coding	73.6611	-1.28192	-1.37288	0.280271	-4.57386	4.7881e-06	0.000260774
ENSG00000100604.12,CHGA,protein_coding	92.1739	2.37864	4.14772	0.520017	4.57416	4.78132e-06	0.000260774
ENSG00000151151.5,IPMK,protein_coding	309.659	0.931495	0.961973	0.203769	4.57133	4.84639e-06	0.000263472
ENSG00000222009.8,BTBD19,protein_coding	409.399	-1.31514	-1.41205	0.287745	-4.57049	4.86588e-06	0.000264055
ENSG00000119655.8,NPC2,protein_coding	548.433	-1.2051	-1.2755	0.263697	-4.57002	4.87681e-06	0.000264172
ENSG00000181830.8,SLC35C1,protein_coding	211.164	-0.851316	-0.875826	0.186342	-4.56857	4.91058e-06	0.000265524
ENSG00000111249.13,CUX2,protein_coding	38.4482	2.26494	3.09907	0.495871	4.5676	4.93352e-06	0.000266286
ENSG00000253304.1,TMEM200B,protein_coding	34.0898	-1.627	-1.83339	0.356287	-4.56654	4.95851e-06	0.000266504
ENSG00000111199.10,TRPV4,protein_coding	20.3725	-1.48051	-1.63092	0.324226	-4.5663	4.96409e-06	0.000266504
ENSG00000264515.5,CTC-525D6.1,processed_transcript	8.79612	2.41528	3.85458	0.528886	4.56672	4.9541e-06	0.000266504
ENSG00000041880.14,PARP3,protein_coding	282.772	-1.08381	-1.13747	0.237412	-4.56509	4.9929e-06	0.000267213
ENSG00000128849.10,CGNL1,protein_coding	709.109	-1.25629	-1.34338	0.275201	-4.565	4.99505e-06	0.000267213
ENSG00000280406.1,RP11-379L18.2,TEC	33.8769	1.80624	2.1105	0.395738	4.56424	5.01316e-06	0.000267706
ENSG00000174607.10,UGT8,protein_coding	685.815	2.12434	2.75135	0.465472	4.56385	5.0225e-06	0.00026773
ENSG00000148841.15,ITPRIP,protein_coding	570.936	-1.15302	-1.21618	0.252709	-4.56265	5.05121e-06	0.000268785
ENSG00000002746.14,HECW1,protein_coding	256.023	1.97895	2.39942	0.433959	4.56023	5.1098e-06	0.000271423
ENSG00000174469.17,CNTNAP2,protein_coding	360.536	2.2052	2.96198	0.483763	4.55842	5.15397e-06	0.000272807
ENSG00000174165.7,ZDHHC24,protein_coding	279.908	-0.641588	-0.65143	0.140745	-4.5585	5.15195e-06	0.000272807
ENSG00000229676.2,ZNF492,protein_coding	23.0476	2.42777	3.59259	0.532666	4.55776	5.17009e-06	0.00027318
ENSG00000118971.7,CCND2,protein_coding	18823.5	1.82744	2.12332	0.401023	4.55694	5.19038e-06	0.000273772
ENSG00000169398.19,PTK2,protein_coding	3058.53	0.536518	0.542974	0.117771	4.5556	5.22356e-06	0.00027504
ENSG00000173442.12,EHBP1L1,protein_coding	1426.47	-1.26841	-1.356	0.278532	-4.55393	5.26538e-06	0.000276758
ENSG00000277443.1,MARCKS,protein_coding	6577.25	1.00932	1.05059	0.221671	4.55321	5.28331e-06	0.000277217
ENSG00000196361.9,ELAVL3,protein_coding	945.19	1.6961	1.93497	0.372631	4.5517	5.32138e-06	0.000278729
ENSG00000163694.14,RBM47,protein_coding	369.798	-1.24183	-1.32243	0.272866	-4.55106	5.33774e-06	0.000279101
ENSG00000161091.12,MFSD12,protein_coding	764.395	-0.753181	-0.770331	0.165556	-4.54941	5.3797e-06	0.000280808
ENSG00000186815.12,TPCN1,protein_coding	1255.48	-0.908926	-0.937127	0.199824	-4.54863	5.39959e-06	0.000281358
ENSG00000233608.3,TWIST2,protein_coding	17.068	-2.41349	-3.7039	0.530765	-4.54719	5.43666e-06	0.0002828
ENSG00000111341.9,MGP,protein_coding	492.819	-1.7959	-2.06274	0.394984	-4.54678	5.44729e-06	0.000282865
ENSG00000158714.10,SLAMF8,protein_coding	88.0535	-1.64909	-1.86336	0.362862	-4.54468	5.50187e-06	0.000285207
ENSG00000114744.8,COMMD2,protein_coding	768.207	0.623684	0.632835	0.13728	4.54315	5.5421e-06	0.000286799
ENSG00000033122.18,LRRC7,protein_coding	401.469	2.28115	3.02153	0.502149	4.54277	5.55198e-06	0.000286817
ENSG00000172687.13,ZNF738,protein_coding	319.803	1.1843	1.25322	0.260733	4.54219	5.56738e-06	0.00028712
ENSG00000229124.6,VIM-AS1,antisense	29.7601	-1.0579	-1.11144	0.232927	-4.54174	5.57927e-06	0.000287242
ENSG00000008513.14,ST3GAL1,protein_coding	664.066	-1.17358	-1.24767	0.258532	-4.53941	5.64113e-06	0.000289931
ENSG00000279090.1,RP11-684N3.1,TEC	5.06433	2.41768	4.23215	0.53266	4.53888	5.65544e-06	0.000290171
ENSG00000132872.11,SYT4,protein_coding	153.806	2.20586	2.87554	0.486279	4.53621	5.72743e-06	0.000293365
ENSG00000256664.1,RP11-611O2.3,processed_pseudogene	148.104	-1.99806	-2.45862	0.440543	-4.53545	5.74795e-06	0.000293418
ENSG00000093072.15,CECR1,protein_coding	488.077	-1.43477	-1.56918	0.316323	-4.53578	5.73907e-06	0.000293418
ENSG00000187672.12,ERC2,protein_coding	304.76	1.70036	1.93239	0.375081	4.5333	5.80705e-06	0.000295434
ENSG00000138798.11,EGF,protein_coding	78.7164	-1.61115	-1.80839	0.3554	-4.53336	5.8054e-06	0.000295434
ENSG00000112541.13,PDE10A,protein_coding	260.271	1.5824	1.77714	0.349269	4.5306	5.8815e-06	0.000298717
ENSG00000237765.6,FAM200B,protein_coding	459.565	0.729189	0.744578	0.16113	4.52548	6.02593e-06	0.000304997
ENSG00000122870.11,BICC1,protein_coding	228.952	-1.60804	-1.80444	0.355357	-4.52514	6.03554e-06	0.000304997
ENSG00000135378.3,PRRG4,protein_coding	66.1372	-1.82768	-2.09942	0.403837	-4.52578	6.01726e-06	0.000304997
ENSG00000228784.7,LINC00954,lincRNA	17.1045	-1.72102	-1.97185	0.380415	-4.52407	6.06614e-06	0.000305058
ENSG00000121807.5,CCR2,protein_coding	14.306	-2.19277	-2.87694	0.4848	-4.52304	6.09591e-06	0.000305058
ENSG00000163378.13,EOGT,protein_coding	395.422	-0.756627	-0.77338	0.167292	-4.5228	6.10282e-06	0.000305058
ENSG00000083067.22,TRPM3,protein_coding	1243.88	-2.06229	-2.59115	0.456029	-4.52228	6.11777e-06	0.000305058
ENSG00000148842.17,CNNM2,protein_coding	463.895	0.838658	0.861029	0.185445	4.52242	6.1137e-06	0.000305058
ENSG00000080166.15,DCT,protein_coding	158.919	2.05499	2.53091	0.45422	4.52421	6.06205e-06	0.000305058
ENSG00000100968.13,NFATC4,protein_coding	564.102	-1.11575	-1.17242	0.246697	-4.52276	6.10388e-06	0.000305058
ENSG00000049759.16,NEDD4L,protein_coding	1439.68	0.97236	1.00836	0.214995	4.5227	6.10548e-06	0.000305058
ENSG00000172936.12,MYD88,protein_coding	439.528	-0.66162	-0.674493	0.146341	-4.52107	6.15267e-06	0.000306291
ENSG00000185219.16,ZNF445,protein_coding	2875.4	0.760369	0.777391	0.168265	4.51888	6.21685e-06	0.000308742
ENSG00000213445.8,SIPA1,protein_coding	436.785	-1.21742	-1.2944	0.269419	-4.51869	6.22241e-06	0.000308742
ENSG00000144339.11,TMEFF2,protein_coding	308.502	2.21614	2.92536	0.490729	4.51602	6.30132e-06	0.000311765
ENSG00000259129.5,LINC00648,lincRNA	32.9304	2.37444	3.45101	0.525793	4.51593	6.30404e-06	0.000311765
ENSG00000089060.11,SLC8B1,protein_coding	423.576	-0.959757	-0.996118	0.212584	-4.51473	6.33982e-06	0.000313021
ENSG00000159593.14,NAE1,protein_coding	579.899	0.686215	0.699973	0.152022	4.51391	6.36435e-06	0.000313359
ENSG00000102290.21,PCDH11X,protein_coding	345.111	2.44779	3.95889	0.542289	4.51381	6.36747e-06	0.000313359
ENSG00000102575.10,ACP5,protein_coding	35.0823	-2.11297	-2.67218	0.468376	-4.51128	6.44388e-06	0.000316602
ENSG00000125249.6,RAP2A,protein_coding	1999.9	1.01756	1.06192	0.225599	4.5105	6.46759e-06	0.000317249
ENSG00000138658.15,ZGRF1,protein_coding	695.743	0.833719	0.855947	0.184856	4.51009	6.47996e-06	0.000317339
ENSG00000142621.19,FHAD1,protein_coding	185.707	-1.70362	-1.93922	0.377835	-4.5089	6.51656e-06	0.000318387
ENSG00000248587.6,GDNF-AS1,lincRNA	101.788	2.00815	2.42668	0.445393	4.5087	6.52249e-06	0.000318387
ENSG00000255371.1,OPCML-IT2,sense_intronic	14.7185	2.17495	2.91919	0.482531	4.50738	6.56342e-06	0.000319349
ENSG00000130054.4,FAM155B,protein_coding	33.0448	1.83853	2.17632	0.407887	4.50746	6.56094e-06	0.000319349
ENSG00000134532.15,SOX5,protein_coding	1283.58	1.10659	1.16341	0.245955	4.49914	6.82274e-06	0.000331168
ENSG00000170190.15,SLC16A5,protein_coding	22.1795	-1.69209	-1.93735	0.376105	-4.49897	6.82831e-06	0.000331168
ENSG00000135046.13,ANXA1,protein_coding	2128.29	-1.43662	-1.57155	0.319486	-4.49668	6.90236e-06	0.000334221
ENSG00000162374.16,ELAVL4,protein_coding	469.259	2.18918	2.91791	0.486992	4.49532	6.94657e-06	0.000335821
ENSG00000102401.19,ARMCX3,protein_coding	1530.78	0.670494	0.682703	0.149352	4.48936	7.14391e-06	0.000344808
ENSG00000120251.18,GRIA2,protein_coding	3927.17	1.49819	1.65294	0.333798	4.48831	7.17891e-06	0.000345943
ENSG00000196576.14,PLXNB2,protein_coding	2675.02	-1.11386	-1.1717	0.248293	-4.48606	7.25525e-06	0.000349063
ENSG00000279561.2,RP11-4L24.4,TEC	711.871	1.3827	1.50073	0.308294	4.485	7.29131e-06	0.000349825
ENSG00000110492.15,MDK,protein_coding	619.887	-1.65009	-1.84791	0.367921	-4.48491	7.29431e-06	0.000349825
ENSG00000167895.14,TMC8,protein_coding	150.566	-1.25779	-1.34633	0.280558	-4.48319	7.35363e-06	0.000352109
ENSG00000071967.11,CYBRD1,protein_coding	1294.01	-1.12092	-1.17725	0.250116	-4.4816	7.40856e-06	0.000352498
ENSG00000113389.15,NPR3,protein_coding	130.999	2.058	2.59091	0.459185	4.48186	7.3994e-06	0.000352498
ENSG00000279586.1,AP000711.1,TEC	75.2034	1.96905	2.41779	0.439295	4.48231	7.38403e-06	0.000352498
ENSG00000141424.12,SLC39A6,protein_coding	1291.49	0.940123	0.977559	0.209753	4.48206	7.39262e-06	0.000352498
ENSG00000153283.12,CD96,protein_coding	23.5666	-2.15025	-2.8077	0.480063	-4.4791	7.4958e-06	0.000356086
ENSG00000197448.13,GSTK1,protein_coding	1080.18	-0.672818	-0.686245	0.150252	-4.47793	7.53719e-06	0.000356926
ENSG00000187210.12,GCNT1,protein_coding	189.524	-1.62331	-1.8382	0.362508	-4.47798	7.53519e-06	0.000356926
ENSG00000273274.1,ZBTB8B,protein_coding	395.068	1.43374	1.56463	0.320302	4.47621	7.59784e-06	0.000359126
ENSG00000067066.16,SP100,protein_coding	927.844	-1.06888	-1.1167	0.238805	-4.47594	7.6075e-06	0.000359126
ENSG00000261135.1,RP4-798A10.7,lincRNA	60.6495	1.55917	1.75712	0.348446	4.47464	7.65404e-06	0.000360758
ENSG00000171522.5,PTGER4,protein_coding	122.349	-1.36771	-1.48491	0.305718	-4.47375	7.68595e-06	0.000361588
ENSG00000120889.12,TNFRSF10B,protein_coding	869.092	-1.26985	-1.35773	0.283862	-4.47348	7.69565e-06	0.000361588
ENSG00000164076.16,CAMKV,protein_coding	164.012	1.87644	2.20696	0.419708	4.47082	7.79205e-06	0.000365547
ENSG00000139438.5,FAM222A,protein_coding	277.096	1.55067	1.72388	0.346897	4.47011	7.81781e-06	0.000366185
ENSG00000136897.7,MRPL50,protein_coding	407.008	0.720536	0.736028	0.161221	4.46925	7.84937e-06	0.000366672
ENSG00000149090.11,PAMR1,protein_coding	255.896	-1.38653	-1.5031	0.310244	-4.46917	7.85255e-06	0.000366672
ENSG00000102984.14,ZNF821,protein_coding	108.468	1.04225	1.08999	0.233267	4.46805	7.89341e-06	0.000368009
ENSG00000272405.1,RP11-284F21.10,antisense	133.856	-1.6782	-1.94186	0.375633	-4.46765	7.90843e-06	0.000368139
ENSG00000015171.18,ZMYND11,protein_coding	1175.24	0.698238	0.712609	0.156316	4.46682	7.93904e-06	0.000368994
ENSG00000204397.7,CARD16,protein_coding	42.3039	-1.6759	-1.88585	0.37523	-4.46632	7.95782e-06	0.000369297
ENSG00000102221.13,JADE3,protein_coding	290.776	1.00791	1.04945	0.225687	4.46596	7.97097e-06	0.000369338
ENSG00000163599.14,CTLA4,protein_coding	8.90061	-2.21399	-2.95616	0.495907	-4.46453	8.02464e-06	0.000370947
ENSG00000131381.12,RBSN,protein_coding	1393.22	0.54018	0.546548	0.120998	4.46437	8.03034e-06	0.000370947
ENSG00000053918.15,KCNQ1,protein_coding	95.3894	-1.331	-1.43634	0.298189	-4.46363	8.05816e-06	0.000371663
ENSG00000134594.4,RAB33A,protein_coding	42.3244	1.78515	2.07547	0.399976	4.46315	8.07649e-06	0.000371938
ENSG00000177363.4,LRRN4CL,protein_coding	97.9031	-1.42246	-1.55486	0.318808	-4.4618	8.12749e-06	0.000373403
ENSG00000167005.13,NUDT21,protein_coding	2187.78	0.693145	0.707003	0.155356	4.46165	8.1331e-06	0.000373403
ENSG00000272398.5,CD24,protein_coding	1045.94	1.88255	2.25674	0.422263	4.45825	8.26326e-06	0.000378226
ENSG00000105137.12,SYDE1,protein_coding	436.768	-0.926059	-0.957826	0.207713	-4.45835	8.25913e-06	0.000378226
ENSG00000161921.14,CXCL16,protein_coding	467.892	-1.20313	-1.27416	0.270058	-4.45508	8.38618e-06	0.00038327
ENSG00000259209.3,RP5-991G20.2,antisense	54.5254	1.31624	1.41253	0.295469	4.45475	8.39923e-06	0.000383285
ENSG00000228304.1,OR4K6P,unprocessed_pseudogene	15.4112	2.47033	8.94019	0.554617	4.45411	8.42411e-06	0.000383839
ENSG00000119686.9,FLVCR2,protein_coding	204.732	-1.38916	-1.51249	0.311961	-4.45299	8.46818e-06	0.000385264
ENSG00000138119.16,MYOF,protein_coding	1100.91	-1.12677	-1.1888	0.253078	-4.45227	8.49678e-06	0.000385982
ENSG00000197535.14,MYO5A,protein_coding	3226.04	0.807445	0.827532	0.181374	4.45181	8.51483e-06	0.00038622
ENSG00000072694.19,FCGR2B,protein_coding	208.892	-1.70089	-1.95688	0.382428	-4.44762	8.68277e-06	0.000393245
ENSG00000164327.12,RICTOR,protein_coding	1893.85	0.794671	0.814643	0.178696	4.44704	8.70599e-06	0.000393704
ENSG00000125266.6,EFNB2,protein_coding	827.214	-1.25054	-1.33519	0.281283	-4.44584	8.75509e-06	0.000394149
ENSG00000255987.1,TOMM20P2,processed_pseudogene	2.32481	-2.48891	-4.60997	0.559814	-4.44596	8.75019e-06	0.000394149
ENSG00000187135.7,VSTM2B,protein_coding	49.9653	2.35157	3.78776	0.528909	4.44608	8.74513e-06	0.000394149
ENSG00000169026.12,MFSD7,protein_coding	58.4035	-1.60792	-1.8123	0.36172	-4.4452	8.78117e-06	0.000394733
ENSG00000156711.16,MAPK13,protein_coding	180.233	-1.10093	-1.16107	0.247825	-4.44235	8.89823e-06	0.000399399
ENSG00000148680.15,HTR7,protein_coding	19.3975	-1.87338	-2.24993	0.422138	-4.43785	9.08614e-06	0.000407227
ENSG00000173846.12,PLK3,protein_coding	462.916	-1.10088	-1.15902	0.248123	-4.43684	9.12891e-06	0.000408435
ENSG00000142089.15,IFITM3,protein_coding	1086.73	-1.2776	-1.36026	0.287988	-4.4363	9.15168e-06	0.000408435
ENSG00000153982.10,GDPD1,protein_coding	191.088	1.18442	1.24839	0.266986	4.43625	9.15379e-06	0.000408435
ENSG00000006453.13,BAIAP2L1,protein_coding	17.5949	-1.92757	-2.38971	0.434662	-4.43465	9.22199e-06	0.000410013
ENSG00000120162.9,MOB3B,protein_coding	935.784	1.62845	1.85227	0.367226	4.43447	9.22999e-06	0.000410013
ENSG00000110057.7,UNC93B1,protein_coding	216.101	-1.27962	-1.37051	0.288555	-4.43459	9.22483e-06	0.000410013
ENSG00000173918.14,C1QTNF1,protein_coding	480.734	-1.38164	-1.48372	0.311628	-4.43363	9.2658e-06	0.000410998
ENSG00000244682.7,FCGR2C,polymorphic_pseudogene	523.515	-1.61471	-1.82341	0.364502	-4.42991	9.42705e-06	0.000417535
ENSG00000138061.11,CYP1B1,protein_coding	552.678	-2.01145	-2.56192	0.454094	-4.4296	9.44098e-06	0.000417538
ENSG00000150048.10,CLEC1A,protein_coding	48.9936	-1.64029	-1.86526	0.370666	-4.42525	9.63307e-06	0.000425409
ENSG00000006282.20,SPATA20,protein_coding	636.831	-1.2369	-1.31974	0.279572	-4.42425	9.67787e-06	0.000426761
ENSG00000127125.8,PPCS,protein_coding	248.421	-0.743246	-0.759148	0.168049	-4.4228	9.74309e-06	0.000429009
ENSG00000273216.1,AC002059.10,sense_intronic	14.6054	-1.52115	-1.71077	0.344055	-4.42126	9.81279e-06	0.000431448
ENSG00000135956.8,TMEM127,protein_coding	1309.14	-0.546805	-0.552825	0.1237	-4.42041	9.85152e-06	0.00043189
ENSG00000174600.13,CMKLR1,protein_coding	263.912	-1.56433	-1.75418	0.353885	-4.42046	9.84915e-06	0.00043189
ENSG00000092051.16,JPH4,protein_coding	449.948	1.70589	1.95633	0.386114	4.41809	9.95765e-06	0.000435908
ENSG00000132932.16,ATP8A2,protein_coding	144.899	2.17316	2.99544	0.491927	4.41766	9.97765e-06	0.000436149
ENSG00000149761.8,NUDT22,protein_coding	233.501	-0.889402	-0.917807	0.201371	-4.41673	1.00207e-05	0.000437397
ENSG00000183775.10,KCTD16,protein_coding	329.247	1.97259	2.37674	0.446823	4.41471	1.01146e-05	0.000440857
ENSG00000066651.17,TRMT11,protein_coding	225.532	0.850514	0.879799	0.19268	4.41413	1.01416e-05	0.000441393
ENSG00000259768.5,RP5-991G20.1,antisense	216.226	0.870991	0.896008	0.197354	4.41333	1.01791e-05	0.000442389
ENSG00000135316.17,SYNCRIP,protein_coding	3742.79	0.692039	0.707056	0.156825	4.4128	1.02044e-05	0.000442846
ENSG00000131979.18,GCH1,protein_coding	66.7115	-1.47484	-1.62422	0.33433	-4.41134	1.02731e-05	0.000445187
ENSG00000159216.18,RUNX1,protein_coding	1835.19	-1.43887	-1.58234	0.326288	-4.40982	1.03455e-05	0.000447679
ENSG00000125618.16,PAX8,protein_coding	55.3328	-1.71526	-2.04795	0.389334	-4.40563	1.05477e-05	0.000455125
ENSG00000159921.14,GNE,protein_coding	550.449	0.789271	0.81129	0.179146	4.40573	1.05429e-05	0.000455125
ENSG00000184068.2,RP5-821D11.7,antisense	7.77787	1.83983	2.26262	0.417665	4.40503	1.05771e-05	0.000455739
ENSG00000203288.3,RP11-98D18.9,antisense	19.2152	1.57696	1.77141	0.358125	4.40337	1.0658e-05	0.000458568
ENSG00000279743.1,CTB-43I4.1,TEC	13.1298	2.42777	4.43051	0.551409	4.40285	1.06836e-05	0.000459013
ENSG00000152932.7,RAB3C,protein_coding	477.271	2.23385	3.10247	0.507501	4.40166	1.07427e-05	0.00046029
ENSG00000113716.12,HMGXB3,protein_coding	1470.06	-0.652401	-0.663542	0.148218	-4.40163	1.07439e-05	0.00046029
ENSG00000237101.1,RP11-365O16.6,antisense	11.8794	1.7659	2.08358	0.40139	4.39946	1.08518e-05	0.000464255
ENSG00000150281.6,CTF1,protein_coding	33.2362	-1.4467	-1.59584	0.329015	-4.39707	1.09722e-05	0.000468739
ENSG00000174791.10,RIN1,protein_coding	264.267	-1.66166	-1.88997	0.377956	-4.39643	1.10044e-05	0.00046945
ENSG00000104447.11,TRPS1,protein_coding	2917.71	-0.790629	-0.811798	0.179861	-4.39578	1.10374e-05	0.000469526
ENSG00000070214.15,SLC44A1,protein_coding	4493.11	1.12786	1.19405	0.256576	4.39579	1.1037e-05	0.000469526
ENSG00000175505.10,CLCF1,protein_coding	145.359	-1.63916	-1.86809	0.37307	-4.39371	1.11432e-05	0.000473357
ENSG00000168679.17,SLC16A4,protein_coding	228.012	-1.27476	-1.36323	0.290197	-4.39275	1.11925e-05	0.000474783
ENSG00000125810.9,CD93,protein_coding	1413.39	-1.25812	-1.3498	0.286466	-4.39186	1.12383e-05	0.000476055
ENSG00000163071.10,SPATA18,protein_coding	102.281	-2.19451	-3.00267	0.499802	-4.39075	1.12959e-05	0.000477822
ENSG00000166503.8,RP11-382A20.3,protein_coding	1617.31	0.843975	0.869002	0.19239	4.38679	1.15033e-05	0.000485914
ENSG00000186017.14,ZNF566,protein_coding	714.581	0.876002	0.905381	0.199716	4.38625	1.15323e-05	0.000486456
ENSG00000256235.1,SMIM3,protein_coding	457.314	-1.54244	-1.69719	0.351703	-4.38564	1.15647e-05	0.000487139
ENSG00000226180.3,RP11-278A23.1,lincRNA	105.588	1.10421	1.1608	0.251817	4.38498	1.15999e-05	0.000487941
ENSG00000171227.6,TMEM37,protein_coding	51.6493	-1.51016	-1.688	0.344491	-4.38375	1.16655e-05	0.000488792
ENSG00000177108.5,ZDHHC22,protein_coding	287.057	1.91363	2.32608	0.436535	4.38369	1.16688e-05	0.000488792
ENSG00000161082.12,CELF5,protein_coding	262.045	1.84955	2.22876	0.421872	4.38414	1.16445e-05	0.000488792
ENSG00000136267.13,DGKB,protein_coding	699.953	1.77738	2.08731	0.405548	4.38266	1.1724e-05	0.000490423
ENSG00000081386.12,ZNF510,protein_coding	963.477	0.752559	0.770621	0.171743	4.38189	1.17655e-05	0.000490795
ENSG00000151240.16,DIP2C,protein_coding	1004.32	0.858597	0.886106	0.195936	4.38203	1.17577e-05	0.000490795
ENSG00000166801.15,FAM111A,protein_coding	1961.17	-0.891353	-0.922941	0.203441	-4.38137	1.17935e-05	0.000491282
ENSG00000136840.18,ST6GALNAC4,protein_coding	137.573	-0.948857	-0.984453	0.21664	-4.37987	1.18749e-05	0.000493989
ENSG00000115310.17,RTN4,protein_coding	4969.27	0.710328	0.725152	0.162217	4.37888	1.19289e-05	0.000495551
ENSG00000156531.16,PHF6,protein_coding	1040.37	0.758696	0.777324	0.173383	4.37584	1.20964e-05	0.000501816
ENSG00000144802.11,NFKBIZ,protein_coding	711.569	-1.35656	-1.47719	0.310199	-4.3732	1.2244e-05	0.000506547
ENSG00000185615.15,PDIA2,protein_coding	58.8515	2.08021	2.7681	0.475646	4.37344	1.22303e-05	0.000506547
ENSG00000138795.9,LEF1,protein_coding	385.931	-1.53178	-1.70481	0.350327	-4.37243	1.2287e-05	0.000506693
ENSG00000173530.5,TNFRSF10D,protein_coding	128.836	-1.36615	-1.48279	0.312481	-4.37194	1.23149e-05	0.000506693
ENSG00000125733.17,TRIP10,protein_coding	289.274	-0.940817	-0.977904	0.215175	-4.37234	1.22924e-05	0.000506693
ENSG00000270189.1,RP11-258C19.7,lincRNA	255.121	1.14659	1.21413	0.262244	4.37221	1.22993e-05	0.000506693
ENSG00000160345.12,C9orf116,protein_coding	26.9755	-1.39749	-1.52925	0.319676	-4.37158	1.23352e-05	0.000506836
ENSG00000117020.16,AKT3,protein_coding	2854.44	0.864342	0.891647	0.197742	4.37106	1.23646e-05	0.000507115
ENSG00000160796.16,NBEAL2,protein_coding	590.489	-1.05509	-1.10813	0.241392	-4.37086	1.23757e-05	0.000507115
ENSG00000146267.11,FAXC,protein_coding	399.454	1.31561	1.42555	0.301082	4.36962	1.24462e-05	0.00050914
ENSG00000182957.15,SPATA13,protein_coding	3019.82	-0.990083	-1.03068	0.226595	-4.3694	1.24589e-05	0.00050914
ENSG00000080493.13,SLC4A4,protein_coding	5674.58	-1.62531	-1.78011	0.372053	-4.36849	1.2511e-05	0.000509886
ENSG00000259666.2,LINGO1-AS1,antisense	23.8211	2.06824	2.69992	0.473418	4.36873	1.2497e-05	0.000509886
ENSG00000227455.2,RP11-300M24.1,lincRNA	15.8388	2.17652	3.06128	0.498465	4.36645	1.26283e-05	0.00051328
ENSG00000260249.2,RP11-401P9.5,antisense	144.027	1.83433	2.18534	0.420082	4.36661	1.26191e-05	0.00051328
ENSG00000121957.12,GPSM2,protein_coding	1351.24	1.28306	1.38909	0.293968	4.36464	1.27333e-05	0.000516849
ENSG00000069943.9,PIGB,protein_coding	148.923	-0.917086	-0.949893	0.21015	-4.36395	1.27734e-05	0.000517084
ENSG00000172349.16,IL16,protein_coding	194.811	-1.26198	-1.35581	0.289176	-4.36405	1.27678e-05	0.000517084
ENSG00000224596.7,ZMIZ1-AS1,antisense	38.4261	-1.61037	-1.83254	0.369074	-4.36327	1.28132e-05	0.000517996
ENSG00000163520.13,FBLN2,protein_coding	149.419	-2.10443	-2.73135	0.482513	-4.3614	1.29233e-05	0.000521747
ENSG00000164175.14,SLC45A2,protein_coding	22.9893	1.90051	2.33987	0.435823	4.36075	1.29616e-05	0.000522595
ENSG00000054967.12,RELT,protein_coding	512.535	-0.77226	-0.792232	0.177154	-4.35925	1.30509e-05	0.000525489
ENSG00000241058.3,NSUN6,protein_coding	266.29	0.983238	1.02487	0.225616	4.35801	1.31251e-05	0.000527068
ENSG00000185522.8,LMNTD2,protein_coding	12.6449	-1.95777	-2.43075	0.449229	-4.35807	1.31213e-05	0.000527068
ENSG00000134250.17,NOTCH2,protein_coding	5855.91	-0.58669	-0.594637	0.134635	-4.35762	1.31487e-05	0.000527312
ENSG00000125089.16,SH3TC1,protein_coding	532.437	-1.3206	-1.43318	0.303109	-4.35684	1.31953e-05	0.000528478
ENSG00000205809.9,KLRC2,protein_coding	145.45	2.44639	3.98729	0.561772	4.35479	1.33197e-05	0.000532753
ENSG00000225217.1,HSPA7,unprocessed_pseudogene	255.731	-1.648	-1.88143	0.378541	-4.35356	1.33943e-05	0.000535025
ENSG00000175928.5,LRRN1,protein_coding	1385.75	1.30069	1.40747	0.29882	4.35276	1.34433e-05	0.000535864
ENSG00000168152.12,THAP9,protein_coding	202.224	0.806707	0.829265	0.185338	4.35264	1.34509e-05	0.000535864
ENSG00000197372.9,ZNF675,protein_coding	424.562	0.788226	0.808799	0.181141	4.35145	1.3524e-05	0.000538065
ENSG00000075340.22,ADD2,protein_coding	2203.3	1.02687	1.07398	0.236015	4.35088	1.35594e-05	0.000538763
ENSG00000070159.13,PTPN3,protein_coding	221.459	-2.03133	-2.57312	0.466922	-4.35048	1.35839e-05	0.000539026
ENSG00000132530.16,XAF1,protein_coding	2132.62	-1.52447	-1.70667	0.350467	-4.34982	1.36252e-05	0.000539954
ENSG00000106991.13,ENG,protein_coding	745.561	-1.2338	-1.32094	0.283676	-4.34932	1.36558e-05	0.000540454
ENSG00000143315.6,PIGM,protein_coding	481.218	0.758138	0.776389	0.174356	4.34823	1.37243e-05	0.000541031
ENSG00000134516.15,DOCK2,protein_coding	546.678	-1.21723	-1.30149	0.279935	-4.34827	1.37218e-05	0.000541031
ENSG00000139832.4,RAB20,protein_coding	100.813	-1.26775	-1.3559	0.291525	-4.34868	1.36961e-05	0.000541031
ENSG00000173040.12,EVC2,protein_coding	165.872	-1.62307	-1.87863	0.373383	-4.34692	1.38064e-05	0.000541762
ENSG00000186868.15,MAPT,protein_coding	2509.03	1.31452	1.42192	0.302404	4.34689	1.38081e-05	0.000541762
ENSG00000254004.6,ZNF260,protein_coding	1305.34	0.699178	0.714556	0.16082	4.34758	1.37646e-05	0.000541762
ENSG00000172216.5,CEBPB,protein_coding	355.135	-1.16141	-1.23067	0.267188	-4.34678	1.38148e-05	0.000541762
ENSG00000146350.13,TBC1D32,protein_coding	415.945	0.93285	0.968108	0.214645	4.34602	1.38631e-05	0.000542244
ENSG00000224729.5,PCOLCE-AS1,antisense	24.1144	-1.70043	-1.97094	0.391255	-4.34609	1.38587e-05	0.000542244
ENSG00000170100.13,ZNF778,protein_coding	629.962	0.711426	0.726671	0.163739	4.34489	1.39348e-05	0.000544341
ENSG00000137726.16,FXYD6,protein_coding	2994.56	1.20292	1.28931	0.276894	4.34435	1.39687e-05	0.000544961
ENSG00000182568.16,SATB1,protein_coding	1050.94	1.02354	1.06691	0.235625	4.34394	1.39948e-05	0.000545271
ENSG00000182348.6,ZNF804B,protein_coding	18.5504	2.34023	3.71931	0.538805	4.34337	1.40311e-05	0.000545598
ENSG00000089820.15,ARHGAP4,protein_coding	377.341	-1.05045	-1.10406	0.241857	-4.34324	1.40394e-05	0.000545598
ENSG00000267317.2,CTB-25B13.12,antisense	65.3777	-0.976134	-1.02092	0.224773	-4.34276	1.40706e-05	0.000546106
ENSG00000175489.9,LRRC25,protein_coding	78.0846	-1.3151	-1.42462	0.302944	-4.34105	1.418e-05	0.000548939
ENSG00000126950.7,TMEM35,protein_coding	108.923	1.72433	2.01849	0.397193	4.34129	1.41648e-05	0.000548939
ENSG00000135747.11,ZNF670-ZNF695,protein_coding	8.68977	2.20002	2.96456	0.506837	4.34069	1.42039e-05	0.000549157
ENSG00000188828.11,GLRA4,protein_coding	3.72881	2.26903	4.34841	0.522848	4.33975	1.42643e-05	0.000550786
ENSG00000143702.15,CEP170,protein_coding	3898.53	0.618113	0.628256	0.142543	4.33631	1.44893e-05	0.000558751
ENSG00000087589.16,CASS4,protein_coding	66.3727	-1.48655	-1.65499	0.342837	-4.33603	1.45077e-05	0.000558751
ENSG00000134317.17,GRHL1,protein_coding	105.665	1.39246	1.51712	0.321186	4.33538	1.45509e-05	0.0005597
ENSG00000114631.10,PODXL2,protein_coding	456.008	1.34658	1.47203	0.310661	4.33456	1.46054e-05	0.00056108
ENSG00000100385.13,IL2RB,protein_coding	34.6339	-1.73787	-2.03313	0.401109	-4.33267	1.47311e-05	0.000565185
ENSG00000111911.6,HINT3,protein_coding	602.69	0.930352	0.972153	0.214744	4.33238	1.47507e-05	0.000565219
ENSG00000001497.16,LAS1L,protein_coding	854.84	0.625347	0.63527	0.144353	4.33205	1.47725e-05	0.000565333
ENSG00000115919.14,KYNU,protein_coding	134.769	-1.27653	-1.37932	0.294806	-4.33005	1.49075e-05	0.000567616
ENSG00000135437.9,RDH5,protein_coding	156.101	-1.16658	-1.23215	0.269409	-4.33017	1.48997e-05	0.000567616
ENSG00000136158.10,SPRY2,protein_coding	1660.11	-1.28257	-1.36334	0.296153	-4.33076	1.48596e-05	0.000567616
ENSG00000166979.12,EVA1C,protein_coding	336.322	-1.21477	-1.29996	0.280536	-4.33017	1.48997e-05	0.000567616
ENSG00000157782.9,CABP1,protein_coding	105.207	1.89072	2.24869	0.436698	4.32958	1.49394e-05	0.000568111
ENSG00000262223.6,RP11-1055B8.3,lincRNA	35.9079	1.89299	2.30475	0.437296	4.32885	1.4989e-05	0.000569281
ENSG00000272958.1,CMP21-97G8.2,lincRNA	3.56959	2.17383	3.27238	0.502212	4.3285	1.50127e-05	0.000569463
ENSG00000171735.18,CAMTA1,protein_coding	899.024	0.99002	1.03468	0.228764	4.3277	1.50677e-05	0.000570828
ENSG00000109854.13,HTATIP2,protein_coding	93.2538	-1.33785	-1.45609	0.30916	-4.32737	1.509e-05	0.000570956
ENSG00000256139.2,RP11-968O1.5,sense_overlapping	18.9764	-1.43703	-1.58399	0.332106	-4.32703	1.51134e-05	0.000571125
ENSG00000134376.14,CRB1,protein_coding	1308.04	1.60029	1.81164	0.370034	4.3247	1.52739e-05	0.000576467
ENSG00000270933.1,CTD-2227E11.1,lincRNA	18.2351	-1.78833	-2.19924	0.413698	-4.3228	1.54062e-05	0.000580732
ENSG00000171502.14,COL24A1,protein_coding	106.675	-1.92155	-2.37372	0.444605	-4.32192	1.54676e-05	0.000581191
ENSG00000124380.10,SNRNP27,protein_coding	396.687	0.693373	0.70816	0.160429	4.322	1.54618e-05	0.000581191
ENSG00000234999.1,SNRPCP19,processed_pseudogene	7.67692	-1.99577	-2.54104	0.461791	-4.3218	1.54763e-05	0.000581191
ENSG00000170464.9,DNAJC18,protein_coding	640.012	0.618401	0.628639	0.143124	4.32074	1.55505e-05	0.000582527
ENSG00000101916.11,TLR8,protein_coding	42.9482	-1.82463	-2.18508	0.42229	-4.32081	1.55455e-05	0.000582527
ENSG00000021574.11,SPAST,protein_coding	726.905	0.915293	0.951975	0.211877	4.31993	1.56076e-05	0.000583042
ENSG00000230438.6,SERPINB9P1,lincRNA	17.9016	-1.88641	-2.46309	0.436724	-4.31945	1.56418e-05	0.000583042
ENSG00000148143.12,ZNF462,protein_coding	4137.11	0.739952	0.756811	0.171305	4.31949	1.56389e-05	0.000583042
ENSG00000107984.9,DKK1,protein_coding	55.0865	-2.39918	-3.98359	0.555399	-4.31974	1.56215e-05	0.000583042
ENSG00000118160.13,SLC8A2,protein_coding	69.726	2.07505	2.7144	0.480557	4.318	1.57446e-05	0.000586151
ENSG00000160856.20,FCRL3,protein_coding	5.07968	-2.21942	-3.17969	0.514169	-4.31651	1.58513e-05	0.000588299
ENSG00000168421.12,RHOH,protein_coding	26.8721	-1.4118	-1.55197	0.327069	-4.31651	1.58518e-05	0.000588299
ENSG00000112936.18,C7,protein_coding	295.559	-2.30664	-3.57041	0.534392	-4.31638	1.58609e-05	0.000588299
ENSG00000152104.11,PTPN14,protein_coding	1571.5	-0.892208	-0.921433	0.206759	-4.31521	1.59452e-05	0.000590697
ENSG00000072818.11,ACAP1,protein_coding	37.3422	-1.58203	-1.79175	0.366659	-4.31472	1.59806e-05	0.000591281
ENSG00000142494.13,SLC47A1,protein_coding	88.9992	-1.65663	-1.90497	0.384026	-4.31384	1.60443e-05	0.00059291
ENSG00000130202.9,PVRL2,protein_coding	429.734	-1.23458	-1.32225	0.286422	-4.31037	1.62983e-05	0.000601559
ENSG00000183853.17,KIRREL,protein_coding	1422.51	-1.01537	-1.06262	0.235687	-4.30815	1.64629e-05	0.00060689
ENSG00000203930.10,LINC00632,lincRNA	221.241	2.27764	3.52442	0.52897	4.30581	1.66374e-05	0.000612574
ENSG00000163590.13,PPM1L,protein_coding	1267.43	1.03996	1.09136	0.241589	4.30466	1.67242e-05	0.000615018
ENSG00000155465.18,SLC7A7,protein_coding	158.442	-1.13363	-1.20005	0.263375	-4.30425	1.67553e-05	0.000615412
ENSG00000187773.8,FAM69C,protein_coding	306.54	1.42331	1.57026	0.330767	4.30307	1.68445e-05	0.000617932
ENSG00000115947.13,ORC4,protein_coding	707.153	0.638169	0.649534	0.148319	4.30269	1.68734e-05	0.000618239
ENSG00000042286.14,AIFM2,protein_coding	127.066	-1.03017	-1.0809	0.239459	-4.30208	1.69202e-05	0.0006192
ENSG00000168283.13,BMI1,protein_coding	820.288	0.861439	0.891124	0.200258	4.30165	1.69528e-05	0.000619641
ENSG00000113555.5,PCDH12,protein_coding	192.236	-1.28695	-1.39104	0.299196	-4.30138	1.69741e-05	0.00061967
ENSG00000144810.15,COL8A1,protein_coding	1361.9	-2.09841	-2.81271	0.488035	-4.29973	1.71009e-05	0.000623542
ENSG00000130338.12,TULP4,protein_coding	2613.09	0.787223	0.809194	0.183105	4.2993	1.71337e-05	0.000623982
ENSG00000107771.15,CCSER2,protein_coding	1696.95	0.664889	0.677155	0.154684	4.29837	1.72056e-05	0.000625842
ENSG00000124882.3,EREG,protein_coding	18.6943	-2.10848	-2.78631	0.490744	-4.2965	1.73517e-05	0.000629589
ENSG00000135424.15,ITGA7,protein_coding	2843.04	-1.27367	-1.37406	0.296464	-4.29619	1.73757e-05	0.000629589
ENSG00000198673.10,FAM19A2,protein_coding	78.7769	1.30588	1.39812	0.303977	4.29598	1.73922e-05	0.000629589
ENSG00000279135.1,RP11-261P13.5,TEC	46.9489	1.58532	1.79189	0.36897	4.29661	1.73431e-05	0.000629589
ENSG00000152382.5,TADA1,protein_coding	300.436	0.652909	0.666745	0.152036	4.29444	1.75134e-05	0.000631699
ENSG00000075884.12,ARHGAP15,protein_coding	116.152	-1.20762	-1.29306	0.281202	-4.29449	1.75099e-05	0.000631699
ENSG00000185361.8,TNFAIP8L1,protein_coding	299.052	-1.0362	-1.08799	0.241271	-4.29476	1.74882e-05	0.000631699
ENSG00000100146.16,SOX10,protein_coding	721.572	2.36436	4.03428	0.550626	4.29394	1.75529e-05	0.000632366
ENSG00000223865.10,HLA-DPB1,protein_coding	610.498	-1.4694	-1.6346	0.342348	-4.29213	1.7697e-05	0.000636796
ENSG00000164300.15,SERINC5,protein_coding	2592.26	1.0767	1.13532	0.250894	4.29144	1.77519e-05	0.000638008
ENSG00000151320.10,AKAP6,protein_coding	2749.61	1.0428	1.0947	0.243066	4.29019	1.78516e-05	0.000640066
ENSG00000269834.5,ZNF528-AS1,processed_transcript	452.801	1.13988	1.20986	0.265679	4.29042	1.78336e-05	0.000640066
ENSG00000115365.11,LANCL1,protein_coding	1719.77	0.825763	0.852325	0.192499	4.28971	1.78908e-05	0.000640707
ENSG00000104518.10,GSDMD,protein_coding	271.508	-1.45077	-1.60242	0.338228	-4.28931	1.79227e-05	0.000641087
ENSG00000129467.13,ADCY4,protein_coding	163.751	-1.41136	-1.55607	0.329081	-4.2888	1.79638e-05	0.000641796
ENSG00000233038.5,AC011899.9,antisense	33.3108	-1.5856	-1.80375	0.370005	-4.28535	1.82454e-05	0.000651086
ENSG00000037897.16,METTL1,protein_coding	757.436	2.04456	2.47023	0.477143	4.28501	1.82734e-05	0.00065131
ENSG00000085433.15,WDR47,protein_coding	844.142	0.734079	0.753074	0.17137	4.2836	1.83892e-05	0.00065448
ENSG00000171451.13,DSEL,protein_coding	4116.93	1.13824	1.21447	0.265733	4.2834	1.84058e-05	0.00065448
ENSG00000231252.2,RP11-436K8.1,lincRNA	540.024	1.77605	2.118	0.41472	4.28252	1.84786e-05	0.000655516
ENSG00000183801.7,OLFML1,protein_coding	45.9742	-1.51637	-1.69764	0.354105	-4.28226	1.85002e-05	0.000655516
ENSG00000110031.12,LPXN,protein_coding	199.714	-0.756597	-0.776078	0.176678	-4.28236	1.84922e-05	0.000655516
ENSG00000018280.16,SLC11A1,protein_coding	1619.51	-1.2752	-1.37778	0.297837	-4.28153	1.85615e-05	0.000656916
ENSG00000085788.13,DDHD2,protein_coding	1381.85	0.656452	0.669154	0.15336	4.28047	1.865e-05	0.000659272
ENSG00000260455.1,NBAT1,lincRNA	28.4043	1.80716	2.15768	0.42233	4.27902	1.8772e-05	0.00066135
ENSG00000066084.12,DIP2B,protein_coding	2544.53	0.572807	0.581463	0.13385	4.27946	1.87347e-05	0.00066135
ENSG00000064787.12,BCAS1,protein_coding	1104.26	2.24705	3.32217	0.525136	4.27899	1.87746e-05	0.00066135
ENSG00000001167.14,NFYA,protein_coding	653.329	0.560389	0.568356	0.131085	4.275	1.9114e-05	0.000672517
ENSG00000165997.4,ARL5B,protein_coding	865.781	0.933223	0.970761	0.218344	4.2741	1.91912e-05	0.000674448
ENSG00000133067.17,LGR6,protein_coding	95.5572	-2.23668	-3.35401	0.523445	-4.27299	1.92871e-05	0.000677026
ENSG00000140807.5,NKD1,protein_coding	1420.86	1.50898	1.69269	0.353209	4.2722	1.93555e-05	0.000678637
ENSG00000138131.3,LOXL4,protein_coding	41.3497	-1.68813	-1.9803	0.395241	-4.27114	1.94479e-05	0.000681082
ENSG00000169122.11,FAM110B,protein_coding	506.84	0.933647	0.972486	0.218724	4.26861	1.96691e-05	0.00068803
ENSG00000204366.3,ZBTB12,protein_coding	68.3604	0.980035	1.02168	0.229658	4.26738	1.97786e-05	0.000691057
ENSG00000186687.15,LYRM7,protein_coding	768.678	0.700636	0.715902	0.164217	4.26653	1.98536e-05	0.000692876
ENSG00000249459.8,ZNF286B,protein_coding	300.813	1.17586	1.25601	0.275651	4.26576	1.99227e-05	0.00069448
ENSG00000004487.15,KDM1A,protein_coding	1242.16	0.920358	0.958072	0.215829	4.26428	2.00545e-05	0.000698268
ENSG00000163297.16,ANTXR2,protein_coding	407.538	-1.14033	-1.22363	0.267471	-4.26337	2.01362e-05	0.000700303
ENSG00000175183.9,CSRP2,protein_coding	1180.11	-1.28369	-1.36652	0.301184	-4.26213	2.02489e-05	0.000703183
ENSG00000261685.2,RP11-401P9.4,lincRNA	511.988	1.63484	1.88621	0.38359	4.26194	2.02657e-05	0.000703183
ENSG00000164877.18,MICALL2,protein_coding	2253.08	-1.26318	-1.36439	0.296442	-4.26114	2.03387e-05	0.000704225
ENSG00000100298.15,APOBEC3H,protein_coding	2.52388	-2.24776	-3.22571	0.527507	-4.2611	2.03425e-05	0.000704225
ENSG00000189367.14,KIAA0408,protein_coding	915.966	1.35602	1.48138	0.318318	4.25994	2.04477e-05	0.000706244
ENSG00000141506.13,PIK3R5,protein_coding	281.682	-1.36071	-1.491	0.319403	-4.26016	2.0428e-05	0.000706244
ENSG00000138080.13,EMILIN1,protein_coding	752.57	-1.61616	-1.86233	0.379665	-4.25679	2.07379e-05	0.000714628
ENSG00000151062.14,CACNA2D4,protein_coding	65.8766	-1.09989	-1.16658	0.258371	-4.25701	2.07183e-05	0.000714628
ENSG00000170802.15,FOXN2,protein_coding	1104.46	0.812459	0.838639	0.19095	4.25483	2.09209e-05	0.00072011
ENSG00000101489.19,CELF4,protein_coding	200.839	2.03784	2.64431	0.479338	4.25136	2.12473e-05	0.000730509
ENSG00000197360.9,ZNF98,protein_coding	17.9624	2.38118	4.95349	0.560245	4.25025	2.13532e-05	0.000733314
ENSG00000256771.2,ZNF253,protein_coding	723.366	0.959602	1.0019	0.225812	4.24957	2.1418e-05	0.000734702
ENSG00000111666.10,CHPT1,protein_coding	1050.02	-0.844471	-0.869958	0.198751	-4.24889	2.14836e-05	0.000736111
ENSG00000269919.1,RP1-134E15.3,sense_intronic	5.78103	-2.06013	-2.78508	0.484893	-4.24863	2.15084e-05	0.000736124
ENSG00000116819.6,TFAP2E,protein_coding	48.7604	1.59376	1.87731	0.375293	4.2467	2.16942e-05	0.000737566
ENSG00000164692.17,COL1A2,protein_coding	7490.21	-1.98619	-2.5395	0.467623	-4.24742	2.16251e-05	0.000737566
ENSG00000100852.12,ARHGAP5,protein_coding	5138.87	0.674724	0.688112	0.158875	4.24689	2.16757e-05	0.000737566
ENSG00000269421.1,ZNF92P3,unprocessed_pseudogene	10.3597	1.99871	2.60539	0.470529	4.2478	2.1588e-05	0.000737566
ENSG00000100368.13,CSF2RB,protein_coding	128.223	-1.3401	-1.46389	0.315521	-4.24726	2.16403e-05	0.000737566
ENSG00000130829.17,DUSP9,protein_coding	8.95259	2.1532	3.04693	0.507032	4.24667	2.16974e-05	0.000737566
ENSG00000162576.16,MXRA8,protein_coding	557.897	-1.51739	-1.7046	0.357443	-4.24513	2.18463e-05	0.000741791
ENSG00000074047.20,GLI2,protein_coding	348.062	-1.09479	-1.1604	0.257963	-4.244	2.19568e-05	0.000743864
ENSG00000213977.7,TAX1BP3,protein_coding	438.057	-0.968678	-1.01127	0.228237	-4.24419	2.19388e-05	0.000743864
ENSG00000106701.11,FSD1L,protein_coding	722.7	1.01206	1.0605	0.238584	4.24193	2.21608e-05	0.000749459
ENSG00000142347.16,MYO1F,protein_coding	467.378	-1.12594	-1.19609	0.265438	-4.24182	2.21717e-05	0.000749459
ENSG00000198513.11,ATL1,protein_coding	165.841	1.00949	1.05892	0.23804	4.24083	2.22691e-05	0.000750609
ENSG00000169410.9,PTPN9,protein_coding	1020.79	-0.890538	-0.923242	0.209998	-4.2407	2.22828e-05	0.000750609
ENSG00000051523.10,CYBA,protein_coding	275.982	-1.18105	-1.26234	0.278506	-4.24068	2.22846e-05	0.000750609
ENSG00000108309.12,RUNDC3A,protein_coding	305.219	1.66905	1.92209	0.393601	4.24047	2.23054e-05	0.000750609
ENSG00000264575.1,LINC00526,lincRNA	34.52	1.28191	1.40177	0.302388	4.23928	2.24235e-05	0.000753076
ENSG00000171587.14,DSCAM,protein_coding	879.516	1.49089	1.6667	0.351688	4.23923	2.24288e-05	0.000753076
ENSG00000130775.15,THEMIS2,protein_coding	453.459	-1.37989	-1.51654	0.325551	-4.23864	2.24877e-05	0.000753375
ENSG00000152409.8,JMY,protein_coding	1063.59	0.726298	0.744483	0.17135	4.23867	2.24846e-05	0.000753375
ENSG00000179542.15,SLITRK4,protein_coding	66.4854	2.14387	2.97446	0.50625	4.23481	2.28743e-05	0.000765476
ENSG00000249550.6,LINC01234,lincRNA	16.9339	2.22281	3.3069	0.525101	4.23312	2.30472e-05	0.000770406
ENSG00000171681.12,ATF7IP,protein_coding	5007.79	0.684724	0.698598	0.161779	4.23247	2.31137e-05	0.000771772
ENSG00000235628.1,TNR-IT1,sense_intronic	10.0826	2.24014	3.38334	0.529399	4.23147	2.32166e-05	0.000773494
ENSG00000255571.6,MIR9-3HG,lincRNA	1389.34	1.75305	2.09148	0.414279	4.23158	2.3206e-05	0.000773494
ENSG00000197249.12,SERPINA1,protein_coding	221.215	-1.29329	-1.39553	0.305734	-4.23012	2.33562e-05	0.000777286
ENSG00000260903.2,XKR7,protein_coding	77.3218	2.21415	3.27382	0.523517	4.22937	2.34349e-05	0.000779041
ENSG00000105835.11,NAMPT,protein_coding	7421.08	-1.36877	-1.4925	0.323799	-4.22722	2.366e-05	0.000782209
ENSG00000166444.17,ST5,protein_coding	1594.64	-0.744209	-0.76341	0.176049	-4.2273	2.36517e-05	0.000782209
ENSG00000267554.1,RP11-686D22.10,processed_pseudogene	4.81269	-2.11675	-2.9225	0.500706	-4.22754	2.36256e-05	0.000782209
ENSG00000277363.4,SRCIN1,protein_coding	710.461	1.46657	1.63875	0.346904	4.2276	2.36198e-05	0.000782209
ENSG00000228933.7,RP11-268G12.1,lincRNA	22.1158	2.29206	3.10452	0.542158	4.22767	2.36127e-05	0.000782209
ENSG00000019169.10,MARCO,protein_coding	29.5865	-2.15104	-2.92829	0.508927	-4.22662	2.37232e-05	0.000783437
ENSG00000196440.11,ARMCX4,protein_coding	1084.36	0.814922	0.838576	0.192849	4.22569	2.38207e-05	0.000785798
ENSG00000280434.1,RP4-671O14.6,sense_overlapping	243.687	-1.2373	-1.3325	0.292855	-4.22495	2.38989e-05	0.000787513
ENSG00000188501.11,LCTL,protein_coding	67.1239	-1.40186	-1.54472	0.331942	-4.22322	2.4084e-05	0.000791881
ENSG00000125821.11,DTD1,protein_coding	351.903	0.820824	0.84718	0.194351	4.22342	2.4062e-05	0.000791881
ENSG00000166349.9,RAG1,protein_coding	40.7077	-1.43904	-1.5998	0.340823	-4.22226	2.41869e-05	0.000793531
ENSG00000158104.11,HPD,protein_coding	19.8346	-2.03561	-2.66197	0.482091	-4.22245	2.41658e-05	0.000793531
ENSG00000168056.14,LTBP3,protein_coding	3432.48	-0.890548	-0.923606	0.210978	-4.22105	2.43162e-05	0.00079522
ENSG00000140575.12,IQGAP1,protein_coding	4005.44	-0.950133	-0.98584	0.225084	-4.22123	2.4297e-05	0.00079522
ENSG00000231154.1,MORF4L2-AS1,antisense	48.6451	1.35691	1.48318	0.321464	4.22104	2.43176e-05	0.00079522
ENSG00000197496.5,SLC2A10,protein_coding	456.102	-1.09241	-1.15913	0.258906	-4.21931	2.45046e-05	0.000800467
ENSG00000156675.15,RAB11FIP1,protein_coding	113.047	-1.36204	-1.49442	0.32285	-4.21881	2.45596e-05	0.000801122
ENSG00000108349.14,CASC3,protein_coding	2088.67	0.581614	0.590261	0.137868	4.21864	2.45779e-05	0.000801122
ENSG00000176406.20,RIMS2,protein_coding	298.135	1.8361	2.19684	0.43536	4.21742	2.47115e-05	0.000804607
ENSG00000279708.1,CTD-2335A18.2,TEC	5.41391	2.0457	2.83514	0.485283	4.21549	2.4924e-05	0.000810649
ENSG00000122778.9,KIAA1549,protein_coding	1661.6	1.18515	1.2647	0.28123	4.21417	2.50695e-05	0.000813794
ENSG00000131323.14,TRAF3,protein_coding	693.33	-0.673966	-0.688121	0.15993	-4.21413	2.50747e-05	0.000813794
ENSG00000172775.16,FAM192A,protein_coding	1034.05	0.612684	0.622933	0.145398	4.21383	2.51075e-05	0.000813979
ENSG00000187695.6,RP11-723O4.6,protein_coding	7.11483	-2.3369	-4.03535	0.554788	-4.21225	2.52845e-05	0.000818531
ENSG00000172819.16,RARG,protein_coding	200.6	-1.066	-1.12424	0.253095	-4.21184	2.53294e-05	0.000818531
ENSG00000089041.16,P2RX7,protein_coding	1133.34	1.49905	1.68197	0.355906	4.21192	2.53211e-05	0.000818531
ENSG00000197635.9,DPP4,protein_coding	145.559	-1.85327	-2.29669	0.440098	-4.21104	2.54194e-05	0.000818802
ENSG00000279455.1,RP11-495K9.10,TEC	1.40812	2.36173	6.74261	0.560833	4.21111	2.54118e-05	0.000818802
ENSG00000188051.6,TMEM221,protein_coding	22.9199	-1.76664	-2.07442	0.419482	-4.21149	2.53692e-05	0.000818802
ENSG00000140479.16,PCSK6,protein_coding	515.933	2.23347	3.29213	0.530488	4.21022	2.55124e-05	0.000820922
ENSG00000139800.8,ZIC5,protein_coding	111.931	-1.66493	-1.90362	0.395725	-4.20728	2.58461e-05	0.00083077
ENSG00000134955.11,SLC37A2,protein_coding	233.475	-1.25203	-1.35253	0.297659	-4.20626	2.5963e-05	0.00083275
ENSG00000248905.8,FMN1,protein_coding	673.728	-1.33449	-1.46048	0.31726	-4.20629	2.59598e-05	0.00083275
ENSG00000139329.4,LUM,protein_coding	221.608	-1.98787	-2.54829	0.47294	-4.20323	2.63136e-05	0.0008431
ENSG00000165891.15,E2F7,protein_coding	374.47	-1.39428	-1.54302	0.33189	-4.20102	2.65712e-05	0.000847856
ENSG00000125384.6,PTGER2,protein_coding	8.50041	-2.12353	-2.94837	0.505446	-4.20129	2.65396e-05	0.000847856
ENSG00000128394.16,APOBEC3F,protein_coding	67.7355	-1.38713	-1.5343	0.330151	-4.20148	2.6517e-05	0.000847856
ENSG00000147044.20,CASK,protein_coding	2040.96	0.88668	0.922058	0.211064	4.20099	2.65747e-05	0.000847856
ENSG00000090020.10,SLC9A1,protein_coding	519.879	-0.730331	-0.74961	0.173888	-4.2	2.6691e-05	0.000849766
ENSG00000157077.14,ZFYVE9,protein_coding	932.341	0.60149	0.612102	0.143206	4.20019	2.66697e-05	0.000849766
ENSG00000261678.2,SCRT1,protein_coding	97.4229	2.17909	3.22459	0.518861	4.19975	2.67213e-05	0.000849832
ENSG00000232044.6,LINC01105,processed_transcript	871.353	2.04232	2.75344	0.486351	4.19928	2.67766e-05	0.000850693
ENSG00000270638.1,RP3-466P17.1,lincRNA	38.5713	1.4477	1.63919	0.344809	4.19855	2.68624e-05	0.000851624
ENSG00000174721.9,FGFBP3,protein_coding	106.04	1.36748	1.51107	0.325692	4.1987	2.68454e-05	0.000851624
ENSG00000140718.18,FTO,protein_coding	1558.36	0.535624	0.542627	0.127608	4.19743	2.69963e-05	0.000854968
ENSG00000234690.6,AC073283.4,lincRNA	61.3126	1.58986	1.81668	0.378982	4.19509	2.72764e-05	0.000862024
ENSG00000186106.11,ANKRD46,protein_coding	413.176	0.837277	0.863078	0.199577	4.19525	2.72566e-05	0.000862024
ENSG00000185499.16,MUC1,protein_coding	272.392	-1.11107	-1.18381	0.26489	-4.19446	2.73518e-05	0.000863503
ENSG00000165646.11,SLC18A2,protein_coding	8.47603	-2.28038	-3.2071	0.543777	-4.1936	2.7456e-05	0.000865885
ENSG00000120333.4,MRPS14,protein_coding	565.14	0.673717	0.690541	0.160722	4.19181	2.76736e-05	0.000871833
ENSG00000211699.2,TRGV3,TR_V_gene	1.47193	-2.35038	-4.50367	0.560746	-4.19153	2.77084e-05	0.000872018
ENSG00000072133.10,RPS6KA6,protein_coding	104.669	2.01961	2.7104	0.481977	4.19027	2.78626e-05	0.000875957
ENSG00000165762.2,OR4K2,protein_coding	2.61826	2.29507	7.68239	0.54794	4.18854	2.80758e-05	0.000881738
ENSG00000197927.12,C2orf27A,transcribed_unprocessed_pseudogene	86.2336	1.27361	1.37114	0.30412	4.18787	2.81585e-05	0.000883414
ENSG00000115368.9,WDR75,protein_coding	666.003	0.481832	0.487237	0.115075	4.1871	2.82537e-05	0.000885479
ENSG00000220517.2,ASS1P1,processed_pseudogene	7.53121	-2.34121	-4.98856	0.559183	-4.18684	2.82867e-05	0.00088559
ENSG00000101180.15,HRH3,protein_coding	15.2439	2.27949	3.65782	0.544503	4.18636	2.83465e-05	0.000886541
ENSG00000117226.11,GBP3,protein_coding	423.716	-1.35265	-1.48482	0.323148	-4.18584	2.84112e-05	0.000887645
ENSG00000186469.8,GNG2,protein_coding	1643.79	1.28976	1.39322	0.308288	4.18362	2.86904e-05	0.000895437
ENSG00000163131.10,CTSS,protein_coding	529.538	-1.39856	-1.54811	0.334497	-4.18108	2.90134e-05	0.000903645
ENSG00000013563.13,DNASE1L1,protein_coding	198.859	-0.946727	-0.990418	0.226424	-4.18121	2.89962e-05	0.000903645
ENSG00000102034.16,ELF4,protein_coding	197.237	-1.15605	-1.22688	0.276558	-4.18015	2.91322e-05	0.00090641
ENSG00000120137.6,PANK3,protein_coding	4037.91	0.651191	0.664674	0.155802	4.1796	2.92021e-05	0.000906723
ENSG00000177599.12,ZNF491,protein_coding	201.386	1.16435	1.24491	0.278578	4.1796	2.92025e-05	0.000906723
ENSG00000127418.14,FGFRL1,protein_coding	736.304	-1.40158	-1.54179	0.335367	-4.17926	2.92464e-05	0.000907151
ENSG00000104894.11,CD37,protein_coding	156.46	-1.25717	-1.36128	0.300886	-4.17823	2.93792e-05	0.000910333
ENSG00000108846.15,ABCC3,protein_coding	2589.2	-1.71581	-2.01485	0.410732	-4.17745	2.948e-05	0.000912518
ENSG00000135119.14,RNFT2,protein_coding	514.627	0.789218	0.810055	0.188961	4.17663	2.95863e-05	0.000914868
ENSG00000260230.2,FRRS1L,protein_coding	418.756	1.82274	2.22761	0.436485	4.17594	2.96752e-05	0.000916675
ENSG00000197629.5,MPEG1,protein_coding	270.132	-1.47242	-1.66105	0.352617	-4.17569	2.97082e-05	0.000916753
ENSG00000163219.11,ARHGAP25,protein_coding	170.706	-1.02967	-1.08161	0.246669	-4.1743	2.98904e-05	0.000921431
ENSG00000260947.1,RP11-384P7.7,lincRNA	231.482	1.58534	1.81197	0.379836	4.17374	2.99637e-05	0.000922748
ENSG00000139266.5,MARCH9,protein_coding	2185.71	1.96909	2.44841	0.47185	4.17312	3.0045e-05	0.000924306
ENSG00000140104.13,C14orf79,protein_coding	236.97	-0.77132	-0.79316	0.184915	-4.17122	3.02979e-05	0.000931133
ENSG00000140009.18,ESR2,protein_coding	241.79	-1.86386	-2.18531	0.446903	-4.17061	3.0378e-05	0.000932644
ENSG00000106993.11,CDC37L1,protein_coding	239.9	0.716807	0.733894	0.171918	4.16948	3.05293e-05	0.000936335
ENSG00000124813.20,RUNX2,protein_coding	315.529	-1.37821	-1.52209	0.330593	-4.16891	3.06058e-05	0.000937726
ENSG00000134460.15,IL2RA,protein_coding	49.441	-1.97553	-2.67748	0.474025	-4.16756	3.07881e-05	0.000942352
ENSG00000237289.9,CKMT1B,protein_coding	53.3017	1.8716	2.32088	0.449132	4.16715	3.08425e-05	0.000943061
ENSG00000088035.15,ALG6,protein_coding	397.442	1.06097	1.12808	0.254675	4.16597	3.10031e-05	0.000945025
ENSG00000229108.1,MEOX2-AS1,lincRNA	22.173	-2.16863	-3.15878	0.52052	-4.16627	3.09626e-05	0.000945025
ENSG00000110400.10,PVRL1,protein_coding	483.803	0.950162	0.992009	0.228091	4.16571	3.1039e-05	0.000945025
ENSG00000140557.11,ST8SIA2,protein_coding	65.7989	2.28867	3.76676	0.54943	4.16553	3.10636e-05	0.000945025
ENSG00000271605.5,MILR1,protein_coding	111.793	-1.221	-1.31771	0.293087	-4.16599	3.09998e-05	0.000945025
ENSG00000100599.15,RIN3,protein_coding	399.753	-1.13358	-1.20692	0.272174	-4.16489	3.115e-05	0.000946695
ENSG00000004399.12,PLXND1,protein_coding	2479.9	-1.09915	-1.16704	0.263954	-4.16419	3.12454e-05	0.000946729
ENSG00000110697.12,PITPNM1,protein_coding	442.087	-1.20378	-1.29289	0.289059	-4.16448	3.1206e-05	0.000946729
ENSG00000177576.11,C18orf32,protein_coding	679.365	0.618254	0.630366	0.148468	4.16423	3.12399e-05	0.000946729
ENSG00000153214.9,TMEM87B,protein_coding	581.354	-0.713488	-0.729532	0.171363	-4.16359	3.13276e-05	0.000948266
ENSG00000147526.19,TACC1,protein_coding	3931.57	-0.825599	-0.850132	0.198313	-4.16311	3.13935e-05	0.000949308
ENSG00000187955.11,COL14A1,protein_coding	493.609	-1.93154	-2.45626	0.464272	-4.16036	3.17751e-05	0.00095796
ENSG00000184922.13,FMNL1,protein_coding	320.435	-1.0969	-1.1638	0.26365	-4.16043	3.17645e-05	0.00095796
ENSG00000154975.13,CA10,protein_coding	194.76	2.23587	3.57806	0.537378	4.1607	3.17273e-05	0.00095796
ENSG00000142065.13,ZFP14,protein_coding	775.677	0.837296	0.865593	0.201358	4.15826	3.20687e-05	0.000965846
ENSG00000213096.9,ZNF254,protein_coding	1669.64	0.870458	0.903447	0.209356	4.15779	3.21335e-05	0.00096683
ENSG00000009844.15,VTA1,protein_coding	580.458	0.706269	0.725176	0.169905	4.15684	3.22675e-05	0.00096796
ENSG00000153179.11,RASSF3,protein_coding	268.126	-0.922847	-0.961413	0.221986	-4.15724	3.22119e-05	0.00096796
ENSG00000243811.7,APOBEC3D,protein_coding	35.5426	-1.34864	-1.47863	0.324423	-4.15705	3.2239e-05	0.00096796
ENSG00000153029.14,MR1,protein_coding	459.874	-1.12553	-1.19628	0.270826	-4.15592	3.23976e-05	0.000970896
ENSG00000250790.4,RP11-46H11.3,lincRNA	18.6431	2.13743	3.02744	0.514418	4.15505	3.25219e-05	0.000973653
ENSG00000267508.5,ZNF285,protein_coding	287.202	1.20654	1.30004	0.290538	4.15279	3.28443e-05	0.000982329
ENSG00000124942.13,AHNAK,protein_coding	13109.7	-1.13518	-1.20714	0.273428	-4.15166	3.30079e-05	0.000986243
ENSG00000233756.5,DSCAM-IT1,sense_intronic	18.1808	2.23452	3.47509	0.538317	4.15093	3.31124e-05	0.000988384
ENSG00000168542.12,COL3A1,protein_coding	5946.88	-1.97323	-2.5541	0.475417	-4.15052	3.3172e-05	0.000989183
ENSG00000066185.12,ZMYND12,protein_coding	23.4152	-1.59161	-1.84204	0.383565	-4.14953	3.33161e-05	0.000992187
ENSG00000172986.12,GXYLT2,protein_coding	254.173	-1.30523	-1.42394	0.314596	-4.14892	3.34045e-05	0.000992187
ENSG00000103876.11,FAH,protein_coding	172.636	-0.942935	-0.985683	0.227263	-4.14908	3.33808e-05	0.000992187
ENSG00000108821.13,COL1A1,protein_coding	7543.21	-1.97254	-2.55155	0.475426	-4.149	3.33934e-05	0.000992187
ENSG00000187607.15,ZNF286A,protein_coding	865.045	0.740795	0.758629	0.178685	4.14582	3.38595e-05	0.00100471
ENSG00000153250.17,RBMS1,protein_coding	1549.75	-1.16723	-1.24823	0.281576	-4.14536	3.39287e-05	0.00100577
ENSG00000150455.13,TIRAP,protein_coding	145.869	-0.674696	-0.691155	0.162794	-4.14447	3.40603e-05	0.00100868
ENSG00000114270.15,COL7A1,protein_coding	1271.02	-1.30184	-1.42657	0.314141	-4.14412	3.41119e-05	0.00100916
ENSG00000150625.16,GPM6A,protein_coding	5163.07	1.16003	1.24343	0.279951	4.14368	3.41771e-05	0.00100916
ENSG00000260070.1,RP11-182J23.1,antisense	25.2917	1.93913	2.47608	0.46795	4.14389	3.41466e-05	0.00100916
ENSG00000267519.3,CTD-3252C9.4,lincRNA	409.488	-1.36991	-1.50769	0.330662	-4.14293	3.42901e-05	0.00101151
ENSG00000162976.12,PQLC3,protein_coding	134.087	-1.28253	-1.38819	0.3096	-4.14252	3.43504e-05	0.00101229
ENSG00000162951.10,LRRTM1,protein_coding	49.9292	1.70074	1.96699	0.410665	4.14143	3.45148e-05	0.00101614
ENSG00000261786.1,RP4-555D20.2,lincRNA	853.523	1.89655	2.34075	0.45798	4.14113	3.45593e-05	0.00101646
ENSG00000118503.14,TNFAIP3,protein_coding	562.323	-1.19528	-1.2902	0.288678	-4.14053	3.46507e-05	0.00101756
ENSG00000105255.10,FSD1,protein_coding	224.823	0.984128	1.03218	0.237687	4.14044	3.46642e-05	0.00101756
ENSG00000111799.20,COL12A1,protein_coding	734.753	-1.62145	-1.88111	0.391637	-4.14018	3.47034e-05	0.00101772
ENSG00000117091.9,CD48,protein_coding	32.7903	-1.6507	-1.94927	0.398794	-4.13923	3.48471e-05	0.00101949
ENSG00000131042.13,LILRB2,protein_coding	69.5853	-1.32157	-1.44885	0.319306	-4.13889	3.48991e-05	0.00101949
ENSG00000182621.16,PLCB1,protein_coding	1074.89	1.27232	1.37919	0.307389	4.13911	3.48655e-05	0.00101949
ENSG00000101132.9,PFDN4,protein_coding	101.616	0.925341	0.971366	0.223546	4.13938	3.48241e-05	0.00101949
ENSG00000028137.16,TNFRSF1B,protein_coding	422.298	-1.25705	-1.362	0.303821	-4.13747	3.51153e-05	0.00102481
ENSG00000272650.1,RP11-571I18.4,lincRNA	18.7177	2.0024	2.6915	0.484176	4.13569	3.53891e-05	0.0010318
ENSG00000276030.1,CTD-2027I19.3,lincRNA	31.509	1.35095	1.4938	0.326908	4.1325	3.58834e-05	0.0010452
ENSG00000198028.3,ZNF560,protein_coding	43.7147	2.25152	3.34817	0.544912	4.1319	3.59782e-05	0.00104619
ENSG00000156265.15,MAP3K7CL,protein_coding	148.597	-1.44442	-1.61119	0.349582	-4.13184	3.59869e-05	0.00104619
ENSG00000160716.4,CHRNB2,protein_coding	171.391	1.59973	1.83542	0.387345	4.12999	3.62776e-05	0.00105261
ENSG00000183166.10,CALN1,protein_coding	128.237	1.99048	2.7137	0.481946	4.13009	3.62613e-05	0.00105261
ENSG00000145439.11,CBR4,protein_coding	840.107	0.692309	0.70607	0.167713	4.12795	3.66019e-05	0.001061
ENSG00000226476.3,RP11-776H12.1,lincRNA	714.441	1.81813	2.24576	0.440552	4.12695	3.67614e-05	0.00106459
ENSG00000143891.16,GALM,protein_coding	103.693	-1.08916	-1.15814	0.263957	-4.12626	3.68702e-05	0.00106672
ENSG00000168539.3,CHRM1,protein_coding	27.402	2.16268	3.21795	0.524283	4.12502	3.70701e-05	0.00107148
ENSG00000187902.11,SHISA7,protein_coding	338.476	1.95031	2.51246	0.472967	4.12357	3.7305e-05	0.00107723
ENSG00000164118.12,CEP44,protein_coding	438.542	0.601298	0.610128	0.145829	4.12332	3.73456e-05	0.00107737
ENSG00000151136.14,BTBD11,protein_coding	154.516	-1.80187	-2.28732	0.437164	-4.12172	3.76055e-05	0.00108383
ENSG00000242193.9,RP11-568K15.1,unitary_pseudogene	245.856	-1.35604	-1.48859	0.329059	-4.12096	3.77298e-05	0.00108637
ENSG00000151967.18,SCHIP1,protein_coding	816.071	0.600958	0.611278	0.145863	4.12002	3.78846e-05	0.00108979
ENSG00000275342.4,SGK223,protein_coding	502.355	-0.970623	-1.01931	0.235615	-4.11954	3.79634e-05	0.00109002
ENSG00000159322.17,ADPGK,protein_coding	1238.8	-0.615988	-0.627682	0.149529	-4.11953	3.7965e-05	0.00109002
ENSG00000184786.5,TCTE3,protein_coding	126.895	1.1013	1.17001	0.267448	4.11781	3.82487e-05	0.00109712
ENSG00000226508.1,AC104655.3,lincRNA	32.3082	1.89929	2.4271	0.461296	4.11729	3.83353e-05	0.00109813
ENSG00000196126.10,HLA-DRB1,protein_coding	847.529	-1.43141	-1.60047	0.347706	-4.11672	3.84297e-05	0.00109813
ENSG00000187796.13,CARD9,protein_coding	123.39	-1.19559	-1.27994	0.290417	-4.1168	3.84176e-05	0.00109813
ENSG00000131242.15,RAB11FIP4,protein_coding	484.792	1.43217	1.59261	0.347859	4.11711	3.83652e-05	0.00109813
ENSG00000114948.12,ADAM23,protein_coding	774.814	0.990917	1.03894	0.240768	4.11566	3.86081e-05	0.00110218
ENSG00000203668.1,CHML,protein_coding	706.63	1.06456	1.12236	0.258797	4.11348	3.89747e-05	0.00110948
ENSG00000152076.18,CCDC74B,protein_coding	108.454	-1.3333	-1.47489	0.324151	-4.11321	3.90188e-05	0.00110948
ENSG00000014257.15,ACPP,protein_coding	29.1157	-1.54373	-1.76531	0.375346	-4.11282	3.90849e-05	0.00110948
ENSG00000248184.1,RP11-231C18.1,lincRNA	24.0989	2.23746	3.417	0.544007	4.11293	3.90675e-05	0.00110948
ENSG00000172638.12,EFEMP2,protein_coding	796.385	-1.28439	-1.39503	0.312244	-4.1134	3.8987e-05	0.00110948
ENSG00000011422.11,PLAUR,protein_coding	233.183	-1.22977	-1.32941	0.298963	-4.11346	3.89776e-05	0.00110948
ENSG00000144893.12,MED12L,protein_coding	1210.09	-0.951162	-0.987475	0.231288	-4.11245	3.91481e-05	0.00111023
ENSG00000168772.10,CXXC4,protein_coding	562.139	1.59105	1.83698	0.387101	4.11016	3.95385e-05	0.00112024
ENSG00000182492.15,BGN,protein_coding	1821.96	-1.22011	-1.31779	0.2969	-4.1095	3.96522e-05	0.00112241
ENSG00000215218.3,UBE2QL1,protein_coding	110.878	1.9042	2.41107	0.463481	4.10849	3.98262e-05	0.00112628
ENSG00000072840.12,EVC,protein_coding	854.609	-1.29747	-1.4213	0.315831	-4.10812	3.98901e-05	0.00112703
ENSG00000149534.8,MS4A2,protein_coding	7.21496	-2.31657	-4.64199	0.563988	-4.10748	4.00005e-05	0.00112909
ENSG00000263219.1,RYKP1,processed_pseudogene	3.66031	2.18091	3.3516	0.531187	4.10573	4.03048e-05	0.001135
ENSG00000179277.9,MEIS3P1,processed_pseudogene	56.08	-1.43583	-1.60372	0.349701	-4.10587	4.02801e-05	0.001135
ENSG00000280122.1,RP11-87G24.2,TEC	78.0386	-1.92247	-2.37588	0.468253	-4.10562	4.0323e-05	0.001135
ENSG00000259969.1,RP11-999E24.3,sense_overlapping	77.6365	1.51966	1.7356	0.370298	4.10387	4.06302e-05	0.00114258
ENSG00000176845.12,METRNL,protein_coding	213.318	-1.21796	-1.31515	0.296901	-4.10226	4.09126e-05	0.00114945
ENSG00000139318.7,DUSP6,protein_coding	1700.74	-1.30338	-1.41722	0.31781	-4.10114	4.11116e-05	0.00115396
ENSG00000185201.16,IFITM2,protein_coding	248.255	-1.34215	-1.4718	0.327292	-4.10078	4.11757e-05	0.00115468
ENSG00000181585.3,TMIE,protein_coding	68.3484	-1.94468	-2.51427	0.474303	-4.10007	4.13029e-05	0.00115717
ENSG00000147316.12,MCPH1,protein_coding	683.108	0.464587	0.469581	0.113325	4.09958	4.13901e-05	0.0011575
ENSG00000185885.15,IFITM1,protein_coding	157.883	-1.62134	-1.85433	0.395495	-4.09953	4.13994e-05	0.0011575
ENSG00000173821.19,RNF213,protein_coding	9033.63	-0.824444	-0.849972	0.201115	-4.09936	4.14297e-05	0.0011575
ENSG00000106560.10,GIMAP2,protein_coding	92.7896	-1.14103	-1.21763	0.278567	-4.09608	4.20206e-05	0.00117183
ENSG00000108950.11,FAM20A,protein_coding	237.065	-1.43875	-1.61242	0.351237	-4.09625	4.19905e-05	0.00117183
ENSG00000013288.8,MAN2B2,protein_coding	714.885	-0.693933	-0.709007	0.169441	-4.09542	4.21403e-05	0.00117326
ENSG00000102871.15,TRADD,protein_coding	113.088	-0.866423	-0.898813	0.211573	-4.09516	4.21886e-05	0.00117326
ENSG00000088827.12,SIGLEC1,protein_coding	441.476	-1.50997	-1.71928	0.368715	-4.09524	4.21737e-05	0.00117326
ENSG00000096433.10,ITPR3,protein_coding	540.892	-1.6232	-1.88087	0.39654	-4.09341	4.2508e-05	0.00118052
ENSG00000165655.15,ZNF503,protein_coding	172.766	-1.10746	-1.17426	0.270554	-4.0933	4.25283e-05	0.00118052
ENSG00000100365.14,NCF4,protein_coding	73.0911	-1.33497	-1.46855	0.326267	-4.09165	4.28316e-05	0.00118785
ENSG00000171864.4,PRND,protein_coding	23.9165	-2.30366	-4.64488	0.563095	-4.09107	4.29393e-05	0.00118974
ENSG00000082701.14,GSK3B,protein_coding	2698.21	0.682371	0.697898	0.166838	4.09002	4.31327e-05	0.001194
ENSG00000114054.13,PCCB,protein_coding	530.8	0.507389	0.514923	0.124083	4.08912	4.33007e-05	0.0011972
ENSG00000126858.16,RHOT1,protein_coding	829.926	0.523907	0.531422	0.128127	4.08898	4.33277e-05	0.0011972
ENSG00000123545.5,NDUFAF4,protein_coding	188.081	0.914538	0.956165	0.223798	4.08645	4.38028e-05	0.00120921
ENSG00000189171.14,S100A13,protein_coding	198.957	-1.24252	-1.33086	0.304147	-4.08525	4.40285e-05	0.00121433
ENSG00000135047.14,CTSL,protein_coding	484.793	-1.113	-1.17958	0.272469	-4.08485	4.41045e-05	0.00121531
ENSG00000143858.11,SYT2,protein_coding	48.8546	2.07859	2.91847	0.508969	4.08393	4.428e-05	0.00121848
ENSG00000204103.3,MAFB,protein_coding	847.849	-1.13024	-1.21169	0.27676	-4.08382	4.43004e-05	0.00121848
ENSG00000206077.10,ZDHHC11B,protein_coding	508.158	1.83903	2.24324	0.450352	4.08354	4.43538e-05	0.00121884
ENSG00000102678.6,FGF9,protein_coding	69.4343	2.03487	2.79487	0.498376	4.08299	4.4459e-05	0.00121951
ENSG00000129226.13,CD68,protein_coding	630.744	-1.27225	-1.38474	0.311594	-4.08303	4.44521e-05	0.00121951
ENSG00000182575.7,NXPH3,protein_coding	205.083	1.52994	1.72326	0.374932	4.08057	4.49254e-05	0.00123118
ENSG00000043143.20,JADE2,protein_coding	653.207	-1.15252	-1.2207	0.282687	-4.07701	4.56186e-05	0.00124904
ENSG00000129465.15,RIPK3,protein_coding	36.6538	-1.47849	-1.67398	0.362763	-4.07564	4.5887e-05	0.00125524
ENSG00000115355.15,CCDC88A,protein_coding	8293.06	0.671538	0.68613	0.164805	4.07473	4.60675e-05	0.00125892
ENSG00000196353.11,CPNE4,protein_coding	231.083	-1.993	-2.65491	0.48916	-4.07433	4.61469e-05	0.00125892
ENSG00000160185.14,UBASH3A,protein_coding	6.09666	-2.04801	-2.78343	0.50265	-4.07443	4.61274e-05	0.00125892
ENSG00000164309.14,CMYA5,protein_coding	1584.76	-1.41599	-1.57932	0.347626	-4.07333	4.63459e-05	0.00126207
ENSG00000122359.17,ANXA11,protein_coding	620.84	-0.939927	-0.982428	0.230744	-4.07347	4.63179e-05	0.00126207
ENSG00000280079.1,CTC-260E6.4,TEC	120.504	1.3118	1.43068	0.322108	4.07255	4.65016e-05	0.00126516
ENSG00000169418.9,NPR1,protein_coding	87.6948	-1.67669	-1.88325	0.411816	-4.07144	4.67228e-05	0.00127003
ENSG00000261126.7,RP11-795F19.1,lincRNA	180.805	1.01122	1.06559	0.248479	4.06964	4.70854e-05	0.00127873
ENSG00000000938.12,FGR,protein_coding	112.009	-1.08342	-1.151	0.266361	-4.06748	4.75234e-05	0.00128876
ENSG00000255618.1,RP11-357K6.1,lincRNA	1.65001	2.27915	4.80774	0.560346	4.0674	4.754e-05	0.00128876
ENSG00000162711.16,NLRP3,protein_coding	150.436	-1.29113	-1.41608	0.317506	-4.06646	4.77321e-05	0.00128932
ENSG00000077063.10,CTTNBP2,protein_coding	1053.59	1.12678	1.20092	0.277083	4.06657	4.77108e-05	0.00128932
ENSG00000130227.16,XPO7,protein_coding	1548.74	0.578094	0.588727	0.142158	4.06656	4.77131e-05	0.00128932
ENSG00000105409.15,ATP1A3,protein_coding	503.191	1.73197	2.07216	0.425861	4.06699	4.76238e-05	0.00128932
ENSG00000213760.10,ATP6V1G2,protein_coding	244.268	1.37727	1.53321	0.338778	4.06541	4.79479e-05	0.00129283
ENSG00000262119.1,RP11-483C6.1,sense_intronic	1257.6	1.391	1.55556	0.342145	4.06553	4.79228e-05	0.00129283
ENSG00000044090.8,CUL7,protein_coding	478.502	-0.979546	-1.02684	0.241071	-4.06331	4.83826e-05	0.00129982
ENSG00000240050.5,RP1-93H18.1,lincRNA	22.1204	1.44516	1.61199	0.355636	4.0636	4.83223e-05	0.00129982
ENSG00000064201.15,TSPAN32,protein_coding	13.3117	-1.65653	-1.95349	0.407639	-4.06371	4.82988e-05	0.00129982
ENSG00000101746.15,NOL4,protein_coding	370.992	1.19436	1.27936	0.293925	4.06349	4.8344e-05	0.00129982
ENSG00000198951.11,NAGA,protein_coding	406.001	-0.726442	-0.744368	0.17879	-4.06311	4.84229e-05	0.00129982
ENSG00000162630.5,B3GALT2,protein_coding	122.787	1.71572	2.05813	0.422332	4.06249	4.85528e-05	0.00129983
ENSG00000274029.1,RP11-340F14.6,lincRNA	17.5894	1.92574	2.45615	0.473983	4.06288	4.84703e-05	0.00129983
ENSG00000206052.10,DOK6,protein_coding	182.289	1.77332	2.2102	0.436505	4.06255	4.85399e-05	0.00129983
ENSG00000115085.13,ZAP70,protein_coding	36.1153	-1.30203	-1.43426	0.320591	-4.06135	4.87887e-05	0.00130418
ENSG00000105851.10,PIK3CG,protein_coding	186.431	-1.10488	-1.17536	0.272093	-4.06067	4.89316e-05	0.00130418
ENSG00000130956.13,HABP4,protein_coding	484.331	0.61694	0.628168	0.15191	4.06122	4.88173e-05	0.00130418
ENSG00000058335.15,RASGRF1,protein_coding	164.093	2.03821	2.91919	0.501906	4.06094	4.88758e-05	0.00130418
ENSG00000196209.12,SIRPB2,protein_coding	142.895	-1.39094	-1.54802	0.342529	-4.06081	4.89023e-05	0.00130418
ENSG00000187678.8,SPRY4,protein_coding	2488.26	-1.4698	-1.63872	0.361987	-4.06036	4.89974e-05	0.00130478
ENSG00000092140.14,G2E3,protein_coding	639.909	0.737358	0.757914	0.18162	4.0599	4.90936e-05	0.00130618
ENSG00000280623.1,PCAT14,lincRNA	11.9471	-1.89651	-2.42492	0.467158	-4.05968	4.91401e-05	0.00130627
ENSG00000198739.10,LRRTM3,protein_coding	269.26	1.49056	1.70638	0.367403	4.05701	4.97052e-05	0.00132013
ENSG00000027869.11,SH2D2A,protein_coding	16.6202	-1.76183	-2.13808	0.434401	-4.05576	4.99715e-05	0.0013237
ENSG00000204257.14,HLA-DMA,protein_coding	357.385	-1.22903	-1.33215	0.303031	-4.0558	4.99631e-05	0.0013237
ENSG00000008323.15,PLEKHG6,protein_coding	8.75904	-2.12021	-2.90362	0.522728	-4.05606	4.99084e-05	0.0013237
ENSG00000111885.6,MAN1A1,protein_coding	332.355	-1.39131	-1.54951	0.343155	-4.05446	5.02507e-05	0.00132875
ENSG00000107968.9,MAP3K8,protein_coding	184.967	-1.35063	-1.49329	0.333108	-4.05463	5.02141e-05	0.00132875
ENSG00000185519.8,FAM131C,protein_coding	18.9729	1.7393	2.15328	0.429215	4.05227	5.07222e-05	0.00134004
ENSG00000137809.16,ITGA11,protein_coding	326.297	-1.51748	-1.73329	0.374579	-4.05116	5.09642e-05	0.00134526
ENSG00000163975.11,MFI2,protein_coding	187.184	-1.21501	-1.3151	0.299963	-4.05053	5.11018e-05	0.00134771
ENSG00000112297.14,AIM1,protein_coding	406.848	-1.52165	-1.7451	0.375767	-4.04944	5.13397e-05	0.0013528
ENSG00000152954.11,NRSN1,protein_coding	145.933	1.70874	2.06457	0.422147	4.04774	5.17144e-05	0.00136148
ENSG00000249825.5,CTD-2201I18.1,antisense	29.3032	1.71357	2.04276	0.423398	4.04717	5.18396e-05	0.0013624
ENSG00000255920.1,CCND2-AS2,antisense	10.5078	1.81719	2.21207	0.448994	4.04726	5.18206e-05	0.0013624
ENSG00000089050.14,RBBP9,protein_coding	582.861	0.667872	0.683227	0.165068	4.04605	5.20883e-05	0.00136774
ENSG00000247774.6,PCED1B-AS1,processed_transcript	64.9561	-1.24196	-1.34796	0.307027	-4.04512	5.22956e-05	0.00137135
ENSG00000141736.13,ERBB2,protein_coding	721.323	-1.03041	-1.08632	0.254735	-4.04503	5.23169e-05	0.00137135
ENSG00000100142.14,POLR2F,protein_coding	264.271	1.13809	1.219	0.281406	4.04428	5.24839e-05	0.00137453
ENSG00000168484.12,SFTPC,protein_coding	5.59433	2.06242	2.90472	0.510147	4.04279	5.28189e-05	0.0013821
ENSG00000163932.13,PRKCD,protein_coding	161.334	-0.849858	-0.880297	0.210251	-4.04211	5.29717e-05	0.0013849
ENSG00000011523.13,CEP68,protein_coding	994.181	0.690474	0.706954	0.170838	4.04168	5.30698e-05	0.00138626
ENSG00000122484.8,RPAP2,protein_coding	2028.7	0.815941	0.842578	0.201899	4.04133	5.31487e-05	0.00138712
ENSG00000187037.8,GPR141,protein_coding	21.289	-1.80234	-2.22373	0.446002	-4.0411	5.32015e-05	0.00138729
ENSG00000019505.7,SYT13,protein_coding	133.134	2.19427	3.8115	0.5431	4.04027	5.3389e-05	0.00139098
ENSG00000168306.12,ACOX2,protein_coding	116.141	-1.41103	-1.57135	0.34926	-4.04005	5.34404e-05	0.00139111
ENSG00000105251.10,SHD,protein_coding	225.741	1.74324	2.08796	0.431786	4.03728	5.40746e-05	0.00140641
ENSG00000106333.12,PCOLCE,protein_coding	602.645	-1.81041	-2.24314	0.448471	-4.03685	5.41738e-05	0.00140777
ENSG00000116852.14,KIF21B,protein_coding	1783.81	1.57228	1.81647	0.389653	4.03509	5.45812e-05	0.00141227
ENSG00000118922.16,KLF12,protein_coding	2206.82	1.0201	1.07697	0.252794	4.0353	5.45329e-05	0.00141227
ENSG00000260198.1,RP11-441F2.2,sense_intronic	80.4202	1.42446	1.59543	0.35301	4.03517	5.45624e-05	0.00141227
ENSG00000198093.10,ZNF649,protein_coding	547.012	0.98765	1.03776	0.244737	4.03556	5.44728e-05	0.00141227
ENSG00000132639.12,SNAP25,protein_coding	894.758	1.78347	2.19687	0.441944	4.03551	5.44846e-05	0.00141227
ENSG00000196141.12,SPATS2L,protein_coding	1545.07	-0.983467	-1.02997	0.243747	-4.03479	5.46522e-05	0.00141289
ENSG00000184060.10,ADAP2,protein_coding	609.488	-1.00066	-1.05423	0.248145	-4.03255	5.51739e-05	0.00142515
ENSG00000141480.17,ARRB2,protein_coding	699.674	-0.744323	-0.765561	0.184602	-4.03204	5.52959e-05	0.00142708
ENSG00000128604.18,IRF5,protein_coding	144.824	-1.04328	-1.10154	0.258839	-4.0306	5.56343e-05	0.00143458
ENSG00000064666.14,CNN2,protein_coding	359.318	-1.40463	-1.56629	0.348618	-4.02914	5.59807e-05	0.00144182
ENSG00000126970.15,ZC4H2,protein_coding	218.406	1.17654	1.26097	0.292018	4.02902	5.60105e-05	0.00144182
ENSG00000114107.8,CEP70,protein_coding	501.29	0.564801	0.573432	0.140226	4.02778	5.63054e-05	0.00144817
ENSG00000107295.9,SH3GL2,protein_coding	240.613	1.85479	2.28501	0.460637	4.02657	5.65955e-05	0.00145439
ENSG00000133069.14,TMCC2,protein_coding	200.568	1.27606	1.40097	0.316998	4.02544	5.68681e-05	0.00145807
ENSG00000177103.13,DSCAML1,protein_coding	466.783	1.7776	2.19404	0.441599	4.02538	5.68839e-05	0.00145807
ENSG00000196090.12,PTPRT,protein_coding	447.254	2.10304	3.09813	0.522406	4.02568	5.68109e-05	0.00145807
ENSG00000137343.17,ATAT1,protein_coding	679.034	0.816267	0.842976	0.202868	4.02364	5.73049e-05	0.00146387
ENSG00000213145.9,CRIP1,protein_coding	58.6059	-1.54201	-1.76845	0.38322	-4.02383	5.72583e-05	0.00146387
ENSG00000260913.1,LINC01254,lincRNA	4.43491	2.24608	4.34196	0.558203	4.02378	5.72716e-05	0.00146387
ENSG00000198547.8,C20orf203,lincRNA	51.4409	1.63491	1.9791	0.40632	4.02369	5.72921e-05	0.00146387
ENSG00000186020.12,ZNF529,protein_coding	831.08	0.75816	0.781699	0.188453	4.02306	5.74465e-05	0.00146625
ENSG00000145685.13,LHFPL2,protein_coding	1669.95	-0.872121	-0.905035	0.216805	-4.0226	5.75588e-05	0.00146787
ENSG00000164054.15,SHISA5,protein_coding	1351.6	-0.78263	-0.806694	0.194601	-4.02172	5.77747e-05	0.00147213
ENSG00000272842.1,RP11-513M16.7,antisense	7.1458	1.67114	1.99312	0.415606	4.02098	5.79556e-05	0.00147549
ENSG00000130348.11,QRSL1,protein_coding	398.769	0.640762	0.654759	0.159379	4.02038	5.81051e-05	0.00147805
ENSG00000123684.12,LPGAT1,protein_coding	1633.38	0.62993	0.642829	0.1567	4.01997	5.82054e-05	0.00147935
ENSG00000181704.11,YIPF6,protein_coding	1523.64	0.554985	0.563654	0.138087	4.01911	5.84183e-05	0.00148351
ENSG00000182109.7,RP11-69E11.4,antisense	167.83	-0.994054	-1.0456	0.247366	-4.01856	5.85555e-05	0.00148449
ENSG00000113721.13,PDGFRB,protein_coding	1830.78	-1.22656	-1.32909	0.305219	-4.01862	5.85406e-05	0.00148449
ENSG00000165259.13,HDX,protein_coding	261.853	0.790669	0.815399	0.196765	4.01834	5.86098e-05	0.00148462
ENSG00000164023.14,SGMS2,protein_coding	183.519	-1.42316	-1.59642	0.354189	-4.01808	5.86739e-05	0.00148499
ENSG00000100181.21,TPTEP1,lincRNA	329.888	2.10722	2.83582	0.524471	4.01781	5.87418e-05	0.00148546
ENSG00000204954.9,C12orf73,protein_coding	99.4921	0.6863	0.70272	0.170892	4.01599	5.91968e-05	0.00149571
ENSG00000118292.8,C1orf54,protein_coding	54.45	-1.26939	-1.37648	0.316253	-4.01385	5.97357e-05	0.00150806
ENSG00000163191.5,S100A11,protein_coding	421.735	-1.13475	-1.21297	0.282758	-4.01315	5.99139e-05	0.00151003
ENSG00000096654.15,ZNF184,protein_coding	290.701	0.58582	0.595762	0.145968	4.01334	5.98649e-05	0.00151003
ENSG00000229953.1,RP11-284F21.7,antisense	14.3621	-1.8638	-2.38975	0.464469	-4.01277	6.00113e-05	0.00151122
ENSG00000103160.11,HSDL1,protein_coding	583.69	0.900009	0.93999	0.224325	4.01208	6.01863e-05	0.00151436
ENSG00000148444.15,COMMD3,protein_coding	217.046	0.728508	0.749322	0.181628	4.01098	6.04669e-05	0.00152015
ENSG00000163823.3,CCR1,protein_coding	201.462	-0.956311	-0.999319	0.238479	-4.01004	6.07072e-05	0.00152365
ENSG00000225683.5,PACRG-AS3,antisense	28.7693	1.99217	2.70756	0.496794	4.01006	6.07045e-05	0.00152365
ENSG00000197584.11,KCNMB2,protein_coding	38.8954	1.74614	2.24472	0.43562	4.00841	6.11289e-05	0.00153295
ENSG00000131203.12,IDO1,protein_coding	20.3509	-2.13731	-3.13534	0.533246	-4.00811	6.12059e-05	0.00153361
ENSG00000231864.2,RP11-229P13.23,antisense	8.50319	-1.83026	-2.46631	0.4568	-4.0067	6.15718e-05	0.0015415
ENSG00000144161.12,ZC3H8,protein_coding	475.015	0.817062	0.843926	0.203949	4.00621	6.16998e-05	0.00154262
ENSG00000163607.14,GTPBP8,protein_coding	138.819	0.665552	0.680422	0.166133	4.00614	6.17192e-05	0.00154262
ENSG00000124194.15,GDAP1L1,protein_coding	75.1663	1.78644	2.20861	0.44596	4.00583	6.18012e-05	0.00154339
ENSG00000156599.10,ZDHHC5,protein_coding	938.03	-0.499918	-0.505631	0.124818	-4.00517	6.19724e-05	0.00154638
ENSG00000153071.14,DAB2,protein_coding	984.778	-1.13252	-1.21524	0.282807	-4.00455	6.21348e-05	0.00154915
ENSG00000183055.5,FAM133CP,processed_pseudogene	6.27842	-1.85712	-2.45926	0.463817	-4.00399	6.22838e-05	0.00155158
ENSG00000182183.14,FAM159A,protein_coding	22.9348	-1.31609	-1.44841	0.32873	-4.00356	6.23951e-05	0.00155307
ENSG00000135272.9,MDFIC,protein_coding	522.064	-1.40298	-1.59615	0.350465	-4.00318	6.24959e-05	0.0015532
ENSG00000125430.8,HS3ST3B1,protein_coding	433.747	-1.76202	-2.18087	0.440158	-4.00315	6.25036e-05	0.0015532
ENSG00000106714.17,CNTNAP3,protein_coding	460.522	-1.63518	-1.91925	0.408497	-4.00292	6.25653e-05	0.00155346
ENSG00000132749.10,MTL5,protein_coding	8.27257	-1.73466	-2.09899	0.433432	-4.00215	6.27694e-05	0.00155724
ENSG00000268182.5,SMIM17,protein_coding	28.0722	1.4602	1.66496	0.364875	4.00191	6.28342e-05	0.00155756
ENSG00000182704.7,TSKU,protein_coding	340.368	-1.16056	-1.23434	0.290038	-4.0014	6.29676e-05	0.00155959
ENSG00000179915.21,NRXN1,protein_coding	3126.53	1.74256	2.1404	0.435556	4.00077	6.3136e-05	0.00156176
ENSG00000261371.5,PECAM1,protein_coding	896.48	-1.21978	-1.32093	0.304894	-4.00069	6.31592e-05	0.00156176
ENSG00000132600.16,PRMT7,protein_coding	728.251	0.605582	0.61623	0.151392	4.0001	6.33157e-05	0.00156435
ENSG00000173452.13,TMEM196,protein_coding	63.8202	2.1807	3.58315	0.545308	3.99902	6.3604e-05	0.00157018
ENSG00000077080.9,ACTL6B,protein_coding	38.6458	1.93037	2.51287	0.482905	3.99741	6.40389e-05	0.00157963
ENSG00000172197.10,MBOAT1,protein_coding	49.2514	-1.36233	-1.50974	0.341053	-3.99448	6.48353e-05	0.00159593
ENSG00000176566.4,DCAF4L2,protein_coding	79.0803	1.95805	2.62653	0.490169	3.99465	6.47893e-05	0.00159593
ENSG00000133169.5,BEX1,protein_coding	414.634	1.25214	1.36591	0.313474	3.9944	6.48589e-05	0.00159593
ENSG00000166900.14,STX3,protein_coding	354.458	-1.01505	-1.07524	0.254138	-3.99409	6.49444e-05	0.00159673
ENSG00000271086.5,NAMA,lincRNA	47.2088	1.55979	1.82152	0.390562	3.9937	6.50506e-05	0.00159804
ENSG00000269489.1,RP11-98D18.17,lincRNA	5.80139	1.96159	2.56246	0.491496	3.99106	6.57776e-05	0.00161344
ENSG00000180921.6,FAM83H,protein_coding	74.7988	-1.50332	-1.70417	0.376673	-3.99104	6.57848e-05	0.00161344
ENSG00000256463.8,SALL3,protein_coding	1741.86	1.47596	1.66946	0.36987	3.99047	6.59412e-05	0.00161596
ENSG00000173473.10,SMARCC1,protein_coding	2024.73	0.578253	0.58874	0.144938	3.98966	6.61675e-05	0.00162019
ENSG00000182866.16,LCK,protein_coding	12.8148	-1.98964	-2.63841	0.498821	-3.98868	6.64407e-05	0.00162292
ENSG00000083097.14,DOPEY1,protein_coding	1415.32	0.69255	0.709966	0.173628	3.98869	6.64385e-05	0.00162292
ENSG00000198300.12,PEG3,protein_coding	2048.12	1.22064	1.31184	0.306001	3.98899	6.63539e-05	0.00162292
ENSG00000266916.5,ZNF793-AS1,antisense	22.9397	1.44992	1.66296	0.363599	3.98767	6.67246e-05	0.00162853
ENSG00000196793.13,ZNF239,protein_coding	110.487	0.997078	1.04972	0.250101	3.9867	6.69973e-05	0.00163387
ENSG00000149499.11,EML3,protein_coding	742.429	-0.89888	-0.93659	0.225492	-3.9863	6.71119e-05	0.00163534
ENSG00000281508.1,CDR1-AS,antisense	11467.4	2.10894	3.23005	0.529271	3.98462	6.75874e-05	0.00164559
ENSG00000104814.12,MAP4K1,protein_coding	58.9106	-1.12169	-1.20479	0.281558	-3.98387	6.78024e-05	0.00164949
ENSG00000115808.11,STRN,protein_coding	1480.01	0.585478	0.596633	0.147012	3.98252	6.81886e-05	0.00165755
ENSG00000213967.10,ZNF726,protein_coding	178.49	1.26701	1.38328	0.318159	3.98232	6.82452e-05	0.00165759
ENSG00000179163.11,FUCA1,protein_coding	171.485	-1.47658	-1.68798	0.370804	-3.98211	6.83064e-05	0.00165774
ENSG00000186787.7,SPIN2B,protein_coding	71.6527	0.715876	0.73446	0.179784	3.98186	6.83776e-05	0.00165813
ENSG00000269930.1,RP11-932O9.9,lincRNA	37.6637	-1.47727	-1.68078	0.371142	-3.98035	6.88142e-05	0.00166603
ENSG00000159128.14,IFNGR2,protein_coding	578.017	-0.853574	-0.881359	0.214441	-3.98046	6.87827e-05	0.00166603
ENSG00000158427.14,TMSB15B,protein_coding	143.95	1.18018	1.26846	0.296553	3.97965	6.90157e-05	0.00166957
ENSG00000157680.15,DGKI,protein_coding	1475.37	1.26601	1.37878	0.318165	3.9791	6.91755e-05	0.00167209
ENSG00000128641.18,MYO1B,protein_coding	1417.22	-1.30707	-1.44624	0.328589	-3.97782	6.95513e-05	0.00167983
ENSG00000279307.2,RP11-130L8.3,processed_pseudogene	1.8427	2.20558	4.64444	0.554519	3.97746	6.9655e-05	0.00168098
ENSG00000088970.15,KIZ,protein_coding	632.912	0.936436	0.97714	0.235575	3.9751	7.0349e-05	0.00169638
ENSG00000010610.9,CD4,protein_coding	454.65	-1.28204	-1.40448	0.322743	-3.97232	7.11766e-05	0.00171496
ENSG00000078687.16,TNRC6C,protein_coding	1715.27	0.59423	0.603463	0.149614	3.97175	7.13468e-05	0.00171768
ENSG00000139767.8,SRRM4,protein_coding	167.054	2.02639	2.85118	0.510263	3.97126	7.1493e-05	0.00171983
ENSG00000171492.14,LRRC8D,protein_coding	755.113	0.76566	0.789692	0.192812	3.97102	7.15665e-05	0.00172022
ENSG00000147874.10,HAUS6,protein_coding	820.573	0.706526	0.723711	0.177933	3.97073	7.1653e-05	0.0017208
ENSG00000197142.10,ACSL5,protein_coding	95.7864	-1.30291	-1.43112	0.328143	-3.97056	7.17049e-05	0.0017208
ENSG00000281205.1,LINC00950,lincRNA	317.652	1.28972	1.41732	0.325009	3.96827	7.23962e-05	0.00173601
ENSG00000102309.12,PIN4,protein_coding	180.443	0.680575	0.699337	0.171512	3.96808	7.24538e-05	0.00173601
ENSG00000272047.1,GTF2H5,protein_coding	338.103	0.798403	0.828774	0.201342	3.9654	7.32728e-05	0.00175284
ENSG00000140600.16,SH3GL3,protein_coding	69.2392	2.0784	3.16047	0.524127	3.96546	7.32549e-05	0.00175284
ENSG00000138185.17,ENTPD1,protein_coding	777.974	-0.93393	-0.97765	0.235539	-3.96508	7.33713e-05	0.00175381
ENSG00000158163.14,DZIP1L,protein_coding	363.566	-1.01225	-1.06984	0.255349	-3.96418	7.36487e-05	0.00175904
ENSG00000178685.13,PARP10,protein_coding	672.092	-1.04282	-1.10463	0.263075	-3.96396	7.37164e-05	0.00175926
ENSG00000076258.9,FMO4,protein_coding	38.7814	-1.16902	-1.26254	0.29508	-3.96169	7.44224e-05	0.0017719
ENSG00000198794.11,SCAMP5,protein_coding	818.597	0.959214	1.00155	0.242118	3.96177	7.43973e-05	0.0017719
ENSG00000008517.16,IL32,protein_coding	81.0671	-1.51853	-1.74921	0.383297	-3.96175	7.44025e-05	0.0017719
ENSG00000251533.2,LINC00605,lincRNA	1.2923	-2.22983	-4.70177	0.562926	-3.96114	7.45943e-05	0.00177459
ENSG00000184492.6,FOXD4L1,protein_coding	15.9892	1.71977	2.14504	0.434232	3.96049	7.4796e-05	0.00177769
ENSG00000204271.10,SPIN3,protein_coding	142.16	0.745963	0.765947	0.188358	3.96034	7.48426e-05	0.00177769
ENSG00000168890.13,TMEM150A,protein_coding	138.734	-0.772115	-0.79699	0.195024	-3.95908	7.52384e-05	0.00178147
ENSG00000155011.8,DKK2,protein_coding	20.1258	-1.87369	-2.46402	0.473222	-3.95942	7.51324e-05	0.00178147
ENSG00000160883.10,HK3,protein_coding	87.414	-1.35081	-1.50696	0.341157	-3.95949	7.51111e-05	0.00178147
ENSG00000106683.14,LIMK1,protein_coding	1283.47	-1.05626	-1.12407	0.266786	-3.9592	7.52021e-05	0.00178147
ENSG00000264364.2,DYNLL2,protein_coding	2768.07	0.734677	0.755575	0.185593	3.95853	7.54112e-05	0.00178416
ENSG00000157933.9,SKI,protein_coding	2500.19	-0.490358	-0.496007	0.123881	-3.95828	7.54907e-05	0.00178464
ENSG00000085274.15,MYNN,protein_coding	492.592	0.570734	0.580502	0.144214	3.95754	7.57266e-05	0.00178808
ENSG00000261087.1,KB-1460A1.5,lincRNA	179.397	1.16014	1.25009	0.293153	3.95745	7.57549e-05	0.00178808
ENSG00000178177.14,LCORL,protein_coding	834.172	0.768734	0.79117	0.19428	3.95683	7.59501e-05	0.00179011
ENSG00000198561.13,CTNND1,protein_coding	4343.01	-0.402878	-0.405987	0.101819	-3.9568	7.596e-05	0.00179011
ENSG00000107807.12,TLX1,protein_coding	7.35703	2.09424	2.91946	0.529687	3.95373	7.69412e-05	0.00181182
ENSG00000151490.13,PTPRO,protein_coding	548.767	1.22302	1.32521	0.309568	3.95071	7.79181e-05	0.00183339
ENSG00000153551.13,CMTM7,protein_coding	97.4399	-1.1584	-1.25215	0.293263	-3.95005	7.81344e-05	0.00183704
ENSG00000116544.11,DLGAP3,protein_coding	97.7613	1.62651	1.91602	0.411861	3.94916	7.84265e-05	0.00184119
ENSG00000159214.12,CCDC24,protein_coding	128.737	-0.884133	-0.921105	0.223922	-3.94839	7.86774e-05	0.00184119
ENSG00000170365.9,SMAD1,protein_coding	645.349	-0.750858	-0.773431	0.190152	-3.94873	7.85684e-05	0.00184119
ENSG00000165238.16,WNK2,protein_coding	492.355	1.72088	2.109	0.435794	3.94884	7.8531e-05	0.00184119
ENSG00000043355.10,ZIC2,protein_coding	196.905	-1.49093	-1.69356	0.377599	-3.94844	7.86623e-05	0.00184119
ENSG00000267249.1,RP11-973H7.3,sense_intronic	9.71282	1.35285	1.52932	0.342624	3.94851	7.86388e-05	0.00184119
ENSG00000148175.12,STOM,protein_coding	1385.29	-1.23895	-1.34575	0.313846	-3.94764	7.89266e-05	0.00184558
ENSG00000162105.16,SHANK2,protein_coding	396.083	1.70027	2.00705	0.430788	3.94689	7.91737e-05	0.00184992
ENSG00000082512.14,TRAF5,protein_coding	622.495	-0.651665	-0.666886	0.165128	-3.94643	7.93246e-05	0.00185201
ENSG00000048828.16,FAM120A,protein_coding	2596.5	-0.440189	-0.443891	0.11157	-3.94542	7.96608e-05	0.00185555
ENSG00000110324.9,IL10RA,protein_coding	564.86	-1.30053	-1.43323	0.32963	-3.94543	7.96564e-05	0.00185555
ENSG00000127533.3,F2RL3,protein_coding	30.8045	-1.79264	-2.25178	0.454338	-3.94562	7.95938e-05	0.00185555
ENSG00000085552.16,IGSF9,protein_coding	71.2117	1.35606	1.51109	0.343769	3.94468	7.99072e-05	0.00185985
ENSG00000164796.17,CSMD3,protein_coding	391.554	1.89168	2.61074	0.479743	3.94311	8.04326e-05	0.00187063
ENSG00000255403.1,AP000641.1,processed_pseudogene	89.6568	1.67157	2.09157	0.423955	3.94281	8.05314e-05	0.00187148
ENSG00000081041.8,CXCL2,protein_coding	106.723	-1.50444	-1.73057	0.381763	-3.94077	8.12188e-05	0.00188601
ENSG00000132357.13,CARD6,protein_coding	132.247	-1.11885	-1.19867	0.283979	-3.93992	8.15104e-05	0.00189132
ENSG00000177374.12,HIC1,protein_coding	256.69	-1.27043	-1.39014	0.322501	-3.93929	8.1722e-05	0.00189477
ENSG00000183891.5,TTC32,protein_coding	106.951	0.741875	0.764761	0.188358	3.93865	8.19425e-05	0.0018955
ENSG00000237125.8,HAND2-AS1,antisense	41.1791	1.94354	2.55084	0.493417	3.93893	8.18456e-05	0.0018955
ENSG00000260128.6,ULK4P2,transcribed_unprocessed_pseudogene	14.5115	-1.93926	-2.60484	0.492346	-3.93882	8.18821e-05	0.0018955
ENSG00000134717.17,BTF3L4,protein_coding	1244.66	0.663934	0.680467	0.16858	3.93838	8.20326e-05	0.00189613
ENSG00000085733.15,CTTN,protein_coding	2379.35	-0.583034	-0.592917	0.148093	-3.93693	8.25291e-05	0.00190614
ENSG00000185340.15,GAS2L1,protein_coding	478.452	-0.915745	-0.957811	0.232676	-3.93572	8.29481e-05	0.00191435
ENSG00000087502.17,ERGIC2,protein_coding	988.922	0.493455	0.499465	0.125404	3.93492	8.32234e-05	0.00191777
ENSG00000132825.6,PPP1R3D,protein_coding	151.412	-0.802347	-0.832693	0.203902	-3.93497	8.32065e-05	0.00191777
ENSG00000019549.8,SNAI2,protein_coding	212.203	-1.58677	-1.86141	0.403274	-3.93471	8.32982e-05	0.00191802
ENSG00000183090.5,FREM3,protein_coding	15.3454	2.21445	4.23779	0.562825	3.93452	8.33622e-05	0.00191803
ENSG00000198740.8,ZNF652,protein_coding	1738.47	0.53163	0.539802	0.135189	3.93248	8.40746e-05	0.00193294
ENSG00000138395.14,CDK15,protein_coding	17.0304	-1.50623	-1.74552	0.3831	-3.93169	8.43504e-05	0.00193781
ENSG00000154451.14,GBP5,protein_coding	225.123	-1.58194	-1.86246	0.402393	-3.93134	8.4475e-05	0.00193919
ENSG00000280276.1,RP11-314C9.1,TEC	2.26929	-2.20873	-4.42274	0.56194	-3.93055	8.47522e-05	0.00194241
ENSG00000172578.11,KLHL6,protein_coding	249.964	-1.32323	-1.46647	0.336647	-3.93061	8.47292e-05	0.00194241
ENSG00000100258.17,LMF2,protein_coding	620.115	-0.881611	-0.919648	0.224306	-3.93039	8.48086e-05	0.00194241
ENSG00000106415.12,GLCCI1,protein_coding	1383.38	1.30141	1.43392	0.331162	3.92982	8.50099e-05	0.00194554
ENSG00000243646.8,IL10RB,protein_coding	281.463	-0.692329	-0.707944	0.176224	-3.92869	8.54112e-05	0.00195324
ENSG00000278546.1,RP1-41C23.4,lincRNA	6.01916	-1.73958	-2.14104	0.442855	-3.9281	8.56197e-05	0.00195652
ENSG00000151692.14,RNF144A,protein_coding	1176.62	0.994193	1.044	0.25312	3.92775	8.5744e-05	0.00195786
ENSG00000145824.12,CXCL14,protein_coding	344.896	-1.74064	-2.1421	0.443186	-3.92757	8.58081e-05	0.00195786
ENSG00000105939.12,ZC3HAV1,protein_coding	1861.65	-0.698074	-0.715121	0.177764	-3.92698	8.60187e-05	0.00196118
ENSG00000279497.1,RP11-654C20.1,TEC	44.2357	1.70573	2.09506	0.434495	3.92577	8.64538e-05	0.0019696
ENSG00000143387.12,CTSK,protein_coding	222.995	-1.09389	-1.16926	0.2787	-3.92497	8.67402e-05	0.00197463
ENSG00000241839.9,PLEKHO2,protein_coding	846.891	-0.70676	-0.726123	0.180099	-3.92429	8.69872e-05	0.00197876
ENSG00000238151.1,MLLT10P1,processed_pseudogene	1.69826	2.14946	5.90142	0.54784	3.92351	8.72672e-05	0.00198363
ENSG00000117984.12,CTSD,protein_coding	2800.5	-1.0567	-1.1232	0.26935	-3.92316	8.73944e-05	0.00198503
ENSG00000234229.7,LINC01505,lincRNA	1.71257	2.19325	5.18344	0.5593	3.92143	8.80267e-05	0.00199487
ENSG00000232653.8,GOLGA8N,protein_coding	738.247	-1.15096	-1.24582	0.293497	-3.92154	8.79833e-05	0.00199487
ENSG00000103037.11,SETD6,protein_coding	552.662	0.738063	0.759044	0.188208	3.92152	8.7991e-05	0.00199487
ENSG00000186517.13,ARHGAP30,protein_coding	257.056	-1.1121	-1.19249	0.283638	-3.92085	8.82368e-05	0.00199813
ENSG00000238121.5,LINC00426,lincRNA	7.44115	-1.96855	-2.66469	0.502148	-3.92027	8.84504e-05	0.00200146
ENSG00000169760.17,NLGN1,protein_coding	2087.33	0.880475	0.918906	0.224617	3.9199	8.85859e-05	0.00200303
ENSG00000143412.9,ANXA9,protein_coding	4.61228	-1.94757	-2.65687	0.496871	-3.91966	8.8674e-05	0.00200351
ENSG00000123146.19,ADGRE5,protein_coding	445.151	-1.34708	-1.45863	0.343709	-3.91923	8.88308e-05	0.00200555
ENSG00000074621.13,SLC24A1,protein_coding	276.771	-0.917074	-0.963385	0.234025	-3.9187	8.90268e-05	0.00200803
ENSG00000141968.7,VAV1,protein_coding	124.306	-1.17605	-1.27252	0.300121	-3.91858	8.90738e-05	0.00200803
ENSG00000185477.4,GPRIN3,protein_coding	840.018	-1.04804	-1.11388	0.267496	-3.91796	8.9303e-05	0.00201169
ENSG00000125520.13,SLC2A4RG,protein_coding	381.352	-1.00908	-1.06924	0.25762	-3.91693	8.96853e-05	0.00201879
ENSG00000010072.15,SPRTN,protein_coding	301.715	0.599298	0.611025	0.153068	3.91523	9.03174e-05	0.0020315
ENSG00000133116.7,KL,protein_coding	30.3663	-1.77866	-2.22194	0.454443	-3.91393	9.08054e-05	0.00204095
ENSG00000172890.11,NADSYN1,protein_coding	1243.64	-0.554762	-0.563549	0.141785	-3.91271	9.12668e-05	0.00204979
ENSG00000150938.9,CRIM1,protein_coding	1344.11	-1.1367	-1.20244	0.29064	-3.91103	9.19021e-05	0.00206252
ENSG00000186300.11,ZNF555,protein_coding	641.131	0.870787	0.908475	0.222728	3.90965	9.24314e-05	0.00207286
ENSG00000172935.8,MRGPRF,protein_coding	56.0918	-1.67459	-2.02791	0.428392	-3.90902	9.26706e-05	0.00207668
ENSG00000163359.15,COL6A3,protein_coding	2499.47	-1.87636	-2.46782	0.480069	-3.90852	9.28619e-05	0.00207787
ENSG00000092068.18,SLC7A8,protein_coding	286.066	-1.40208	-1.60059	0.358714	-3.90862	9.28231e-05	0.00207787
ENSG00000154027.18,AK5,protein_coding	169.164	1.86635	2.47617	0.477592	3.90782	9.31326e-05	0.00208084
ENSG00000169105.7,CHST14,protein_coding	218.512	-0.777006	-0.801596	0.198827	-3.90795	9.30822e-05	0.00208084
ENSG00000144681.10,STAC,protein_coding	128.235	-2.09692	-3.43066	0.536684	-3.90718	9.33808e-05	0.00208329
ENSG00000150275.17,PCDH15,protein_coding	783.653	2.11509	3.59877	0.541316	3.90732	9.33257e-05	0.00208329
ENSG00000267364.1,RP11-47L3.1,lincRNA	1.65385	-2.08659	-3.23461	0.534112	-3.90665	9.35832e-05	0.00208626
ENSG00000180448.10,HMHA1,protein_coding	276.986	-1.14973	-1.23957	0.294386	-3.90552	9.40237e-05	0.00209453
ENSG00000127507.17,ADGRE2,protein_coding	329.209	-1.08328	-1.15809	0.27759	-3.90245	9.52221e-05	0.00211966
ENSG00000228624.7,RP3-399L15.3,antisense	44.7374	1.20441	1.30281	0.308852	3.89963	9.63406e-05	0.00214139
ENSG00000165209.18,STRBP,protein_coding	705.037	0.80062	0.827301	0.205299	3.89977	9.62822e-05	0.00214139
ENSG00000165443.11,PHYHIPL,protein_coding	1017.85	1.35753	1.51839	0.348138	3.89939	9.64345e-05	0.0021419
ENSG00000055732.12,MCOLN3,protein_coding	36.8385	-1.99721	-2.82905	0.51227	-3.89873	9.66966e-05	0.00214614
ENSG00000112531.16,QKI,protein_coding	24513.5	0.744013	0.767893	0.190864	3.89813	9.69382e-05	0.00214992
ENSG00000160446.18,ZDHHC12,protein_coding	86.8668	-1.04169	-1.09978	0.267294	-3.89717	9.73221e-05	0.00215525
ENSG00000196081.9,ZNF724P,protein_coding	330.292	0.956419	1.00518	0.245412	3.8972	9.73132e-05	0.00215525
ENSG00000121966.6,CXCR4,protein_coding	513.02	-1.14243	-1.23672	0.293253	-3.89573	9.79042e-05	0.00216655
ENSG00000182010.10,RTKN2,protein_coding	376.973	1.29632	1.42072	0.332776	3.89547	9.80088e-05	0.00216728
ENSG00000134363.11,FST,protein_coding	63.5448	-1.90578	-2.79337	0.489287	-3.895	9.81974e-05	0.00216928
ENSG00000139192.11,TAPBPL,protein_coding	165.644	-0.877542	-0.914726	0.225314	-3.89476	9.8297e-05	0.00216928
ENSG00000186812.12,ZNF397,protein_coding	2017.7	0.818262	0.845688	0.210096	3.89471	9.83156e-05	0.00216928
ENSG00000134343.12,ANO3,protein_coding	54.5255	1.88865	2.44966	0.485038	3.89381	9.86803e-05	0.00217574
ENSG00000171033.12,PKIA,protein_coding	792.796	1.44754	1.64981	0.371903	3.89224	9.93215e-05	0.00218667
ENSG00000196470.11,SIAH1,protein_coding	603.66	0.595827	0.606604	0.153076	3.89236	9.92726e-05	0.00218667
ENSG00000081923.10,ATP8B1,protein_coding	107.39	-1.08671	-1.16134	0.279274	-3.89121	9.97436e-05	0.00219436
ENSG00000138764.13,CCNG2,protein_coding	630.396	0.842833	0.873619	0.216627	3.89072	9.99487e-05	0.00219727
ENSG00000187601.4,MAGEH1,protein_coding	237.628	1.23003	1.34103	0.316257	3.88934	0.000100515	0.00220811
ENSG00000151640.12,DPYSL4,protein_coding	294.496	1.00269	1.05142	0.257874	3.88829	0.000100952	0.00221609
ENSG00000122435.9,TRMT13,protein_coding	527.909	0.659652	0.675248	0.169668	3.8879	0.000101116	0.00221683
ENSG00000163602.9,RYBP,protein_coding	742.632	0.629547	0.644031	0.161927	3.88786	0.000101133	0.00221683
ENSG00000260837.1,RP11-434B12.1,lincRNA	51.456	1.26803	1.40156	0.326289	3.88622	0.000101818	0.0022271
ENSG00000067064.10,IDI1,protein_coding	383.726	0.851995	0.898154	0.219236	3.8862	0.000101824	0.0022271
ENSG00000183484.11,GPR132,protein_coding	50.4327	-1.40863	-1.58992	0.362454	-3.88638	0.000101751	0.0022271
ENSG00000242808.7,SOX2-OT,sense_overlapping	3933.52	0.951728	0.999249	0.244965	3.88516	0.000102261	0.00223504
ENSG00000198711.5,SSBP3-AS1,antisense	14.872	1.75286	2.2018	0.45122	3.88471	0.000102452	0.00223759
ENSG00000196155.12,PLEKHG4,protein_coding	81.9925	-1.54731	-1.80399	0.398331	-3.88448	0.000102551	0.00223813
ENSG00000114019.14,AMOTL2,protein_coding	943.445	1.09111	1.16319	0.280968	3.88341	0.000103003	0.00224476
ENSG00000174125.7,TLR1,protein_coding	355.54	-0.967229	-1.0169	0.249059	-3.88354	0.000102947	0.00224476
ENSG00000145216.15,FIP1L1,protein_coding	942.851	1.13063	1.21835	0.291177	3.88297	0.000103188	0.00224623
ENSG00000229036.7,VDAC1P8,transcribed_processed_pseudogene	58.1404	0.947289	0.995193	0.243965	3.8829	0.00010322	0.00224623
ENSG00000160654.9,CD3G,protein_coding	9.84372	-1.80493	-2.27467	0.464903	-3.88237	0.000103442	0.00224943
ENSG00000268949.1,MRPS17P1,processed_pseudogene	5.2358	1.97981	2.80078	0.509987	3.88208	0.000103566	0.00225051
ENSG00000184221.12,OLIG1,protein_coding	1125.29	1.43189	1.62415	0.368876	3.88178	0.000103695	0.00225168
ENSG00000139567.12,ACVRL1,protein_coding	200.392	-1.10804	-1.18787	0.285502	-3.88101	0.000104025	0.00225723
ENSG00000261888.1,AC144831.1,lincRNA	50.8952	-1.41445	-1.59846	0.364535	-3.88015	0.000104391	0.00226353
ENSG00000124374.8,PAIP2B,protein_coding	313.459	1.71497	2.11164	0.442016	3.87989	0.000104504	0.00226436
ENSG00000170955.9,PRKCDBP,protein_coding	44.1155	-1.79768	-2.29129	0.463441	-3.87899	0.000104891	0.00227111
ENSG00000111371.15,SLC38A1,protein_coding	2626.22	1.07512	1.15176	0.277245	3.87787	0.000105374	0.00227992
ENSG00000178187.7,ZNF454,protein_coding	231.423	0.780393	0.805276	0.201309	3.87659	0.000105932	0.00228635
ENSG00000151025.9,GPR158,protein_coding	815.319	1.16974	1.28686	0.30175	3.87653	0.000105955	0.00228635
ENSG00000227165.7,WDR11-AS1,antisense	48.7313	1.5411	1.80359	0.39755	3.87649	0.000105975	0.00228635
ENSG00000165240.17,ATP7A,protein_coding	619.401	0.524063	0.53181	0.135189	3.87653	0.000105959	0.00228635
ENSG00000136854.17,STXBP1,protein_coding	965.126	0.966253	1.01211	0.249305	3.87579	0.000106279	0.00229128
ENSG00000123552.17,USP45,protein_coding	374.126	0.766792	0.792679	0.197857	3.87549	0.000106412	0.0022925
ENSG00000130939.18,UBE4B,protein_coding	1125.24	0.478974	0.485233	0.123638	3.87401	0.000107061	0.00230346
ENSG00000054598.6,FOXC1,protein_coding	209.931	-1.11122	-1.19504	0.286841	-3.87398	0.000107073	0.00230346
ENSG00000177556.11,ATOX1,protein_coding	267.468	-0.589679	-0.600043	0.152225	-3.87374	0.000107176	0.00230402
ENSG00000151806.13,GUF1,protein_coding	787.119	0.487065	0.492928	0.125763	3.87287	0.00010756	0.00231061
ENSG00000107643.15,MAPK8,protein_coding	823.039	0.867776	0.903296	0.224099	3.87229	0.000107817	0.00231143
ENSG00000177105.9,RHOG,protein_coding	261.117	-0.817769	-0.848099	0.211205	-3.87192	0.000107981	0.00231143
ENSG00000133794.17,ARNTL,protein_coding	508.871	-0.728225	-0.747129	0.188077	-3.87195	0.000107968	0.00231143
ENSG00000132517.14,SLC52A1,protein_coding	7.54387	-1.86851	-2.44553	0.482559	-3.87208	0.000107912	0.00231143
ENSG00000105287.12,PRKD2,protein_coding	407.937	-0.727505	-0.747826	0.187869	-3.87239	0.000107771	0.00231143
ENSG00000184307.13,ZDHHC23,protein_coding	502.317	-1.36578	-1.50953	0.352779	-3.87149	0.000108172	0.00231387
ENSG00000164663.13,USP49,protein_coding	862.005	1.06487	1.13321	0.275077	3.87117	0.000108316	0.00231408
ENSG00000234502.2,FYTTD1P1,processed_pseudogene	2.81271	2.04593	3.2786	0.52851	3.87112	0.000108336	0.00231408
ENSG00000091490.10,SEL1L3,protein_coding	557.602	-1.3806	-1.57073	0.35701	-3.86713	0.000110124	0.00234906
ENSG00000248383.4,PCDHAC1,protein_coding	207.186	0.771917	0.798186	0.19961	3.86712	0.000110129	0.00234906
ENSG00000160678.11,S100A1,protein_coding	73.8522	1.81324	2.3808	0.468966	3.86648	0.000110419	0.00235115
ENSG00000204970.9,PCDHA1,protein_coding	19.5386	2.08938	3.38376	0.540398	3.86638	0.000110462	0.00235115
ENSG00000149257.13,SERPINH1,protein_coding	1101.04	-1.19122	-1.29208	0.308087	-3.86651	0.000110405	0.00235115
ENSG00000069712.10,KIAA1107,protein_coding	297.998	1.24112	1.35305	0.321042	3.86592	0.000110671	0.00235228
ENSG00000103534.16,TMC5,protein_coding	3.50208	2.05678	3.28501	0.53201	3.86605	0.000110613	0.00235228
ENSG00000256751.5,PLBD1-AS1,antisense	8.88138	-1.63576	-1.93676	0.423191	-3.86529	0.000110959	0.00235668
ENSG00000257557.2,RP11-84G21.1,antisense	57.6909	1.27692	1.38188	0.33037	3.86512	0.000111034	0.00235668
ENSG00000213420.7,GPC2,protein_coding	340.407	1.32823	1.47407	0.343665	3.8649	0.000111136	0.00235718
ENSG00000128606.12,LRRC17,protein_coding	137.872	-1.20231	-1.30956	0.311147	-3.86411	0.000111493	0.0023631
ENSG00000122224.17,LY9,protein_coding	9.13438	-1.67125	-2.01841	0.432554	-3.86368	0.000111692	0.00236398
ENSG00000258915.1,BHLHB9P1,processed_pseudogene	12.2787	2.15578	4.02852	0.557945	3.86379	0.000111643	0.00236398
ENSG00000170571.11,EMB,protein_coding	253.033	-1.28832	-1.42446	0.333516	-3.86286	0.000112069	0.00236696
ENSG00000184988.8,TMEM106A,protein_coding	357.409	-0.922403	-0.968081	0.238783	-3.86293	0.000112035	0.00236696
ENSG00000264247.1,LINC00909,lincRNA	291.754	0.754749	0.780478	0.195378	3.86302	0.000111996	0.00236696
ENSG00000183828.14,NUDT14,protein_coding	56.3812	-1.15975	-1.25158	0.300245	-3.86266	0.000112157	0.00236717
ENSG00000139292.12,LGR5,protein_coding	78.7598	1.8266	2.30982	0.47295	3.86215	0.000112395	0.00237053
ENSG00000109771.15,LRP2BP,protein_coding	403.649	1.11847	1.20647	0.289662	3.86131	0.000112779	0.00237363
ENSG00000007866.18,TEAD3,protein_coding	177.115	-1.22926	-1.34251	0.31833	-3.86158	0.000112655	0.00237363
ENSG00000175387.15,SMAD2,protein_coding	4284.02	0.582434	0.593007	0.150833	3.86144	0.000112719	0.00237363
ENSG00000241399.6,CD302,protein_coding	604.409	-1.09054	-1.16545	0.282463	-3.86084	0.000112998	0.00237659
ENSG00000164107.8,HAND2,protein_coding	30.1715	1.99928	2.75076	0.518194	3.85817	0.000114238	0.00240099
ENSG00000140459.17,CYP11A1,protein_coding	7.53901	-1.88749	-2.43472	0.489336	-3.85725	0.000114669	0.00240838
ENSG00000215612.6,HMX1,protein_coding	33.6029	2.06811	2.90686	0.5362	3.85698	0.000114797	0.00240939
ENSG00000144908.13,ALDH1L1,protein_coding	1425.36	-1.31999	-1.46167	0.342265	-3.85664	0.000114957	0.00241106
ENSG00000155592.15,ZKSCAN2,protein_coding	520.9	0.634166	0.647238	0.164459	3.85607	0.000115225	0.002415
ENSG00000129951.18,PLPPR3,protein_coding	25.6532	2.11026	3.5682	0.54735	3.85542	0.000115532	0.00241975
ENSG00000101079.20,NDRG3,protein_coding	618.132	0.808741	0.8393	0.209778	3.85523	0.000115621	0.00241992
ENSG00000103460.16,TOX3,protein_coding	311.346	1.86767	2.47395	0.484486	3.85496	0.000115748	0.00242089
ENSG00000128340.14,RAC2,protein_coding	79.5648	-1.01046	-1.0711	0.262223	-3.85344	0.000116471	0.00243434
ENSG00000126456.15,IRF3,protein_coding	532.191	-0.916484	-0.960154	0.237862	-3.85301	0.000116675	0.0024369
ENSG00000065308.4,TRAM2,protein_coding	913.581	-0.928751	-0.974499	0.241082	-3.85242	0.000116956	0.00244108
ENSG00000107951.12,MTPAP,protein_coding	474.29	0.807748	0.837874	0.209686	3.85218	0.00011707	0.00244177
ENSG00000181450.17,ZNF678,protein_coding	937.442	0.887892	0.929059	0.230523	3.85165	0.000117326	0.00244372
ENSG00000081059.19,TCF7,protein_coding	180.304	-1.06948	-1.14644	0.27766	-3.85175	0.000117275	0.00244372
ENSG00000172260.13,NEGR1,protein_coding	400.722	1.93836	2.68438	0.5033	3.8513	0.000117492	0.00244455
ENSG00000279207.1,RP11-159D12.8,TEC	693.537	1.06559	1.14074	0.276688	3.85123	0.000117528	0.00244455
ENSG00000163564.14,PYHIN1,protein_coding	7.59178	-2.03669	-3.03997	0.528888	-3.85089	0.000117692	0.00244626
ENSG00000279965.1,RP11-472K17.3,TEC	46.1114	-1.44884	-1.65121	0.376257	-3.85068	0.00011779	0.00244662
ENSG00000230327.1,MTCO1P42,processed_pseudogene	51.9558	1.81496	2.3961	0.471408	3.85008	0.000118079	0.00245094
ENSG00000163002.12,NUP35,protein_coding	219.873	0.74243	0.768492	0.192897	3.84885	0.000118676	0.00246162
ENSG00000198153.8,ZNF849P,unprocessed_pseudogene	5.50727	2.08054	3.52674	0.540702	3.84786	0.000119156	0.00246989
ENSG00000134265.12,NAPG,protein_coding	830.837	0.510941	0.518619	0.132796	3.84757	0.000119296	0.00247108
ENSG00000123191.14,ATP7B,protein_coding	186.391	1.09754	1.17729	0.285314	3.8468	0.000119669	0.00247711
ENSG00000054392.12,HHAT,protein_coding	120.325	-1.11174	-1.2065	0.289054	-3.84612	0.000120005	0.00248236
ENSG00000156232.7,WHAMM,protein_coding	297.647	-0.582308	-0.593842	0.151419	-3.84567	0.000120222	0.00248514
ENSG00000184194.5,GPR173,protein_coding	1091.51	0.809571	0.83724	0.210568	3.8447	0.000120698	0.00249327
ENSG00000243544.3,RN7SL172P,misc_RNA	6.04354	-1.83293	-2.39275	0.476907	-3.84337	0.000121354	0.00250232
ENSG00000126500.3,FLRT1,protein_coding	194.799	1.44591	1.65696	0.37622	3.84324	0.000121418	0.00250232
ENSG00000127328.21,RAB3IP,protein_coding	2529.96	1.45646	1.67031	0.378976	3.84314	0.000121469	0.00250232
ENSG00000169783.12,LINGO1,protein_coding	416.5	1.33064	1.47642	0.346224	3.84328	0.000121398	0.00250232
ENSG00000214106.7,PAXIP1-AS2,antisense	178.58	-0.987401	-1.04933	0.256947	-3.84282	0.000121627	0.00250386
ENSG00000265241.6,RBM8A,protein_coding	2096.2	0.57566	0.587852	0.149832	3.84204	0.000122014	0.00250884
ENSG00000185432.11,METTL7A,protein_coding	2294.14	-1.08948	-1.15625	0.283571	-3.842	0.000122035	0.00250884
ENSG00000125611.15,CHCHD5,protein_coding	109.228	0.64822	0.664121	0.168744	3.84145	0.000122312	0.00251282
ENSG00000196460.12,RFX8,protein_coding	22.9609	-1.86341	-2.42895	0.485174	-3.8407	0.000122682	0.0025184
ENSG00000225393.1,RP11-218L14.4,antisense	6.17329	-1.90694	-2.54691	0.496526	-3.84057	0.000122751	0.0025184
ENSG00000184675.9,AMER1,protein_coding	517.956	0.839815	0.871037	0.218683	3.84032	0.000122874	0.00251921
ENSG00000142669.13,SH3BGRL3,protein_coding	701.647	-0.753933	-0.776821	0.196379	-3.83917	0.00012345	0.0025293
ENSG00000166278.14,C2,protein_coding	240.66	-1.36848	-1.53766	0.356474	-3.83894	0.000123566	0.00252995
ENSG00000111605.16,CPSF6,protein_coding	2856.87	0.677788	0.694956	0.176567	3.83871	0.000123684	0.00253065
ENSG00000150394.13,CDH8,protein_coding	122.943	1.89598	2.64015	0.494016	3.83789	0.000124094	0.00253731
ENSG00000184500.14,PROS1,protein_coding	694.578	-1.09663	-1.17621	0.285761	-3.83757	0.00012426	0.00253898
ENSG00000172466.15,ZNF24,protein_coding	2821.01	0.449259	0.454976	0.117101	3.83652	0.00012479	0.00254691
ENSG00000278041.1,RP5-984P4.6,lincRNA	468.001	1.21635	1.32028	0.31705	3.83647	0.000124817	0.00254691
ENSG00000160229.11,ZNF66,protein_coding	239.671	0.951129	0.997392	0.247987	3.8354	0.000125361	0.00255629
ENSG00000110011.13,DNAJC4,protein_coding	162.703	-0.777389	-0.803586	0.202714	-3.8349	0.000125614	0.00255812
ENSG00000260062.3,GOLGA2P11,transcribed_unprocessed_pseudogene	1.78752	-2.15036	-6.02375	0.560736	-3.83489	0.000125621	0.00255812
ENSG00000239626.1,RPSAP41,processed_pseudogene	11.1869	1.84584	2.48925	0.481474	3.83373	0.000126212	0.00256842
ENSG00000198208.11,RPS6KL1,protein_coding	452.976	1.05813	1.1248	0.276024	3.83348	0.000126342	0.00256933
ENSG00000235888.1,AF064858.8,lincRNA	4.81025	1.62214	2.00509	0.423209	3.83296	0.000126612	0.00257307
ENSG00000173175.14,ADCY5,protein_coding	285.774	1.2102	1.3193	0.315796	3.83223	0.000126987	0.00257722
ENSG00000180616.8,SSTR2,protein_coding	175.503	1.5166	1.76244	0.395742	3.8323	0.000126951	0.00257722
ENSG00000122824.10,NUDT10,protein_coding	116.6	1.26755	1.38458	0.330858	3.83109	0.000127576	0.00258743
ENSG00000101126.15,ADNP,protein_coding	3126.29	0.411328	0.415298	0.107371	3.8309	0.000127674	0.00258767
ENSG00000270055.1,CTD-3092A11.2,sense_intronic	269.1	-1.16916	-1.28122	0.305261	-3.83003	0.000128129	0.00259516
ENSG00000185278.14,ZBTB37,protein_coding	3390.81	0.837247	0.871408	0.218695	3.82838	0.000128989	0.00260905
ENSG00000104112.8,SCG3,protein_coding	840.496	1.38615	1.56833	0.362065	3.82846	0.000128947	0.00260905
ENSG00000237732.9,AC010980.2,transcribed_unprocessed_pseudogene	8.21439	2.07233	3.23957	0.541448	3.82739	0.000129511	0.00261661
ENSG00000070087.13,PFN2,protein_coding	2709.09	1.1095	1.18733	0.289889	3.82734	0.000129536	0.00261661
ENSG00000247400.3,DNAJC3-AS1,lincRNA	105.258	0.77327	0.800212	0.202048	3.82715	0.000129634	0.00261683
ENSG00000198221.8,MLLT4-AS1,lincRNA	30.0491	1.55476	1.84024	0.406331	3.82633	0.000130068	0.00262384
ENSG00000213362.3,FTH1P12,processed_pseudogene	1.51448	-2.08672	-3.42517	0.545406	-3.826	0.000130243	0.00262561
ENSG00000084234.16,APLP2,protein_coding	4663.24	-0.919108	-0.951278	0.240242	-3.82575	0.000130372	0.00262646
ENSG00000120318.15,ARAP3,protein_coding	898.254	-1.26883	-1.39532	0.331702	-3.82522	0.000130656	0.00263035
ENSG00000095794.19,CREM,protein_coding	221.7	-0.817452	-0.844482	0.213717	-3.82493	0.000130809	0.00263035
ENSG00000101986.11,ABCD1,protein_coding	235.621	-0.760407	-0.785592	0.198805	-3.8249	0.000130827	0.00263035
ENSG00000116774.11,OLFML3,protein_coding	399.338	-1.06485	-1.13402	0.278463	-3.82404	0.000131283	0.00263649
ENSG00000205502.3,C2CD4B,protein_coding	7.02579	-2.05383	-2.93076	0.537091	-3.82399	0.000131308	0.00263649
ENSG00000148123.14,PLPPR1,protein_coding	424.012	2.01234	2.99278	0.526287	3.82366	0.000131485	0.00263653
ENSG00000129566.12,TEP1,protein_coding	1308.77	-0.516693	-0.524385	0.135129	-3.82371	0.000131457	0.00263653
ENSG00000226828.1,RP11-278H7.1,lincRNA	7.04727	2.07017	3.05035	0.541481	3.82317	0.000131748	0.00264005
ENSG00000154080.12,CHST9,protein_coding	908.99	1.744	2.19697	0.456297	3.82207	0.000132335	0.00265004
ENSG00000132681.16,ATP1A4,protein_coding	30.064	1.7918	2.41663	0.468892	3.82136	0.000132718	0.00265595
ENSG00000100979.14,PLTP,protein_coding	1463.87	-1.28155	-1.41962	0.335399	-3.82097	0.000132928	0.00265838
ENSG00000153015.15,CWC27,protein_coding	367.469	0.556591	0.566326	0.145679	3.82066	0.000133094	0.00265994
ENSG00000221869.4,CEBPD,protein_coding	879.002	-1.09966	-1.18087	0.287836	-3.82044	0.000133215	0.00266059
ENSG00000019582.14,CD74,protein_coding	6265.22	-1.21166	-1.32597	0.317172	-3.82019	0.000133349	0.0026615
ENSG00000219023.1,RP3-340B19.2,processed_pseudogene	6.81306	-2.14782	-3.72373	0.562352	-3.81936	0.000133799	0.00266705
ENSG00000214029.4,ZNF891,protein_coding	1689.7	0.959295	1.00862	0.251167	3.81935	0.000133804	0.00266705
ENSG00000188846.13,RPL14,protein_coding	2210.1	0.690718	0.711452	0.180872	3.81883	0.000134088	0.00267095
ENSG00000126368.5,NR1D1,protein_coding	253.78	-1.19704	-1.32015	0.313551	-3.81768	0.000134714	0.00268163
ENSG00000166091.19,CMTM5,protein_coding	117.837	1.47479	1.70977	0.386437	3.81638	0.000135422	0.00269395
ENSG00000141448.8,GATA6,protein_coding	16.4765	-2.03121	-2.993	0.532437	-3.81494	0.000136218	0.002708
ENSG00000164221.12,CCDC112,protein_coding	241.956	0.943557	0.997988	0.247349	3.81467	0.000136364	0.00270911
ENSG00000153208.16,MERTK,protein_coding	788.093	-0.980351	-1.03385	0.257037	-3.81405	0.000136706	0.00271412
ENSG00000111713.2,GYS2,protein_coding	4.79468	1.74597	2.30148	0.457931	3.81275	0.00013743	0.00272669
ENSG00000145920.14,CPLX2,protein_coding	473.152	2.0499	3.28091	0.537668	3.81258	0.000137522	0.00272671
ENSG00000165511.6,C10orf25,antisense	41.2204	1.10813	1.19349	0.290733	3.8115	0.000138124	0.00273506
ENSG00000125851.9,PCSK2,protein_coding	107.952	1.99459	2.75535	0.523302	3.81155	0.000138097	0.00273506
ENSG00000116668.12,SWT1,protein_coding	265.584	0.545289	0.555058	0.143082	3.81103	0.000138391	0.00273855
ENSG00000224812.2,TMEM72-AS1,antisense	26.1379	1.36737	1.53964	0.358814	3.8108	0.000138516	0.00273921
ENSG00000104774.12,MAN2B1,protein_coding	714.723	-0.762713	-0.786964	0.200251	-3.80879	0.000139648	0.00275978
ENSG00000223572.9,CKMT1A,protein_coding	25.4379	1.9572	2.73321	0.513906	3.80849	0.000139819	0.00276135
ENSG00000127585.11,FBXL16,protein_coding	449.221	1.4726	1.68362	0.38675	3.80763	0.000140308	0.00276919
ENSG00000162378.12,ZYG11B,protein_coding	1931.15	0.546877	0.557088	0.14368	3.80621	0.00014111	0.0027832
ENSG00000164975.15,SNAPC3,protein_coding	1353.66	0.79811	0.826431	0.209715	3.80568	0.000141413	0.00278735
ENSG00000124491.15,F13A1,protein_coding	652.59	-1.59983	-1.90793	0.420419	-3.80533	0.000141614	0.00278949
ENSG00000129009.12,ISLR,protein_coding	178.851	-1.85259	-2.46521	0.486941	-3.80455	0.000142061	0.00279646
ENSG00000246022.2,ALDH1L1-AS2,antisense	44.9228	-1.74873	-2.24232	0.459689	-3.80416	0.000142286	0.00279723
ENSG00000196741.5,LINC01560,lincRNA	61.5642	1.17682	1.27976	0.309346	3.80422	0.000142254	0.00279723
ENSG00000156467.9,UQCRB,protein_coding	976.793	0.636605	0.653316	0.167362	3.80376	0.000142519	0.00279817
ENSG00000066336.11,SPI1,protein_coding	234.545	-0.965036	-1.01923	0.253698	-3.80388	0.000142448	0.00279817
ENSG00000116329.10,OPRD1,protein_coding	202.179	1.87936	2.57664	0.494129	3.80338	0.000142737	0.00280025
ENSG00000147588.6,PMP2,protein_coding	11102.4	1.2846	1.43069	0.337763	3.80325	0.000142811	0.00280025
ENSG00000165970.11,SLC6A5,protein_coding	5.39804	2.11138	4.39714	0.555402	3.80154	0.000143801	0.00281783
ENSG00000115896.15,PLCL1,protein_coding	342.483	1.32997	1.48544	0.349891	3.80109	0.000144061	0.00281925
ENSG00000132386.10,SERPINF1,protein_coding	262.321	-1.37489	-1.54597	0.361694	-3.80124	0.000143972	0.00281925
ENSG00000205269.5,TMEM170B,protein_coding	1189.93	0.891085	0.934155	0.234462	3.80056	0.000144371	0.00282308
ENSG00000279387.1,CTC-525D6.3,TEC	21.3806	2.09066	4.05297	0.55011	3.80043	0.000144444	0.00282308
ENSG00000231782.6,LINC00575,lincRNA	5.15894	1.83769	2.53649	0.483591	3.8001	0.000144639	0.00282505
ENSG00000174672.15,BRSK2,protein_coding	363.454	1.54188	1.80609	0.405778	3.79981	0.000144806	0.00282648
ENSG00000279355.1,AGPAT4-IT1,TEC	281.22	1.06729	1.13959	0.280905	3.79949	0.000144997	0.00282838
ENSG00000134107.4,BHLHE40,protein_coding	1925.96	-1.08242	-1.16538	0.284942	-3.79873	0.000145441	0.00283511
ENSG00000109189.12,USP46,protein_coding	843.489	0.559734	0.56948	0.147354	3.79858	0.00014553	0.00283511
ENSG00000156097.12,GPR61,protein_coding	28.308	1.86465	2.56844	0.490984	3.79778	0.000145995	0.00284233
ENSG00000006607.13,FARP2,protein_coding	1251.63	0.749059	0.773067	0.197254	3.79743	0.000146203	0.00284454
ENSG00000224905.6,AP001347.6,antisense	28.3136	1.44853	1.66482	0.381601	3.79592	0.000147095	0.00286005
ENSG00000150907.6,FOXO1,protein_coding	1538.34	-1.06137	-1.12304	0.27964	-3.7955	0.000147347	0.00286205
ENSG00000269793.5,ZIM2-AS1,antisense	62.9115	1.32861	1.48673	0.350056	3.79543	0.000147388	0.00286205
ENSG00000007174.17,DNAH9,protein_coding	693.316	-1.46968	-1.72888	0.387398	-3.79373	0.000148403	0.0028799
ENSG00000225299.1,RP11-344A5.1,antisense	11.3283	1.80574	2.5014	0.476139	3.79247	0.000149157	0.00289266
ENSG00000138821.12,SLC39A8,protein_coding	443.955	-1.37874	-1.56013	0.363576	-3.79218	0.000149331	0.00289307
ENSG00000197085.11,NPSR1-AS1,processed_transcript	10.8537	2.03608	3.16748	0.536925	3.79211	0.00014937	0.00289307
ENSG00000259623.1,RP11-156E6.1,sense_overlapping	488.148	0.850081	0.888923	0.22419	3.79178	0.000149572	0.00289512
ENSG00000229585.4,RPL21P44,processed_pseudogene	56.6892	1.70848	2.1145	0.450723	3.79054	0.000150318	0.0029077
ENSG00000228223.2,HCG11,lincRNA	63.6436	-1.30767	-1.46252	0.345	-3.79034	0.000150439	0.00290817
ENSG00000170579.14,DLGAP1,protein_coding	800.135	1.5565	1.84062	0.410706	3.78982	0.000150759	0.00291248
ENSG00000154217.14,PITPNC1,protein_coding	1233.5	0.781646	0.810952	0.206308	3.78874	0.000151413	0.00292324
ENSG00000213120.3,LIN28AP1,processed_pseudogene	1.57748	2.08873	5.1083	0.551327	3.78855	0.000151531	0.00292365
ENSG00000242021.2,RP11-268G12.3,lincRNA	2.30493	2.09379	5.45785	0.552714	3.78821	0.000151738	0.00292577
ENSG00000141384.11,TAF4B,protein_coding	130.789	0.964548	1.02396	0.254635	3.78796	0.000151892	0.00292685
ENSG00000261670.1,RP11-1C8.5,lincRNA	42.3651	1.46529	1.70966	0.386893	3.78733	0.000152277	0.00293241
ENSG00000196628.13,TCF4,protein_coding	10944.1	0.659088	0.675482	0.174058	3.78661	0.000152717	0.00293901
ENSG00000169885.9,CALML6,protein_coding	21.9434	-1.68878	-2.07797	0.446056	-3.78602	0.000153078	0.00294031
ENSG00000144583.4,MARCH4,protein_coding	47.3838	1.58768	1.86306	0.419338	3.78616	0.000152991	0.00294031
ENSG00000101624.10,CEP76,protein_coding	131.299	0.723183	0.748158	0.19101	3.7861	0.00015303	0.00294031
ENSG00000008282.8,SYPL1,protein_coding	896.282	-0.808597	-0.833959	0.213612	-3.78535	0.00015349	0.00294634
ENSG00000173227.13,SYT12,protein_coding	196.841	-1.35967	-1.52313	0.359279	-3.78445	0.000154048	0.00295518
ENSG00000154305.16,MIA3,protein_coding	1692.54	0.423894	0.428547	0.112051	3.78306	0.000154912	0.0029642
ENSG00000144645.13,OSBPL10,protein_coding	377.926	-1.26388	-1.39279	0.334058	-3.7834	0.000154697	0.0029642
ENSG00000276231.4,PIK3R6,protein_coding	57.7592	-1.40435	-1.59905	0.371206	-3.78322	0.000154815	0.0029642
ENSG00000279894.1,GHc-857G6.7,TEC	38.8029	1.41657	1.63012	0.37442	3.78337	0.00015472	0.0029642
ENSG00000061676.14,NCKAP1,protein_coding	3860.28	0.407013	0.411384	0.107611	3.78228	0.0001554	0.00296975
ENSG00000087301.8,TXNDC16,protein_coding	342.34	0.839368	0.880365	0.221916	3.78237	0.00015534	0.00296975
ENSG00000144857.14,BOC,protein_coding	1413.48	-1.09887	-1.17992	0.290813	-3.77861	0.000157708	0.00301196
ENSG00000075420.12,FNDC3B,protein_coding	2381.66	-0.800095	-0.828083	0.211753	-3.77843	0.00015782	0.00301218
ENSG00000237949.1,LINC00844,lincRNA	45.4734	1.67552	2.09828	0.443473	3.77818	0.000157978	0.00301329
ENSG00000170801.9,HTRA3,protein_coding	56.8469	-1.54728	-1.82071	0.409548	-3.77802	0.000158078	0.00301329
ENSG00000184368.15,MAP7D2,protein_coding	65.3364	1.66848	2.10921	0.441737	3.77709	0.00015867	0.00302267
ENSG00000091136.13,LAMB1,protein_coding	2591.29	-1.30879	-1.46008	0.346535	-3.7768	0.000158857	0.00302432
ENSG00000087258.13,GNAO1,protein_coding	1894.39	1.17806	1.28106	0.312031	3.77545	0.000159717	0.00303875
ENSG00000080822.16,CLDND1,protein_coding	1739.44	0.790604	0.825922	0.209459	3.77451	0.000160324	0.00304838
ENSG00000107105.14,ELAVL2,protein_coding	179.066	2.01803	3.08882	0.53469	3.7742	0.000160522	0.00305021
ENSG00000145979.17,TBC1D7,protein_coding	285.537	0.608152	0.62013	0.161144	3.77397	0.000160667	0.00305106
ENSG00000089250.18,NOS1,protein_coding	166.869	2.01351	3.16857	0.533736	3.77248	0.000161633	0.00306747
ENSG00000260766.1,RP11-226L15.5,sense_overlapping	160.324	0.87131	0.910022	0.231049	3.77111	0.000162525	0.00308244
ENSG00000204624.7,PTCHD2,protein_coding	361.283	1.38977	1.57429	0.368578	3.77063	0.000162839	0.00308646
ENSG00000136531.13,SCN2A,protein_coding	770.375	1.13796	1.22278	0.301839	3.77008	0.000163193	0.00308929
ENSG00000158258.15,CLSTN2,protein_coding	1893.97	1.41976	1.61524	0.376576	3.77018	0.00016313	0.00308929
ENSG00000280913.2,CTSLP2,transcribed_unprocessed_pseudogene	4.62505	-2.12603	-4.15269	0.563987	-3.76964	0.000163481	0.0030928
ENSG00000101654.17,RNMT,protein_coding	1286.59	0.592395	0.604347	0.15717	3.76914	0.000163811	0.00309709
ENSG00000127947.15,PTPN12,protein_coding	2510.9	-0.561647	-0.572264	0.149019	-3.76897	0.00016392	0.00309721
ENSG00000267650.1,CTD-2553C6.1,antisense	1.67942	2.11799	4.84206	0.562105	3.76796	0.00016459	0.00310791
ENSG00000213973.8,ZNF99,protein_coding	22.5787	2.02912	3.28664	0.538561	3.76767	0.000164776	0.00310947
ENSG00000147434.8,CHRNA6,protein_coding	10.0337	-2.06807	-3.42461	0.549088	-3.76636	0.000165642	0.00312149
ENSG00000173548.8,SNX33,protein_coding	1036.72	-0.743573	-0.769268	0.197431	-3.76624	0.000165723	0.00312149
ENSG00000087086.13,FTL,protein_coding	10288.9	-1.13827	-1.23304	0.302223	-3.76634	0.00016566	0.00312149
ENSG00000261970.1,RP11-342L8.2,processed_pseudogene	22.6084	1.29317	1.43956	0.343381	3.76599	0.000165891	0.0031227
ENSG00000245870.2,LINC00682,lincRNA	3.10641	2.09185	3.83349	0.555494	3.76575	0.00016605	0.00312373
ENSG00000146247.13,PHIP,protein_coding	2912.08	0.631469	0.646617	0.167734	3.76471	0.00016674	0.00313475
ENSG00000227811.2,FAM212B-AS1,antisense	46.5929	1.04541	1.11281	0.277706	3.76444	0.00016692	0.00313618
ENSG00000214113.10,LYRM4,protein_coding	408.511	0.58948	0.601041	0.156604	3.76415	0.000167115	0.00313789
ENSG00000239697.10,TNFSF12,protein_coding	157.188	-0.873889	-0.914078	0.232194	-3.76362	0.00016747	0.00314259
ENSG00000234380.1,LINC01426,antisense	47.3627	-1.56288	-1.86401	0.415286	-3.76339	0.000167627	0.00314358
ENSG00000257842.5,NOVA1-AS1,antisense	23.9604	1.82549	2.46677	0.485117	3.76298	0.0001679	0.00314479
ENSG00000213391.3,RP11-66N11.6,processed_pseudogene	1.01823	2.09168	4.9943	0.555839	3.76311	0.000167817	0.00314479
ENSG00000196284.13,SUPT3H,protein_coding	171.745	0.949184	0.996711	0.252275	3.7625	0.000168223	0.00314887
ENSG00000115165.9,CYTIP,protein_coding	93.4552	-1.26167	-1.40028	0.33542	-3.76148	0.000168912	0.00315981
ENSG00000011600.11,TYROBP,protein_coding	200.984	-1.16861	-1.2686	0.310778	-3.76028	0.000169724	0.00317303
ENSG00000222041.10,LINC00152,lincRNA	258.168	-1.15128	-1.24843	0.306194	-3.75998	0.000169924	0.0031748
ENSG00000164690.7,SHH,protein_coding	76.6089	-2.11971	-4.19748	0.563977	-3.75851	0.000170929	0.00319125
ENSG00000135723.13,FHOD1,protein_coding	279.423	-0.921849	-0.968386	0.245278	-3.75838	0.000171017	0.00319125
ENSG00000040275.16,SPDL1,protein_coding	310.295	0.591597	0.602452	0.157414	3.75822	0.000171129	0.00319137
ENSG00000228623.3,ZNF883,lincRNA	429.921	1.19029	1.301	0.316834	3.75682	0.000172084	0.00320719
ENSG00000163739.4,CXCL1,protein_coding	24.6383	-1.63588	-2.00701	0.435557	-3.75584	0.000172759	0.00321778
ENSG00000281708.1,ERC2-IT1,sense_intronic	43.8118	1.7383	2.28488	0.462884	3.75536	0.000173095	0.00322065
ENSG00000147650.11,LRP12,protein_coding	581.653	0.697791	0.715696	0.185814	3.75531	0.000173127	0.00322065
ENSG00000128973.11,CLN6,protein_coding	348.385	-0.721872	-0.746741	0.192257	-3.75472	0.000173534	0.00322622
ENSG00000185338.4,SOCS1,protein_coding	23.2682	-1.09344	-1.18542	0.291338	-3.75318	0.000174609	0.00324421
ENSG00000026508.16,CD44,protein_coding	8211.48	-1.0424	-1.11059	0.2778	-3.75233	0.000175197	0.00325313
ENSG00000144036.15,EXOC6B,protein_coding	1443.63	0.464994	0.470462	0.123989	3.75027	0.000176646	0.00327801
ENSG00000112759.16,SLC29A1,protein_coding	319.556	-0.813315	-0.841805	0.216915	-3.74946	0.000177214	0.00328249
ENSG00000118557.15,PMFBP1,protein_coding	68.4135	1.47235	1.71179	0.392673	3.74957	0.000177137	0.00328249
ENSG00000213859.4,KCTD11,protein_coding	179.45	-0.750773	-0.777458	0.200234	-3.74948	0.0001772	0.00328249
ENSG00000174963.17,ZIC4,protein_coding	136.509	-0.995355	-1.05732	0.265496	-3.74904	0.000177516	0.0032838
ENSG00000198001.13,IRAK4,protein_coding	427.343	-0.650919	-0.667638	0.173629	-3.7489	0.000177612	0.0032838
ENSG00000123338.12,NCKAP1L,protein_coding	782.211	-1.04927	-1.122	0.27988	-3.74899	0.000177548	0.0032838
ENSG00000260213.5,RP11-303E16.3,antisense	6.75603	1.93733	2.79463	0.516797	3.74873	0.000177731	0.003284
ENSG00000154016.13,GRAP,protein_coding	88.386	-1.00323	-1.06533	0.267706	-3.74753	0.000178587	0.00329778
ENSG00000164330.16,EBF1,protein_coding	249.282	-1.23131	-1.35817	0.32864	-3.7467	0.000179176	0.0033046
ENSG00000166971.16,AKTIP,protein_coding	495.546	0.637155	0.652095	0.170054	3.74679	0.000179114	0.0033046
ENSG00000107099.15,DOCK8,protein_coding	772.038	-0.936934	-0.986239	0.250096	-3.7463	0.000179462	0.00330786
ENSG00000018408.14,WWTR1,protein_coding	3042.55	-1.05462	-1.12567	0.281591	-3.74521	0.000180244	0.00331821
ENSG00000105270.14,CLIP3,protein_coding	2098.9	0.908327	0.954372	0.24253	3.74521	0.000180241	0.00331821
ENSG00000162402.13,USP24,protein_coding	2790.79	0.508854	0.517119	0.135894	3.7445	0.000180751	0.00332354
ENSG00000054793.13,ATP9A,protein_coding	2977.37	0.88035	0.923274	0.235105	3.7445	0.000180754	0.00332354
ENSG00000012983.11,MAP4K5,protein_coding	1700.61	0.732222	0.754637	0.195574	3.74396	0.000181146	0.0033287
ENSG00000162739.13,SLAMF6,protein_coding	14.9691	-1.85107	-2.44859	0.494532	-3.74307	0.000181787	0.00333846
ENSG00000231389.7,HLA-DPA1,protein_coding	1546.22	-1.28294	-1.42846	0.3428	-3.74253	0.000182179	0.00334361
ENSG00000226520.1,KIRREL-IT1,sense_intronic	25.7811	-1.32592	-1.49213	0.354334	-3.74201	0.000182553	0.0033464
ENSG00000160352.15,ZNF714,protein_coding	1200.52	0.836173	0.871993	0.223453	3.74205	0.000182525	0.0033464
ENSG00000151952.14,TMEM132D,protein_coding	23.4811	2.06812	4.0893	0.552742	3.74156	0.000182878	0.00335032
ENSG00000180834.7,MAP6D1,protein_coding	201.266	1.07684	1.16685	0.287877	3.74061	0.000183574	0.00335942
ENSG00000271063.1,SNRPGP17,processed_pseudogene	6.46922	2.0086	3.24929	0.536975	3.74058	0.000183598	0.00335942
ENSG00000117016.9,RIMS3,protein_coding	520.451	1.23777	1.35146	0.330943	3.74012	0.000183933	0.00336176
ENSG00000188820.12,FAM26F,protein_coding	20.8864	-1.63013	-1.95388	0.435851	-3.7401	0.000183949	0.00336176
ENSG00000272994.1,RP11-332H14.2,lincRNA	212.197	0.853852	0.88988	0.228325	3.73964	0.000184287	0.00336385
ENSG00000267074.1,RP11-1094M14.5,sense_intronic	6.00838	-1.83671	-2.45121	0.491131	-3.73975	0.000184201	0.00336385
ENSG00000274508.1,RP11-212I21.5,lincRNA	1.11966	-2.10528	-4.68377	0.563074	-3.7389	0.000184829	0.0033717
ENSG00000134291.11,TMEM106C,protein_coding	459.082	-1.19577	-1.29156	0.319834	-3.73873	0.000184953	0.00337193
ENSG00000243414.5,TICAM2,protein_coding	145.773	-1.2085	-1.32194	0.323281	-3.73822	0.000185331	0.00337619
ENSG00000242574.8,HLA-DMB,protein_coding	698.522	-1.17258	-1.27982	0.313684	-3.73811	0.000185412	0.00337619
ENSG00000100292.16,HMOX1,protein_coding	1118.68	-1.54786	-1.85205	0.414134	-3.73757	0.000185806	0.00338132
ENSG00000231419.6,LINC00689,processed_transcript	467.151	2.07881	3.82263	0.556255	3.73715	0.00018612	0.00338501
ENSG00000169282.17,KCNAB1,protein_coding	63.2689	1.5582	1.87168	0.417061	3.73613	0.000186873	0.00339664
ENSG00000134061.5,CD180,protein_coding	81.6876	-1.06957	-1.14682	0.286358	-3.73507	0.000187665	0.00340898
ENSG00000135341.17,MAP3K7,protein_coding	1211.2	0.466007	0.472028	0.124805	3.73388	0.000188554	0.00342308
ENSG00000159239.11,C2orf81,protein_coding	79.6391	-0.799105	-0.834814	0.214058	-3.73313	0.000189118	0.00342737
ENSG00000182247.9,UBE2E2,protein_coding	311.541	0.805744	0.836053	0.215837	3.73311	0.000189132	0.00342737
ENSG00000105639.18,JAK3,protein_coding	301.15	-1.25433	-1.39129	0.336001	-3.73312	0.000189122	0.00342737
ENSG00000143341.11,HMCN1,protein_coding	279.77	-1.19567	-1.30747	0.320318	-3.73277	0.000189385	0.00342989
ENSG00000124406.16,ATP8A1,protein_coding	1098.05	1.31323	1.47358	0.351901	3.73181	0.000190112	0.00343891
ENSG00000136451.8,VEZF1,protein_coding	1714.13	0.525002	0.534041	0.140681	3.73186	0.000190072	0.00343891
ENSG00000162777.16,DENND2D,protein_coding	122.158	-1.17554	-1.286	0.315132	-3.7303	0.000191253	0.0034554
ENSG00000129657.14,SEC14L1,protein_coding	2689.76	-0.740914	-0.756112	0.198617	-3.73036	0.000191208	0.0034554
ENSG00000111859.16,NEDD9,protein_coding	1339.55	-0.972137	-1.02038	0.26066	-3.72952	0.000191847	0.00346405
ENSG00000081237.18,PTPRC,protein_coding	743.528	-1.03525	-1.10665	0.27774	-3.72741	0.000193457	0.00348923
ENSG00000175175.5,PPM1E,protein_coding	527.484	0.988595	1.0471	0.265246	3.72709	0.000193705	0.00348923
ENSG00000205930.8,C21orf62-AS1,lincRNA	83.4591	1.10026	1.18789	0.2952	3.72717	0.00019364	0.00348923
ENSG00000100055.20,CYTH4,protein_coding	368.171	-0.945744	-0.9998	0.25374	-3.72721	0.000193608	0.00348923
ENSG00000121361.3,KCNJ8,protein_coding	87.9259	-1.09913	-1.19062	0.294938	-3.72666	0.000194036	0.00349312
ENSG00000189152.10,GRAPL,protein_coding	64.2114	-1.30803	-1.46353	0.351087	-3.72564	0.000194819	0.00350512
ENSG00000164741.14,DLC1,protein_coding	1506.24	-1.08588	-1.1639	0.291508	-3.72505	0.000195277	0.00351125
ENSG00000182585.9,EPGN,protein_coding	6.17094	1.93578	2.66686	0.519819	3.72395	0.000196127	0.00352444
ENSG00000198517.9,MAFK,protein_coding	510.592	-0.879939	-0.92388	0.236314	-3.7236	0.000196399	0.00352512
ENSG00000204852.15,TCTN1,protein_coding	1171.29	-0.598432	-0.612169	0.16071	-3.72367	0.000196347	0.00352512
ENSG00000153774.8,CFDP1,protein_coding	408.463	0.832552	0.872704	0.223602	3.72337	0.000196579	0.00352624
ENSG00000143382.13,ADAMTSL4,protein_coding	160.807	-1.13283	-1.24033	0.304466	-3.72072	0.000198655	0.00355618
ENSG00000198821.10,CD247,protein_coding	16.302	-1.44233	-1.66961	0.387631	-3.72087	0.000198538	0.00355618
ENSG00000261842.1,RP11-143I21.1,lincRNA	3.04517	1.95085	3.24646	0.524333	3.72064	0.00019872	0.00355618
ENSG00000197933.12,ZNF823,protein_coding	118.38	0.738056	0.766195	0.198345	3.72108	0.000198375	0.00355618
ENSG00000248803.1,RP11-287J9.1,processed_pseudogene	4.30434	-2.07064	-3.80041	0.556692	-3.71954	0.000199588	0.00356784
ENSG00000106571.12,GLI3,protein_coding	842.799	-1.07488	-1.18287	0.288984	-3.71951	0.000199608	0.00356784
ENSG00000149294.16,NCAM1,protein_coding	7984.87	0.797763	0.828088	0.214592	3.71759	0.000201136	0.00359301
ENSG00000224189.6,HAGLR,antisense	117.433	1.48326	1.72611	0.399091	3.71658	0.000201934	0.00359561
ENSG00000225092.2,RP11-405O10.2,sense_intronic	64.035	-1.02085	-1.08785	0.274674	-3.71658	0.000201941	0.00359561
ENSG00000120549.16,KIAA1217,protein_coding	475.818	-0.95722	-1.01377	0.257559	-3.7165	0.000201998	0.00359561
ENSG00000205035.8,RP11-707M1.1,transcribed_unprocessed_pseudogene	4.50905	2.09405	4.7575	0.563367	3.71702	0.00020159	0.00359561
ENSG00000279427.1,RP11-132F7.2,TEC	12.6565	1.94078	2.87705	0.522174	3.71672	0.000201823	0.00359561
ENSG00000133466.13,C1QTNF6,protein_coding	430.653	-0.982226	-1.04614	0.264242	-3.71714	0.000201491	0.00359561
ENSG00000254415.3,SIGLEC14,protein_coding	81.5779	-1.17259	-1.28204	0.315524	-3.71631	0.00020215	0.0035962
ENSG00000023892.10,DEF6,protein_coding	109.377	-1.03464	-1.1053	0.278432	-3.71594	0.000202449	0.00359939
ENSG00000204287.13,HLA-DRA,protein_coding	2067.91	-1.30043	-1.45608	0.349997	-3.71554	0.000202767	0.00360079
ENSG00000176371.13,ZSCAN2,protein_coding	141.954	0.750591	0.774802	0.20201	3.71561	0.000202717	0.00360079
ENSG00000143252.14,SDHC,protein_coding	1730.78	0.685157	0.706056	0.184468	3.71423	0.000203826	0.00361543
ENSG00000198768.10,APCDD1L,protein_coding	34.7203	-2.03517	-3.66252	0.54794	-3.71422	0.000203832	0.00361543
ENSG00000000460.16,C1orf112,protein_coding	350.029	0.696983	0.717523	0.187668	3.71392	0.000204072	0.00361757
ENSG00000141098.12,GFOD2,protein_coding	653.789	0.583675	0.594582	0.157208	3.71276	0.00020501	0.00363206
ENSG00000143786.7,CNIH3,protein_coding	543.065	-1.56862	-1.88033	0.422538	-3.71237	0.00020533	0.003635
ENSG00000124831.18,LRRFIP1,protein_coding	1430.66	-0.632869	-0.647986	0.170488	-3.71211	0.000205538	0.003635
ENSG00000227110.6,LMCD1-AS1,antisense	190.923	0.990482	1.05389	0.266821	3.71216	0.000205499	0.003635
ENSG00000279591.1,AC002044.1,TEC	58.0727	-1.03411	-1.10408	0.278641	-3.71127	0.00020622	0.00364492
ENSG00000167543.15,TP53I13,protein_coding	248.266	-0.930593	-0.980433	0.250861	-3.7096	0.000207585	0.0036669
ENSG00000072832.14,CRMP1,protein_coding	1223.43	1.12079	1.20903	0.302209	3.70865	0.000208368	0.00367436
ENSG00000231460.2,RP11-321L2.1,lincRNA	1.02765	2.01878	6.14559	0.544331	3.70874	0.000208291	0.00367436
ENSG00000198040.10,ZNF84,protein_coding	2366.23	0.564078	0.573809	0.152098	3.70864	0.000208374	0.00367436
ENSG00000183248.11,PRR36,protein_coding	292.169	1.45148	1.66149	0.391608	3.70645	0.000210181	0.00370405
ENSG00000270171.1,RP11-338N10.1,lincRNA	15.2232	1.84288	2.47706	0.497301	3.70577	0.000210752	0.00370543
ENSG00000171608.15,PIK3CD,protein_coding	269.497	-0.856327	-0.895787	0.231061	-3.70607	0.000210499	0.00370543
ENSG00000245910.8,SNHG6,processed_transcript	253.88	0.683241	0.705945	0.184376	3.70569	0.000210813	0.00370543
ENSG00000172243.17,CLEC7A,protein_coding	404.679	-1.17001	-1.2793	0.31574	-3.70562	0.000210874	0.00370543
ENSG00000027075.13,PRKCH,protein_coding	223.165	-0.950403	-1.00437	0.256474	-3.70566	0.000210843	0.00370543
ENSG00000272734.1,ADIRF-AS1,processed_transcript	118.667	-1.26685	-1.43352	0.341902	-3.70529	0.000211149	0.00370809
ENSG00000066855.15,MTFR1,protein_coding	203.441	0.620139	0.635602	0.167374	3.70512	0.000211294	0.00370847
ENSG00000034152.18,MAP2K3,protein_coding	272.365	-0.938454	-0.98992	0.253301	-3.7049	0.000211472	0.00370944
ENSG00000188549.12,C15orf52,protein_coding	841.737	-0.98407	-1.04282	0.265633	-3.70463	0.000211702	0.00371131
ENSG00000184788.12,SATL1,protein_coding	12.3836	1.86526	2.56834	0.503564	3.70412	0.000212123	0.00371653
ENSG00000151229.12,SLC2A13,protein_coding	773.1	1.00345	1.07546	0.270957	3.70336	0.000212759	0.00372525
ENSG00000138964.16,PARVG,protein_coding	517.67	-1.15966	-1.26661	0.313148	-3.70323	0.000212868	0.00372525
ENSG00000130303.12,BST2,protein_coding	438.219	-1.48386	-1.65865	0.400725	-3.70294	0.000213112	0.00372736
ENSG00000162144.9,CYB561A3,protein_coding	427.31	-0.585787	-0.598333	0.15823	-3.70211	0.000213811	0.00373741
ENSG00000257704.3,INAFM1,protein_coding	117.309	-0.937289	-0.989927	0.253239	-3.7012	0.000214584	0.00374875
ENSG00000196150.13,ZNF250,protein_coding	531.116	0.758276	0.783103	0.204901	3.70068	0.000215019	0.00375417
ENSG00000168214.20,RBPJ,protein_coding	2136.92	0.625992	0.639739	0.169219	3.6993	0.000216194	0.0037725
ENSG00000179715.12,PCED1B,protein_coding	62.7614	-1.16841	-1.2789	0.315871	-3.699	0.000216454	0.00377485
ENSG00000196990.8,FAM163B,protein_coding	18.7098	1.90009	3.22835	0.51372	3.69868	0.000216719	0.00377729
ENSG00000187122.16,SLIT1,protein_coding	759.149	1.41554	1.6282	0.38279	3.69795	0.000217345	0.003786
ENSG00000232021.6,LEF1-AS1,processed_transcript	39.0324	-1.43759	-1.64588	0.388836	-3.69717	0.000218018	0.00379179
ENSG00000230649.2,AC024084.1,lincRNA	1.42752	-2.08359	-5.25572	0.56357	-3.69712	0.000218055	0.00379179
ENSG00000179776.17,CDH5,protein_coding	576.897	-1.39432	-1.55016	0.377125	-3.69724	0.000217955	0.00379179
ENSG00000160746.12,ANO10,protein_coding	395.123	0.556183	0.566944	0.150457	3.69663	0.000218478	0.00379695
ENSG00000120438.11,TCP1,protein_coding	1159.47	0.601774	0.616473	0.162856	3.69513	0.000219775	0.00381509
ENSG00000177575.12,CD163,protein_coding	2258.4	-1.42693	-1.64247	0.386159	-3.69518	0.000219732	0.00381509
ENSG00000123342.15,MMP19,protein_coding	213.907	-1.37676	-1.57801	0.372608	-3.69493	0.00021995	0.00381592
ENSG00000242540.2,AC010729.1,3prime_overlapping_ncrna	10.0533	1.7474	2.24987	0.472964	3.69456	0.000220265	0.00381919
ENSG00000075234.16,TTC38,protein_coding	257.284	-0.890852	-0.932909	0.241138	-3.69436	0.00022044	0.00382002
ENSG00000197121.14,PGAP1,protein_coding	3715.63	0.780732	0.809956	0.211426	3.6927	0.000221888	0.00383899
ENSG00000229589.1,ACVR2B-AS1,antisense	36.9169	1.13776	1.24408	0.30811	3.69271	0.000221874	0.00383899
ENSG00000161013.16,MGAT4B,protein_coding	757.734	-0.71581	-0.737226	0.193847	-3.69265	0.000221933	0.00383899
ENSG00000279829.1,RP11-63I8.1,TEC	37.6256	1.4343	1.63111	0.388434	3.69252	0.000222044	0.00383899
ENSG00000142677.3,IL22RA1,protein_coding	6.23205	-1.94516	-2.89679	0.526809	-3.69234	0.000222199	0.00383944
ENSG00000138435.14,CHRNA1,protein_coding	56.52	-1.96888	-3.19798	0.533255	-3.6922	0.000222325	0.00383944
ENSG00000123560.13,PLP1,protein_coding	7749.75	1.86085	2.65599	0.504016	3.69205	0.000222458	0.00383953
ENSG00000177666.15,PNPLA2,protein_coding	458.383	-0.785522	-0.815345	0.212789	-3.69156	0.000222881	0.00384464
ENSG00000070770.8,CSNK2A2,protein_coding	1382.13	0.477196	0.483204	0.129276	3.6913	0.000223115	0.00384647
ENSG00000020181.17,ADGRA2,protein_coding	446.474	-1.20675	-1.32825	0.327105	-3.68918	0.000224977	0.00387635
ENSG00000278909.1,RP11-401P9.7,TEC	202.52	1.35753	1.54216	0.368083	3.6881	0.000225934	0.00389061
ENSG00000104442.9,ARMC1,protein_coding	637.153	0.506559	0.514552	0.137365	3.68769	0.0002263	0.00389468
ENSG00000117090.14,SLAMF1,protein_coding	7.89857	-1.96338	-2.89265	0.532477	-3.68726	0.000226685	0.00389908
ENSG00000234323.5,RP11-308N19.1,lincRNA	6.83291	2.02135	3.24764	0.548251	3.6869	0.000226998	0.00390225
ENSG00000168795.4,ZBTB5,protein_coding	582.121	0.715966	0.737197	0.19427	3.68542	0.000228322	0.00392276
ENSG00000214652.5,ZNF727,protein_coding	51.3004	1.94019	2.78666	0.526554	3.6847	0.000228974	0.00393172
ENSG00000171596.6,NMUR1,protein_coding	6.34791	-1.56187	-1.9321	0.424033	-3.68337	0.000230167	0.00394996
ENSG00000128284.19,APOL3,protein_coding	134.667	-0.790989	-0.82325	0.214782	-3.68276	0.000230723	0.00395724
ENSG00000235560.3,AC002310.12,antisense	40.2426	1.28392	1.44149	0.348718	3.68184	0.000231561	0.00396935
ENSG00000130487.5,KLHDC7B,protein_coding	14.8377	-1.70483	-2.29913	0.463116	-3.68121	0.000232127	0.0039768
ENSG00000155980.11,KIF5A,protein_coding	2325.14	1.46367	1.67577	0.397694	3.68039	0.000232879	0.00398362
ENSG00000121742.15,GJB6,protein_coding	13.3428	2.02903	3.86994	0.55131	3.68038	0.000232887	0.00398362
ENSG00000276449.1,AC004076.5,antisense	178.437	1.13666	1.23618	0.308846	3.68034	0.000232922	0.00398362
ENSG00000279619.1,CTD-2527I21.5,TEC	27.6653	1.83272	2.33689	0.498061	3.67971	0.000233497	0.00399117
ENSG00000254376.2,SOX5P,processed_pseudogene	6.40346	1.97554	3.26028	0.536975	3.67902	0.000234131	0.00399748
ENSG00000267383.6,CTC-260E6.6,antisense	91.2731	1.18653	1.2944	0.322501	3.67913	0.000234027	0.00399748
ENSG00000174136.11,RGMB,protein_coding	1567.86	0.936399	0.985279	0.25456	3.6785	0.000234612	0.00400116
ENSG00000227117.6,HORMAD2-AS1,antisense	7.16793	-1.82786	-2.55901	0.496895	-3.67857	0.000234549	0.00400116
ENSG00000085871.8,MGST2,protein_coding	77.3431	-0.998377	-1.05637	0.271462	-3.67778	0.00023527	0.00401011
ENSG00000021355.12,SERPINB1,protein_coding	236.571	-1.09954	-1.1774	0.299008	-3.67729	0.000235727	0.00401473
ENSG00000221914.8,PPP2R2A,protein_coding	926.647	0.515398	0.524192	0.140161	3.6772	0.000235808	0.00401473
ENSG00000120088.14,CRHR1,protein_coding	28.5802	1.73018	2.20355	0.470569	3.67678	0.000236196	0.00401906
ENSG00000116783.14,TNNI3K,protein_coding	19.6759	1.55445	1.91441	0.422811	3.67646	0.000236494	0.0040214
ENSG00000100027.14,YPEL1,protein_coding	419.208	0.860997	0.89866	0.234199	3.67634	0.0002366	0.0040214
ENSG00000167220.11,HDHD2,protein_coding	889.171	0.516249	0.524942	0.140432	3.67615	0.000236777	0.00402214
ENSG00000186462.8,NAP1L2,protein_coding	79.2217	1.62029	1.9759	0.440775	3.676	0.000236917	0.00402225
ENSG00000261534.1,RP11-244O19.1,sense_overlapping	180.725	1.02374	1.09446	0.27855	3.67526	0.00023761	0.00403173
ENSG00000168938.5,PPIC,protein_coding	101.138	-1.1556	-1.25945	0.314452	-3.67498	0.000237873	0.00403392
ENSG00000121316.10,PLBD1,protein_coding	60.3806	-1.43147	-1.64462	0.38956	-3.67457	0.000238247	0.004038
ENSG00000130045.15,NXNL2,protein_coding	6.93513	-1.91652	-2.96504	0.521583	-3.67442	0.000238389	0.00403814
ENSG00000173020.10,ADRBK1,protein_coding	957.405	-0.648371	-0.665895	0.176466	-3.67419	0.000238603	0.00403948
ENSG00000133561.15,GIMAP6,protein_coding	180.851	-1.03998	-1.11037	0.283066	-3.67398	0.000238803	0.0040406
ENSG00000273230.1,RP11-1246C19.1,lincRNA	192.451	-0.823225	-0.866144	0.224112	-3.67328	0.000239456	0.00404506
ENSG00000267123.5,CTD-2357A8.3,lincRNA	1.77249	-2.04113	-3.77764	0.555672	-3.67327	0.00023947	0.00404506
ENSG00000076826.9,CAMSAP3,protein_coding	92.0345	1.70879	2.18353	0.465165	3.67351	0.000239238	0.00404506
ENSG00000147364.16,FBXO25,protein_coding	928.525	0.780665	0.812578	0.21256	3.67268	0.000240016	0.00405202
ENSG00000213846.5,AC098614.2,transcribed_processed_pseudogene	51.7508	-1.0983	-1.18644	0.299122	-3.67175	0.000240893	0.00406227
ENSG00000157514.16,TSC22D3,protein_coding	1014.39	-1.16799	-1.27635	0.31809	-3.67187	0.000240782	0.00406227
ENSG00000136866.13,ZFP37,protein_coding	329.2	0.857184	0.897293	0.233466	3.67155	0.000241081	0.00406316
ENSG00000243364.7,EFNA4,protein_coding	24.2951	-1.24584	-1.38225	0.33935	-3.67126	0.000241356	0.00406326
ENSG00000078142.11,PIK3C3,protein_coding	1952.19	0.475894	0.482514	0.129625	3.6713	0.000241317	0.00406326
ENSG00000204252.12,HLA-DOA,protein_coding	335.213	-1.33993	-1.51912	0.365029	-3.67075	0.00024184	0.00406912
ENSG00000184261.4,KCNK12,protein_coding	19.2182	1.70105	2.25301	0.463569	3.66947	0.00024305	0.0040872
ENSG00000168495.12,POLR3D,protein_coding	831.681	0.625605	0.640203	0.17053	3.6686	0.000243885	0.00409896
ENSG00000004838.13,ZMYND10,protein_coding	100.728	-1.37292	-1.56851	0.374321	-3.66775	0.000244693	0.00410939
ENSG00000091651.8,ORC6,protein_coding	226.104	0.952159	1.00403	0.259609	3.66766	0.000244779	0.00410939
ENSG00000189223.13,PAX8-AS1,processed_transcript	735.697	-1.8543	-2.90647	0.505641	-3.66722	0.000245203	0.00411422
ENSG00000226791.6,AC109826.1,lincRNA	15.2679	-1.40118	-1.59522	0.38216	-3.66648	0.000245911	0.0041238
ENSG00000261168.1,RP11-68I18.10,sense_overlapping	30.669	1.4614	1.70199	0.398642	3.66594	0.000246431	0.00412792
ENSG00000131831.17,RAI2,protein_coding	28.9892	1.40671	1.61177	0.383713	3.66605	0.000246329	0.00412792
ENSG00000251364.6,CTD-2516F10.2,antisense	89.2679	-1.13913	-1.2408	0.310829	-3.6648	0.000247534	0.00414229
ENSG00000260939.1,RP11-467J12.3,processed_pseudogene	3.2785	-1.95453	-3.05077	0.533329	-3.66477	0.000247563	0.00414229
ENSG00000121904.17,CSMD2,protein_coding	2070.5	0.931271	0.977388	0.254133	3.6645	0.000247824	0.00414323
ENSG00000196381.10,ZNF781,protein_coding	230.308	1.28777	1.44201	0.351426	3.66443	0.000247895	0.00414323
ENSG00000232093.1,RP11-307C12.11,antisense	7.0293	-1.64973	-2.02642	0.450284	-3.66376	0.000248542	0.00415012
ENSG00000185252.17,ZNF74,protein_coding	383.254	0.954782	1.00892	0.260605	3.66372	0.000248583	0.00415012
ENSG00000100167.19,SEPT3,protein_coding	1435.11	1.24636	1.37566	0.340232	3.66327	0.000249019	0.00415509
ENSG00000225472.1,RP11-120J1.1,antisense	92.8583	1.40946	1.61525	0.384787	3.66295	0.000249327	0.00415794
ENSG00000110077.14,MS4A6A,protein_coding	621.989	-1.33655	-1.51466	0.364978	-3.66201	0.000250243	0.00417017
ENSG00000139910.19,NOVA1,protein_coding	5323.69	1.05025	1.13567	0.286804	3.66191	0.000250337	0.00417017
ENSG00000124920.13,MYRF,protein_coding	996.219	1.73947	2.28728	0.475599	3.65743	0.000254758	0.00424146
ENSG00000105426.14,PTPRS,protein_coding	6204.06	0.843438	0.879498	0.230628	3.65713	0.000255058	0.0042441
ENSG00000130635.15,COL5A1,protein_coding	2706.94	-1.52511	-1.83059	0.417165	-3.6559	0.000256277	0.00426204
ENSG00000152291.13,TGOLN2,protein_coding	3804.78	-0.435238	-0.439992	0.119058	-3.65568	0.000256497	0.00426312
ENSG00000228451.3,SDAD1P1,transcribed_processed_pseudogene	87.0771	1.13941	1.2389	0.311706	3.65541	0.000256767	0.00426312
ENSG00000137821.11,LRRC49,protein_coding	572.324	0.692093	0.711893	0.189327	3.65554	0.000256645	0.00426312
ENSG00000068796.16,KIF2A,protein_coding	1227.89	0.593525	0.606942	0.162405	3.6546	0.000257579	0.00427425
ENSG00000111321.10,LTBR,protein_coding	247.826	-1.15029	-1.25389	0.314785	-3.65421	0.000257979	0.00427852
ENSG00000257443.1,RP11-150C16.1,antisense	3.22681	-2.0349	-7.11498	0.556928	-3.6538	0.000258385	0.00428291
ENSG00000198719.8,DLL1,protein_coding	286.921	1.40973	1.61341	0.38593	3.65281	0.000259387	0.0042959
ENSG00000256955.2,RP11-417L19.2,lincRNA	1.02736	2.04746	6.1648	0.560528	3.65274	0.000259454	0.0042959
ENSG00000111087.9,GLI1,protein_coding	129.155	-1.76989	-2.46733	0.484627	-3.65207	0.000260133	0.00430478
ENSG00000151849.14,CENPJ,protein_coding	597.336	0.930964	0.980751	0.254952	3.65153	0.000260682	0.00431149
ENSG00000100767.15,PAPLN,protein_coding	709.81	-1.31755	-1.48262	0.361012	-3.6496	0.000262653	0.00433932
ENSG00000169918.9,OTUD7A,protein_coding	279.262	1.20955	1.33859	0.331407	3.64973	0.000262514	0.00433932
ENSG00000280107.1,AL022393.9,TEC	38.2792	1.1297	1.23032	0.309562	3.64934	0.000262918	0.00434132
ENSG00000163734.4,CXCL3,protein_coding	50.6002	-1.64657	-2.14223	0.451293	-3.64857	0.000263703	0.00435189
ENSG00000121797.9,CCRL2,protein_coding	23.2653	-1.39755	-1.6102	0.383154	-3.64749	0.000264814	0.00436783
ENSG00000106211.8,HSPB1,protein_coding	829.076	-1.07322	-1.15691	0.294297	-3.64673	0.000265602	0.00437844
ENSG00000066557.5,LRRC40,protein_coding	353.082	0.627293	0.643789	0.172035	3.64631	0.000266029	0.00438307
ENSG00000099875.14,MKNK2,protein_coding	1008.79	-0.783107	-0.811706	0.214776	-3.64615	0.000266196	0.00438342
ENSG00000101266.16,CSNK2A1,protein_coding	1841.97	0.555204	0.566387	0.152328	3.6448	0.000267603	0.00440419
ENSG00000085831.15,TTC39A,protein_coding	94.9016	-1.36865	-1.57627	0.37559	-3.64401	0.000268423	0.00440804
ENSG00000270996.1,RP11-342K6.4,lincRNA	6.72203	1.68924	2.1835	0.463565	3.64402	0.000268415	0.00440804
ENSG00000138669.9,PRKG2,protein_coding	20.3501	1.93725	2.80611	0.531603	3.64417	0.000268255	0.00440804
ENSG00000073146.15,MOV10L1,protein_coding	23.0964	-1.27442	-1.41601	0.349724	-3.64407	0.00026836	0.00440804
ENSG00000140931.19,CMTM3,protein_coding	530.07	-0.644203	-0.660008	0.176807	-3.64354	0.00026891	0.00441364
ENSG00000068724.15,TTC7A,protein_coding	579.285	-0.655164	-0.672132	0.179834	-3.64317	0.000269299	0.00441761
ENSG00000163521.15,GLB1L,protein_coding	120.849	-0.857857	-0.900182	0.235502	-3.64268	0.000269816	0.00442357
ENSG00000111832.12,RWDD1,protein_coding	534.579	0.602804	0.61873	0.16549	3.64255	0.000269955	0.00442357
ENSG00000167186.10,COQ7,protein_coding	393.682	0.525074	0.533388	0.144165	3.64217	0.000270353	0.00442768
ENSG00000240891.6,PLCXD2,protein_coding	32.0993	1.48015	1.73308	0.406489	3.64131	0.000271255	0.00444003
ENSG00000122482.20,ZNF644,protein_coding	2157.18	0.433281	0.438478	0.119031	3.64007	0.000272563	0.00445902
ENSG00000182674.5,KCNB2,protein_coding	18.35	2.03323	3.82902	0.558822	3.63843	0.00027431	0.00448516
ENSG00000146904.8,EPHA1,protein_coding	6.41967	-1.87283	-2.61872	0.51496	-3.63686	0.000275987	0.00451013
ENSG00000104432.12,IL7,protein_coding	19.5343	-1.54717	-1.84585	0.425609	-3.6352	0.000277767	0.0045343
ENSG00000131620.17,ANO1,protein_coding	122.085	-1.55411	-1.86795	0.427514	-3.63524	0.000277726	0.0045343
ENSG00000196329.11,GIMAP5,protein_coding	149.733	-1.12671	-1.22582	0.310019	-3.63434	0.000278692	0.00454693
ENSG00000057019.15,DCBLD2,protein_coding	2487.5	-1.12488	-1.22228	0.309583	-3.63355	0.000279553	0.00455605
ENSG00000108798.8,ABI3,protein_coding	168.272	-1.18582	-1.30386	0.326344	-3.63367	0.00027942	0.00455605
ENSG00000163040.14,CCDC74A,protein_coding	85.7502	-1.17519	-1.30184	0.323478	-3.63299	0.000280161	0.00456349
ENSG00000148408.12,CACNA1B,protein_coding	105.725	1.86479	2.85965	0.513399	3.63224	0.000280973	0.00456929
ENSG00000260664.2,AC004158.3,lincRNA	529.282	1.10397	1.19716	0.303929	3.63234	0.00028086	0.00456929
ENSG00000266237.1,RP11-25D3.1,sense_intronic	4.31918	1.82876	2.61657	0.503454	3.63242	0.00028078	0.00456929
ENSG00000151650.7,VENTX,protein_coding	61.9446	-1.49475	-1.77042	0.411731	-3.63042	0.000282965	0.00459922
ENSG00000231512.5,LINC01347,lincRNA	3.16905	1.99538	3.65538	0.549695	3.62998	0.000283446	0.00460449
ENSG00000200708.1,RN7SKP93,misc_RNA	1.92373	-1.9967	-3.46924	0.550079	-3.62984	0.000283596	0.00460449
ENSG00000196782.12,MAML3,protein_coding	270.559	-0.832122	-0.869256	0.229279	-3.62929	0.000284197	0.00460928
ENSG00000196368.4,NUDT11,protein_coding	217.072	1.14505	1.26059	0.315492	3.62941	0.000284067	0.00460928
ENSG00000037280.15,FLT4,protein_coding	237.961	-1.20723	-1.3336	0.332688	-3.62872	0.000284828	0.0046136
ENSG00000235109.7,ZSCAN31,protein_coding	98.1301	0.943816	0.999579	0.260091	3.62878	0.00028476	0.0046136
ENSG00000125966.9,MMP24,protein_coding	150.377	1.51106	1.78467	0.416425	3.62864	0.000284923	0.0046136
ENSG00000272505.1,RP11-981G7.6,lincRNA	760.431	1.05895	1.13907	0.292194	3.62414	0.000289923	0.00469204
ENSG00000128872.9,TMOD2,protein_coding	3521.77	0.847698	0.887505	0.233922	3.62385	0.000290247	0.00469375
ENSG00000223799.1,IL10RB-AS1,antisense	4.70308	-1.64297	-2.03188	0.453388	-3.62377	0.00029034	0.00469375
ENSG00000165626.16,BEND7,protein_coding	287.615	1.01033	1.08101	0.278846	3.62325	0.000290919	0.00470059
ENSG00000025796.13,SEC63,protein_coding	1547.53	0.627446	0.645869	0.17321	3.62246	0.000291817	0.00470627
ENSG00000198176.12,TFDP1,protein_coding	703.145	-0.936972	-0.982518	0.258662	-3.62239	0.000291896	0.00470627
ENSG00000221946.7,FXYD7,protein_coding	85.271	1.9582	3.13026	0.540577	3.62242	0.000291859	0.00470627
ENSG00000131080.14,EDA2R,protein_coding	241.572	-1.32694	-1.50867	0.366277	-3.62278	0.000291452	0.00470627
ENSG00000162783.10,IER5,protein_coding	633.402	-0.817816	-0.84958	0.225804	-3.62179	0.000292568	0.00470955
ENSG00000272800.1,RP11-438L19.1,lincRNA	36.0021	1.3416	1.52228	0.370425	3.6218	0.000292564	0.00470955
ENSG00000253771.5,TPTE2P1,transcribed_unprocessed_pseudogene	8.52226	1.88091	2.8138	0.519309	3.62194	0.000292398	0.00470955
ENSG00000120278.14,PLEKHG1,protein_coding	1467.65	-1.06607	-1.13982	0.294372	-3.62151	0.000292884	0.00471211
ENSG00000198216.10,CACNA1E,protein_coding	552.566	1.45987	1.68073	0.403252	3.62025	0.000294322	0.00473272
ENSG00000275850.1,RP11-543P15.3,sense_intronic	47.1259	-1.31685	-1.49185	0.363791	-3.6198	0.000294831	0.00473837
ENSG00000137731.13,FXYD2,protein_coding	137.499	1.35254	1.56868	0.373704	3.61929	0.000295412	0.00474518
ENSG00000166747.12,AP1G1,protein_coding	2673.13	0.514698	0.52342	0.142223	3.61894	0.00029581	0.00474904
ENSG00000254087.7,LYN,protein_coding	427.758	-0.971369	-1.02719	0.268446	-3.61849	0.000296322	0.00475472
ENSG00000152944.8,MED21,protein_coding	401.227	0.992961	1.06371	0.274447	3.61804	0.000296839	0.00476049
ENSG00000164746.13,C7orf57,protein_coding	39.6218	-1.73836	-2.24118	0.480686	-3.61641	0.00029872	0.00478811
ENSG00000172780.16,RAB43,protein_coding	224.125	-1.21144	-1.3437	0.335007	-3.61616	0.000299005	0.00479012
ENSG00000178607.15,ERN1,protein_coding	377.663	-0.652849	-0.668911	0.180557	-3.61575	0.00029948	0.00479518
ENSG00000116001.15,TIA1,protein_coding	2089.37	0.709	0.731113	0.196095	3.6156	0.000299649	0.00479534
ENSG00000101000.5,PROCR,protein_coding	41.7114	-1.31991	-1.49106	0.365147	-3.61472	0.000300669	0.0048091
ENSG00000169896.16,ITGAM,protein_coding	256.455	-1.00625	-1.0713	0.278468	-3.61352	0.000302072	0.00482898
ENSG00000118495.18,PLAGL1,protein_coding	383.14	-1.36222	-1.55766	0.377025	-3.61306	0.000302603	0.00483491
ENSG00000273214.1,RP5-1039K5.18,lincRNA	12.0298	1.85858	2.71389	0.514795	3.61033	0.000305808	0.00488352
ENSG00000180488.14,FAM73A,protein_coding	881.947	0.506186	0.515618	0.140276	3.60849	0.000307985	0.00491568
ENSG00000196664.4,TLR7,protein_coding	199.083	-1.17348	-1.2849	0.325281	-3.60759	0.000309049	0.00493005
ENSG00000229852.2,RP11-398K22.12,antisense	327.187	0.996849	1.06206	0.276381	3.60679	0.000310013	0.00493842
ENSG00000129667.12,RHBDF2,protein_coding	532.979	-1.02379	-1.09419	0.283834	-3.60699	0.000309775	0.00493842
ENSG00000267500.1,ZNF887P,transcribed_unprocessed_pseudogene	59.2869	1.33546	1.53184	0.370267	3.60674	0.000310066	0.00493842
ENSG00000231925.11,TAPBP,protein_coding	2144.33	-0.699078	-0.719985	0.193857	-3.60616	0.000310757	0.00494117
ENSG00000112218.8,GPR63,protein_coding	112.654	1.33252	1.48683	0.369494	3.60635	0.000310536	0.00494117
ENSG00000091664.7,SLC17A6,protein_coding	43.6799	1.99538	3.34436	0.553342	3.60605	0.000310895	0.00494117
ENSG00000105122.12,RASAL3,protein_coding	103.405	-1.00088	-1.07008	0.277537	-3.6063	0.000310593	0.00494117
ENSG00000162065.11,TBC1D24,protein_coding	809.357	0.443657	0.448865	0.123045	3.60565	0.000311368	0.00494609
ENSG00000148935.10,GAS2,protein_coding	32.9345	1.73558	2.27714	0.481422	3.60511	0.000312016	0.00495377
ENSG00000095203.14,EPB41L4B,protein_coding	172.581	1.61827	1.95233	0.448904	3.60494	0.000312228	0.00495451
ENSG00000186487.17,MYT1L,protein_coding	409.51	1.91184	2.84528	0.530479	3.60399	0.000313374	0.00495964
ENSG00000054219.10,LY75,protein_coding	207.577	-1.28026	-1.42662	0.355189	-3.60445	0.000312814	0.00495964
ENSG00000129474.15,AJUBA,protein_coding	251.567	-0.953934	-1.01219	0.264678	-3.60413	0.000313202	0.00495964
ENSG00000167716.18,WDR81,protein_coding	758.92	-0.624873	-0.640336	0.173373	-3.60422	0.00031309	0.00495964
ENSG00000182463.15,TSHZ2,protein_coding	747.993	-1.48023	-1.74814	0.41072	-3.604	0.000313354	0.00495964
ENSG00000111880.15,RNGTT,protein_coding	418.8	0.611329	0.628187	0.169647	3.60353	0.000313927	0.00496338
ENSG00000282572.2,RP11-482G13.1,processed_transcript	47.3669	-1.41982	-1.65509	0.39401	-3.60352	0.00031394	0.00496338
ENSG00000119408.16,NEK6,protein_coding	2007.71	-0.861549	-0.90149	0.239125	-3.60292	0.000314664	0.00497222
ENSG00000141401.11,IMPA2,protein_coding	63.989	-1.24511	-1.3971	0.345644	-3.60228	0.000315433	0.00498176
ENSG00000188994.12,ZNF292,protein_coding	3814.01	0.564618	0.575607	0.156789	3.60114	0.000316822	0.00500108
ENSG00000168453.14,HR,protein_coding	394.538	1.33406	1.52326	0.370517	3.60054	0.000317557	0.0050075
ENSG00000125820.5,NKX2-2,protein_coding	327.265	1.26012	1.39463	0.349981	3.60054	0.000317562	0.0050075
ENSG00000213809.8,KLRK1,protein_coding	76.1447	1.72619	2.14303	0.479467	3.60022	0.000317948	0.00501096
ENSG00000143033.17,MTF2,protein_coding	790.142	0.664067	0.682184	0.184466	3.59993	0.000318299	0.00501125
ENSG00000183813.6,CCR4,protein_coding	10.172	-1.70914	-2.19561	0.474757	-3.60003	0.000318183	0.00501125
ENSG00000104427.11,ZC2HC1A,protein_coding	442.508	0.890834	0.93509	0.247479	3.59964	0.000318661	0.00501434
ENSG00000255641.1,RP11-277P12.6,protein_coding	32.8632	1.93038	2.81682	0.53632	3.5993	0.00031908	0.0050183
ENSG00000124225.15,PMEPA1,protein_coding	1237.06	-1.02359	-1.09606	0.28441	-3.59899	0.000319452	0.00502152
ENSG00000187527.10,ATP13A5,protein_coding	96.6841	1.49821	1.79757	0.416303	3.59885	0.000319622	0.00502158
ENSG00000072657.8,TRHDE,protein_coding	31.325	1.92988	3.03706	0.536277	3.59867	0.000319845	0.00502247
ENSG00000122223.12,CD244,protein_coding	7.71123	-1.70977	-2.20724	0.475227	-3.59781	0.000320909	0.00503393
ENSG00000279685.2,MAPT-IT1,sense_intronic	193.65	1.34705	1.53431	0.374397	3.59792	0.000320776	0.00503393
ENSG00000165416.14,SUGT1,protein_coding	2880.8	0.721858	0.746889	0.200679	3.59709	0.000321802	0.00504324
ENSG00000245975.2,RP11-30K9.6,lincRNA	12.4085	1.18425	1.31921	0.329228	3.59706	0.000321837	0.00504324
ENSG00000248485.1,PCP4L1,protein_coding	29.3594	1.85232	2.64906	0.514995	3.59677	0.000322188	0.00504611
ENSG00000164088.17,PPM1M,protein_coding	218.421	-0.845481	-0.880809	0.235114	-3.59606	0.000323078	0.00505741
ENSG00000211689.7,TRGC1,TR_C_gene	4.34493	-1.85889	-2.70587	0.516963	-3.59578	0.000323416	0.00505876
ENSG00000104660.17,LEPROTL1,protein_coding	702.71	0.708743	0.734111	0.197108	3.59572	0.0003235	0.00505876
ENSG00000254470.2,AP5B1,protein_coding	460.347	-0.743871	-0.770688	0.206964	-3.5942	0.000325388	0.00508419
ENSG00000149926.13,FAM57B,protein_coding	100.182	1.16781	1.27163	0.324922	3.59414	0.000325464	0.00508419
ENSG00000065615.13,CYB5R4,protein_coding	527.663	0.752386	0.779467	0.20936	3.59375	0.000325952	0.00508918
ENSG00000126882.12,FAM78A,protein_coding	175.582	-0.970127	-1.03103	0.270001	-3.59305	0.000326827	0.0051002
ENSG00000040341.17,STAU2,protein_coding	932.829	0.572542	0.584812	0.159356	3.59284	0.000327094	0.00510172
ENSG00000184454.6,NCMAP,protein_coding	41.1274	-1.99365	-3.66338	0.554931	-3.59261	0.000327384	0.00510359
ENSG00000223324.1,RN7SKP273,misc_RNA	12.0521	-1.25152	-1.41041	0.348395	-3.59225	0.000327836	0.00510799
ENSG00000177697.17,CD151,protein_coding	904.822	-1.06683	-1.14456	0.297091	-3.59091	0.000329523	0.00513162
ENSG00000157110.15,RBPMS,protein_coding	382.03	-1.24118	-1.38082	0.345679	-3.59054	0.000329992	0.00513363
ENSG00000279970.1,RP11-299G20.5,TEC	40.7909	2.02324	4.07596	0.563489	3.59055	0.000329978	0.00513363
ENSG00000134602.15,STK26,protein_coding	17.1463	-1.32225	-1.49924	0.368337	-3.5898	0.000330936	0.00514565
ENSG00000105383.14,CD33,protein_coding	107.359	-1.0872	-1.17846	0.302963	-3.58855	0.000332517	0.00516757
ENSG00000116147.16,TNR,protein_coding	5697.8	1.75385	2.33111	0.488782	3.58821	0.000332961	0.0051718
ENSG00000215788.9,TNFRSF25,protein_coding	269.358	-0.918569	-0.972226	0.256019	-3.5879	0.000333353	0.00517522
ENSG00000260807.6,RP11-161M6.2,lincRNA	1548.39	1.34981	1.54312	0.376258	3.58747	0.000333901	0.00518105
ENSG00000133059.16,DSTYK,protein_coding	789.194	0.402227	0.407103	0.112154	3.58638	0.000335303	0.00519938
ENSG00000245552.6,RP11-712B9.2,antisense	71.3363	-0.902009	-0.951403	0.251516	-3.58628	0.000335427	0.00519938
ENSG00000013364.18,MVP,protein_coding	758.651	-0.952448	-1.00832	0.265598	-3.58605	0.000335719	0.00520122
ENSG00000071794.15,HLTF,protein_coding	1539.9	0.555128	0.566222	0.15484	3.58518	0.000336849	0.00521606
ENSG00000233264.2,AC006042.8,processed_pseudogene	153.222	1.23995	1.38036	0.345892	3.58478	0.000337361	0.0052213
ENSG00000127152.17,BCL11B,protein_coding	155.329	1.52213	1.84032	0.424637	3.58454	0.000337675	0.00522346
ENSG00000138771.14,SHROOM3,protein_coding	641.654	-1.34611	-1.53096	0.375552	-3.58436	0.000337907	0.00522438
ENSG00000165566.12,AMER2,protein_coding	2943.39	1.3916	1.62907	0.38828	3.58401	0.000338354	0.0052286
ENSG00000160932.10,LY6E,protein_coding	310.444	-1.23024	-1.33556	0.343381	-3.58273	0.000340026	0.00525174
ENSG00000156650.12,KAT6B,protein_coding	1213.83	0.625706	0.639885	0.17466	3.58242	0.00034042	0.00525513
ENSG00000015285.10,WAS,protein_coding	107.994	-0.968248	-1.03165	0.270381	-3.58105	0.000342214	0.00528012
ENSG00000261366.1,MANEA-AS1,antisense	76.8586	1.02226	1.09302	0.285488	3.58076	0.000342595	0.00528329
ENSG00000177707.10,PVRL3,protein_coding	790.026	-1.62707	-2.04562	0.454491	-3.57999	0.000343611	0.00529625
ENSG00000235505.7,RP11-693N9.2,transcribed_unprocessed_pseudogene	27.6881	-1.50061	-1.79474	0.41934	-3.57851	0.000345561	0.00532359
ENSG00000250490.1,FLJ33360,lincRNA	31.4542	1.35961	1.565	0.380034	3.5776	0.00034677	0.00533424
ENSG00000154188.9,ANGPT1,protein_coding	198.665	-1.59902	-1.99432	0.446956	-3.57758	0.000346784	0.00533424
ENSG00000270248.1,CTC-471J1.10,processed_pseudogene	6.47475	1.57298	2.01025	0.439661	3.57771	0.000346623	0.00533424
ENSG00000165185.14,KIAA1958,protein_coding	1884.64	0.819813	0.856692	0.229177	3.57721	0.000347279	0.00533912
ENSG00000062716.10,VMP1,protein_coding	11139.4	-1.15417	-1.26708	0.322729	-3.57627	0.000348525	0.00535556
ENSG00000162641.18,AKNAD1,protein_coding	82.3692	1.81141	2.55146	0.506644	3.57531	0.000349815	0.00536847
ENSG00000131378.13,RFTN1,protein_coding	675.165	-0.914516	-0.967984	0.255792	-3.57523	0.000349917	0.00536847
ENSG00000118513.18,MYB,protein_coding	36.6198	1.29328	1.43514	0.361745	3.57511	0.000350079	0.00536847
ENSG00000147117.7,ZNF157,protein_coding	33.4516	1.27007	1.42964	0.355218	3.57547	0.000349603	0.00536847
ENSG00000197558.11,SSPO,protein_coding	402.911	-1.24021	-1.38876	0.346931	-3.57481	0.000350484	0.00537195
ENSG00000214063.10,TSPAN4,protein_coding	195.616	-0.938245	-0.994755	0.262535	-3.57379	0.000351853	0.00538745
ENSG00000181409.11,AATK,protein_coding	657.169	1.54682	1.88568	0.432814	3.57388	0.000351736	0.00538745
ENSG00000137868.18,STRA6,protein_coding	79.0883	-1.68398	-2.16177	0.471224	-3.57362	0.000352073	0.00538808
ENSG00000161912.17,ADCY10P1,transcribed_unprocessed_pseudogene	132.895	1.049	1.13032	0.293579	3.57315	0.00035271	0.00539508
ENSG00000129810.14,SGOL1,protein_coding	183.984	1.05188	1.13708	0.294435	3.57253	0.000353546	0.00540513
ENSG00000043093.13,DCUN1D1,protein_coding	1131.05	0.591299	0.605543	0.165529	3.57217	0.000354029	0.00540977
ENSG00000272692.1,RP11-399K21.14,lincRNA	18.788	-1.41516	-1.64749	0.396359	-3.5704	0.000356442	0.00544388
ENSG00000184743.12,ATL3,protein_coding	2009.83	-0.672694	-0.689021	0.188425	-3.57009	0.000356853	0.00544739
ENSG00000169919.16,GUSB,protein_coding	657.05	-0.701865	-0.722995	0.19661	-3.56984	0.000357194	0.00544983
ENSG00000133789.14,SWAP70,protein_coding	962.546	-0.830455	-0.862865	0.232692	-3.56891	0.000358476	0.00546177
ENSG00000205744.9,DENND1C,protein_coding	66.8558	-1.10809	-1.20889	0.310489	-3.56887	0.00035852	0.00546177
ENSG00000147124.12,ZNF41,protein_coding	422.479	0.515686	0.523695	0.144486	3.56911	0.000358198	0.00546177
ENSG00000227094.1,RP11-565P22.2,antisense	10.0772	-1.97394	-3.17567	0.553156	-3.5685	0.000359033	0.00546681
ENSG00000257612.1,MIR4307HG,lincRNA	16.5496	1.80226	2.53952	0.505225	3.56725	0.000360745	0.00549011
ENSG00000160013.8,PTGIR,protein_coding	31.691	-1.38176	-1.59419	0.387384	-3.5669	0.000361224	0.00549461
ENSG00000165490.12,DDIAS,protein_coding	135.542	0.800532	0.838935	0.224454	3.56657	0.000361682	0.0054988
ENSG00000224397.5,LINC01272,lincRNA	15.9665	-1.69184	-2.17117	0.474424	-3.5661	0.000362335	0.00550596
ENSG00000218536.1,AP002530.2,processed_pseudogene	7.82389	1.8943	2.83199	0.531237	3.56584	0.000362697	0.00550867
ENSG00000245164.6,LINC00861,lincRNA	22.9738	-1.77954	-2.39049	0.499131	-3.56528	0.000363473	0.00551769
ENSG00000155085.15,AK9,protein_coding	233.626	0.962613	1.02091	0.270043	3.56467	0.000364318	0.00552745
ENSG00000161791.13,FMNL3,protein_coding	2865.95	-0.686091	-0.707218	0.192483	-3.56442	0.000364667	0.00552745
ENSG00000129911.8,KLF16,protein_coding	276.499	-0.837049	-0.877193	0.234832	-3.56446	0.000364609	0.00552745
ENSG00000187398.11,LUZP2,protein_coding	599.375	1.91461	3.18241	0.537216	3.56395	0.000365322	0.0055346
ENSG00000149781.12,FERMT3,protein_coding	173.094	-1.05009	-1.13086	0.294662	-3.56372	0.000365636	0.00553656
ENSG00000196581.10,AJAP1,protein_coding	198.418	1.6288	2.02065	0.457187	3.56265	0.000367124	0.00555351
ENSG00000173372.16,C1QA,protein_coding	575.322	-1.32663	-1.50835	0.372358	-3.56278	0.000366951	0.00555351
ENSG00000230805.6,AL132709.1,lincRNA	4.09004	-1.9541	-3.52812	0.548535	-3.5624	0.000367476	0.00555605
ENSG00000182923.16,CEP63,protein_coding	729.566	0.655846	0.673553	0.184153	3.56141	0.000368862	0.0055742
ENSG00000162522.10,KIAA1522,protein_coding	369.374	-0.990393	-1.06932	0.278101	-3.56127	0.000369064	0.00557446
ENSG00000274184.1,RP11-158H5.8,lincRNA	35.5966	1.2959	1.46355	0.363911	3.56104	0.000369383	0.00557647
ENSG00000155269.11,GPR78,protein_coding	19.8029	-1.6361	-2.05268	0.459586	-3.55993	0.000370951	0.00559697
ENSG00000279722.1,RP11-44F14.6,TEC	97.8024	0.945121	1.00312	0.265497	3.55982	0.000371112	0.00559697
ENSG00000114279.13,FGF12,protein_coding	547.67	1.49901	1.9407	0.421122	3.55956	0.000371478	0.00559968
[truncated: 58,556 more rows]

## Sheet: S1b
GBM DE genes Classical vs Mesenchymal
	baseMean	log2FoldChange	lfcMLE	lfcSE	stat	pvalue	padj
ENSG00000124191.17,TOX2,protein_coding	50.2517	2.30472	2.62957	0.38138	6.04311	1.51167e-09	4.04084e-05
ENSG00000019169.10,MARCO,protein_coding	29.5865	2.92505	4.23006	0.513974	5.69105	1.26263e-08	0.000168756
ENSG00000086062.12,B4GALT1,protein_coding	481.774	1.20687	1.26039	0.218747	5.51718	3.44474e-08	0.000306938
ENSG00000090382.6,LYZ,protein_coding	280.929	2.02106	2.29504	0.374083	5.40271	6.56422e-08	0.000383699
ENSG00000025708.13,TYMP,protein_coding	415.513	1.42819	1.51733	0.265134	5.38668	7.17704e-08	0.000383699
ENSG00000120057.4,SFRP5,protein_coding	17.1096	-2.98352	-6.34996	0.560536	-5.32261	1.02289e-07	0.000455715
ENSG00000011105.11,TSPAN9,protein_coding	456.207	1.47298	1.58708	0.279583	5.26848	1.37557e-07	0.00052529
ENSG00000136286.14,MYO1G,protein_coding	139.478	1.39921	1.48613	0.268297	5.21515	1.8367e-07	0.000613711
ENSG00000137338.5,PGBD1,protein_coding	316.118	-0.798019	-0.812942	0.154771	-5.15613	2.52111e-07	0.000748799
ENSG00000253958.1,CLDN23,protein_coding	17.2713	2.1297	2.51817	0.415694	5.12324	3.0033e-07	0.000779445
ENSG00000165646.11,SLC18A2,protein_coding	8.47603	2.81526	4.25453	0.550842	5.11083	3.20747e-07	0.000779445
ENSG00000110719.9,TCIRG1,protein_coding	519.347	1.33562	1.41874	0.262711	5.08398	3.69607e-07	0.000823331
ENSG00000120949.14,TNFRSF8,protein_coding	9.80077	2.57789	4.13437	0.516181	4.99415	5.9095e-07	0.00105828
ENSG00000144136.10,SLC20A1,protein_coding	1871.46	1.30956	1.38775	0.262268	4.99321	5.93849e-07	0.00105828
ENSG00000012779.10,ALOX5,protein_coding	234.109	1.42816	1.54131	0.285307	5.00569	5.56626e-07	0.00105828
ENSG00000198959.11,TGM2,protein_coding	441.915	1.53945	1.6771	0.31094	4.95096	7.38488e-07	0.00123378
ENSG00000140464.19,PML,protein_coding	1021.05	0.936743	0.965263	0.191352	4.89538	9.81136e-07	0.00154275
ENSG00000256664.1,RP11-611O2.3,processed_pseudogene	148.104	2.17885	2.73479	0.446393	4.88102	1.05541e-06	0.00156734
ENSG00000267249.1,RP11-973H7.3,sense_intronic	9.71282	-1.66258	-1.86839	0.344193	-4.83037	1.36278e-06	0.00191729
ENSG00000141655.15,TNFRSF11A,protein_coding	153.27	1.32323	1.41182	0.277028	4.77651	1.78363e-06	0.00238391
ENSG00000259660.2,DNM1P47,transcribed_unprocessed_pseudogene	66.1723	2.16706	2.68019	0.454826	4.7646	1.89231e-06	0.00239502
ENSG00000216490.3,IFI30,protein_coding	388.253	1.4643	1.59492	0.307862	4.75636	1.97114e-06	0.00239502
ENSG00000114270.15,COL7A1,protein_coding	1271.02	1.50309	1.61755	0.320376	4.69166	2.70996e-06	0.00241467
ENSG00000145014.17,TMEM44,protein_coding	220.812	1.33873	1.43321	0.283927	4.71507	2.41628e-06	0.00241467
ENSG00000105825.11,TFPI2,protein_coding	26.7507	2.39774	3.28955	0.509651	4.70468	2.54271e-06	0.00241467
ENSG00000070159.13,PTPN3,protein_coding	221.459	2.21543	2.80521	0.47218	4.69193	2.70642e-06	0.00241467
ENSG00000151062.14,CACNA2D4,protein_coding	65.8766	1.24672	1.31891	0.264652	4.71081	2.46735e-06	0.00241467
ENSG00000197249.12,SERPINA1,protein_coding	221.215	1.46477	1.61402	0.311927	4.69586	2.6549e-06	0.00241467
ENSG00000161509.13,GRIN2C,protein_coding	167.777	-2.18871	-2.95468	0.463352	-4.72365	2.31645e-06	0.00241467
ENSG00000015285.10,WAS,protein_coding	107.994	1.30039	1.3896	0.276846	4.69716	2.63808e-06	0.00241467
ENSG00000166025.17,AMOTL1,protein_coding	2182.94	0.965602	1.0018	0.207041	4.66382	3.10395e-06	0.0026765
ENSG00000122224.17,LY9,protein_coding	9.13438	2.04432	2.48103	0.443507	4.60943	4.0377e-06	0.00325894
ENSG00000198113.2,TOR4A,protein_coding	112.87	1.09398	1.14835	0.237617	4.60397	4.14515e-06	0.00325894
ENSG00000175489.9,LRRC25,protein_coding	78.0846	1.425	1.55153	0.309279	4.60749	4.07567e-06	0.00325894
ENSG00000115919.14,KYNU,protein_coding	134.769	1.38292	1.49375	0.301023	4.59406	4.34711e-06	0.00332007
ENSG00000076944.14,STXBP2,protein_coding	141.974	0.992346	1.03175	0.216774	4.5778	4.69892e-06	0.00348908
ENSG00000185215.8,TNFAIP2,protein_coding	1113.08	1.31125	1.40877	0.286928	4.56997	4.87805e-06	0.00352419
ENSG00000146242.8,TPBG,protein_coding	179.061	2.21272	2.86708	0.48495	4.56277	5.04837e-06	0.00355126
ENSG00000160691.18,SHC1,protein_coding	1557.64	1.25848	1.34877	0.276246	4.55565	5.22228e-06	0.00357941
ENSG00000132000.11,PODNL1,protein_coding	75.9885	2.13556	2.81061	0.470027	4.54349	5.53306e-06	0.00369761
ENSG00000213654.9,GPSM3,protein_coding	132.681	1.01297	1.05641	0.22362	4.52986	5.90219e-06	0.00384808
ENSG00000160862.12,AZGP1,protein_coding	212.46	2.276	3.00913	0.507115	4.48813	7.185e-06	0.00398496
ENSG00000131203.12,IDO1,protein_coding	20.3509	2.40152	3.90346	0.53495	4.48924	7.14773e-06	0.00398496
ENSG00000181085.14,MAPK15,protein_coding	46.9492	2.38215	3.39232	0.528746	4.50529	6.62834e-06	0.00398496
ENSG00000175482.8,POLD4,protein_coding	207.462	1.10128	1.16767	0.244392	4.5062	6.59982e-06	0.00398496
ENSG00000166225.8,FRS2,protein_coding	1353.08	-0.540269	-0.545877	0.120573	-4.48085	7.4346e-06	0.00398496
ENSG00000248905.8,FMN1,protein_coding	673.728	1.45054	1.5913	0.323487	4.48406	7.32375e-06	0.00398496
ENSG00000166825.13,ANPEP,protein_coding	184.567	1.80583	2.10192	0.400756	4.50605	6.60459e-06	0.00398496
ENSG00000140563.14,MCTP2,protein_coding	103.684	1.7609	2.01531	0.393033	4.4803	7.45381e-06	0.00398496
ENSG00000276030.1,CTD-2027I19.3,lincRNA	31.509	-1.49234	-1.67849	0.332606	-4.48682	7.22929e-06	0.00398496
ENSG00000139209.15,SLC38A4,protein_coding	10.7928	2.27667	3.52526	0.511716	4.44908	8.62389e-06	0.0045201
ENSG00000143554.13,SLC27A3,protein_coding	376.525	1.18662	1.26844	0.267012	4.44408	8.82691e-06	0.00453754
ENSG00000159189.11,C1QC,protein_coding	875.465	1.5813	1.7927	0.356611	4.43425	9.23955e-06	0.00458
ENSG00000164733.20,CTSB,protein_coding	6565.58	1.03552	1.08977	0.234358	4.41853	9.93752e-06	0.00458
ENSG00000175463.11,TBC1D10C,protein_coding	34.8128	1.39914	1.51746	0.316282	4.42372	9.70167e-06	0.00458
ENSG00000111252.10,SH2B3,protein_coding	1118.56	0.925551	0.962371	0.209139	4.42552	9.62088e-06	0.00458
ENSG00000103034.14,NDRG4,protein_coding	2167.56	-1.11555	-1.1833	0.252291	-4.42169	9.79338e-06	0.00458
ENSG00000154217.14,PITPNC1,protein_coding	1233.5	-0.934182	-0.968551	0.211098	-4.42536	9.62823e-06	0.00458
ENSG00000168405.14,CMAHP,unitary_pseudogene	112.697	1.49753	1.6807	0.339421	4.41201	1.02415e-05	0.00464008
ENSG00000145779.7,TNFAIP8,protein_coding	113.022	0.98796	1.02643	0.224231	4.406	1.05297e-05	0.00469115
ENSG00000196091.12,MYBPC1,protein_coding	117.638	-2.03065	-2.6236	0.461704	-4.39816	1.09175e-05	0.00478418
ENSG00000156097.12,GPR61,protein_coding	28.308	-2.17168	-3.04225	0.495232	-4.38517	1.15894e-05	0.00491739
ENSG00000197321.14,SVIL,protein_coding	578.589	1.52956	1.7057	0.348715	4.38627	1.15313e-05	0.00491739
ENSG00000169418.9,NPR1,protein_coding	87.6948	1.82664	2.24191	0.417667	4.37345	1.223e-05	0.00510814
ENSG00000182866.16,LCK,protein_coding	12.8148	2.19935	2.96112	0.504447	4.35992	1.30112e-05	0.00535079
ENSG00000089820.15,ARHGAP4,protein_coding	377.341	1.0756	1.13216	0.247297	4.34945	1.3648e-05	0.00552763
ENSG00000249485.1,RBBP4P1,processed_pseudogene	38.513	1.11587	1.1832	0.257712	4.32991	1.49169e-05	0.00595141
ENSG00000196460.12,RFX8,protein_coding	22.9609	2.12008	2.80624	0.490988	4.31799	1.57454e-05	0.00610269
ENSG00000128340.14,RAC2,protein_coding	79.5648	1.15841	1.23221	0.268282	4.31789	1.57527e-05	0.00610269
ENSG00000014257.15,ACPP,protein_coding	29.1157	1.64548	1.94038	0.381403	4.31429	1.60113e-05	0.00611427
ENSG00000101194.17,SLC17A9,protein_coding	82.3813	1.13101	1.20301	0.262694	4.30544	1.66656e-05	0.00627448
ENSG00000149418.10,ST14,protein_coding	114.654	1.49137	1.66809	0.347185	4.29561	1.74213e-05	0.0064679
ENSG00000085465.12,OVGP1,protein_coding	103.244	-1.05877	-1.12161	0.246873	-4.28873	1.79701e-05	0.00658026
ENSG00000072694.19,FCGR2B,protein_coding	208.892	1.6652	1.91998	0.388657	4.28449	1.83161e-05	0.00661632
ENSG00000130429.12,ARPC1B,protein_coding	403.874	1.28377	1.39507	0.300868	4.2669	1.98207e-05	0.00698672
ENSG00000100852.12,ARHGAP5,protein_coding	5138.87	-0.694508	-0.710395	0.162785	-4.26641	1.98642e-05	0.00698672
ENSG00000101160.13,CTSZ,protein_coding	734.384	1.36297	1.50001	0.319992	4.25938	2.04997e-05	0.00711659
ENSG00000018280.16,SLC11A1,protein_coding	1619.51	1.29208	1.41543	0.303896	4.25172	2.12139e-05	0.00727011
ENSG00000178201.4,VN1R1,protein_coding	250.388	-1.15388	-1.23737	0.271686	-4.2471	2.16551e-05	0.00732737
ENSG00000279778.1,RP11-60A14.1,TEC	15.5705	-1.89248	-2.45288	0.446087	-4.24239	2.21149e-05	0.00738943
ENSG00000010327.10,STAB1,protein_coding	3748.84	1.31732	1.43618	0.311052	4.23506	2.28489e-05	0.00754043
ENSG00000112759.16,SLC29A1,protein_coding	319.556	0.936656	0.982791	0.221967	4.2198	2.4452e-05	0.00797104
ENSG00000102034.16,ELF4,protein_coding	197.237	1.18604	1.27588	0.282375	4.20022	2.66655e-05	0.00858791
ENSG00000140009.18,ESR2,protein_coding	241.79	1.89733	2.36202	0.452377	4.19413	2.73926e-05	0.00871706
ENSG00000163599.14,CTLA4,protein_coding	8.90061	2.09301	2.82398	0.499667	4.18881	2.80417e-05	0.00881863
ENSG00000132749.10,MTL5,protein_coding	8.27257	1.8409	2.2525	0.440341	4.18063	2.90708e-05	0.00903596
ENSG00000127507.17,ADGRE2,protein_coding	329.209	1.1843	1.27427	0.283507	4.1773	2.94988e-05	0.0090636
ENSG00000139269.2,INHBE,protein_coding	54.5099	-2.312	-4.27371	0.55457	-4.16899	3.05952e-05	0.00929363
ENSG00000259974.2,LINC00261,lincRNA	7.72885	-2.30802	-5.98843	0.555205	-4.15705	3.22381e-05	0.00968264
ENSG00000057019.15,DCBLD2,protein_coding	2487.5	1.30894	1.4501	0.31574	4.1456	3.38919e-05	0.00974154
ENSG00000260314.2,MRC1,protein_coding	204.361	1.80682	2.20195	0.435807	4.14592	3.38455e-05	0.00974154
ENSG00000108950.11,FAM20A,protein_coding	237.065	1.48488	1.6594	0.357615	4.15217	3.29334e-05	0.00974154
ENSG00000171700.13,RGS19,protein_coding	141.486	0.798829	0.828685	0.192463	4.15056	3.31656e-05	0.00974154
ENSG00000164484.11,TMEM200A,protein_coding	44.2885	1.98125	2.57299	0.479417	4.13262	3.58655e-05	0.0101683
ENSG00000265728.1,RP11-883A18.3,lincRNA	3.84127	-2.12681	-3.22068	0.514856	-4.13088	3.61373e-05	0.0101683
ENSG00000247400.3,DNAJC3-AS1,lincRNA	105.258	-0.85195	-0.883233	0.20637	-4.12826	3.65515e-05	0.0101777
ENSG00000131042.13,LILRB2,protein_coding	69.5853	1.34209	1.47094	0.325604	4.12186	3.75833e-05	0.0103571
ENSG00000274253.4,RP11-566K19.6,sense_overlapping	11.9796	-2.14519	-3.30709	0.522133	-4.10851	3.98217e-05	0.010862
ENSG00000273403.1,RP11-329B9.3,lincRNA	19.9941	-1.60019	-1.86744	0.390258	-4.10033	4.12565e-05	0.0110678
ENSG00000112425.13,EPM2A,protein_coding	323.265	-0.920287	-0.957389	0.224488	-4.0995	4.14042e-05	0.0110678
ENSG00000163071.10,SPATA18,protein_coding	102.281	2.05989	2.82085	0.503877	4.08809	4.34947e-05	0.0112104
ENSG00000106789.12,CORO2A,protein_coding	39.53	1.36452	1.50556	0.333495	4.09159	4.28428e-05	0.0112104
ENSG00000121742.15,GJB6,protein_coding	13.3428	-2.25656	-4.72553	0.552367	-4.08527	4.40261e-05	0.0112104
ENSG00000141480.17,ARRB2,protein_coding	699.674	0.772309	0.794987	0.18905	4.08522	4.40346e-05	0.0112104
ENSG00000204577.11,LILRB3,protein_coding	58.779	1.58579	1.82736	0.387587	4.09145	4.2868e-05	0.0112104
ENSG00000164690.7,SHH,protein_coding	76.6089	2.29231	4.78974	0.562916	4.0722	4.65714e-05	0.0115355
ENSG00000100298.15,APOBEC3H,protein_coding	2.52388	2.15938	3.1288	0.530007	4.07425	4.61626e-05	0.0115355
ENSG00000155659.14,VSIG4,protein_coding	535.071	1.58711	1.90494	0.389759	4.07202	4.66062e-05	0.0115355
ENSG00000124813.20,RUNX2,protein_coding	315.529	1.3681	1.50843	0.336871	4.0612	4.88207e-05	0.0118639
ENSG00000197128.11,ZNF772,protein_coding	933.335	-0.784618	-0.807728	0.193186	-4.06147	4.87652e-05	0.0118639
ENSG00000259554.1,RP11-408J6.1,sense_intronic	6.77565	-2.02098	-2.99227	0.498133	-4.05711	4.96829e-05	0.0119646
ENSG00000173369.15,C1QB,protein_coding	1048	1.50934	1.73761	0.372408	4.05292	5.05821e-05	0.0120724
ENSG00000121381.3,TAS2R9,protein_coding	14.4424	-1.77051	-2.23852	0.438616	-4.03658	5.42349e-05	0.0128112
ENSG00000165566.12,AMER2,protein_coding	2943.39	-1.59176	-1.86693	0.394502	-4.03485	5.46362e-05	0.0128112
ENSG00000115884.10,SDC1,protein_coding	228.422	1.4848	1.69331	0.369059	4.02319	5.74151e-05	0.0132307
ENSG00000197050.10,ZNF420,protein_coding	258.847	-0.733386	-0.751712	0.182204	-4.02509	5.69538e-05	0.0132307
ENSG00000146250.6,PRSS35,protein_coding	103.177	-2.0315	-2.728	0.505773	-4.01662	5.90381e-05	0.0134683
ENSG00000139971.15,C14orf37,protein_coding	766.948	-0.933838	-0.97789	0.232589	-4.01497	5.94536e-05	0.0134683
ENSG00000135597.18,REPS1,protein_coding	1181.59	-0.661232	-0.674354	0.164891	-4.01011	6.06892e-05	0.013519
ENSG00000174721.9,FGFBP3,protein_coding	106.04	-1.33078	-1.47488	0.331781	-4.01103	6.04541e-05	0.013519
ENSG00000136167.13,LCP1,protein_coding	547.622	1.14255	1.23189	0.285333	4.00426	6.22116e-05	0.0137436
ENSG00000020633.18,RUNX3,protein_coding	84.458	1.00226	1.04927	0.250573	3.9999	6.33701e-05	0.0137732
ENSG00000168899.4,VAMP5,protein_coding	85.0372	1.0435	1.10576	0.260883	3.99987	6.33762e-05	0.0137732
ENSG00000151651.15,ADAM8,protein_coding	146.582	1.37973	1.54704	0.346625	3.98046	6.87834e-05	0.0148278
ENSG00000151322.18,NPAS3,protein_coding	1430.78	-0.848139	-0.887772	0.213303	-3.97623	7.00174e-05	0.0148543
ENSG00000051523.10,CYBA,protein_coding	275.982	1.13085	1.21787	0.284321	3.97735	6.96877e-05	0.0148543
ENSG00000153551.13,CMTM7,protein_coding	97.4399	1.18888	1.28024	0.299387	3.97106	7.15523e-05	0.0150604
ENSG00000000938.12,FGR,protein_coding	112.009	1.07946	1.15746	0.271993	3.96871	7.22614e-05	0.0150908
ENSG00000184922.13,FMNL1,protein_coding	320.435	1.06723	1.1381	0.269324	3.96263	7.41288e-05	0.0153608
ENSG00000143369.14,ECM1,protein_coding	171.006	1.00292	1.05765	0.253753	3.95236	7.73856e-05	0.0156132
ENSG00000103740.9,ACSBG1,protein_coding	639.772	-1.23159	-1.33402	0.311683	-3.95144	7.76833e-05	0.0156132
ENSG00000142347.16,MYO1F,protein_coding	467.378	1.07196	1.14514	0.271129	3.95369	7.69559e-05	0.0156132
ENSG00000183579.15,ZNRF3,protein_coding	607.044	-0.839084	-0.869751	0.212274	-3.95284	7.72294e-05	0.0156132
ENSG00000124491.15,F13A1,protein_coding	652.59	1.68202	2.04969	0.426383	3.94484	7.98518e-05	0.0157427
ENSG00000260997.1,RP4-647J21.1,sense_overlapping	15.6085	1.37216	1.52097	0.347607	3.94746	7.89851e-05	0.0157427
ENSG00000167613.15,LAIR1,protein_coding	480.892	1.06921	1.13936	0.271091	3.94412	8.00947e-05	0.0157427
ENSG00000223799.1,IL10RB-AS1,antisense	4.70308	1.82257	2.27087	0.462414	3.94142	8.10017e-05	0.0158048
ENSG00000205744.9,DENND1C,protein_coding	66.8558	1.24856	1.36073	0.31707	3.9378	8.22307e-05	0.0159283
ENSG00000204257.14,HLA-DMA,protein_coding	357.385	1.21633	1.32667	0.309111	3.93492	8.32241e-05	0.0159288
ENSG00000023892.10,DEF6,protein_coding	109.377	1.11804	1.21374	0.284298	3.93263	8.40207e-05	0.0159288
ENSG00000105639.18,JAK3,protein_coding	301.15	1.3465	1.49589	0.342334	3.93329	8.37896e-05	0.0159288
ENSG00000179954.14,SSC5D,protein_coding	150.133	1.35028	1.51831	0.34408	3.92431	8.69774e-05	0.0163732
ENSG00000158292.6,GPR153,protein_coding	215.149	1.35975	1.53216	0.347776	3.90983	9.23603e-05	0.016739
ENSG00000171502.14,COL24A1,protein_coding	106.675	1.75884	2.0906	0.450153	3.9072	9.33721e-05	0.016739
ENSG00000172575.11,RASGRP1,protein_coding	421.725	-1.35854	-1.51085	0.346862	-3.91666	8.97844e-05	0.016739
ENSG00000167208.14,SNX20,protein_coding	73.7247	1.30404	1.45134	0.333877	3.90576	9.39303e-05	0.016739
ENSG00000166770.10,ZNF667-AS1,lincRNA	379.675	-0.814007	-0.844026	0.208376	-3.90642	9.36723e-05	0.016739
ENSG00000100365.14,NCF4,protein_coding	73.0911	1.30118	1.43804	0.332399	3.9145	9.05902e-05	0.016739
ENSG00000130234.10,ACE2,protein_coding	6.47407	-1.70035	-2.10481	0.435196	-3.90709	9.34131e-05	0.016739
ENSG00000215580.10,BCORP1,transcribed_unprocessed_pseudogene	4.68624	2.04197	2.75741	0.522768	3.90608	9.3804e-05	0.016739
ENSG00000082397.16,EPB41L3,protein_coding	825.53	1.39802	1.58474	0.358275	3.90209	9.5365e-05	0.0168821
ENSG00000125089.16,SH3TC1,protein_coding	532.437	1.20563	1.32153	0.30915	3.89982	9.62629e-05	0.016888
ENSG00000109861.15,CTSC,protein_coding	679.009	1.0843	1.15518	0.278111	3.89882	9.66619e-05	0.016888
ENSG00000158714.10,SLAMF8,protein_coding	88.0535	1.43445	1.62714	0.368775	3.88977	0.000100339	0.0174166
ENSG00000134982.16,APC,protein_coding	6788.01	-0.690651	-0.709094	0.177863	-3.88305	0.000103154	0.0176757
ENSG00000102699.5,PARP4,protein_coding	1266.25	0.602978	0.616621	0.155223	3.88459	0.000102503	0.0176757
ENSG00000043462.11,LCP2,protein_coding	460.279	0.9064	0.951837	0.233992	3.87364	0.000107222	0.0178312
ENSG00000198502.5,HLA-DRB5,protein_coding	256.36	1.79617	2.29687	0.463918	3.87173	0.000108064	0.0178312
ENSG00000006534.15,ALDH3B1,protein_coding	172.355	0.957786	1.00701	0.247088	3.87629	0.000106061	0.0178312
ENSG00000279090.1,RP11-684N3.1,TEC	5.06433	-2.07614	-3.81331	0.536194	-3.872	0.000107947	0.0178312
ENSG00000177575.12,CD163,protein_coding	2258.4	1.52077	1.77426	0.392404	3.87554	0.00010639	0.0178312
ENSG00000133138.19,TBC1D8B,protein_coding	98.9464	1.11694	1.19652	0.288281	3.87448	0.000106853	0.0178312
ENSG00000118496.4,FBXO30,protein_coding	1144.58	-0.723556	-0.742313	0.18717	-3.86576	0.000110742	0.0180503
ENSG00000167779.7,IGFBP6,protein_coding	42.6232	1.65286	2.01125	0.427467	3.86663	0.000110348	0.0180503
ENSG00000166819.11,PLIN1,protein_coding	41.5743	-1.56475	-1.83797	0.404951	-3.86405	0.000111521	0.0180671
ENSG00000106236.3,NPTX2,protein_coding	755.411	1.95369	2.71392	0.505894	3.86186	0.000112526	0.01812
ENSG00000173372.16,C1QA,protein_coding	575.322	1.46053	1.68265	0.378674	3.85695	0.000114811	0.0182159
ENSG00000274423.1,RP11-544O24.2,unprocessed_pseudogene	6.50537	-1.92714	-2.95673	0.499938	-3.85475	0.000115847	0.0182159
ENSG00000066336.11,SPI1,protein_coding	234.545	1.00036	1.05977	0.259295	3.858	0.000114316	0.0182159
ENSG00000277511.1,CTD-2095E4.5,lincRNA	12.6329	-1.28859	-1.42775	0.334249	-3.85517	0.000115649	0.0182159
ENSG00000279135.1,RP11-261P13.5,TEC	46.9489	-1.44644	-1.69569	0.375608	-3.85092	0.000117673	0.0183439
ENSG00000100342.20,APOL1,protein_coding	233.284	1.39446	1.5743	0.36218	3.85017	0.000118034	0.0183439
ENSG00000179344.16,HLA-DQB1,protein_coding	613.451	1.57696	1.88022	0.409976	3.84648	0.000119826	0.0185148
ENSG00000276449.1,AC004076.5,antisense	178.437	-1.21066	-1.34234	0.314927	-3.84426	0.000120918	0.0185762
ENSG00000171608.15,PIK3CD,protein_coding	269.497	0.908263	0.951995	0.236352	3.84285	0.000121616	0.0185767
ENSG00000175189.3,INHBC,protein_coding	40.6908	-2.15793	-3.6406	0.56272	-3.83482	0.000125654	0.0189955
ENSG00000140832.9,MARVELD3,protein_coding	33.2047	-1.85094	-2.39904	0.482697	-3.83458	0.000125779	0.0189955
ENSG00000211751.8,TRBC1,TR_C_gene	6.22061	2.08228	3.23689	0.544178	3.82647	0.000129996	0.0194477
ENSG00000168404.12,MLKL,protein_coding	145.028	1.01169	1.07306	0.264422	3.82603	0.000130229	0.0194477
ENSG00000125454.11,SLC25A19,protein_coding	155.438	0.848287	0.885497	0.221796	3.82463	0.000130968	0.0194495
ENSG00000271605.5,MILR1,protein_coding	111.793	1.14241	1.24923	0.298877	3.82233	0.000132199	0.0195238
ENSG00000182752.9,PAPPA,protein_coding	183.775	1.66618	2.00001	0.436376	3.81823	0.000134414	0.019634
ENSG00000278291.1,RP11-172H24.4,antisense	189.36	-1.1906	-1.30887	0.311712	-3.81956	0.000133693	0.019634
ENSG00000155761.13,SPAG17,protein_coding	94.7681	1.97889	2.72067	0.518673	3.81529	0.000136025	0.0197613
ENSG00000126391.13,FRMD8,protein_coding	537.047	0.814557	0.847202	0.213701	3.81166	0.000138036	0.019945
ENSG00000171522.5,PTGER4,protein_coding	122.349	1.18667	1.28953	0.311595	3.80838	0.000139882	0.0201031
ENSG00000186017.14,ZNF566,protein_coding	714.581	-0.777874	-0.805644	0.204431	-3.80507	0.000141763	0.0202645
ENSG00000198400.11,NTRK1,protein_coding	16.6645	1.6664	2.13209	0.438443	3.80072	0.000144277	0.0202982
ENSG00000049656.13,CLPTM1L,protein_coding	836.305	1.09147	1.17595	0.287099	3.80171	0.000143699	0.0202982
ENSG00000177706.8,FAM20C,protein_coding	2294.86	1.0104	1.07637	0.265831	3.80093	0.000144152	0.0202982
ENSG00000229334.1,AC046143.3,antisense	4.58124	1.89378	2.78053	0.499279	3.79303	0.000148819	0.0208277
ENSG00000152154.10,TMEM178A,protein_coding	313.668	-1.10779	-1.19855	0.292479	-3.78759	0.000152118	0.0209432
ENSG00000168280.16,KIF5C,protein_coding	3188.63	-0.849289	-0.886855	0.224078	-3.79015	0.000150559	0.0209432
ENSG00000145832.12,SLC25A48,protein_coding	93.4025	-1.80713	-2.57864	0.477254	-3.78651	0.000152779	0.0209432
ENSG00000141968.7,VAV1,protein_coding	124.306	1.15957	1.27552	0.30606	3.78871	0.000151429	0.0209432
ENSG00000107984.9,DKK1,protein_coding	55.0865	2.1048	3.4926	0.556164	3.78449	0.000154026	0.0209514
ENSG00000236908.2,RP5-1063M23.2,lincRNA	19.9837	1.89381	2.50464	0.500495	3.78387	0.000154406	0.0209514
ENSG00000254004.6,ZNF260,protein_coding	1305.34	-0.623145	-0.636083	0.164753	-3.78229	0.00015539	0.0209785
ENSG00000197467.13,COL13A1,protein_coding	101.381	1.57516	1.86583	0.417065	3.77677	0.000158873	0.0211285
ENSG00000182141.9,ZNF708,protein_coding	2082.06	-0.783861	-0.811925	0.20743	-3.77892	0.000157511	0.0211285
ENSG00000175809.5,ZNF645,protein_coding	3.28713	-2.01462	-3.35087	0.533309	-3.77759	0.00015835	0.0211285
ENSG00000279810.1,RP3-495K2.4,TEC	6.53791	2.05924	3.61786	0.545659	3.77385	0.000160746	0.0212718
ENSG00000144847.12,IGSF11,protein_coding	956.15	-0.80559	-0.831481	0.21407	-3.76321	0.000167745	0.0218209
ENSG00000182230.11,FAM153B,protein_coding	29.6703	-2.02197	-3.32396	0.537389	-3.76259	0.000168161	0.0218209
ENSG00000229875.1,EIF1P1,processed_pseudogene	7.77244	-1.77615	-2.31701	0.471793	-3.76468	0.000166761	0.0218209
ENSG00000172840.6,PDP2,protein_coding	471.671	-0.638592	-0.6536	0.169606	-3.76516	0.000166443	0.0218209
ENSG00000164054.15,SHISA5,protein_coding	1351.6	0.748707	0.773759	0.199215	3.75829	0.000171079	0.021907
ENSG00000160883.10,HK3,protein_coding	87.414	1.30412	1.44287	0.347465	3.75324	0.000174561	0.021907
ENSG00000147443.12,DOK2,protein_coding	25.0611	1.66429	2.02029	0.443406	3.75343	0.000174433	0.021907
ENSG00000106948.16,AKNA,protein_coding	1041.35	0.910616	0.954433	0.242562	3.75416	0.000173924	0.021907
ENSG00000166527.7,CLEC4D,protein_coding	2.53324	1.8934	2.64414	0.50392	3.75734	0.000171726	0.021907
ENSG00000091164.12,TXNL1,protein_coding	1078.96	-0.51966	-0.526175	0.138437	-3.75378	0.000174188	0.021907
ENSG00000177989.13,ODF3B,protein_coding	96.2685	1.24953	1.35404	0.332342	3.75977	0.000170069	0.021907
ENSG00000225217.1,HSPA7,unprocessed_pseudogene	255.731	1.44258	1.64026	0.384751	3.7494	0.000177261	0.0221216
ENSG00000129465.15,RIPK3,protein_coding	36.6538	1.38133	1.58232	0.368507	3.74846	0.000177926	0.0221216
ENSG00000100055.20,CYTH4,protein_coding	368.171	0.971279	1.02726	0.259337	3.74524	0.000180223	0.0223035
ENSG00000187210.12,GCNT1,protein_coding	189.524	1.38001	1.54561	0.368684	3.74306	0.000181792	0.0223939
ENSG00000163563.7,MNDA,protein_coding	97.8285	1.3193	1.49333	0.353175	3.73555	0.000187307	0.0226736
ENSG00000104723.20,TUSC3,protein_coding	280.959	1.74208	2.21924	0.466147	3.73719	0.000186085	0.0226736
ENSG00000166482.11,MFAP4,protein_coding	218.129	1.23028	1.33109	0.329461	3.73421	0.000188304	0.0226736
ENSG00000101916.11,TLR8,protein_coding	42.9482	1.59787	1.91363	0.42764	3.73648	0.000186613	0.0226736
ENSG00000149970.14,CNKSR2,protein_coding	675.803	-0.896527	-0.931782	0.240019	-3.73524	0.000187538	0.0226736
ENSG00000169220.17,RGS14,protein_coding	46.2047	1.24188	1.38583	0.332709	3.73264	0.000189486	0.0226983
ENSG00000187773.8,FAM69C,protein_coding	306.54	-1.25779	-1.42451	0.337058	-3.73168	0.000190207	0.0226983
ENSG00000251215.1,GOLGA5P1,processed_pseudogene	11.5968	1.61461	2.01681	0.432897	3.72979	0.000191643	0.022768
ENSG00000156689.6,GLYATL2,protein_coding	10.9632	2.00081	3.14857	0.537023	3.72575	0.000194735	0.0229362
ENSG00000088827.12,SIGLEC1,protein_coding	441.476	1.39709	1.58553	0.374987	3.7257	0.000194774	0.0229362
ENSG00000143549.19,TPM3,protein_coding	2383.96	0.471437	0.478233	0.126656	3.72218	0.000197507	0.0229992
ENSG00000170458.13,CD14,protein_coding	517.192	1.32477	1.50389	0.356273	3.71842	0.000200471	0.0229992
ENSG00000181444.12,ZNF467,protein_coding	46.7865	1.15672	1.26872	0.310704	3.72289	0.000196959	0.0229992
ENSG00000106991.13,ENG,protein_coding	745.561	1.07672	1.16233	0.289552	3.71858	0.000200347	0.0229992
ENSG00000130592.13,LSP1,protein_coding	190.938	0.969104	1.01889	0.260467	3.72064	0.000198718	0.0229992
ENSG00000140718.18,FTO,protein_coding	1558.36	-0.486516	-0.4934	0.130816	-3.71908	0.000199951	0.0229992
ENSG00000173530.5,TNFRSF10D,protein_coding	128.836	1.18251	1.29602	0.318264	3.71551	0.000202794	0.0230137
ENSG00000137700.16,SLC37A4,protein_coding	337.079	0.69988	0.721564	0.188391	3.71503	0.000203181	0.0230137
ENSG00000129226.13,CD68,protein_coding	630.744	1.18073	1.29424	0.317723	3.71624	0.000202212	0.0230137
ENSG00000257743.8,MGAM2,protein_coding	55.462	-1.86386	-2.56357	0.502181	-3.71153	0.000206011	0.0231382
ENSG00000110446.9,SLC15A3,protein_coding	271.862	0.944028	0.999184	0.254295	3.71233	0.000205362	0.0231382
ENSG00000242512.8,LINC01206,lincRNA	181.721	-1.52508	-1.80602	0.411496	-3.70619	0.0002104	0.0235154
ENSG00000167895.14,TMC8,protein_coding	150.566	1.06047	1.13595	0.286203	3.70531	0.000211129	0.0235154
ENSG00000152409.8,JMY,protein_coding	1063.59	-0.649842	-0.665628	0.175504	-3.70271	0.000213305	0.0236591
ENSG00000137869.13,CYP19A1,protein_coding	31.5523	1.41683	1.63196	0.382799	3.70123	0.000214559	0.0236999
ENSG00000235128.1,AC013474.4,processed_pseudogene	11.0151	1.63727	2.02535	0.442952	3.69627	0.000218787	0.0240674
ENSG00000169181.12,GSG1L,protein_coding	141.462	-1.434	-1.68547	0.388347	-3.69257	0.000221996	0.0243204
ENSG00000149781.12,FERMT3,protein_coding	173.094	1.10937	1.21069	0.30068	3.68953	0.000224671	0.024513
ENSG00000061337.15,LZTS1,protein_coding	1335.16	1.35795	1.56179	0.368936	3.6807	0.00023259	0.0251961
ENSG00000180479.13,ZNF571,protein_coding	375.263	-0.858814	-0.900118	0.233344	-3.68046	0.000232818	0.0251961
ENSG00000099250.17,NRP1,protein_coding	2129.45	0.856808	0.89989	0.232993	3.6774	0.000235623	0.0252666
ENSG00000196954.12,CASP4,protein_coding	381.152	0.943895	1.00098	0.25682	3.67532	0.000237551	0.0252666
ENSG00000010610.9,CD4,protein_coding	454.65	1.20914	1.33882	0.328925	3.67605	0.000236874	0.0252666
ENSG00000102575.10,ACP5,protein_coding	35.0823	1.73764	2.16785	0.472876	3.67463	0.000238195	0.0252666
ENSG00000105122.12,RASAL3,protein_coding	103.405	1.04151	1.12109	0.283403	3.67502	0.000237833	0.0252666
ENSG00000197016.11,ZNF470,protein_coding	856.76	-0.657242	-0.672958	0.178909	-3.67361	0.000239152	0.0252678
ENSG00000119321.8,FKBP15,protein_coding	1324.62	0.46087	0.467046	0.125539	3.67112	0.000241488	0.0254142
ENSG00000154930.14,ACSS1,protein_coding	714.24	-0.926567	-0.976879	0.2529	-3.66377	0.000248526	0.0260524
ENSG00000104894.11,CD37,protein_coding	156.46	1.12301	1.2216	0.306791	3.66051	0.000251717	0.0262837
ENSG00000119125.16,GDA,protein_coding	84.5703	-1.8257	-2.49814	0.499328	-3.65631	0.000255875	0.0265094
ENSG00000176971.3,FIBIN,protein_coding	747.447	-1.19073	-1.30738	0.325652	-3.65643	0.000255747	0.0265094
ENSG00000279189.1,RP11-861E23.2,TEC	89.9373	-1.65496	-2.14843	0.452865	-3.65442	0.000257759	0.0265094
ENSG00000157782.9,CABP1,protein_coding	105.207	-1.61754	-2.07212	0.442706	-3.65376	0.000258423	0.0265094
ENSG00000141526.14,SLC16A3,protein_coding	980.939	1.07935	1.15976	0.29544	3.65335	0.000258836	0.0265094
ENSG00000171766.15,GATM,protein_coding	2425.79	-0.967617	-1.02295	0.265045	-3.65076	0.000261465	0.0265795
ENSG00000101336.12,HCK,protein_coding	162.015	1.15049	1.26947	0.315142	3.65072	0.000261509	0.0265795
ENSG00000081237.18,PTPRC,protein_coding	743.528	1.0334	1.1136	0.283599	3.64386	0.000268578	0.0271946
ENSG00000182600.9,C2orf82,protein_coding	204.613	-1.52086	-1.8744	0.417767	-3.64047	0.000272146	0.0274518
ENSG00000137731.13,FXYD2,protein_coding	137.499	-1.38165	-1.56236	0.379754	-3.63827	0.000274471	0.0275823
ENSG00000185101.12,ANO9,protein_coding	13.3076	1.50517	1.7333	0.414365	3.63247	0.000280718	0.0281044
ENSG00000134242.15,PTPN22,protein_coding	49.3473	1.05286	1.12739	0.290362	3.62601	0.000287832	0.0284729
ENSG00000168685.14,IL7R,protein_coding	128.143	1.42792	1.60684	0.393978	3.62435	0.000289685	0.0284729
ENSG00000196126.10,HLA-DRB1,protein_coding	847.529	1.28321	1.43671	0.35399	3.62497	0.00028899	0.0284729
ENSG00000156711.16,MAPK13,protein_coding	180.233	0.917001	0.963539	0.253119	3.62281	0.000291419	0.0284729
ENSG00000165983.14,PTER,protein_coding	44.3631	1.22826	1.38047	0.338622	3.62723	0.000286473	0.0284729
ENSG00000176170.13,SPHK1,protein_coding	102.003	1.23812	1.36366	0.341627	3.62419	0.000289874	0.0284729
ENSG00000130066.16,SAT1,protein_coding	3002.88	0.869823	0.919322	0.240122	3.62242	0.000291855	0.0284729
ENSG00000027869.11,SH2D2A,protein_coding	16.6202	1.5909	1.92837	0.439357	3.62097	0.000293497	0.028529
ENSG00000114166.7,KAT2B,protein_coding	1927.18	-0.634957	-0.647225	0.175461	-3.6188	0.000295971	0.0286223
ENSG00000149054.14,ZNF215,protein_coding	7.99759	1.53039	1.79379	0.422963	3.61825	0.000296598	0.0286223
ENSG00000225813.1,AC009299.4,processed_pseudogene	4.81128	2.02175	4.74106	0.559226	3.61527	0.000300035	0.0288498
ENSG00000083223.17,ZCCHC6,protein_coding	1039.84	0.507498	0.516845	0.140556	3.61065	0.000305433	0.0291591
ENSG00000154227.13,CERS3,protein_coding	12.5658	-1.69018	-2.25923	0.468028	-3.61128	0.00030469	0.0291591
ENSG00000100647.7,SUSD6,protein_coding	1491.98	0.652937	0.672218	0.180889	3.60959	0.000306676	0.0291735
ENSG00000144668.11,ITGA9,protein_coding	252.331	1.00293	1.07826	0.278019	3.60742	0.000309254	0.0293144
ENSG00000172061.8,LRRC15,protein_coding	48.8684	1.86127	2.29529	0.516427	3.60413	0.000313206	0.0295159
ENSG00000112599.8,GUCA1B,protein_coding	39.7671	-1.26639	-1.44356	0.351403	-3.60381	0.000313587	0.0295159
ENSG00000173200.12,PARP15,protein_coding	80.5892	1.1702	1.26911	0.324891	3.60181	0.000316004	0.0296389
ENSG00000064012.21,CASP8,protein_coding	177.828	0.925774	0.980285	0.257682	3.59269	0.000327279	0.0305891
ENSG00000238164.6,RP3-395M20.8,antisense	35.6458	1.0663	1.14409	0.297095	3.58908	0.000331851	0.0306945
ENSG00000180667.10,YOD1,protein_coding	695.471	-0.680086	-0.700838	0.189462	-3.58956	0.00033123	0.0306945
ENSG00000167191.11,GPRC5B,protein_coding	4380.04	-0.781963	-0.813675	0.217774	-3.59071	0.000329778	0.0306945
ENSG00000228784.7,LINC00954,lincRNA	17.1045	1.38542	1.52027	0.386117	3.58809	0.000333111	0.0307048
ENSG00000132970.12,WASF3,protein_coding	1058	-0.866127	-0.90319	0.241481	-3.58672	0.000334857	0.0307597
ENSG00000137462.6,TLR2,protein_coding	620.998	1.017	1.09335	0.28376	3.58403	0.000338333	0.0309725
ENSG00000134802.17,SLC43A3,protein_coding	526.867	1.01416	1.09408	0.283143	3.58179	0.000341244	0.0309787
ENSG00000165416.14,SUGT1,protein_coding	2880.8	-0.735635	-0.761299	0.20541	-3.58131	0.000341877	0.0309787
ENSG00000260593.1,RP11-432I5.2,antisense	3.16807	-2.01461	-4.05002	0.562507	-3.58148	0.000341649	0.0309787
ENSG00000109458.8,GAB1,protein_coding	2899.25	-0.629541	-0.645847	0.17597	-3.57755	0.000346835	0.0312593
ENSG00000153157.12,SYCP2L,protein_coding	46.1697	-1.38657	-1.6025	0.387709	-3.57631	0.000348482	0.0312593
ENSG00000278611.1,CTC-543D15.8,lincRNA	21.9161	-1.40721	-1.64645	0.393475	-3.57637	0.000348399	0.0312593
ENSG00000011600.11,TYROBP,protein_coding	200.984	1.13265	1.24942	0.316836	3.57488	0.000350393	0.0313256
ENSG00000075891.21,PAX2,protein_coding	8.02744	-2.00649	-3.3772	0.561764	-3.57177	0.000354576	0.031437
ENSG00000197808.11,ZNF461,protein_coding	265.459	-0.605737	-0.620621	0.169611	-3.57133	0.000355168	0.031437
ENSG00000196967.10,ZNF585A,protein_coding	636.554	-0.646412	-0.663816	0.180932	-3.57268	0.000353347	0.031437
ENSG00000107968.9,MAP3K8,protein_coding	184.967	1.21122	1.34516	0.339247	3.57034	0.000356524	0.0314529
ENSG00000028137.16,TNFRSF1B,protein_coding	422.298	1.10537	1.21014	0.309842	3.56755	0.000360339	0.0316336
ENSG00000115641.18,FHL2,protein_coding	164.978	1.3576	1.56415	0.380954	3.56369	0.000365673	0.0316336
ENSG00000146094.13,DOK3,protein_coding	252.368	0.800155	0.829771	0.22446	3.56481	0.000364123	0.0316336
ENSG00000213976.4,CTD-2561J22.2,unprocessed_pseudogene	101.223	-0.901095	-0.952856	0.252787	-3.56464	0.00036436	0.0316336
ENSG00000089050.14,RBBP9,protein_coding	582.861	-0.602587	-0.616434	0.169081	-3.5639	0.000365383	0.0316336
ENSG00000204103.3,MAFB,protein_coding	847.849	1.00787	1.07509	0.282599	3.56643	0.000361884	0.0316336
ENSG00000163823.3,CCR1,protein_coding	201.462	0.867047	0.915198	0.243632	3.55884	0.000372492	0.0317105
ENSG00000261121.1,RP11-496D24.2,lincRNA	9.24156	-1.7456	-2.49886	0.49037	-3.55976	0.000371188	0.0317105
ENSG00000108788.11,MLX,protein_coding	473.44	0.439413	0.445056	0.123457	3.55925	0.000371912	0.0317105
ENSG00000254415.3,SIGLEC14,protein_coding	81.5779	1.14444	1.29094	0.321441	3.56034	0.00037038	0.0317105
ENSG00000138964.16,PARVG,protein_coding	517.67	1.13708	1.24856	0.319308	3.56109	0.000369323	0.0317105
ENSG00000163932.13,PRKCD,protein_coding	161.334	0.764373	0.796605	0.214904	3.55682	0.000375377	0.0318546
ENSG00000072818.11,ACAP1,protein_coding	37.3422	1.32358	1.48474	0.37231	3.55503	0.000377933	0.03197
ENSG00000260455.1,NBAT1,lincRNA	28.4043	-1.52609	-1.9003	0.429423	-3.55383	0.000379671	0.0320157
ENSG00000061455.10,PRDM6,protein_coding	48.4026	-1.04709	-1.1305	0.294827	-3.55154	0.000382988	0.0321939
ENSG00000166840.13,GLYATL1,protein_coding	2.46173	1.99616	3.89266	0.5622	3.55062	0.000384327	0.0322052
ENSG00000188060.6,RAB42,protein_coding	74.1226	1.10767	1.21996	0.312064	3.54949	0.000385985	0.032243
ENSG00000244482.10,LILRA6,protein_coding	34.7468	1.62619	2.00939	0.458486	3.54688	0.000389826	0.0324624
ENSG00000196586.13,MYO6,protein_coding	2179.53	-0.703061	-0.723533	0.198321	-3.54506	0.000392522	0.0325854
ENSG00000261842.1,RP11-143I21.1,lincRNA	3.04517	-1.86396	-3.06456	0.52678	-3.5384	0.000402566	0.0333158
ENSG00000125637.15,PSD4,protein_coding	325.481	0.989965	1.06551	0.280163	3.53353	0.000410051	0.0334082
ENSG00000123600.18,METTL8,protein_coding	896.615	-0.51841	-0.527843	0.146698	-3.53386	0.000409536	0.0334082
ENSG00000160932.10,LY6E,protein_coding	310.444	1.23512	1.38699	0.349616	3.5328	0.000411182	0.0334082
ENSG00000132965.9,ALOX5AP,protein_coding	188.188	1.13927	1.28384	0.322449	3.53319	0.000410582	0.0334082
ENSG00000248830.1,ZNF807,unprocessed_pseudogene	5.85607	-1.48743	-1.77705	0.420879	-3.53411	0.000409158	0.0334082
ENSG00000102003.10,SYP,protein_coding	489.828	-1.11311	-1.22135	0.31479	-3.53604	0.000406179	0.0334082
ENSG00000112394.16,SLC16A10,protein_coding	271.085	1.10694	1.1985	0.313442	3.53155	0.000413133	0.0334651
ENSG00000138172.10,CALHM2,protein_coding	115.677	0.882405	0.936471	0.249969	3.53006	0.000415472	0.0335528
ENSG00000143851.15,PTPN7,protein_coding	82.6899	0.951423	1.00979	0.270153	3.52179	0.000428647	0.0344753
ENSG00000136950.13,ARPC5L,protein_coding	292.295	0.535838	0.546533	0.152172	3.52128	0.000429475	0.0344753
ENSG00000138031.14,ADCY3,protein_coding	650.641	0.745835	0.779193	0.211934	3.51919	0.000432865	0.0346434
ENSG00000182472.8,CAPN12,protein_coding	14.4469	1.63532	1.96677	0.464811	3.51825	0.000434408	0.0346632
ENSG00000245970.2,KB-1208A12.3,antisense	20.349	-1.54035	-1.98439	0.437951	-3.51717	0.000436174	0.0347005
ENSG00000225393.1,RP11-218L14.4,antisense	6.17329	1.75676	2.31311	0.499961	3.51379	0.000441762	0.0350407
ENSG00000145040.3,UCN2,protein_coding	37.3644	1.6247	2.13984	0.46315	3.50794	0.000451595	0.0356667
ENSG00000019582.14,CD74,protein_coding	6265.22	1.13371	1.24404	0.323368	3.50594	0.000454991	0.0356667
ENSG00000167005.13,NUDT21,protein_coding	2187.78	-0.55817	-0.569388	0.159197	-3.50617	0.00045461	0.0356667
ENSG00000074370.17,ATP2A3,protein_coding	65.681	1.16065	1.26555	0.331036	3.50612	0.00045469	0.0356667
ENSG00000173442.12,EHBP1L1,protein_coding	1426.47	0.996582	1.06709	0.284375	3.50447	0.000457523	0.0357604
ENSG00000112297.14,AIM1,protein_coding	406.848	1.33806	1.53141	0.381992	3.50285	0.000460312	0.0357708
ENSG00000100614.17,PPM1A,protein_coding	1724.46	-0.535699	-0.545149	0.152933	-3.50284	0.000460332	0.0357708
ENSG00000125804.13,FAM182A,processed_transcript	316.936	-1.32979	-1.5911	0.37981	-3.5012	0.000463166	0.0358866
ENSG00000008294.20,SPAG9,protein_coding	7129.31	-0.549837	-0.561877	0.157088	-3.50018	0.000464947	0.0359205
ENSG00000186908.14,ZDHHC17,protein_coding	1666.09	-0.532384	-0.542314	0.15225	-3.49677	0.000470929	0.0362778
ENSG00000111679.16,PTPN6,protein_coding	172.901	0.908052	0.969245	0.259835	3.49473	0.000474548	0.0364516
ENSG00000116668.12,SWT1,protein_coding	265.584	-0.510494	-0.518491	0.14646	-3.48555	0.00049112	0.0375089
ENSG00000214894.6,LINC00243,lincRNA	2.17097	1.94083	3.74008	0.556807	3.48565	0.000490951	0.0375089
ENSG00000243646.8,IL10RB,protein_coding	281.463	0.62815	0.647783	0.18031	3.48373	0.000494479	0.0376579
ENSG00000141506.13,PIK3R5,protein_coding	281.682	1.13333	1.25335	0.325446	3.48241	0.000496931	0.0377371
ENSG00000116774.11,OLFML3,protein_coding	399.338	0.989391	1.07327	0.284251	3.4807	0.000500109	0.0378259
ENSG00000174125.7,TLR1,protein_coding	355.54	0.885448	0.940336	0.254475	3.4795	0.000502345	0.0378259
ENSG00000104689.9,TNFRSF10A,protein_coding	29.9099	1.20585	1.36921	0.346541	3.47967	0.000502037	0.0378259
ENSG00000205578.5,POM121B,unprocessed_pseudogene	19.5293	1.39845	1.61574	0.402545	3.47401	0.000512735	0.0382968
ENSG00000171885.13,AQP4,protein_coding	15700.6	-1.20489	-1.33791	0.346703	-3.47527	0.000510338	0.0382968
ENSG00000160255.16,ITGB2,protein_coding	747.097	1.13773	1.27095	0.327504	3.47393	0.000512898	0.0382968
ENSG00000179195.15,ZNF664,protein_coding	3739.9	-0.44158	-0.448038	0.127181	-3.47207	0.000516463	0.0384557
ENSG00000229887.4,HNRNPA1P6,transcribed_unprocessed_pseudogene	6.99175	-1.31456	-1.50167	0.378884	-3.46956	0.000521313	0.0385489
ENSG00000174456.13,C12orf76,protein_coding	385.403	-0.478822	-0.487289	0.138022	-3.46918	0.000522042	0.0385489
ENSG00000161405.16,IKZF3,protein_coding	75.9773	1.41479	1.65385	0.407694	3.47023	0.00052002	0.0385489
ENSG00000011422.11,PLAUR,protein_coding	233.183	1.05661	1.14879	0.304879	3.46567	0.000528903	0.0389479
ENSG00000075884.12,ARHGAP15,protein_coding	116.152	0.992896	1.0713	0.286636	3.46396	0.000532279	0.0389818
ENSG00000131446.16,MGAT1,protein_coding	1099.17	0.564769	0.577617	0.163023	3.46434	0.000531531	0.0389818
ENSG00000244682.7,FCGR2C,polymorphic_pseudogene	523.515	1.28186	1.44581	0.370738	3.45759	0.000545031	0.0396486
ENSG00000259269.1,RP11-624L4.2,lincRNA	2.40609	1.92897	3.45466	0.557745	3.45851	0.000543168	0.0396486
ENSG00000137809.16,ITGA11,protein_coding	326.297	1.31647	1.50489	0.380792	3.45719	0.000545833	0.0396486
ENSG00000175899.14,A2M,protein_coding	7300.19	1.15255	1.27383	0.333813	3.45268	0.000555041	0.0400994
ENSG00000100739.10,BDKRB1,protein_coding	2.8587	1.83594	2.81337	0.531636	3.45337	0.000553628	0.0400994
ENSG00000233820.2,RP11-535M15.2,transcribed_processed_pseudogene	12.401	1.71252	2.36787	0.496394	3.44992	0.000560744	0.0401857
ENSG00000279091.1,RP11-461F11.2,TEC	4.1993	-1.79111	-2.60544	0.519149	-3.45008	0.000560416	0.0401857
ENSG00000101000.5,PROCR,protein_coding	41.7114	1.28098	1.46331	0.371177	3.45114	0.000558219	0.0401857
ENSG00000183853.17,KIRREL,protein_coding	1422.51	0.830577	0.875479	0.240974	3.44674	0.000567389	0.0405531
ENSG00000155066.15,PROM2,protein_coding	151.961	-1.02284	-1.1101	0.29703	-3.44357	0.000574077	0.0407047
ENSG00000180353.10,HCLS1,protein_coding	754.121	1.11731	1.23447	0.324384	3.4444	0.000572335	0.0407047
ENSG00000257103.8,LSM14A,protein_coding	1797.13	-0.452804	-0.458219	0.131489	-3.44367	0.000573881	0.0407047
ENSG00000181634.7,TNFSF15,protein_coding	29.6768	0.97828	1.03723	0.284155	3.44277	0.000575796	0.0407185
ENSG00000167851.13,CD300A,protein_coding	145.799	1.03017	1.11871	0.299433	3.44039	0.00058087	0.040969
ENSG00000232093.1,RP11-307C12.11,antisense	7.0293	1.5621	1.96089	0.454173	3.43945	0.000582908	0.0410045
ENSG00000258768.2,CTD-2292M16.8,lincRNA	81.3295	-0.908937	-0.96669	0.26453	-3.43604	0.00059028	0.0413057
ENSG00000161944.16,ASGR2,protein_coding	5.20368	1.74961	2.71555	0.509106	3.43664	0.000588972	0.0413057
ENSG00000137225.12,CAPN11,protein_coding	3.95837	1.88284	3.34162	0.548477	3.43285	0.000597273	0.0416859
ENSG00000004399.12,PLXND1,protein_coding	2479.9	0.925011	0.982722	0.269654	3.43036	0.000602775	0.0417807
ENSG00000264885.1,RP11-815I9.4,sense_intronic	132.155	-0.959851	-1.03648	0.27975	-3.43111	0.000601125	0.0417807
ENSG00000158296.13,SLC13A3,protein_coding	217.293	-1.25344	-1.43567	0.365423	-3.43012	0.000603321	0.0417807
ENSG00000102401.19,ARMCX3,protein_coding	1530.78	-0.524817	-0.5348	0.153069	-3.42863	0.000606645	0.0419024
ENSG00000275055.1,CTC-471J1.11,antisense	19.9576	-1.2078	-1.36703	0.352383	-3.42752	0.000609111	0.0419643
ENSG00000137752.22,CASP1,protein_coding	186.822	0.930205	1.00207	0.271527	3.42582	0.000612937	0.0421193
ENSG00000182575.7,NXPH3,protein_coding	205.083	-1.30547	-1.53652	0.381334	-3.42344	0.000618334	0.0423812
ENSG00000163520.13,FBLN2,protein_coding	149.419	1.66365	2.13417	0.487079	3.41556	0.0006365	0.0429924
ENSG00000163817.15,SLC6A20,protein_coding	33.1609	-1.83856	-2.49434	0.537819	-3.41855	0.000629565	0.0429924
ENSG00000260400.1,RP11-119F7.5,sense_overlapping	120.71	-0.84973	-0.898952	0.24879	-3.41545	0.000636763	0.0429924
ENSG00000100523.14,DDHD1,protein_coding	1858.74	-0.590823	-0.606851	0.1729	-3.41714	0.000632824	0.0429924
ENSG00000171827.10,ZNF570,protein_coding	516.116	-0.587666	-0.602527	0.172064	-3.41539	0.0006369	0.0429924
ENSG00000266916.5,ZNF793-AS1,antisense	22.9397	-1.26292	-1.4441	0.369483	-3.41806	0.000630682	0.0429924
ENSG00000157657.14,ZNF618,protein_coding	487.203	0.827475	0.868429	0.242425	3.41332	0.000641767	0.0430456
ENSG00000175294.5,CATSPER1,protein_coding	3.06274	1.68607	2.23568	0.494013	3.413	0.00064252	0.0430456
ENSG00000197619.13,ZNF615,protein_coding	386.83	-0.633873	-0.649665	0.1857	-3.41343	0.000641513	0.0430456
ENSG00000164483.16,SAMD3,protein_coding	7.50426	1.60665	2.12132	0.470953	3.41149	0.000646094	0.0430692
ENSG00000166888.10,STAT6,protein_coding	629.652	0.951844	1.02387	0.278998	3.41165	0.000645708	0.0430692
ENSG00000272129.1,RP11-250B2.6,lincRNA	120.511	-1.09621	-1.19119	0.321556	-3.40908	0.000651816	0.0431292
ENSG00000186106.11,ANKRD46,protein_coding	413.176	-0.696577	-0.725024	0.204371	-3.4084	0.000653448	0.0431292
ENSG00000135679.21,MDM2,protein_coding	5901.96	1.11063	1.2008	0.325715	3.40983	0.000650043	0.0431292
ENSG00000278917.1,RP11-15A1.4,TEC	94.932	-1.06524	-1.16584	0.312482	-3.40897	0.000652086	0.0431292
ENSG00000244292.1,OR9N1P,transcribed_unprocessed_pseudogene	12.4375	-1.63003	-2.15476	0.479157	-3.40187	0.000669276	0.0437418
ENSG00000158806.13,NPM2,protein_coding	30.7784	-1.56981	-2.10699	0.461347	-3.40266	0.000667332	0.0437418
ENSG00000262119.1,RP11-483C6.1,sense_intronic	1257.6	-1.18558	-1.32934	0.348443	-3.4025	0.000667712	0.0437418
ENSG00000189164.14,ZNF527,protein_coding	485.295	-0.629095	-0.646053	0.184857	-3.40314	0.000666163	0.0437418
ENSG00000231205.11,ZNF826P,transcribed_unprocessed_pseudogene	85.0228	1.56126	1.9838	0.459045	3.4011	0.000671148	0.0437572
ENSG00000153214.9,TMEM87B,protein_coding	581.354	0.596275	0.613295	0.175423	3.39906	0.000676168	0.0437788
ENSG00000177182.10,CLVS1,protein_coding	126.37	-1.69348	-2.34968	0.498328	-3.39831	0.00067803	0.0437788
ENSG00000066382.16,MPPED2,protein_coding	315.7	-1.1961	-1.34387	0.351962	-3.39838	0.000677871	0.0437788
ENSG00000090776.5,EFNB1,protein_coding	262.438	0.805954	0.850031	0.237049	3.39995	0.00067398	0.0437788
ENSG00000261839.1,RP1-265C24.8,lincRNA	67.547	-1.29033	-1.51581	0.379926	-3.39626	0.000683134	0.044002
ENSG00000153246.11,PLA2R1,protein_coding	340.893	1.5036	1.8093	0.443285	3.39195	0.000693973	0.0445119
ENSG00000129450.8,SIGLEC9,protein_coding	99.5101	1.10764	1.23415	0.326565	3.39179	0.00069438	0.0445119
ENSG00000151650.7,VENTX,protein_coding	61.9446	1.41525	1.68561	0.417644	3.38865	0.000702377	0.0448922
ENSG00000103404.14,USP31,protein_coding	1447.27	-0.508737	-0.520057	0.150214	-3.38675	0.000707255	0.0448922
ENSG00000186300.11,ZNF555,protein_coding	641.131	-0.771663	-0.805445	0.227833	-3.38697	0.000706697	0.0448922
ENSG00000105176.17,URI1,protein_coding	877.969	-0.493549	-0.500933	0.145724	-3.38689	0.000706905	0.0448922
ENSG00000261202.1,RP3-496C20.1,antisense	4.267	-1.79154	-2.96207	0.529073	-3.38619	0.000708709	0.0448922
ENSG00000135378.3,PRRG4,protein_coding	66.1372	1.38364	1.65366	0.408737	3.38516	0.000711372	0.0449543
ENSG00000225107.1,AC092484.1,lincRNA	3.59823	1.89974	4.45245	0.561887	3.381	0.000722216	0.0452562
ENSG00000248208.1,RP11-153M7.1,processed_pseudogene	14.8245	1.63175	2.12587	0.482388	3.38266	0.000717868	0.0452562
ENSG00000130368.5,MAS1,protein_coding	28.8984	-1.77216	-2.5444	0.524065	-3.38156	0.000720764	0.0452562
ENSG00000197841.14,ZNF181,protein_coding	634.544	-0.660024	-0.681678	0.195231	-3.38074	0.000722921	0.0452562
ENSG00000107099.15,DOCK8,protein_coding	772.038	0.863538	0.922022	0.255578	3.37876	0.000728132	0.0454759
ENSG00000160551.9,TAOK1,protein_coding	7923.71	-0.466601	-0.473317	0.138127	-3.37806	0.000729998	0.0454862
ENSG00000135723.13,FHOD1,protein_coding	279.423	0.845376	0.895817	0.250639	3.37288	0.000743876	0.0461359
ENSG00000261609.3,GAN,protein_coding	2354.04	-0.845645	-0.897327	0.250703	-3.3731	0.000743277	0.0461359
ENSG00000007314.11,SCN4A,protein_coding	33.6392	-1.80242	-2.71012	0.53465	-3.37121	0.000748386	0.0463081
ENSG00000176393.10,RNPEP,protein_coding	350.176	0.542544	0.555382	0.160989	3.37007	0.00075148	0.0463376
ENSG00000162711.16,NLRP3,protein_coding	150.436	1.08769	1.22405	0.323329	3.36404	0.000768118	0.0463376
ENSG00000134516.15,DOCK2,protein_coding	546.678	0.961638	1.04201	0.285704	3.36585	0.000763082	0.0463376
ENSG00000111817.16,DSE,protein_coding	991.04	0.640596	0.660906	0.190235	3.36738	0.000758853	0.0463376
ENSG00000136750.11,GAD2,protein_coding	46.2062	-1.82805	-3.17206	0.543501	-3.36348	0.000769664	0.0463376
ENSG00000123342.15,MMP19,protein_coding	213.907	1.27477	1.44809	0.378851	3.36483	0.000765901	0.0463376
ENSG00000131979.18,GCH1,protein_coding	66.7115	1.1425	1.27198	0.33962	3.36406	0.000768058	0.0463376
ENSG00000158955.10,WNT9B,protein_coding	8.18357	-1.67613	-2.30091	0.497459	-3.36939	0.000753346	0.0463376
ENSG00000141448.8,GATA6,protein_coding	16.4765	1.80101	2.57765	0.534738	3.36802	0.000757104	0.0463376
ENSG00000213096.9,ZNF254,protein_coding	1669.64	-0.720985	-0.748325	0.214252	-3.36512	0.000765097	0.0463376
ENSG00000269834.5,ZNF528-AS1,processed_transcript	452.801	-0.913121	-0.979913	0.271474	-3.36356	0.000769433	0.0463376
ENSG00000104972.15,LILRB1,protein_coding	160.293	0.96641	1.03352	0.28708	3.36635	0.000761703	0.0463376
ENSG00000120784.15,ZFP30,protein_coding	843.145	-0.626974	-0.644757	0.186462	-3.36247	0.00077248	0.0464026
ENSG00000169508.6,GPR183,protein_coding	106.982	1.34689	1.65712	0.400874	3.35989	0.00077974	0.0467337
ENSG00000272371.1,RP11-25O10.2,lincRNA	5.14915	-1.5916	-2.1278	0.474186	-3.35649	0.000789377	0.0470502
ENSG00000259969.1,RP11-999E24.3,sense_overlapping	77.6365	-1.26439	-1.46391	0.376735	-3.35617	0.000790302	0.0470502
ENSG00000141574.7,SECTM1,protein_coding	60.41	1.28804	1.52861	0.38377	3.35629	0.00078997	0.0470502
ENSG00000187796.13,CARD9,protein_coding	123.39	0.99258	1.07776	0.295947	3.35391	0.000796773	0.0473301
ENSG00000260948.1,RP11-552M11.8,sense_overlapping	214.058	-0.922556	-0.989097	0.275267	-3.3515	0.000803764	0.0475341
ENSG00000125810.9,CD93,protein_coding	1413.39	0.980068	1.05993	0.292382	3.35201	0.000802273	0.0475341
ENSG00000177628.15,GBA,protein_coding	465.119	0.791423	0.833452	0.236257	3.34984	0.000808579	0.0477133
ENSG00000109854.13,HTATIP2,protein_coding	93.2538	1.05351	1.14776	0.31474	3.34724	0.000816191	0.0479508
ENSG00000276851.1,RP5-875H18.9,lincRNA	3.50946	1.87955	4.57838	0.561441	3.34772	0.00081479	0.0479508
ENSG00000149328.14,GLB1L2,protein_coding	109.421	1.57604	2.13871	0.471182	3.34487	0.000823219	0.0482576
ENSG00000149380.11,P4HA3,protein_coding	15.2232	1.4549	1.75804	0.435191	3.34313	0.000828384	0.0484541
ENSG00000186687.15,LYRM7,protein_coding	768.678	-0.562416	-0.575721	0.168262	-3.34251	0.000830244	0.0484569
ENSG00000233355.6,CHRM3-AS2,antisense	2.14188	1.84025	3.04639	0.550841	3.3408	0.000835359	0.0486448
ENSG00000138101.18,DTNB,protein_coding	251.488	0.58391	0.599656	0.174877	3.33897	0.000840888	0.0486448
ENSG00000050730.15,TNIP3,protein_coding	2.64386	1.66765	2.18039	0.499354	3.33962	0.00083893	0.0486448
ENSG00000148396.18,SEC16A,protein_coding	2953.2	0.379848	0.383771	0.113776	3.33857	0.000842111	0.0486448
ENSG00000266288.1,CTD-3096M3.2,lincRNA	6.20989	1.77807	3.14945	0.532609	3.33842	0.000842563	0.0486448
ENSG00000148331.11,ASB6,protein_coding	563.043	0.597778	0.614414	0.179124	3.33723	0.000846167	0.048677
ENSG00000013725.14,CD6,protein_coding	23.5498	1.40937	1.5945	0.422355	3.33693	0.000847106	0.048677
ENSG00000111424.10,VDR,protein_coding	40.0016	1.28281	1.45483	0.384484	3.33644	0.000848584	0.048677
ENSG00000186517.13,ARHGAP30,protein_coding	257.056	0.965532	1.0382	0.289447	3.33578	0.000850613	0.0486889
ENSG00000131378.13,RFTN1,protein_coding	675.165	0.871223	0.933681	0.261361	3.3334	0.000857902	0.0488274
ENSG00000112343.10,TRIM38,protein_coding	710.099	0.931272	0.996483	0.279392	3.33321	0.000858511	0.0488274
ENSG00000172935.8,MRGPRF,protein_coding	56.0918	1.44533	1.85346	0.433574	3.33353	0.000857508	0.0488274
ENSG00000182450.12,KCNK4,protein_coding	11.0846	-1.59314	-2.08881	0.478144	-3.33192	0.000862498	0.048849
ENSG00000213145.9,CRIP1,protein_coding	58.6059	1.29551	1.5066	0.388821	3.3319	0.000862546	0.048849
ENSG00000173156.6,RHOD,protein_coding	17.6699	1.78104	2.80767	0.535219	3.32769	0.000875699	0.049489
ENSG00000134548.9,SPX,protein_coding	56.6863	-1.72571	-2.4653	0.518728	-3.32681	0.000878474	0.0495411
ENSG00000124762.13,CDKN1A,protein_coding	1177.72	1.03629	1.13691	0.311572	3.326	0.000881013	0.0495797
ENSG00000086570.12,FAT2,protein_coding	10.9557	1.67947	2.16421	0.505231	3.32416	0.000886847	0.0496988
ENSG00000196268.11,ZNF493,protein_coding	2037.9	-0.771862	-0.809984	0.232184	-3.32436	0.00088622	0.0496988
ENSG00000116584.17,ARHGEF2,protein_coding	2296.9	0.534109	0.546792	0.160794	3.32171	0.00089469	0.0498414
ENSG00000139910.19,NOVA1,protein_coding	5323.69	-0.972765	-1.04677	0.292764	-3.32269	0.000891547	0.0498414
ENSG00000108798.8,ABI3,protein_coding	168.272	1.10421	1.23573	0.332432	3.32161	0.000894985	0.0498414
ENSG00000257858.1,MTND1P24,unprocessed_pseudogene	4.1593	1.73454	2.75458	0.522524	3.31955	0.000901641	0.0501076
ENSG00000054967.12,RELT,protein_coding	512.535	0.601795	0.617941	0.181323	3.31892	0.00090367	0.0501162
ENSG00000172936.12,MYD88,protein_coding	439.528	0.496548	0.503922	0.149856	3.3135	0.000921351	0.0508062
ENSG00000176974.17,SHMT1,protein_coding	377.508	0.666432	0.689839	0.2011	3.31393	0.000919951	0.0508062
ENSG00000276768.1,RP5-1116H23.5,lincRNA	12.9826	-1.64572	-2.37565	0.496691	-3.31336	0.000921814	0.0508062
ENSG00000113555.5,PCDH12,protein_coding	192.236	1.00951	1.10162	0.304958	3.31031	0.000931917	0.0511521
ENSG00000278740.1,RP11-147L13.14,lincRNA	18.6567	-1.37917	-1.68926	0.416624	-3.31034	0.000931819	0.0511521
ENSG00000106993.11,CDC37L1,protein_coding	239.9	-0.582351	-0.598252	0.176153	-3.30595	0.000946565	0.0517678
ENSG00000058335.15,RASGRF1,protein_coding	164.093	-1.67289	-2.44415	0.506046	-3.30581	0.000947007	0.0517678
ENSG00000115107.19,STEAP3,protein_coding	1041.56	1.01408	1.11213	0.306953	3.3037	0.00095417	0.0519964
ENSG00000184106.8,TREML3P,transcribed_unprocessed_pseudogene	6.40151	1.69104	2.31822	0.511904	3.30344	0.00095508	0.0519964
ENSG00000136002.16,ARHGEF4,protein_coding	2903	-1.01613	-1.13864	0.307905	-3.30015	0.000966343	0.0521845
ENSG00000113387.11,SUB1,protein_coding	2493.83	-0.79373	-0.828669	0.240455	-3.30095	0.000963573	0.0521845
ENSG00000282572.2,RP11-482G13.1,processed_transcript	47.3669	1.31952	1.56547	0.399779	3.30064	0.000964659	0.0521845
ENSG00000147439.11,BIN3,protein_coding	376.969	0.568281	0.583048	0.172195	3.30022	0.000966078	0.0521845
ENSG00000115165.9,CYTIP,protein_coding	93.4552	1.12657	1.2485	0.341486	3.29904	0.000970175	0.0522608
ENSG00000224397.5,LINC01272,lincRNA	15.9665	1.57938	2.03816	0.478801	3.2986	0.000971666	0.0522608
ENSG00000197181.11,PIWIL2,protein_coding	105.714	-1.35751	-1.62	0.411666	-3.29759	0.000975169	0.0523439
ENSG00000117245.12,KIF17,protein_coding	31.6817	1.21619	1.40677	0.369469	3.29171	0.000995792	0.0525032
ENSG00000164002.11,EXO5,protein_coding	117.502	1.27604	1.47004	0.387249	3.29515	0.000983703	0.0525032
ENSG00000077585.13,GPR137B,protein_coding	739.026	-1.02137	-1.11243	0.310337	-3.29115	0.000997779	0.0525032
ENSG00000159650.8,UROC1,protein_coding	5.90607	-1.66043	-2.43594	0.504247	-3.29288	0.000991672	0.0525032
ENSG00000118503.14,TNFAIP3,protein_coding	562.323	0.969576	1.03745	0.294591	3.29126	0.000997398	0.0525032
ENSG00000129667.12,RHBDF2,protein_coding	532.979	0.953873	1.03599	0.289706	3.29255	0.000992833	0.0525032
ENSG00000130270.16,ATP8B3,protein_coding	37.5134	1.09777	1.21033	0.333255	3.29408	0.000987427	0.0525032
ENSG00000089335.20,ZNF302,protein_coding	1309.81	-0.444002	-0.449748	0.134856	-3.29241	0.000993321	0.0525032
ENSG00000268401.1,CTC-344H19.4,lincRNA	13.1958	-1.45754	-1.81414	0.442773	-3.29186	0.000995281	0.0525032
ENSG00000268182.5,SMIM17,protein_coding	28.0722	-1.22315	-1.41219	0.371295	-3.29427	0.000986788	0.0525032
ENSG00000159322.17,ADPGK,protein_coding	1238.8	0.503945	0.511916	0.153215	3.28915	0.00100492	0.0526717
ENSG00000140564.10,FURIN,protein_coding	683.728	0.700588	0.729205	0.212995	3.28922	0.00100464	0.0526717
ENSG00000272370.1,RP11-307L14.1,lincRNA	5.49521	-1.47011	-1.82657	0.447116	-3.28799	0.00100906	0.0527853
ENSG00000198286.9,CARD11,protein_coding	91.2346	1.04651	1.16858	0.318478	3.28597	0.00101631	0.052957
ENSG00000165309.13,ARMC3,protein_coding	56.7669	1.84906	3.76884	0.562701	3.28604	0.00101606	0.052957
ENSG00000120333.4,MRPS14,protein_coding	565.14	-0.540131	-0.550137	0.164619	-3.2811	0.00103402	0.05308
ENSG00000004838.13,ZMYND10,protein_coding	100.728	1.24972	1.39	0.380586	3.28368	0.00102461	0.05308
ENSG00000114541.14,FRMD4B,protein_coding	660.904	0.836867	0.893178	0.255112	3.28039	0.00103664	0.05308
ENSG00000152592.13,DMP1,protein_coding	4.90363	-1.75704	-2.80909	0.535294	-3.28238	0.00102935	0.05308
ENSG00000137078.8,SIT1,protein_coding	4.17576	1.60568	2.03816	0.489413	3.28084	0.00103499	0.05308
ENSG00000234814.7,SVILP1,transcribed_unprocessed_pseudogene	6.15613	1.72814	2.6055	0.526528	3.28214	0.00103022	0.05308
ENSG00000137726.16,FXYD6,protein_coding	2994.56	-0.927962	-0.988824	0.282758	-3.28183	0.00103137	0.05308
ENSG00000174600.13,CMKLR1,protein_coding	263.912	1.18165	1.33717	0.359961	3.28271	0.00102814	0.05308
ENSG00000272958.1,CMP21-97G8.2,lincRNA	3.56959	-1.66963	-2.67288	0.508404	-3.28407	0.0010232	0.05308
ENSG00000130054.4,FAM155B,protein_coding	33.0448	-1.3607	-1.67367	0.414862	-3.27988	0.00103853	0.05308
ENSG00000119514.6,GALNT12,protein_coding	43.9708	1.3362	1.57247	0.407501	3.27901	0.00104173	0.0531421
ENSG00000135077.8,HAVCR2,protein_coding	383.134	0.825137	0.880676	0.251715	3.27806	0.00104525	0.05322
ENSG00000050327.14,ARHGEF5,protein_coding	37.7704	1.52487	1.90002	0.465457	3.27607	0.00105263	0.0532931
ENSG00000070778.12,PTPN21,protein_coding	734.304	-0.390339	-0.395101	0.11914	-3.27631	0.00105171	0.0532931
ENSG00000172315.5,TP53RK,protein_coding	435.617	-0.523982	-0.535212	0.159943	-3.27606	0.00105266	0.0532931
ENSG00000162599.15,NFIA,protein_coding	7147.56	-0.8128	-0.858058	0.248194	-3.27486	0.00105715	0.0534192
ENSG00000168421.12,RHOH,protein_coding	26.8721	1.08446	1.19011	0.331483	3.27153	0.00106968	0.0534735
ENSG00000189212.12,DPY19L2P1,transcribed_unprocessed_pseudogene	307.765	1.27311	1.4788	0.388907	3.27355	0.00106206	0.0534735
ENSG00000137801.10,THBS1,protein_coding	1834.99	1.24347	1.41193	0.38005	3.27187	0.0010684	0.0534735
ENSG00000255987.1,TOMM20P2,processed_pseudogene	2.32481	1.82243	2.89198	0.557009	3.27181	0.00106861	0.0534735
ENSG00000198440.9,ZNF583,protein_coding	514.781	-0.721544	-0.749837	0.220538	-3.27175	0.00106884	0.0534735
ENSG00000100368.13,CSF2RB,protein_coding	128.223	1.05117	1.15094	0.321323	3.27138	0.00107023	0.0534735
ENSG00000161643.12,SIGLEC16,transcribed_unprocessed_pseudogene	10.4629	1.56817	2.23097	0.479453	3.27076	0.00107259	0.0534915
ENSG00000280407.2,RP13-516M14.8,TEC	19.9673	1.54286	1.90138	0.471835	3.26991	0.00107583	0.0535529
ENSG00000273763.1,RP11-420C9.1,processed_pseudogene	4.09562	-1.62471	-2.35574	0.496996	-3.26906	0.00107905	0.0535727
ENSG00000150977.10,RILPL2,protein_coding	171.692	0.728285	0.761439	0.222802	3.26875	0.00108023	0.0535727
ENSG00000253557.5,RP11-1080G15.1,lincRNA	5.01971	1.59702	2.07098	0.488843	3.26694	0.00108716	0.0536278
ENSG00000166111.9,SVOP,protein_coding	54.083	-1.60048	-2.29094	0.489831	-3.26742	0.00108533	0.0536278
ENSG00000274031.1,RP11-413H22.3,antisense	17.7394	-1.23081	-1.41621	0.376751	-3.26689	0.00108736	0.0536278
ENSG00000198739.10,LRRTM3,protein_coding	269.26	-1.21994	-1.38113	0.373681	-3.26467	0.00109592	0.0539502
ENSG00000156886.11,ITGAD,protein_coding	7.49052	1.82787	4.09744	0.560116	3.26338	0.00110092	0.0540967
ENSG00000235649.2,MXRA5Y,unprocessed_pseudogene	4.47317	1.83173	4.86548	0.561552	3.26191	0.00110666	0.0542791
ENSG00000082482.13,KCNK2,protein_coding	128.016	-1.39219	-1.72548	0.427339	-3.25782	0.00112272	0.0547655
ENSG00000118849.9,RARRES1,protein_coding	28.7061	1.50895	1.88498	0.463128	3.25817	0.00112134	0.0547655
ENSG00000196437.10,ZNF569,protein_coding	317.778	-0.502663	-0.511265	0.154253	-3.25868	0.00111931	0.0547655
ENSG00000136840.18,ST6GALNAC4,protein_coding	137.573	0.720134	0.751359	0.221088	3.25723	0.00112506	0.0547796
ENSG00000231063.1,AC006994.1,processed_pseudogene	6.90704	-1.55694	-2.09907	0.478122	-3.25636	0.00112852	0.0548481
ENSG00000102265.11,TIMP1,protein_coding	1242.48	1.27282	1.48956	0.391012	3.25521	0.00113309	0.0549703
ENSG00000168301.12,KCTD6,protein_coding	358.769	-0.625158	-0.642307	0.192097	-3.25438	0.00113639	0.0550307
ENSG00000163466.15,ARPC2,protein_coding	2249.97	0.407044	0.412279	0.12512	3.25322	0.00114106	0.0551569
ENSG00000176920.11,FUT2,protein_coding	2.59433	-1.82817	-4.20828	0.562277	-3.25136	0.00114854	0.0554179
ENSG00000154760.13,SLFN13,protein_coding	207.879	1.40374	1.64393	0.431937	3.24988	0.00115455	0.0556077
ENSG00000163814.7,CDCP1,protein_coding	186.186	1.18085	1.34101	0.363582	3.24782	0.00116292	0.0557099
ENSG00000147588.6,PMP2,protein_coding	11102.4	-1.11766	-1.2655	0.344052	-3.24852	0.00116006	0.0557099
ENSG00000132514.13,CLEC10A,protein_coding	7.73529	1.79901	3.18066	0.553906	3.24786	0.00116276	0.0557099
ENSG00000226777.7,KIAA0125,lincRNA	6.6114	1.76066	2.68468	0.542198	3.24726	0.00116522	0.0557201
ENSG00000227268.3,KLLN,protein_coding	20.609	1.2334	1.38291	0.380413	3.24227	0.0011858	0.056603
ENSG00000242173.8,ARHGDIG,protein_coding	54.3842	-1.39397	-1.71778	0.430251	-3.2399	0.00119573	0.0569751
ENSG00000025434.18,NR1H3,protein_coding	186.013	0.701582	0.72646	0.216592	3.23919	0.00119868	0.0570139
ENSG00000237945.7,LINC00649,antisense	56.7094	1.23471	1.34749	0.381239	3.23867	0.00120089	0.0570176
ENSG00000184584.12,TMEM173,protein_coding	182.602	0.882261	0.940499	0.27255	3.23706	0.00120766	0.0572376
ENSG00000117984.12,CTSD,protein_coding	2800.5	0.889379	0.950884	0.275114	3.23277	0.00122596	0.0577705
ENSG00000133800.8,LYVE1,protein_coding	111.176	1.55467	2.0733	0.480917	3.23272	0.00122619	0.0577705
ENSG00000247774.6,PCED1B-AS1,processed_transcript	64.9561	1.00946	1.10705	0.312314	3.23221	0.00122837	0.0577705
ENSG00000198015.12,MRPL42,protein_coding	2082.6	-0.560279	-0.574969	0.173367	-3.23175	0.00123036	0.0577705
ENSG00000108821.13,COL1A1,protein_coding	7543.21	1.55239	1.95209	0.480362	3.23171	0.0012305	0.0577705
ENSG00000124177.14,CHD6,protein_coding	2961.19	-0.468089	-0.475425	0.144856	-3.2314	0.00123187	0.0577705
ENSG00000214113.10,LYRM4,protein_coding	408.511	-0.518277	-0.529758	0.160462	-3.22991	0.00123829	0.0579697
ENSG00000152990.13,ADGRA3,protein_coding	1455.69	-0.659045	-0.68624	0.204225	-3.22705	0.00125074	0.0582466
ENSG00000215018.9,COL28A1,protein_coding	898.604	-1.57017	-1.94147	0.486457	-3.22776	0.00124765	0.0582466
ENSG00000235159.1,RP6-109B7.4,lincRNA	7.38199	-1.40567	-1.71385	0.435529	-3.22751	0.00124874	0.0582466
ENSG00000255292.6,AP002884.2,protein_coding	3.24866	-1.78863	-3.21413	0.554497	-3.22568	0.00125672	0.0583358
ENSG00000167202.11,TBC1D2B,protein_coding	997.632	0.585257	0.60123	0.181468	3.22512	0.0012592	0.0583358
ENSG00000102879.15,CORO1A,protein_coding	311.125	0.86911	0.932226	0.269465	3.22532	0.00125834	0.0583358
ENSG00000261888.1,AC144831.1,lincRNA	50.8952	1.19362	1.34621	0.370397	3.22254	0.0012706	0.0587619
ENSG00000108666.9,C17orf75,protein_coding	310.465	-0.480086	-0.488834	0.149017	-3.22169	0.00127437	0.0588347
ENSG00000241882.1,RP11-637O11.2,lincRNA	10.0465	-1.53062	-2.05423	0.47558	-3.21843	0.00128893	0.0590229
ENSG00000165025.14,SYK,protein_coding	377.321	0.925442	0.997435	0.287473	3.21923	0.00128535	0.0590229
ENSG00000177105.9,RHOG,protein_coding	261.117	0.695089	0.722866	0.215972	3.21843	0.00128894	0.0590229
ENSG00000280800.1,CH507-513H4.6,lincRNA	18737.6	1.77795	3.20315	0.552533	3.21782	0.0012917	0.0590229
ENSG00000280614.1,CH507-513H4.4,lincRNA	18737.6	1.77795	3.20315	0.552533	3.21782	0.0012917	0.0590229
ENSG00000281181.1,CH507-513H4.3,lincRNA	18737.6	1.77795	3.20315	0.552533	3.21782	0.0012917	0.0590229
ENSG00000241839.9,PLEKHO2,protein_coding	846.891	0.593016	0.608869	0.184405	3.21584	0.00130065	0.0592293
ENSG00000073670.13,ADAM11,protein_coding	136.075	-0.974604	-1.07531	0.303028	-3.21622	0.00129892	0.0592293
ENSG00000183773.15,AIFM3,protein_coding	71.522	-1.60915	-2.15654	0.500753	-3.21345	0.0013115	0.0596221
ENSG00000106125.14,FAM188B,protein_coding	326.473	0.783008	0.819133	0.24375	3.21234	0.0013166	0.0597521
ENSG00000250011.1,HMGB1P3,processed_pseudogene	6.10342	1.76748	3.13748	0.550436	3.21106	0.00132248	0.0599175
ENSG00000272405.1,RP11-284F21.10,antisense	133.856	1.22434	1.40953	0.381367	3.2104	0.00132551	0.0599529
ENSG00000131504.15,DIAPH1,protein_coding	1279.86	0.521131	0.532985	0.162517	3.20663	0.00134302	0.0606422
ENSG00000135636.13,DYSF,protein_coding	300.576	1.11652	1.2492	0.348588	3.20298	0.00136016	0.0611617
ENSG00000146904.8,EPHA1,protein_coding	6.41967	1.65605	2.28459	0.517076	3.20272	0.00136139	0.0611617
ENSG00000123338.12,NCKAP1L,protein_coding	782.211	0.915359	0.987473	0.285728	3.20361	0.00135718	0.0611617
ENSG00000180448.10,HMHA1,protein_coding	276.986	0.960905	1.04299	0.300267	3.20017	0.00137346	0.0616008
ENSG00000168487.17,BMP1,protein_coding	722.201	0.68471	0.710905	0.214032	3.1991	0.00137858	0.0617268
ENSG00000172058.15,SERF1A,protein_coding	108.268	-1.04068	-1.1492	0.325459	-3.19756	0.00138595	0.0617462
ENSG00000187688.14,TRPV2,protein_coding	81.1049	0.967265	1.04457	0.302495	3.19762	0.00138568	0.0617462
ENSG00000008283.15,CYB561,protein_coding	250.001	0.761116	0.799736	0.237962	3.19848	0.00138152	0.0617462
ENSG00000162739.13,SLAMF6,protein_coding	14.9691	1.59226	2.11591	0.498161	3.19628	0.00139213	0.0617497
ENSG00000213514.2,RP11-428P16.2,processed_pseudogene	3.4792	-1.59763	-2.37396	0.499942	-3.19563	0.00139526	0.0617497
ENSG00000110077.14,MS4A6A,protein_coding	621.989	1.18657	1.34871	0.371255	3.19612	0.00139291	0.0617497
ENSG00000123901.8,GPR83,protein_coding	12.4236	-1.44336	-1.81016	0.451621	-3.19595	0.0013937	0.0617497
ENSG00000116833.13,NR5A2,protein_coding	72.6636	1.08967	1.22055	0.341197	3.19368	0.00140473	0.0620389
ENSG00000029534.19,ANK1,protein_coding	156.17	1.21686	1.38722	0.381064	3.19333	0.00140644	0.0620389
ENSG00000005844.17,ITGAL,protein_coding	160.906	0.932935	1.00397	0.292233	3.19243	0.00141079	0.0620861
ENSG00000039068.18,CDH1,protein_coding	105.939	-1.51761	-2.02069	0.47542	-3.19216	0.00141216	0.0620861
ENSG00000103522.15,IL21R,protein_coding	65.0094	1.39789	1.73008	0.438016	3.19141	0.0014158	0.0621443
ENSG00000171680.20,PLEKHG5,protein_coding	527.256	0.772497	0.814064	0.2421	3.19082	0.00141868	0.0621684
ENSG00000180543.4,TSPYL5,protein_coding	169.161	1.26651	1.50874	0.397544	3.18584	0.00144334	0.0631454
ENSG00000231304.2,SGOL1-AS1,processed_transcript	19.8662	-1.0982	-1.23563	0.34485	-3.18457	0.00144969	0.0633197
ENSG00000266094.6,RASSF5,protein_coding	237.54	0.827028	0.879877	0.259838	3.18286	0.00145826	0.0635825
ENSG00000152291.13,TGOLN2,protein_coding	3804.78	0.388193	0.393088	0.122069	3.18012	0.00147215	0.0635825
ENSG00000173559.12,NABP1,protein_coding	1110.35	0.944485	1.00675	0.297016	3.17992	0.00147317	0.0635825
ENSG00000118507.15,AKAP7,protein_coding	265.261	-0.909493	-0.957406	0.285855	-3.18166	0.00146436	0.0635825
ENSG00000103966.9,EHD4,protein_coding	548.067	0.828769	0.880227	0.260474	3.18178	0.00146374	0.0635825
ENSG00000214344.4,OR4F13P,transcribed_unprocessed_pseudogene	2.47114	1.77516	4.70939	0.558183	3.18025	0.00147147	0.0635825
ENSG00000103037.11,SETD6,protein_coding	552.662	-0.613051	-0.634909	0.192759	-3.18039	0.00147075	0.0635825
ENSG00000234282.1,RP4-673D20.4,unprocessed_pseudogene	5.18057	-1.74871	-2.65477	0.549976	-3.17961	0.00147474	0.0635825
ENSG00000095319.14,NUP188,protein_coding	1308.04	0.42894	0.436627	0.134981	3.17779	0.00148403	0.0638802
ENSG00000170891.10,CYTL1,protein_coding	29.0535	1.35107	1.67399	0.425223	3.17732	0.00148644	0.0638811
ENSG00000143119.12,CD53,protein_coding	356.6	0.935893	1.01812	0.29515	3.17091	0.00151964	0.0641476
ENSG00000092969.11,TGFB2,protein_coding	1793.81	-1.0188	-1.13497	0.320865	-3.17516	0.00149754	0.0641476
ENSG00000271991.1,RP11-79O8.1,lincRNA	3.65355	-1.72855	-3.08277	0.544944	-3.17198	0.00151405	0.0641476
ENSG00000253200.1,RP11-582J16.5,antisense	120.767	0.56584	0.582147	0.178404	3.17168	0.00151559	0.0641476
ENSG00000156049.6,GNA14,protein_coding	69.8538	1.05728	1.16801	0.333089	3.17417	0.00150267	0.0641476
ENSG00000136830.11,FAM129B,protein_coding	1157.9	1.00364	1.1085	0.316145	3.17462	0.00150032	0.0641476
ENSG00000167355.7,AC104389.28,processed_transcript	5.89007	-1.44401	-1.83053	0.455444	-3.17056	0.00152144	0.0641476
ENSG00000254838.5,GVINP1,transcribed_unprocessed_pseudogene	129.883	1.14586	1.29569	0.361363	3.17093	0.00151952	0.0641476
ENSG00000165795.21,NDRG2,protein_coding	2243.29	-0.951924	-1.03451	0.299925	-3.17387	0.00150419	0.0641476
ENSG00000167207.11,NOD2,protein_coding	102.313	1.06458	1.19417	0.335711	3.17111	0.00151858	0.0641476
ENSG00000275888.1,RP13-516M14.10,antisense	3.99727	1.68072	2.77686	0.529962	3.17139	0.00151711	0.0641476
ENSG00000125648.14,SLC25A23,protein_coding	1122.85	-0.700676	-0.734554	0.220777	-3.17368	0.00150521	0.0641476
ENSG00000131437.15,KIF3A,protein_coding	1243.31	-0.487798	-0.497277	0.154044	-3.16661	0.00154226	0.0649232
ENSG00000169896.16,ITGAM,protein_coding	256.455	0.898819	0.971254	0.284203	3.1626	0.00156369	0.0656366
ENSG00000276231.4,PIK3R6,protein_coding	57.7592	1.19244	1.35901	0.377053	3.16252	0.00156412	0.0656366
ENSG00000197629.5,MPEG1,protein_coding	270.132	1.13431	1.26552	0.358804	3.16137	0.00157029	0.0657923
ENSG00000091106.18,NLRC4,protein_coding	39.9073	1.12646	1.27891	0.356489	3.15987	0.00157838	0.0658256
ENSG00000164823.9,OSGIN2,protein_coding	689.722	-0.855595	-0.908916	0.270744	-3.16016	0.00157684	0.0658256
ENSG00000260966.1,RP11-690D19.3,sense_overlapping	310.678	-0.830666	-0.879676	0.262881	-3.15986	0.00157847	0.0658256
ENSG00000163513.17,TGFBR2,protein_coding	1007.88	0.85788	0.918441	0.271549	3.15921	0.00158196	0.065868
ENSG00000057593.13,F7,protein_coding	3.44632	1.59957	2.41427	0.506431	3.15851	0.00158579	0.0659251
ENSG00000173611.17,SCAI,protein_coding	939.498	-0.641065	-0.663934	0.203	-3.15796	0.0015888	0.0659475
ENSG00000148680.15,HTR7,protein_coding	19.3975	1.34123	1.6231	0.425079	3.15524	0.00160366	0.0661627
ENSG00000139344.7,AMDHD1,protein_coding	8.24153	1.29751	1.5373	0.411227	3.15523	0.00160374	0.0661627
ENSG00000134278.14,SPIRE1,protein_coding	1645.8	-0.559444	-0.572786	0.177308	-3.1552	0.00160388	0.0661627
ENSG00000159216.18,RUNX1,protein_coding	1835.19	1.04924	1.17679	0.332492	3.1557	0.00160114	0.0661627
ENSG00000115353.10,TACR1,protein_coding	71.0676	1.65918	2.58273	0.526157	3.15339	0.00161384	0.0663197
ENSG00000168961.16,LGALS9,protein_coding	376.587	0.789878	0.834394	0.250504	3.15316	0.00161513	0.0663197
ENSG00000141425.17,RPRD1A,protein_coding	1625.5	-0.403111	-0.407688	0.127829	-3.15352	0.00161312	0.0663197
ENSG00000127084.17,FGD3,protein_coding	146.554	0.910813	0.975371	0.2889	3.1527	0.00161771	0.0663235
ENSG00000229326.3,AC069154.4,processed_pseudogene	3.77584	-1.63328	-2.56317	0.518261	-3.15145	0.00162459	0.0664022
ENSG00000148408.12,CACNA1B,protein_coding	105.725	-1.62965	-2.5057	0.517074	-3.15168	0.00162333	0.0664022
ENSG00000114013.15,CD86,protein_coding	148.803	0.912186	0.986123	0.289579	3.15004	0.00163249	0.0665213
ENSG00000256660.5,CLEC12B,protein_coding	2.30053	1.72205	3.10038	0.546656	3.15015	0.00163186	0.0665213
ENSG00000186868.15,MAPT,protein_coding	2509.03	-0.971497	-1.06503	0.308517	-3.14892	0.00163875	0.0666748
ENSG00000146215.13,CRIP3,protein_coding	69.8238	-1.04048	-1.16782	0.330477	-3.14843	0.00164152	0.0666863
ENSG00000154721.14,JAM2,protein_coding	1821.8	-0.717752	-0.748996	0.228053	-3.14731	0.00164779	0.0668394
ENSG00000198453.12,ZNF568,protein_coding	682.695	-0.545061	-0.559687	0.173253	-3.14605	0.00165492	0.0670267
ENSG00000213445.8,SIPA1,protein_coding	436.785	0.864423	0.928812	0.275	3.14336	0.0016702	0.0675434
ENSG00000182162.10,P2RY8,protein_coding	37.3953	1.27226	1.47251	0.404818	3.1428	0.00167342	0.0675712
ENSG00000225299.1,RP11-344A5.1,antisense	11.3283	-1.50955	-1.99523	0.480616	-3.14086	0.00168454	0.0677133
ENSG00000170430.9,MGMT,protein_coding	71.2592	1.17869	1.31921	0.37526	3.14099	0.00168378	0.0677133
ENSG00000255856.2,RP11-87C12.5,lincRNA	7.13392	-1.43467	-1.84591	0.456722	-3.14123	0.0016824	0.0677133
ENSG00000154451.14,GBP5,protein_coding	225.123	1.28078	1.50573	0.408358	3.13642	0.00171023	0.0678304
ENSG00000158716.8,DUSP23,protein_coding	44.2435	1.17626	1.34492	0.37464	3.1397	0.00169123	0.0678304
ENSG00000158691.14,ZSCAN12,protein_coding	400.585	-0.468475	-0.476984	0.149282	-3.13819	0.00169992	0.0678304
ENSG00000198851.9,CD3E,protein_coding	15.5116	1.54091	2.03369	0.491254	3.13669	0.00170868	0.0678304
ENSG00000273015.2,RP11-352M15.2,lincRNA	1127.73	-0.750035	-0.791379	0.239014	-3.13804	0.0017008	0.0678304
ENSG00000185615.15,PDIA2,protein_coding	58.8515	-1.5079	-2.06304	0.48084	-3.13598	0.00171282	0.0678304
ENSG00000167850.3,CD300C,protein_coding	21.3454	1.26511	1.54782	0.4034	3.13612	0.00171198	0.0678304
ENSG00000126458.3,RRAS,protein_coding	84.098	0.916119	1.00271	0.291965	3.13777	0.00170236	0.0678304
ENSG00000089012.14,SIRPG,protein_coding	2.33178	1.63288	2.14793	0.520481	3.13725	0.00170541	0.0678304
ENSG00000100092.20,SH3BP1,protein_coding	176.864	0.66483	0.689047	0.211795	3.13903	0.00169508	0.0678304
ENSG00000237622.1,TCEB1P18,processed_pseudogene	26.2098	-1.57606	-2.13774	0.502762	-3.13481	0.00171963	0.0679509
ENSG00000126561.16,STAT5A,protein_coding	224.366	0.68559	0.715431	0.218718	3.13459	0.00172095	0.0679509
ENSG00000105185.11,PDCD5,protein_coding	513.486	-0.567636	-0.582952	0.181121	-3.13402	0.00172431	0.0679831
ENSG00000177707.10,PVRL3,protein_coding	790.026	1.44055	1.80218	0.459891	3.13238	0.00173395	0.0682624
ENSG00000198951.11,NAGA,protein_coding	406.001	0.57281	0.592622	0.182909	3.13167	0.00173816	0.0683276
ENSG00000172236.16,TPSAB1,protein_coding	9.28812	1.76209	2.00304	0.562787	3.13101	0.00174207	0.0683806
ENSG00000026751.16,SLAMF7,protein_coding	21.5744	1.31821	1.57879	0.42116	3.12995	0.00174834	0.0683906
ENSG00000223865.10,HLA-DPB1,protein_coding	610.498	1.09088	1.21935	0.348546	3.1298	0.00174924	0.0683906
ENSG00000111644.7,ACRBP,protein_coding	24.7208	0.970826	1.05676	0.310227	3.1294	0.00175162	0.0683906
ENSG00000140391.14,TSPAN3,protein_coding	4180.88	-0.519967	-0.529462	0.166186	-3.12882	0.00175511	0.0683906
ENSG00000182397.14,DNM1P46,transcribed_unprocessed_pseudogene	20.0519	1.49806	1.86373	0.478784	3.1289	0.00175465	0.0683906
ENSG00000144802.11,NFKBIZ,protein_coding	711.569	0.988633	1.06563	0.316275	3.12587	0.00177282	0.0687796
ENSG00000271503.5,CCL5,protein_coding	33.8358	1.2744	1.48646	0.407682	3.12598	0.00177214	0.0687796
ENSG00000167232.13,ZNF91,protein_coding	4733.4	-0.61548	-0.63604	0.196849	-3.12665	0.00176807	0.0687796
ENSG00000152463.14,OLAH,protein_coding	3.91829	1.66255	2.82475	0.532185	3.12401	0.00178404	0.0689149
ENSG00000100450.12,GZMH,protein_coding	2.49119	1.72195	2.86697	0.551061	3.1248	0.00177928	0.0689149
ENSG00000142556.18,ZNF614,protein_coding	413.857	-0.599231	-0.614395	0.191812	-3.12405	0.00178381	0.0689149
ENSG00000268205.1,CTC-444N24.11,lincRNA	2310.53	-0.724747	-0.758833	0.232274	-3.12023	0.00180712	0.0697057
ENSG00000163874.8,ZC3H12A,protein_coding	103.414	0.76754	0.802261	0.246103	3.11878	0.00181603	0.0697476
ENSG00000184988.8,TMEM106A,protein_coding	357.409	0.761227	0.799696	0.24404	3.11927	0.00181298	0.0697476
ENSG00000160185.14,UBASH3A,protein_coding	6.09666	1.56339	2.16062	0.501226	3.11914	0.00181381	0.0697476
ENSG00000132773.11,TOE1,protein_coding	128.345	0.706286	0.73925	0.226515	3.11805	0.00182052	0.0698197
ENSG00000089639.10,GMIP,protein_coding	334.525	0.669413	0.694743	0.214962	3.1141	0.00184507	0.0706597
ENSG00000134463.14,ECHDC3,protein_coding	9.92647	1.52456	2.1189	0.489738	3.11301	0.0018519	0.0708199
ENSG00000100722.18,ZC3H14,protein_coding	2145.78	-0.43204	-0.437706	0.138812	-3.11242	0.00185558	0.0708592
ENSG00000187513.8,GJA4,protein_coding	39.9469	1.08694	1.24876	0.34931	3.11167	0.00186029	0.070938
ENSG00000183145.8,RIPPLY3,protein_coding	12.7246	1.73084	2.85121	0.556508	3.11019	0.00186967	0.0711938
ENSG00000204252.12,HLA-DOA,protein_coding	335.213	1.15429	1.31208	0.37126	3.1091	0.00187656	0.0712631
ENSG00000110693.15,SOX6,protein_coding	3654.1	-0.826068	-0.890054	0.265697	-3.10906	0.00187685	0.0712631
ENSG00000186230.6,ZNF749,protein_coding	316.238	-0.791574	-0.840252	0.254636	-3.10864	0.00187948	0.0712631
ENSG00000125347.13,IRF1,protein_coding	591.568	0.752264	0.790413	0.242182	3.10619	0.00189515	0.0715657
ENSG00000182255.6,KCNA4,protein_coding	14.2684	-1.54581	-2.13406	0.497665	-3.10614	0.0018955	0.0715657
ENSG00000134755.14,DSC2,protein_coding	133.096	1.20007	1.38534	0.386309	3.1065	0.00189314	0.0715657
ENSG00000175161.13,CADM2,protein_coding	2381.88	-1.41034	-1.83885	0.454166	-3.10535	0.00190056	0.0716557
ENSG00000281453.1,TGFB2-OT1,3prime_overlapping_ncrna	187.894	-1.54284	-2.12716	0.496907	-3.10488	0.00190357	0.071668
ENSG00000166971.16,AKTIP,protein_coding	495.546	-0.540705	-0.554758	0.174203	-3.10387	0.00191005	0.0718109
ENSG00000259563.1,CTD-2329K10.1,antisense	2.63192	-1.62647	-2.46824	0.524163	-3.10298	0.00191586	0.071928
ENSG00000117174.10,ZNHIT6,protein_coding	536.869	-0.577665	-0.593314	0.186513	-3.09719	0.00195368	0.0726338
ENSG00000160791.13,CCR5,protein_coding	71.5416	1.01802	1.12619	0.328571	3.09832	0.00194619	0.0726338
ENSG00000255031.5,RP11-802E16.3,antisense	37.8215	1.1682	1.33457	0.377163	3.09734	0.00195269	0.0726338
ENSG00000278469.1,Metazoa_SRP,misc_RNA	4.94828	1.50244	1.96546	0.48479	3.09915	0.00194077	0.0726338
ENSG00000182511.11,FES,protein_coding	138.627	0.775446	0.818553	0.250298	3.09809	0.00194774	0.0726338
ENSG00000134602.15,STK26,protein_coding	17.1463	1.15621	1.31829	0.373214	3.09799	0.00194841	0.0726338
ENSG00000101977.19,MCF2,protein_coding	26.1209	-1.56805	-2.25565	0.506151	-3.09799	0.00194839	0.0726338
ENSG00000164877.18,MICALL2,protein_coding	2253.08	0.936205	1.0069	0.302469	3.09521	0.00196674	0.0729167
ENSG00000257624.1,RP1-128M12.3,processed_pseudogene	2.63842	1.72169	3.63602	0.556211	3.09539	0.00196553	0.0729167
ENSG00000124882.3,EREG,protein_coding	18.6943	1.52735	1.92023	0.493635	3.09408	0.00197426	0.0730941
ENSG00000188820.12,FAM26F,protein_coding	20.8864	1.36051	1.699	0.439895	3.0928	0.00198276	0.0732801
ENSG00000279396.1,AC130469.1,TEC	11.6689	1.23981	1.45267	0.400908	3.0925	0.00198477	0.0732801
ENSG00000249464.5,LINC01091,lincRNA	46.9835	1.00717	1.12144	0.325922	3.09023	0.00200001	0.0733578
ENSG00000059377.15,TBXAS1,protein_coding	251.272	0.926344	1.01365	0.299686	3.09104	0.00199454	0.0733578
ENSG00000148834.12,GSTO1,protein_coding	141.168	0.997244	1.11744	0.322704	3.09027	0.00199972	0.0733578
ENSG00000166164.15,BRD7,protein_coding	1268.77	-0.45823	-0.466282	0.148285	-3.0902	0.00200019	0.0733578
ENSG00000141293.15,SKAP1,protein_coding	6.41272	1.55178	2.02975	0.50217	3.09014	0.00200059	0.0733578
ENSG00000154380.17,ENAH,protein_coding	5158.13	-0.685647	-0.718277	0.222006	-3.08842	0.00201225	0.073684
ENSG00000234667.1,ACTBP13,unitary_pseudogene	4.08144	-1.70848	-3.32957	0.553348	-3.08753	0.00201825	0.0738027
ENSG00000253276.2,CCDC71L,protein_coding	340.779	1.263	1.48896	0.409316	3.08564	0.00203117	0.0740725
ENSG00000100385.13,IL2RB,protein_coding	34.6339	1.2518	1.46524	0.405654	3.08587	0.00202958	0.0740725
ENSG00000146054.17,TRIM7,protein_coding	30.4816	-1.21104	-1.40771	0.392615	-3.08455	0.00203862	0.074243
ENSG00000172932.14,ANKRD13D,protein_coding	625.322	0.402603	0.408374	0.130547	3.08397	0.00204257	0.0742855
ENSG00000234737.1,KRT18P15,processed_pseudogene	6.59504	1.47265	1.92734	0.477609	3.08338	0.00204666	0.0743334
ENSG00000143570.17,SLC39A1,protein_coding	776.944	0.643198	0.669311	0.208653	3.08262	0.00205185	0.0744207
ENSG00000010030.13,ETV7,protein_coding	30.1761	1.31802	1.61838	0.427862	3.08049	0.00206662	0.0748548
ENSG00000204287.13,HLA-DRA,protein_coding	2067.91	1.09633	1.23223	0.356293	3.07706	0.00209055	0.0756192
ENSG00000160051.11,IQCC,protein_coding	72.0421	0.682246	0.714635	0.22184	3.0754	0.00210221	0.0757733
ENSG00000091181.19,IL5RA,protein_coding	8.34273	1.72553	3.59652	0.561105	3.07524	0.00210332	0.0757733
ENSG00000267328.1,AC002398.12,antisense	5.87325	-1.68227	-2.81723	0.546998	-3.07545	0.00210183	0.0757733
ENSG00000228962.1,HCG23,antisense	5.20634	-1.61817	-2.38446	0.526351	-3.07432	0.00210984	0.075906
ENSG00000224184.5,MIR3681HG,lincRNA	11.8318	-1.43056	-1.81161	0.465535	-3.07293	0.00211969	0.0761577
ENSG00000267508.5,ZNF285,protein_coding	287.202	-0.911156	-0.990857	0.296596	-3.07205	0.00212595	0.0762803
ENSG00000275850.1,RP11-543P15.3,sense_intronic	47.1259	1.13501	1.28399	0.369609	3.07085	0.00213451	0.0764845
ENSG00000255833.1,TIFAB,protein_coding	4.54874	1.52298	2.06812	0.496454	3.06771	0.00215705	0.0771889
ENSG00000157103.10,SLC6A1,protein_coding	2011.57	-1.20843	-1.38316	0.394326	-3.06455	0.00218001	0.0777692
ENSG00000225473.1,ATP13A4-AS1,antisense	3.62403	-1.58325	-2.18711	0.516696	-3.06418	0.00218267	0.0777692
ENSG00000005884.17,ITGA3,protein_coding	1567.85	1.26745	1.52663	0.413668	3.06393	0.00218448	0.0777692
ENSG00000168995.13,SIGLEC7,protein_coding	22.5937	1.26155	1.51167	0.41175	3.06387	0.0021849	0.0777692
ENSG00000137393.9,RNF144B,protein_coding	320.175	0.876095	0.939266	0.286081	3.0624	0.00219571	0.0778429
ENSG00000160593.17,AMICA1,protein_coding	82.2216	1.36155	1.67206	0.444547	3.06277	0.00219296	0.0778429
ENSG00000154096.13,THY1,protein_coding	1500.88	0.918917	1.00522	0.300037	3.06268	0.00219365	0.0778429
ENSG00000117448.13,AKR1A1,protein_coding	425.08	0.485971	0.49768	0.158815	3.05999	0.00221346	0.0782958
ENSG00000242574.8,HLA-DMB,protein_coding	698.522	0.978545	1.07109	0.319815	3.05973	0.0022154	0.0782958
ENSG00000155465.18,SLC7A7,protein_coding	158.442	0.821671	0.880117	0.268566	3.05947	0.00221727	0.0782958
ENSG00000185274.11,WBSCR17,protein_coding	244.976	-1.7215	-3.04191	0.56288	-3.05837	0.00222543	0.0783949
ENSG00000128604.18,IRF5,protein_coding	144.824	0.807405	0.861708	0.264004	3.0583	0.00222595	0.0783949
ENSG00000160446.18,ZDHHC12,protein_coding	86.8668	0.832541	0.889552	0.272294	3.05751	0.00223183	0.0784986
ENSG00000110079.16,MS4A4A,protein_coding	128.863	1.20584	1.39866	0.394593	3.05591	0.00224379	0.0788158
ENSG00000250899.3,RP11-253E3.3,lincRNA	70.3483	1.04292	1.15478	0.341362	3.05516	0.00224941	0.0789095
ENSG00000228252.8,COL6A4P2,unitary_pseudogene	22.0511	1.42912	1.84518	0.468025	3.05351	0.00226183	0.0791376
ENSG00000268403.2,CTD-2371O3.3,antisense	83.7805	-0.867852	-0.937343	0.284202	-3.05365	0.00226079	0.0791376
ENSG00000132429.9,POPDC3,protein_coding	17.2429	1.59429	2.43838	0.522319	3.05233	0.00227071	0.0793441
ENSG00000181378.13,CCDC108,protein_coding	22.2594	1.41625	1.57099	0.464158	3.05123	0.00227903	0.0794272
ENSG00000008853.16,RHOBTB2,protein_coding	586.228	0.661622	0.691552	0.216831	3.05133	0.0022783	0.0794272
ENSG00000257267.2,ZNF271P,unitary_pseudogene	1018.86	-0.340392	-0.343781	0.111575	-3.05078	0.0022825	0.0794446
ENSG00000160352.15,ZNF714,protein_coding	1200.52	-0.697255	-0.728939	0.228589	-3.05026	0.00228646	0.079479
ENSG00000172818.9,OVOL1,protein_coding	2.48307	-1.63096	-2.41598	0.535017	-3.04843	0.00230041	0.0798601
ENSG00000105339.10,DENND3,protein_coding	1598.56	0.826128	0.887843	0.271037	3.04803	0.0023035	0.0798637
ENSG00000187583.10,PLEKHN1,protein_coding	4.05649	1.62419	2.34516	0.532953	3.04754	0.00230726	0.079882
ENSG00000169692.12,AGPAT2,protein_coding	88.1762	0.986004	1.094	0.323587	3.04711	0.00231053	0.079882
ENSG00000135720.12,DYNC1LI2,protein_coding	5965.92	-0.517051	-0.530787	0.169704	-3.04679	0.002313	0.079882
ENSG00000135341.17,MAP3K7,protein_coding	1211.2	-0.38968	-0.39459	0.127947	-3.04562	0.00232199	0.0800893
ENSG00000142669.13,SH3BGRL3,protein_coding	701.647	0.611922	0.633924	0.200957	3.04504	0.00232651	0.0801415
ENSG00000160211.15,G6PD,protein_coding	336.395	0.700982	0.734571	0.23035	3.04311	0.00234144	0.0805521
ENSG00000117676.13,RPS6KA1,protein_coding	245.237	0.842836	0.911489	0.277146	3.04113	0.00235691	0.0806021
ENSG00000277199.1,CH17-125A10.2,lincRNA	9.9547	1.70705	3.67837	0.561142	3.0421	0.00234935	0.0806021
ENSG00000044524.10,EPHA3,protein_coding	1012.17	1.47223	1.85285	0.484219	3.04042	0.00236251	0.0806021
ENSG00000110031.12,LPXN,protein_coding	199.714	0.549139	0.563125	0.180603	3.04058	0.00236125	0.0806021
ENSG00000166863.11,TAC3,protein_coding	21.7338	-1.66528	-2.58251	0.547542	-3.04137	0.00235504	0.0806021
ENSG00000161551.12,ZNF577,protein_coding	838.561	-0.689337	-0.721299	0.226738	-3.04023	0.002364	0.0806021
ENSG00000170909.13,OSCAR,protein_coding	49.0207	0.948526	1.03243	0.311979	3.04035	0.00236304	0.0806021
ENSG00000186648.14,LRRC16B,protein_coding	192.657	-0.773741	-0.818149	0.254542	-3.03974	0.00236783	0.08063
ENSG00000151806.13,GUF1,protein_coding	787.119	-0.391907	-0.397747	0.128962	-3.03894	0.00237412	0.0806682
ENSG00000270638.1,RP3-466P17.1,lincRNA	38.5713	-1.06723	-1.18745	0.351198	-3.03883	0.00237499	0.0806682
ENSG00000276101.1,RP11-455O6.8,antisense	10.9661	-1.28404	-1.57895	0.422683	-3.03784	0.00238282	0.080729
ENSG00000101752.11,MIB1,protein_coding	2490.08	-0.445709	-0.453509	0.146706	-3.0381	0.00238072	0.080729
ENSG00000054523.17,KIF1B,protein_coding	10150.3	-0.519167	-0.530511	0.171111	-3.0341	0.00241257	0.0809165
ENSG00000181585.3,TMIE,protein_coding	68.3484	1.45292	1.92433	0.478736	3.0349	0.00240618	0.0809165
ENSG00000165178.9,NCF1C,unprocessed_pseudogene	22.4833	1.32007	1.73845	0.434995	3.03468	0.0024079	0.0809165
ENSG00000197093.10,GAL3ST4,protein_coding	526.699	0.633271	0.656612	0.208597	3.03587	0.00239846	0.0809165
ENSG00000175538.10,KCNE3,protein_coding	208.446	0.922123	1.00574	0.3039	3.03429	0.00241101	0.0809165
ENSG00000153531.13,ADPRHL1,protein_coding	85.4365	1.02079	1.12374	0.336195	3.03629	0.00239511	0.0809165
ENSG00000198909.7,MAP3K3,protein_coding	497.029	0.442541	0.45044	0.145812	3.03501	0.0024053	0.0809165
ENSG00000108679.12,LGALS3BP,protein_coding	1792.49	0.974589	1.08488	0.321157	3.03462	0.00240842	0.0809165
ENSG00000231389.7,HLA-DPA1,protein_coding	1546.22	1.05895	1.18387	0.349077	3.03357	0.00241679	0.0809566
ENSG00000185920.15,PTCH1,protein_coding	1387.3	-1.14698	-1.31349	0.378287	-3.03205	0.002429	0.081162
ENSG00000050555.17,LAMC3,protein_coding	353.085	1.22141	1.43817	0.402802	3.0323	0.00242701	0.081162
ENSG00000261239.6,ANKRD26P1,transcribed_unprocessed_pseudogene	2.5479	-1.65949	-3.29027	0.547494	-3.03106	0.00243696	0.0813263
ENSG00000121807.5,CCR2,protein_coding	14.306	1.47314	1.8988	0.486186	3.03	0.00244557	0.0815118
ENSG00000179603.17,GRM8,protein_coding	125.531	1.02521	1.136	0.338409	3.02951	0.00244948	0.0815405
ENSG00000180509.11,KCNE1,protein_coding	56.7153	1.18307	1.34995	0.390609	3.02878	0.00245544	0.0816372
ENSG00000248485.1,PCP4L1,protein_coding	29.3594	-1.57069	-2.37149	0.518842	-3.0273	0.00246748	0.0816376
ENSG00000277954.1,RP11-679B19.1,antisense	78.4402	-1.31267	-1.58212	0.433596	-3.02741	0.00246657	0.0816376
ENSG00000188283.11,ZNF383,protein_coding	576.483	-0.624148	-0.647803	0.206112	-3.0282	0.00246018	0.0816376
ENSG00000155307.17,SAMSN1,protein_coding	160.443	0.923394	1.01986	0.305024	3.02728	0.00246767	0.0816376
ENSG00000135047.14,CTSL,protein_coding	484.793	0.841306	0.906997	0.278124	3.02493	0.0024869	0.0821721
ENSG00000016391.10,CHDH,protein_coding	491.897	-0.730357	-0.76375	0.241545	-3.02369	0.00249716	0.0822276
ENSG00000072786.12,STK10,protein_coding	644.096	0.683741	0.711344	0.226134	3.02362	0.00249773	0.0822276
ENSG00000205502.3,C2CD4B,protein_coding	7.02579	1.62113	2.43804	0.536156	3.02361	0.0024978	0.0822276
ENSG00000204789.4,ZNF204P,processed_pseudogene	176.593	-0.937744	-1.02321	0.31018	-3.02322	0.00250096	0.0822303
ENSG00000269400.1,CTD-2529P6.4,sense_intronic	5.29339	-1.60276	-2.35507	0.530389	-3.02185	0.00251233	0.0825026
ENSG00000100916.13,BRMS1L,protein_coding	225.544	-0.595421	-0.61374	0.19708	-3.02121	0.00251766	0.0825761
ENSG00000183935.5,HTR7P1,transcribed_processed_pseudogene	80.019	0.738275	0.776983	0.244408	3.02067	0.00252219	0.0826104
ENSG00000171681.12,ATF7IP,protein_coding	5007.79	-0.500604	-0.512939	0.165764	-3.01997	0.00252797	0.0826104
ENSG00000223750.1,SIRPB3P,unprocessed_pseudogene	2.55619	-1.64724	-2.59018	0.545409	-3.02019	0.00252617	0.0826104
ENSG00000179941.6,BBS10,protein_coding	396.988	-0.420614	-0.427952	0.139358	-3.01823	0.00254259	0.0829865
ENSG00000162542.13,TMCO4,protein_coding	130.892	0.863126	0.943825	0.286316	3.01459	0.00257328	0.0837836
ENSG00000163131.10,CTSS,protein_coding	529.538	1.02696	1.13959	0.340661	3.01459	0.00257325	0.0837836
ENSG00000177556.11,ATOX1,protein_coding	267.468	0.469003	0.478989	0.155726	3.01172	0.00259774	0.0838161
ENSG00000119383.19,PPP2R4,protein_coding	1080.12	0.60945	0.633244	0.202433	3.01062	0.00260714	0.0838161
ENSG00000130600.15,H19,processed_transcript	2423.32	-1.63375	-3.30637	0.542688	-3.01048	0.00260834	0.0838161
ENSG00000135090.13,TAOK3,protein_coding	1624.16	-0.565856	-0.583126	0.187874	-3.01189	0.00259628	0.0838161
ENSG00000264937.1,AC100830.5,antisense	3.97528	-1.42946	-1.89722	0.474831	-3.01046	0.00260856	0.0838161
ENSG00000260152.2,RP11-69H7.4,processed_pseudogene	14.1286	-1.30026	-1.60849	0.431403	-3.01403	0.00257799	0.0838161
ENSG00000213853.9,EMP2,protein_coding	433.172	1.15412	1.32057	0.383259	3.01134	0.00260101	0.0838161
ENSG00000264754.1,CTD-2653B5.1,sense_intronic	26.5291	-1.1657	-1.35804	0.386867	-3.01317	0.0025853	0.0838161
ENSG00000233393.1,AP000688.29,lincRNA	50.3324	-1.40105	-1.96165	0.465399	-3.01043	0.00260877	0.0838161
ENSG00000130489.12,SCO2,protein_coding	80.8885	0.884665	0.954337	0.29359	3.01326	0.00258456	0.0838161
ENSG00000215284.2,RP11-198M15.1,processed_pseudogene	3.3909	1.44904	1.97917	0.481218	3.0112	0.00260221	0.0838161
ENSG00000257336.1,PRELID2P1,processed_pseudogene	6.43739	1.5268	7.82206	0.507382	3.00916	0.00261969	0.0840661
ENSG00000260077.1,RP11-254F7.2,lincRNA	26.8283	1.12116	1.28131	0.372639	3.00869	0.00262375	0.0840951
ENSG00000279796.1,RP11-317F20.3,TEC	17.8059	-1.34521	-1.66649	0.447322	-3.00725	0.00263621	0.0843936
ENSG00000173218.14,VANGL1,protein_coding	306.126	0.994703	1.11056	0.331006	3.00509	0.00265501	0.0845742
ENSG00000153071.14,DAB2,protein_coding	984.778	0.867617	0.92818	0.288685	3.0054	0.00265228	0.0845742
ENSG00000234882.1,EIF3EP1,processed_pseudogene	107.996	-0.826203	-0.884953	0.274936	-3.00507	0.0026552	0.0845742
ENSG00000033100.14,CHPF2,protein_coding	1388.38	0.60567	0.625171	0.201475	3.00618	0.00264553	0.0845742
ENSG00000123892.11,RAB38,protein_coding	21.5468	1.25862	1.47769	0.418873	3.00479	0.00265768	0.0845742
ENSG00000272733.1,KB-208E9.1,lincRNA	9.29889	-1.19875	-1.41645	0.399032	-3.00413	0.00266339	0.0846552
ENSG00000250274.1,CTB-114C7.4,lincRNA	2.46288	1.58679	2.50198	0.528475	3.00257	0.00267706	0.0849887
ENSG00000188629.11,ZNF177,protein_coding	168.623	-0.936184	-1.03703	0.312008	-3.00051	0.00269525	0.0854648
ENSG00000171302.16,CANT1,protein_coding	590.822	0.526615	0.541621	0.175574	2.9994	0.00270512	0.085676
ENSG00000256193.5,LINC00507,lincRNA	2.48515	-1.64005	-7.44388	0.546898	-2.99882	0.00271028	0.0857379
ENSG00000176595.3,KBTBD11,protein_coding	1215.88	-1.09501	-1.24607	0.365267	-2.99783	0.00271913	0.0859162
ENSG00000271086.5,NAMA,lincRNA	47.2088	-1.18951	-1.41223	0.397062	-2.99577	0.00273751	0.0863949
ENSG00000184908.17,CLCNKB,protein_coding	5.82348	1.5479	2.29065	0.517248	2.99258	0.00276632	0.086996
ENSG00000183508.4,FAM46C,protein_coding	118.733	1.13044	1.2932	0.377735	2.99268	0.00276541	0.086996
ENSG00000105552.14,BCAT2,protein_coding	427.218	-0.738765	-0.777136	0.246814	-2.9932	0.0027607	0.086996
ENSG00000279616.1,RP1-102H19.7,TEC	64.086	-0.907208	-0.991124	0.303243	-2.99168	0.00277445	0.0871491
ENSG00000279708.1,CTD-2335A18.2,TEC	5.41391	-1.48087	-2.35691	0.49524	-2.99021	0.00278787	0.0874677
ENSG00000139329.4,LUM,protein_coding	221.608	1.42844	1.83238	0.477768	2.98982	0.00279146	0.0874777
ENSG00000171812.11,COL8A2,protein_coding	183.487	0.99688	1.12573	0.333659	2.98772	0.00281068	0.0877299
ENSG00000118454.12,ANKRD13C,protein_coding	688.578	-0.410424	-0.416408	0.13738	-2.98751	0.00281263	0.0877299
ENSG00000121957.12,GPSM2,protein_coding	1351.24	-0.896486	-0.967755	0.300013	-2.98815	0.00280669	0.0877299
ENSG00000091137.11,SLC26A4,protein_coding	31.0389	-1.11562	-1.26875	0.373344	-2.98819	0.00280631	0.0877299
ENSG00000068001.13,HYAL2,protein_coding	404.568	0.615079	0.641126	0.205927	2.98687	0.00281846	0.0878066
ENSG00000134595.7,SOX3,protein_coding	30.9233	1.63444	3.00256	0.54727	2.98653	0.00282166	0.0878066
ENSG00000228137.1,AP001469.7,antisense	7.53346	-1.32873	-1.71669	0.444983	-2.98602	0.00282631	0.0878489
ENSG00000175040.5,CHST2,protein_coding	703.275	0.924463	1.05264	0.309662	2.9854	0.00283209	0.0878977
ENSG00000113263.12,ITK,protein_coding	56.7327	1.31807	1.60817	0.441603	2.98473	0.00283826	0.0878977
ENSG00000270704.3,RP11-701H24.5,sense_intronic	184.223	-1.01153	-1.12037	0.338936	-2.98443	0.00284103	0.0878977
ENSG00000177576.11,C18orf32,protein_coding	679.365	-0.454079	-0.46143	0.152148	-2.98445	0.00284093	0.0878977
ENSG00000278926.1,RP11-264M12.4,TEC	12.1266	1.51215	1.96975	0.507222	2.98124	0.0028708	0.088716
ENSG00000205189.11,ZBTB10,protein_coding	1843.8	-0.521644	-0.534216	0.175013	-2.9806	0.00287689	0.0888015
ENSG00000244509.3,APOBEC3C,protein_coding	260.416	0.794328	0.850473	0.266681	2.97857	0.00289599	0.089288
ENSG00000163219.11,ARHGAP25,protein_coding	170.706	0.749152	0.799905	0.251645	2.97703	0.00291059	0.0896349
ENSG00000140522.11,RLBP1,protein_coding	32.8123	-1.15122	-1.35113	0.386754	-2.97661	0.00291451	0.0896521
ENSG00000197948.10,FCHSD1,protein_coding	420.217	0.749657	0.788603	0.252074	2.97396	0.00293984	0.0901204
ENSG00000164535.14,DAGLB,protein_coding	459.583	0.462196	0.470546	0.155383	2.97456	0.00293407	0.0901204
ENSG00000278376.1,RP11-158I9.8,lincRNA	37.928	-0.843586	-0.915531	0.283643	-2.97412	0.00293833	0.0901204
ENSG00000158869.10,FCER1G,protein_coding	264.872	0.828734	0.888854	0.27882	2.97229	0.00295585	0.0903004
ENSG00000272750.1,RP11-378J18.8,antisense	56.273	-0.710191	-0.743892	0.238926	-2.97243	0.00295456	0.0903004
ENSG00000108639.7,SYNGR2,protein_coding	321.612	0.818271	0.880409	0.275278	2.97253	0.00295358	0.0903004
ENSG00000185924.6,RTN4RL1,protein_coding	13.448	-1.62716	-2.75957	0.547629	-2.97129	0.00296551	0.0904919
ENSG00000171916.16,LGALS9C,protein_coding	2.65451	1.58305	2.53101	0.532889	2.9707	0.00297121	0.0905625
ENSG00000168477.17,TNXB,protein_coding	1013.43	-0.966844	-1.06103	0.325554	-2.96984	0.0029795	0.0906661
ENSG00000122691.12,TWIST1,protein_coding	67.6684	1.27154	1.57332	0.42818	2.96965	0.00298139	0.0906661
ENSG00000272562.1,RP11-396C23.4,antisense	10.0888	-1.28449	-1.56656	0.432672	-2.96875	0.00299018	0.0907129
ENSG00000174145.7,NWD2,protein_coding	7.51117	-1.51392	-2.16754	0.510204	-2.96729	0.00300438	0.0907129
ENSG00000071205.11,ARHGAP10,protein_coding	420.454	0.693123	0.724981	0.233679	2.96613	0.00301568	0.0907129
ENSG00000250037.1,RP11-480D4.4,unprocessed_pseudogene	18.1758	-1.41942	-1.88886	0.478648	-2.96549	0.00302205	0.0907129
ENSG00000164330.16,EBF1,protein_coding	249.282	0.993939	1.08622	0.334791	2.96884	0.00298927	0.0907129
ENSG00000237513.1,RP11-325F22.2,lincRNA	6.43358	1.51898	2.14005	0.511714	2.96842	0.00299336	0.0907129
ENSG00000245857.2,GS1-24F4.2,lincRNA	6.01556	1.50472	2.03635	0.507332	2.96595	0.00301754	0.0907129
ENSG00000279662.1,RP11-609N14.4,TEC	30.35	1.3488	1.67691	0.454747	2.96605	0.00301651	0.0907129
ENSG00000140905.9,GCSH,protein_coding	379.071	-0.706345	-0.734845	0.238153	-2.96593	0.00301768	0.0907129
ENSG00000176845.12,METRNL,protein_coding	213.318	0.897509	0.973113	0.302668	2.96532	0.00302365	0.0907129
ENSG00000235890.2,TSPEAR-AS1,antisense	2.66822	1.5785	2.30836	0.532157	2.96622	0.00301481	0.0907129
ENSG00000179542.15,SLITRK4,protein_coding	66.4854	-1.51403	-2.28802	0.510474	-2.96592	0.00301777	0.0907129
ENSG00000171777.15,RASGRP4,protein_coding	48.2944	0.919271	1.01286	0.310175	2.96372	0.00303945	0.0910846
ENSG00000162511.7,LAPTM5,protein_coding	2137.71	0.891297	0.970184	0.300837	2.96272	0.00304932	0.0912783
ENSG00000168959.14,GRM5,protein_coding	236.866	-1.42761	-1.96662	0.481957	-2.96211	0.00305542	0.0913583
ENSG00000139174.10,PRICKLE1,protein_coding	333.292	1.03465	1.12734	0.349473	2.96059	0.0030705	0.0917066
ENSG00000279960.1,RP5-1181K21.4,TEC	4.3383	-1.63825	-3.27194	0.553704	-2.95872	0.00308919	0.0919631
ENSG00000158815.10,FGF17,protein_coding	76.3692	-1.43099	-2.08559	0.483656	-2.9587	0.0030894	0.0919631
ENSG00000260198.1,RP11-441F2.2,sense_intronic	80.4202	-1.06446	-1.22013	0.359737	-2.95898	0.00308654	0.0919631
ENSG00000132517.14,SLC52A1,protein_coding	7.54387	1.43445	1.80577	0.485005	2.95759	0.00310054	0.0921918
ENSG00000155330.9,C16orf87,protein_coding	314.48	-0.505919	-0.518911	0.171098	-2.95689	0.00310756	0.0922979
ENSG00000157077.14,ZFYVE9,protein_coding	932.341	-0.433926	-0.440929	0.146789	-2.95613	0.00311528	0.0924053
ENSG00000279125.1,RP11-417J1.4,TEC	21.0688	-1.4155	-1.85652	0.478882	-2.95585	0.00311809	0.0924053
ENSG00000075651.15,PLD1,protein_coding	370.79	0.845265	0.916544	0.286129	2.95414	0.00313541	0.0927915
ENSG00000188517.14,COL25A1,protein_coding	179.339	-1.58077	-2.14243	0.53515	-2.95388	0.00313806	0.0927915
ENSG00000113721.13,PDGFRB,protein_coding	1830.78	0.919409	1.00997	0.311305	2.95341	0.00314289	0.0928315
ENSG00000220685.3,RP11-530A18.1,processed_pseudogene	10.4172	-1.21984	-1.45377	0.413085	-2.95299	0.00314709	0.0928531
ENSG00000128641.18,MYO1B,protein_coding	1417.22	0.987685	1.12969	0.334791	2.95016	0.00317613	0.0935034
ENSG00000176566.4,DCAF4L2,protein_coding	79.0803	-1.46002	-2.1494	0.494892	-2.95017	0.00317598	0.0935034
ENSG00000172578.11,KLHL6,protein_coding	249.964	1.01092	1.12346	0.342739	2.94952	0.00318264	0.0935921
ENSG00000179455.7,MKRN3,protein_coding	613.526	-0.902092	-0.990232	0.305914	-2.94884	0.00318965	0.0936951
ENSG00000100604.12,CHGA,protein_coding	92.1739	-1.54339	-2.6813	0.523523	-2.94809	0.00319745	0.0938212
ENSG00000068078.17,FGFR3,protein_coding	1222.23	-1.27723	-1.54046	0.433294	-2.94771	0.00320134	0.0938322
ENSG00000082126.17,MPP4,protein_coding	22.4844	1.34141	1.71745	0.455379	2.94569	0.00322232	0.0940559
ENSG00000164588.5,HCN1,protein_coding	29.0473	-1.62708	-2.99061	0.552331	-2.94585	0.00322065	0.0940559
ENSG00000178199.13,ZC3H12D,protein_coding	73.6611	0.839492	0.896346	0.284996	2.94562	0.00322305	0.0940559
ENSG00000165171.10,WBSCR27,protein_coding	22.176	1.1809	1.39035	0.400784	2.94647	0.00321426	0.0940559
ENSG00000256481.1,RP11-21A7A.4,antisense	8.44458	-1.48203	-2.18816	0.503214	-2.94513	0.0032282	0.0941037
ENSG00000158615.8,PPP1R15B,protein_coding	2408.95	0.86459	0.932907	0.293718	2.94361	0.00324412	0.0943869
ENSG00000115956.9,PLEK,protein_coding	296.41	0.952774	1.07583	0.323722	2.94319	0.00324851	0.0943869
ENSG00000248671.7,ALG1L9P,processed_transcript	59.0082	-0.798156	-0.859417	0.271165	-2.94343	0.00324595	0.0943869
ENSG00000163738.18,MTHFD2L,protein_coding	522.382	-0.642566	-0.670536	0.218361	-2.94267	0.00325395	0.0944422
ENSG00000196209.12,SIRPB2,protein_coding	142.895	1.02496	1.15752	0.348384	2.94205	0.00326046	0.0945287
ENSG00000275358.1,RP5-1025A1.3,lincRNA	2.67974	-1.65181	-3.49937	0.561651	-2.94099	0.00327161	0.094749
ENSG00000043591.5,ADRB1,protein_coding	52.8333	-1.27596	-1.64321	0.433951	-2.94032	0.00327872	0.0948523
ENSG00000005421.8,PON1,protein_coding	5.11823	-1.58562	-2.58673	0.539435	-2.93941	0.00328836	0.0950281
ENSG00000170545.16,SMAGP,protein_coding	36.8235	1.21587	1.50554	0.413937	2.93732	0.00331062	0.0955681
ENSG00000249430.1,CTD-2231H16.1,lincRNA	10.8645	1.62305	2.50996	0.552679	2.9367	0.00331723	0.0956556
ENSG00000066136.19,NFYC,protein_coding	477.368	0.37987	0.384565	0.129406	2.93549	0.00333023	0.095719
ENSG00000271857.1,RP1-244F24.1,antisense	7.77426	1.45506	1.98132	0.49578	2.9349	0.0033366	0.095719
ENSG00000105851.10,PIK3CG,protein_coding	186.431	0.81452	0.878627	0.277487	2.93534	0.00333182	0.095719
ENSG00000147570.9,DNAJC5B,protein_coding	3.56516	1.51191	2.20919	0.515161	2.93483	0.00333733	0.095719
ENSG00000272542.1,RP11-255P5.2,lincRNA	15.0483	-1.25355	-1.52666	0.427037	-2.93545	0.00333061	0.095719
ENSG00000130956.13,HABP4,protein_coding	484.331	-0.456895	-0.466736	0.15573	-2.9339	0.00334731	0.0959023
ENSG00000181704.11,YIPF6,protein_coding	1523.64	-0.415147	-0.421791	0.141556	-2.93275	0.00335972	0.0961548
ENSG00000227666.1,CYCSP24,processed_pseudogene	7.4213	1.39507	1.83169	0.475811	2.93198	0.00336804	0.0961869
ENSG00000100987.14,VSX1,protein_coding	24.6099	-1.4337	-1.90059	0.488965	-2.93212	0.00336659	0.0961869
ENSG00000077238.13,IL4R,protein_coding	369.663	0.918741	1.00361	0.313467	2.93091	0.00337975	0.0964185
ENSG00000231616.8,RP11-575L7.4,antisense	3.67846	-1.60496	-2.61332	0.547811	-2.92977	0.00339209	0.0965645
ENSG00000105383.14,CD33,protein_coding	107.359	0.904486	0.985946	0.308699	2.93	0.00338966	0.0965645
ENSG00000276649.1,RP5-858L17.1,antisense	166.774	-0.870405	-0.943045	0.29713	-2.92937	0.00339649	0.0965869
ENSG00000279958.1,RP11-12O16.1,TEC	11.0361	1.43934	1.99139	0.491505	2.92844	0.00340669	0.096774
ENSG00000115138.10,POMC,protein_coding	3.50645	1.48968	2.1102	0.508837	2.92761	0.00341575	0.0968254
ENSG00000178860.8,MSC,protein_coding	15.5384	1.32397	1.62976	0.452218	2.92772	0.00341452	0.0968254
ENSG00000130300.8,PLVAP,protein_coding	286.559	1.04805	1.20904	0.358048	2.92712	0.00342118	0.0968766
ENSG00000176401.5,EID2B,protein_coding	121.536	-0.640582	-0.671141	0.218872	-2.92675	0.00342526	0.0968897
ENSG00000158473.6,CD1D,protein_coding	15.6035	1.26412	1.44749	0.432055	2.92584	0.00343525	0.0970695
ENSG00000106952.7,TNFSF8,protein_coding	48.9747	1.09792	1.24593	0.375512	2.92379	0.00345798	0.0973962
ENSG00000188342.11,GTF2F2,protein_coding	345.525	-0.580515	-0.598149	0.198538	-2.92394	0.0034563	0.0973962
ENSG00000275569.1,RP11-930O11.3,antisense	14.7562	-1.26898	-1.56316	0.433953	-2.92423	0.0034531	0.0973962
ENSG00000132199.18,ENOSF1,protein_coding	743.247	0.973351	1.06724	0.33298	2.92316	0.00346503	0.0973962
ENSG00000169188.4,APEX2,protein_coding	188.716	0.471996	0.480721	0.161455	2.92339	0.00346243	0.0973962
ENSG00000142765.17,SYTL1,protein_coding	20.1494	1.07086	1.19868	0.366537	2.92156	0.00348285	0.0977942
ENSG00000205269.5,TMEM170B,protein_coding	1189.93	-0.699848	-0.73395	0.239775	-2.91877	0.00351414	0.0982722
ENSG00000106034.17,CPED1,protein_coding	181.927	0.832515	0.891706	0.285209	2.91897	0.00351194	0.0982722
ENSG00000147526.19,TACC1,protein_coding	3931.57	0.59235	0.614961	0.202989	2.91814	0.00352125	0.0982722
ENSG00000161638.10,ITGA5,protein_coding	1078.86	0.960368	1.06896	0.329109	2.91808	0.00352193	0.0982722
ENSG00000249931.4,GOLGA8K,protein_coding	30.1469	1.28859	1.57898	0.441495	2.91869	0.00351508	0.0982722
ENSG00000260257.2,RP5-1085F17.3,lincRNA	291.028	-0.540567	-0.554771	0.185223	-2.91847	0.00351756	0.0982722
ENSG00000162745.10,OLFML2B,protein_coding	311.65	1.01664	1.12927	0.348649	2.91594	0.00354616	0.0983528
ENSG00000106100.10,NOD1,protein_coding	392.33	0.661692	0.688716	0.226916	2.91602	0.00354527	0.0983528
ENSG00000174469.17,CNTNAP2,protein_coding	360.536	-1.42492	-1.99375	0.488541	-2.91668	0.00353775	0.0983528
ENSG00000204291.10,COL15A1,protein_coding	179.4	1.23386	1.40655	0.423151	2.91588	0.0035469	0.0983528
ENSG00000020577.13,SAMD4A,protein_coding	2792.38	-0.697318	-0.731725	0.239107	-2.91634	0.00354164	0.0983528
ENSG00000270011.6,ZNF559-ZNF177,protein_coding	179.313	-1.10677	-1.26003	0.379403	-2.91713	0.00353269	0.0983528
ENSG00000103381.11,CPPED1,protein_coding	263.954	0.886253	0.966044	0.303979	2.91551	0.00355112	0.0983679
ENSG00000263859.1,RP11-498C9.16,lincRNA	2.88545	-1.55561	-2.49889	0.533639	-2.91511	0.00355567	0.0983918
ENSG00000077150.17,NFKB2,protein_coding	178.428	0.754422	0.792053	0.258849	2.91453	0.00356224	0.0984718
ENSG00000133640.18,LRRIQ1,protein_coding	64.4189	1.60055	2.67593	0.549393	2.9133	0.00357635	0.0987599
ENSG00000177807.6,KCNJ10,protein_coding	2045.78	-0.853743	-0.919671	0.293096	-2.91285	0.0035815	0.0988
ENSG00000158104.11,HPD,protein_coding	19.8346	1.40896	1.93102	0.484099	2.91047	0.00360883	0.0994513
ENSG00000261801.5,LOXL1-AS1,antisense	43.9294	1.43714	1.94247	0.493904	2.90977	0.00361699	0.0995733
ENSG00000256771.2,ZNF253,protein_coding	723.366	-0.672055	-0.70265	0.231022	-2.90905	0.00362529	0.0996991
ENSG00000136634.5,IL10,protein_coding	17.3954	1.37453	1.91552	0.472643	2.90819	0.00363533	0.0998725
ENSG00000110492.15,MDK,protein_coding	619.887	1.08755	1.23848	0.374054	2.90746	0.00364373	0.100001
ENSG00000231782.6,LINC00575,lincRNA	5.15894	-1.42816	-2.22333	0.491321	-2.90678	0.00365168	0.100116
ENSG00000251867.3,RP11-48B3.5,antisense	51.3383	-0.907798	-0.994499	0.31243	-2.90561	0.00366541	0.100352
ENSG00000267731.1,RP11-147L13.8,lincRNA	105.313	-1.04096	-1.1822	0.358284	-2.9054	0.00366779	0.100352
ENSG00000250371.1,RP11-22A3.2,lincRNA	31.3513	-1.23551	-1.49046	0.425312	-2.90495	0.00367314	0.100395
ENSG00000157045.8,NTAN1,protein_coding	188.352	0.554448	0.573544	0.19095	2.90363	0.00368859	0.100715
ENSG00000143226.13,FCGR2A,protein_coding	853.675	0.824216	0.895713	0.283906	2.90313	0.00369453	0.100774
ENSG00000143412.9,ANXA9,protein_coding	4.61228	1.44323	1.73847	0.497264	2.90234	0.00370388	0.100791
ENSG00000237975.6,FLG-AS1,antisense	40.4241	1.51839	1.84655	0.5232	2.90212	0.00370645	0.100791
ENSG00000116141.15,MARK1,protein_coding	591.957	-0.676055	-0.705505	0.232927	-2.90244	0.00370273	0.100791
ENSG00000112293.14,GPLD1,protein_coding	85.5621	-0.935065	-1.02053	0.322404	-2.90029	0.00372812	0.10123
ENSG00000185869.13,ZNF829,protein_coding	337.556	-0.585874	-0.605909	0.202017	-2.90012	0.00373018	0.10123
ENSG00000113070.7,HBEGF,protein_coding	345.827	0.887436	0.974	0.306208	2.89815	0.00375376	0.101413
ENSG00000112531.16,QKI,protein_coding	24513.5	-0.566403	-0.581798	0.195425	-2.89831	0.00375179	0.101413
ENSG00000142065.13,ZFP14,protein_coding	775.677	-0.597508	-0.619445	0.206147	-2.89846	0.00375003	0.101413
ENSG00000267549.5,AC006116.17,antisense	20.7292	-1.201	-1.44172	0.414428	-2.89797	0.00375591	0.101413
ENSG00000147168.12,IL2RG,protein_coding	34.2022	1.06874	1.21345	0.368661	2.89897	0.00374393	0.101413
ENSG00000153404.13,PLEKHG4B,protein_coding	216.97	1.56919	2.2518	0.541549	2.8976	0.00376034	0.101431
ENSG00000179476.7,C14orf28,protein_coding	75.0265	-0.57496	-0.593447	0.19852	-2.89623	0.00377672	0.101667
ENSG00000268496.1,CTD-2587H19.2,sense_intronic	70.4193	-1.19475	-1.47231	0.412478	-2.89652	0.00377332	0.101667
ENSG00000169429.10,CXCL8,protein_coding	280.441	1.2907	1.60217	0.445748	2.89558	0.00378455	0.101727
ENSG00000169105.7,CHST14,protein_coding	218.512	0.588371	0.60915	0.203208	2.89542	0.00378655	0.101727
ENSG00000123552.17,USP45,protein_coding	374.126	-0.586356	-0.605661	0.20256	-2.89473	0.00379485	0.101847
ENSG00000151743.10,AMN1,protein_coding	154.223	-0.635991	-0.661742	0.219786	-2.89368	0.00380758	0.102087
ENSG00000170903.10,MSANTD4,protein_coding	937.228	-0.490128	-0.49895	0.169477	-2.892	0.00382795	0.10253
ENSG00000137992.14,DBT,protein_coding	874.913	-0.385749	-0.391276	0.133438	-2.89084	0.00384212	0.102806
ENSG00000183775.10,KCTD16,protein_coding	329.247	-1.3075	-1.70639	0.452527	-2.88932	0.00386074	0.103201
ENSG00000150681.9,RGS18,protein_coding	63.5875	1.08952	1.24742	0.377286	2.88779	0.00387954	0.103535
ENSG00000111885.6,MAN1A1,protein_coding	332.355	1.00862	1.12589	0.349283	2.88768	0.00388098	0.103535
ENSG00000249006.1,RP11-317B7.2,processed_pseudogene	23.9537	-1.15763	-1.36102	0.40099	-2.88694	0.00389012	0.103676
ENSG00000243544.3,RN7SL172P,misc_RNA	6.04354	1.37112	1.88376	0.475222	2.88523	0.00391127	0.103928
ENSG00000137310.11,TCF19,protein_coding	415.498	1.01486	1.1408	0.351669	2.88584	0.00390368	0.103928
ENSG00000268093.1,AC022154.7,antisense	2.36001	-1.59393	-3.14611	0.552433	-2.88529	0.00391058	0.103928
ENSG00000136535.14,TBR1,protein_coding	113.77	-1.43844	-2.23813	0.498697	-2.8844	0.00392159	0.104099
ENSG00000063180.8,CA11,protein_coding	175.281	-1.01922	-1.1517	0.353484	-2.88335	0.00393468	0.104343
ENSG00000048544.5,MRPS10,protein_coding	437.512	-0.365677	-0.36977	0.126863	-2.88247	0.00394574	0.104533
ENSG00000116824.4,CD2,protein_coding	16.8163	1.41405	1.85792	0.490626	2.88213	0.00394992	0.10454
ENSG00000213085.9,CFAP45,protein_coding	16.0692	1.33037	1.73835	0.461905	2.88018	0.00397452	0.105087
ENSG00000172215.5,CXCR6,protein_coding	6.29572	1.56398	2.31111	0.543124	2.8796	0.00398181	0.1051
ENSG00000176884.14,GRIN1,protein_coding	94.1225	-1.55835	-2.60729	0.541243	-2.8792	0.00398682	0.1051
ENSG00000160229.11,ZNF66,protein_coding	239.671	-0.730372	-0.781541	0.253668	-2.87925	0.00398626	0.1051
ENSG00000246820.2,RP11-379P15.1,lincRNA	10.2372	-1.19793	-1.4535	0.416172	-2.87846	0.00399628	0.105142
ENSG00000161955.16,TNFSF13,protein_coding	155.989	0.815172	0.876426	0.283177	2.87866	0.00399366	0.105142
ENSG00000277443.1,MARCKS,protein_coding	6577.25	-0.652463	-0.683202	0.226787	-2.87699	0.0040149	0.105425
ENSG00000128342.4,LIF,protein_coding	574.951	1.3503	1.65072	0.469318	2.87716	0.00401274	0.105425
ENSG00000127920.5,GNG11,protein_coding	213.851	1.03265	1.19341	0.358978	2.87664	0.00401929	0.105436
ENSG00000187492.8,CDHR4,protein_coding	21.7374	1.60902	1.84778	0.559715	2.87471	0.00404398	0.105773
ENSG00000185988.11,PLK5,protein_coding	12.4987	-1.2949	-1.5974	0.450427	-2.87483	0.00404244	0.105773
ENSG00000225975.6,LINC01534,lincRNA	50.0383	-0.889168	-0.969431	0.309277	-2.87499	0.00404036	0.105773
ENSG00000080709.14,KCNN2,protein_coding	118.328	-1.06752	-1.23781	0.371487	-2.87364	0.00405767	0.106027
ENSG00000142798.17,HSPG2,protein_coding	3535.84	0.948864	1.05882	0.330283	2.87288	0.00406748	0.106139
ENSG00000248874.5,C5orf17,lincRNA	5.06316	1.61426	4.17809	0.561986	2.87242	0.00407344	0.106139
ENSG00000196391.10,ZNF774,protein_coding	408.781	-0.725193	-0.771336	0.252471	-2.87238	0.00407387	0.106139
ENSG00000259626.2,MTND3P12,processed_pseudogene	2.45639	1.61383	3.67046	0.56194	2.8719	0.00408016	0.106199
ENSG00000279361.1,RP11-360N9.3,TEC	39.7012	-0.915594	-1.00431	0.319148	-2.86887	0.00411938	0.107017
ENSG00000072133.10,RPS6KA6,protein_coding	104.669	-1.39707	-2.0849	0.486977	-2.86886	0.00411957	0.107017
ENSG00000186583.11,SPATC1,protein_coding	3.63486	1.46841	2.10993	0.512027	2.86785	0.00413276	0.107255
ENSG00000182578.13,CSF1R,protein_coding	1255.4	0.961663	1.08309	0.335395	2.86726	0.00414043	0.107288
ENSG00000183837.9,PNMA3,protein_coding	122.308	-1.138	-1.36187	0.396911	-2.86714	0.00414204	0.107288
ENSG00000142694.6,EVA1B,protein_coding	55.5886	0.929788	1.02558	0.324403	2.86615	0.00415496	0.10731
ENSG00000274331.1,RP11-403A3.1,lincRNA	27.8029	-1.28143	-1.50488	0.447065	-2.86632	0.0041527	0.10731
ENSG00000125375.14,ATP5S,protein_coding	1080.59	-0.557386	-0.5756	0.194464	-2.86627	0.00415344	0.10731
ENSG00000100351.16,GRAP2,protein_coding	20.4621	1.26948	1.54375	0.443126	2.86482	0.00417249	0.107659
ENSG00000232677.6,LINC00665,lincRNA	911.655	-0.589261	-0.611834	0.205716	-2.86444	0.00417744	0.107683
ENSG00000180488.14,FAM73A,protein_coding	881.947	-0.41166	-0.417449	0.143749	-2.86374	0.00418668	0.107811
ENSG00000133561.15,GIMAP6,protein_coding	180.851	0.826601	0.894501	0.288672	2.86346	0.00419047	0.107811
ENSG00000130775.15,THEMIS2,protein_coding	453.459	0.949306	1.05467	0.331623	2.8626	0.00420176	0.107997
ENSG00000143452.15,HORMAD1,protein_coding	5.12615	1.41399	2.04628	0.494223	2.86103	0.00422272	0.108328
ENSG00000179583.17,CIITA,protein_coding	1841.78	0.984941	1.10029	0.34425	2.86112	0.00422146	0.108328
ENSG00000111087.9,GLI1,protein_coding	129.155	-1.39317	-1.50619	0.48713	-2.85996	0.00423689	0.108483
ENSG00000088899.14,RP5-1187M17.10,protein_coding	879.819	-0.794735	-0.869891	0.277879	-2.86001	0.00423634	0.108483
ENSG00000134668.12,SPOCD1,protein_coding	1527.34	1.28418	1.5897	0.449325	2.85802	0.00426296	0.109036
ENSG00000258068.1,RP11-328C8.5,sense_intronic	3.52024	1.60798	3.09988	0.562675	2.85774	0.00426663	0.109036
ENSG00000165383.10,LRRC18,protein_coding	4.92636	1.59558	2.58431	0.558446	2.85719	0.00427416	0.109124
ENSG00000170571.11,EMB,protein_coding	253.033	0.969902	1.07692	0.33959	2.8561	0.00428886	0.109229
ENSG00000112290.12,WASF1,protein_coding	443.402	-0.636316	-0.662602	0.222854	-2.85531	0.00429952	0.109229
ENSG00000095739.10,BAMBI,protein_coding	109.845	0.878433	0.96552	0.307641	2.85539	0.00429844	0.109229
ENSG00000165655.15,ZNF503,protein_coding	172.766	0.787642	0.845376	0.275868	2.85514	0.00430173	0.109229
ENSG00000053918.15,KCNQ1,protein_coding	95.3894	0.865776	0.943533	0.303242	2.85506	0.00430281	0.109229
ENSG00000279685.2,MAPT-IT1,sense_intronic	193.65	-1.08771	-1.27673	0.380793	-2.85644	0.00428421	0.109229
ENSG00000186446.11,ZNF501,protein_coding	278.87	-0.728091	-0.770763	0.255091	-2.85424	0.00431394	0.109408
ENSG00000213023.9,SYT3,protein_coding	45.0525	-1.15206	-1.35994	0.403736	-2.8535	0.00432409	0.109561
ENSG00000223768.1,LINC00205,lincRNA	111.33	-0.713594	-0.758522	0.250184	-2.85228	0.00434069	0.109878
ENSG00000100867.14,DHRS2,protein_coding	23.8779	1.47628	2.08931	0.517737	2.85141	0.00435264	0.109974
ENSG00000184060.10,ADAP2,protein_coding	609.488	0.722957	0.762714	0.253544	2.8514	0.00435271	0.109974
ENSG00000163220.10,S100A9,protein_coding	84.2118	1.21206	1.4755	0.425208	2.8505	0.00436505	0.109974
ENSG00000111145.7,ELK3,protein_coding	710.991	0.79199	0.853477	0.277832	2.85061	0.00436355	0.109974
ENSG00000268521.1,VN1R83P,unprocessed_pseudogene	201.246	-0.810669	-0.871667	0.284362	-2.85084	0.00436046	0.109974
ENSG00000144320.13,KIAA1715,protein_coding	1772.97	-0.430227	-0.436805	0.150967	-2.84981	0.00437451	0.110064
ENSG00000233276.3,GPX1,protein_coding	922.176	0.823377	0.897533	0.288941	2.84964	0.00437686	0.110064
ENSG00000148482.11,SLC39A12,protein_coding	47.6325	-1.37639	-1.8515	0.483282	-2.84802	0.00439927	0.110523
ENSG00000164746.13,C7orf57,protein_coding	39.6218	1.38123	1.58575	0.485166	2.84693	0.00441434	0.110559
ENSG00000242779.6,ZNF702P,transcribed_processed_pseudogene	25.6445	1.20651	1.43038	0.423824	2.84672	0.00441723	0.110559
ENSG00000233922.2,AL133493.2,lincRNA	15.0488	1.43706	2.01524	0.504793	2.84683	0.00441574	0.110559
ENSG00000157514.16,TSC22D3,protein_coding	1014.39	0.923099	1.0172	0.324248	2.84689	0.0044149	0.110559
ENSG00000123178.14,SPRYD7,protein_coding	170.868	-0.58367	-0.603243	0.205081	-2.84605	0.00442651	0.110688
ENSG00000069974.15,RAB27A,protein_coding	236.471	0.699396	0.732301	0.246004	2.84303	0.00446867	0.111638
ENSG00000149084.11,HSD17B12,protein_coding	1091.63	-0.511644	-0.523586	0.18	-2.84247	0.00447661	0.111731
ENSG00000226520.1,KIRREL-IT1,sense_intronic	25.7811	1.02136	1.13158	0.359376	2.84202	0.0044828	0.111781
ENSG00000196735.11,HLA-DQA1,protein_coding	499.345	1.15062	1.34387	0.405017	2.84092	0.00449836	0.111961
ENSG00000278919.1,AP006285.2,protein_coding	29.0094	-1.18577	-1.42289	0.417378	-2.84099	0.00449735	0.111961
ENSG00000134686.16,PHC2,protein_coding	2252.25	0.544595	0.561892	0.191744	2.84021	0.00450833	0.112
ENSG00000279722.1,RP11-44F14.6,TEC	97.8024	-0.77083	-0.825387	0.271385	-2.84035	0.00450637	0.112
ENSG00000181481.13,RNF135,protein_coding	277.506	0.593523	0.613195	0.209002	2.83979	0.00451429	0.112044
ENSG00000175928.5,LRRN1,protein_coding	1385.75	-0.865661	-0.949581	0.30492	-2.83898	0.00452577	0.112121
ENSG00000144820.7,ADGRG7,protein_coding	16.9714	1.59692	3.23386	0.562469	2.83913	0.00452367	0.112121
ENSG00000142583.17,SLC2A5,protein_coding	531.129	0.92477	1.03579	0.325785	2.83859	0.00453136	0.112155
ENSG00000263004.1,RP11-166P13.3,lincRNA	9.2263	1.17876	1.46634	0.41541	2.83758	0.00454568	0.112406
ENSG00000166006.12,KCNC2,protein_coding	53.2534	-1.56634	-2.89523	0.552188	-2.83661	0.00455955	0.112564
ENSG00000183723.12,CMTM4,protein_coding	1032.51	-0.750376	-0.807985	0.264539	-2.83654	0.00456049	0.112564
ENSG00000164794.8,KCNV1,protein_coding	12.0643	-1.59336	-4.32462	0.562098	-2.83467	0.00458737	0.113123
ENSG00000229440.1,RP5-1033K19.2,processed_pseudogene	6.36087	-1.57607	-2.86437	0.556506	-2.83208	0.00462464	0.113732
ENSG00000274956.2,UG0898H09,lincRNA	1673.81	-1.08029	-1.23134	0.38139	-2.8325	0.00461851	0.113732
ENSG00000139679.15,LPAR6,protein_coding	462.658	0.596886	0.62344	0.21076	2.83206	0.00462485	0.113732
ENSG00000143384.12,MCL1,protein_coding	8561.6	0.60729	0.636316	0.214598	2.82989	0.00465641	0.113823
ENSG00000109654.14,TRIM2,protein_coding	4488.55	-0.67464	-0.709945	0.238287	-2.8312	0.00463735	0.113823
ENSG00000184838.14,PRR16,protein_coding	28.3875	1.15638	1.37024	0.408533	2.83057	0.0046465	0.113823
ENSG00000038945.14,MSR1,protein_coding	819.961	0.812515	0.874896	0.287133	2.82976	0.00465835	0.113823
ENSG00000177943.13,MAMDC4,protein_coding	282.709	0.655991	0.686742	0.231759	2.83048	0.00464783	0.113823
ENSG00000162344.3,FGF19,protein_coding	5.62066	-1.40135	-3.1289	0.495119	-2.83034	0.00464988	0.113823
ENSG00000126353.3,CCR7,protein_coding	6.25907	1.34493	1.65441	0.47501	2.83136	0.004635	0.113823
ENSG00000163006.11,CCDC138,protein_coding	239.772	-0.46993	-0.481357	0.166242	-2.82679	0.00470172	0.114457
ENSG00000163539.16,CLASP2,protein_coding	4214.93	-0.581584	-0.60445	0.20569	-2.82747	0.00469167	0.114457
ENSG00000250568.1,RP11-333E13.2,processed_pseudogene	13.0845	1.12341	1.31978	0.397376	2.82706	0.00469769	0.114457
ENSG00000148082.9,SHC3,protein_coding	1556.08	-0.753054	-0.801376	0.266409	-2.82669	0.00470323	0.114457
ENSG00000167216.16,KATNAL2,protein_coding	157.963	0.59176	0.613628	0.20936	2.82652	0.0047057	0.114457
ENSG00000229391.7,HLA-DRB6,transcribed_unprocessed_pseudogene	43.0138	1.26273	1.63751	0.446861	2.82578	0.00471664	0.114619
ENSG00000120262.9,CCDC170,protein_coding	83.1694	1.18397	1.34579	0.419087	2.82512	0.00472622	0.114747
ENSG00000121552.3,CSTA,protein_coding	19.2116	1.26156	1.52637	0.446896	2.82294	0.00475855	0.115246
ENSG00000243746.1,EEF1A1P10,processed_pseudogene	7.78561	1.10072	1.27288	0.389929	2.82286	0.00475969	0.115246
ENSG00000264515.5,CTC-525D6.1,processed_transcript	8.79612	-1.50573	-2.70332	0.533348	-2.82317	0.00475512	0.115246
ENSG00000030582.16,GRN,protein_coding	903.842	0.875849	0.967485	0.310427	2.82144	0.00478093	0.115655
ENSG00000115594.11,IL1R1,protein_coding	411.426	1.05821	1.19239	0.375191	2.82046	0.00479542	0.115891
ENSG00000150630.3,VEGFC,protein_coding	19.2642	1.07619	1.22769	0.381599	2.8202	0.00479934	0.115891
ENSG00000261098.1,RP11-819C21.1,lincRNA	290.225	-0.635838	-0.665056	0.225495	-2.81974	0.00480623	0.115953
ENSG00000164061.4,BSN,protein_coding	1467.08	-0.788073	-0.849379	0.279539	-2.81919	0.00481454	0.116048
ENSG00000172995.16,ARPP21,protein_coding	351.387	-1.17485	-1.45722	0.417092	-2.81675	0.00485116	0.11672
ENSG00000171631.14,P2RY6,protein_coding	41.5566	0.839164	0.890642	0.297894	2.81699	0.00484761	0.11672
ENSG00000115604.10,IL18R1,protein_coding	21.4059	1.25334	1.55922	0.445006	2.81645	0.00485573	0.116725
ENSG00000067221.13,STOML1,protein_coding	282.383	0.560346	0.578816	0.19899	2.81594	0.00486343	0.116805
ENSG00000280177.1,RP5-906A24.1,TEC	4.04932	1.46449	2.30395	0.52018	2.81535	0.00487247	0.116917
ENSG00000198832.10,SELM,protein_coding	79.6709	0.977043	1.09974	0.347081	2.81503	0.00487726	0.116927
ENSG00000163191.5,S100A11,protein_coding	421.735	0.811808	0.874612	0.288504	2.81385	0.00489523	0.116972
ENSG00000152527.13,PLEKHH2,protein_coding	1412.38	1.15841	1.31101	0.411603	2.81439	0.00488696	0.116972
ENSG00000235903.7,CPB2-AS1,antisense	90.0366	-1.06358	-1.23225	0.377991	-2.81376	0.00489663	0.116972
ENSG00000078142.11,PIK3C3,protein_coding	1952.19	-0.373946	-0.378984	0.132891	-2.81393	0.00489393	0.116972
ENSG00000113638.12,TTC33,protein_coding	206.045	-0.458765	-0.46826	0.163172	-2.81153	0.0049306	0.117469
ENSG00000224981.1,AC000367.1,processed_pseudogene	9.02831	1.42565	2.14208	0.506976	2.81207	0.00492235	0.117469
ENSG00000198894.7,CIPC,protein_coding	1056.38	-0.404984	-0.411168	0.144038	-2.81164	0.00492901	0.117469
ENSG00000214842.5,RAD51AP2,protein_coding	7.5014	1.57715	3.01539	0.561298	2.80982	0.00495694	0.117991
ENSG00000197020.10,ZNF100,protein_coding	647.556	-0.574566	-0.595174	0.204526	-2.80926	0.00496552	0.11809
ENSG00000266111.2,RP11-296K13.4,lincRNA	25.5282	-0.954789	-1.09575	0.340217	-2.80641	0.00500962	0.119033
ENSG00000162777.16,DENND2D,protein_coding	122.158	0.900119	0.975907	0.320992	2.80418	0.00504454	0.11953
ENSG00000198715.11,GLMP,protein_coding	233.527	0.616381	0.641619	0.219874	2.80334	0.00505768	0.11953
ENSG00000053108.16,FSTL4,protein_coding	37.5175	-1.22968	-1.56454	0.43867	-2.80319	0.00505993	0.11953
ENSG00000111850.10,SMIM8,protein_coding	392.441	-0.684561	-0.724298	0.244206	-2.80321	0.00505968	0.11953
ENSG00000224897.6,POT1-AS1,antisense	100.883	-0.868741	-0.958356	0.309945	-2.80289	0.00506472	0.11953
ENSG00000197943.9,PLCG2,protein_coding	231.878	0.825665	0.900022	0.294399	2.80458	0.00503829	0.11953
ENSG00000115266.11,APC2,protein_coding	5863.31	-0.88205	-0.988561	0.314704	-2.80279	0.0050663	0.11953
ENSG00000105136.19,ZNF419,protein_coding	910.606	-0.693685	-0.732688	0.247457	-2.80325	0.00505897	0.11953
ENSG00000106077.18,ABHD11,protein_coding	144.361	0.570464	0.592079	0.203612	2.80172	0.00508303	0.119819
ENSG00000162458.12,FBLIM1,protein_coding	449.122	1.08375	1.28897	0.386975	2.80058	0.00510115	0.119929
ENSG00000205436.7,EXOC3L4,protein_coding	3.11225	1.56268	2.47036	0.557973	2.80063	0.00510027	0.119929
ENSG00000259623.1,RP11-156E6.1,sense_overlapping	488.148	-0.642397	-0.670238	0.229357	-2.80086	0.00509667	0.119929
ENSG00000215788.9,TNFRSF25,protein_coding	269.358	0.732167	0.774702	0.261481	2.80007	0.00510911	0.12001
ENSG00000172197.10,MBOAT1,protein_coding	49.2514	0.968522	1.08815	0.345976	2.79939	0.00511996	0.120071
ENSG00000237621.3,OR9A1P,transcribed_unprocessed_pseudogene	20.9966	-1.24161	-1.53418	0.4436	-2.79894	0.00512703	0.120071
ENSG00000159314.11,ARHGAP27,protein_coding	441.67	0.621174	0.648277	0.221945	2.79878	0.00512965	0.120071
ENSG00000196632.10,WNK3,protein_coding	1112.79	-0.62941	-0.656513	0.224886	-2.7988	0.00512929	0.120071
ENSG00000279917.1,RP11-360N9.2,TEC	125.587	-1.03083	-1.1886	0.368403	-2.79812	0.00514014	0.120106
ENSG00000188227.12,ZNF793,protein_coding	1055.78	-0.69517	-0.736104	0.248426	-2.79829	0.00513734	0.120106
ENSG00000184216.11,IRAK1,protein_coding	1267.74	0.613702	0.639248	0.219365	2.79763	0.00514797	0.120184
ENSG00000241933.1,RP11-755B10.3,lincRNA	6.57956	-1.35504	-1.83651	0.484913	-2.79439	0.00519971	0.1208
ENSG00000165113.12,GKAP1,protein_coding	135.123	-0.602035	-0.626734	0.215417	-2.79474	0.00519409	0.1208
ENSG00000154493.17,C10orf90,protein_coding	166.89	-1.21032	-1.487	0.43314	-2.79428	0.00520146	0.1208
ENSG00000130640.13,TUBGCP2,protein_coding	536.716	0.425978	0.433308	0.152405	2.79504	0.00518933	0.1208
ENSG00000119681.11,LTBP2,protein_coding	752.052	1.09235	1.30446	0.390816	2.79505	0.0051892	0.1208
ENSG00000161149.11,TUBA3FP,transcribed_unprocessed_pseudogene	44.4059	0.904745	0.980731	0.323635	2.79557	0.00518086	0.1208
ENSG00000204219.9,TCEA3,protein_coding	174.201	0.800118	0.862787	0.286536	2.79239	0.00523209	0.121153
ENSG00000120328.6,PCDHB12,protein_coding	712.54	-0.852107	-0.937701	0.305136	-2.79255	0.00522943	0.121153
ENSG00000165156.14,ZHX1,protein_coding	1814.84	-0.431376	-0.438558	0.154523	-2.79166	0.0052439	0.121153
ENSG00000255026.1,RP11-326C3.2,antisense	3.98923	1.54343	2.57457	0.552738	2.79233	0.00523295	0.121153
ENSG00000262664.2,OVCA2,protein_coding	127.891	0.689129	0.727686	0.246835	2.79186	0.00524063	0.121153
ENSG00000096996.15,IL12RB1,protein_coding	20.2054	1.19357	1.44542	0.427518	2.79186	0.00524055	0.121153
ENSG00000157873.17,TNFRSF14,protein_coding	490.887	0.643787	0.666721	0.230698	2.79061	0.00526089	0.121441
ENSG00000136160.14,EDNRB,protein_coding	2648.89	-0.978961	-1.07529	0.350864	-2.79014	0.00526851	0.121512
ENSG00000167286.9,CD3D,protein_coding	3.74557	1.56273	2.74044	0.560405	2.78858	0.00529404	0.121996
ENSG00000143537.13,ADAM15,protein_coding	643.692	0.659813	0.694206	0.236832	2.78599	0.00533644	0.12234
ENSG00000163735.6,CXCL5,protein_coding	31.8626	1.40958	1.86288	0.505738	2.78718	0.00531686	0.12234
ENSG00000123545.5,NDUFAF4,protein_coding	188.081	-0.638225	-0.66646	0.22905	-2.7864	0.00532964	0.12234
ENSG00000049541.10,RFC2,protein_coding	350.566	0.662023	0.698247	0.237608	2.7862	0.00533295	0.12234
ENSG00000205659.10,LIN52,protein_coding	251.485	-0.497003	-0.509481	0.178357	-2.78657	0.00532697	0.12234
ENSG00000188171.15,ZNF626,protein_coding	609.347	-0.534144	-0.550474	0.191662	-2.7869	0.00532143	0.12234
ENSG00000105609.16,LILRB5,protein_coding	47.8053	1.41751	1.93882	0.508852	2.78571	0.0053411	0.122342
ENSG00000115085.13,ZAP70,protein_coding	36.1153	0.906782	0.97717	0.325617	2.78481	0.00535588	0.122366
ENSG00000145147.19,SLIT2,protein_coding	224.762	1.23903	1.53511	0.444881	2.78508	0.00535138	0.122366
ENSG00000146276.11,GABRR1,protein_coding	2.71901	1.5655	3.19736	0.562082	2.78519	0.00534963	0.122366
ENSG00000122122.9,SASH3,protein_coding	170.082	0.884527	0.976638	0.317833	2.78299	0.00538604	0.12295
ENSG00000166503.8,RP11-382A20.3,protein_coding	1617.31	-0.548204	-0.567992	0.197017	-2.78253	0.00539374	0.12302
ENSG00000163694.14,RBM47,protein_coding	369.798	0.774353	0.829362	0.278397	2.78147	0.00541128	0.123315
ENSG00000279192.1,PWAR5,TEC	2206.95	-0.841734	-0.917726	0.302692	-2.78083	0.00542203	0.123455
ENSG00000170293.8,CMTM8,protein_coding	8.82357	1.09312	1.34445	0.393215	2.77995	0.00543674	0.123475
ENSG00000111249.13,CUX2,protein_coding	38.4482	-1.39253	-2.05299	0.500893	-2.7801	0.00543418	0.123475
ENSG00000261371.5,PECAM1,protein_coding	896.48	0.864393	0.949378	0.310927	2.78005	0.00543502	0.123475
ENSG00000183876.8,ARSI,protein_coding	82.8382	1.28974	1.65232	0.46399	2.77967	0.00544144	0.123476
ENSG00000268499.1,CTB-102L5.8,sense_intronic	7.02284	-1.3098	-1.72716	0.47128	-2.77924	0.0054486	0.123534
ENSG00000258983.2,RP11-507K2.2,antisense	2.75281	-1.55404	-2.72358	0.559371	-2.77819	0.00546624	0.123829
ENSG00000178904.18,DPY19L3,protein_coding	2743.61	-0.477071	-0.486065	0.171738	-2.77791	0.00547105	0.123833
ENSG00000237149.5,ZNF503-AS2,antisense	25.6706	1.02985	1.17627	0.370784	2.77749	0.00547801	0.123886
ENSG00000198464.13,ZNF480,protein_coding	586.475	-0.486706	-0.497566	0.175355	-2.77555	0.00551087	0.124523
ENSG00000213368.3,ST13P11,processed_pseudogene	4.31045	1.27265	1.65576	0.458581	2.77519	0.00551692	0.124555
ENSG00000145681.10,HAPLN1,protein_coding	138.856	-1.15748	-1.38078	0.417308	-2.77368	0.00554254	0.125027
ENSG00000184995.7,IFNE,protein_coding	3.07147	1.54469	2.36779	0.557112	2.77268	0.00555969	0.125309
ENSG00000116981.3,NT5C1A,protein_coding	7.69597	-1.47584	-2.59408	0.532507	-2.7715	0.00557995	0.125448
ENSG00000078018.19,MAP2,protein_coding	10629.5	-0.663141	-0.695076	0.239263	-2.7716	0.00557821	0.125448
ENSG00000110721.11,CHKA,protein_coding	815.648	-0.504116	-0.516004	0.18189	-2.77154	0.00557912	0.125448
ENSG00000150625.16,GPM6A,protein_coding	5163.07	-0.791997	-0.85077	0.285852	-2.77065	0.00559441	0.125457
ENSG00000104774.12,MAN2B1,protein_coding	714.723	0.567689	0.589849	0.204883	2.7708	0.00559186	0.125457
ENSG00000186020.12,ZNF529,protein_coding	831.08	-0.534727	-0.548277	0.192969	-2.77106	0.00558745	0.125457
ENSG00000241829.1,RPL21P54,processed_pseudogene	3.76466	1.42721	2.07066	0.515319	2.76958	0.00561294	0.125767
ENSG00000008323.15,PLEKHG6,protein_coding	8.75904	1.45217	1.71693	0.5246	2.76815	0.00563752	0.125901
ENSG00000189152.10,GRAPL,protein_coding	64.2114	0.987197	1.11725	0.356625	2.76817	0.00563726	0.125901
ENSG00000130818.10,ZNF426,protein_coding	1132.27	-0.439869	-0.448491	0.158873	-2.76869	0.00562829	0.125901
ENSG00000267459.1,AC006116.27,transcribed_processed_pseudogene	21.0946	-0.981192	-1.10804	0.35446	-2.76814	0.00563779	0.125901
ENSG00000114395.10,CYB561D2,protein_coding	103.412	0.587589	0.613191	0.212313	2.76756	0.00564781	0.125915
ENSG00000112701.17,SENP6,protein_coding	2298.85	-0.442809	-0.451397	0.159991	-2.76771	0.00564509	0.125915
ENSG00000090020.10,SLC9A1,protein_coding	519.879	0.492419	0.50411	0.177955	2.7671	0.00565579	0.125987
ENSG00000180998.11,GPR137C,protein_coding	396.447	-0.650603	-0.68819	0.235216	-2.76598	0.00567523	0.126315
ENSG00000280332.1,CTD-2013N17.6,TEC	172.842	-0.709394	-0.751984	0.256538	-2.76525	0.00568785	0.126491
ENSG00000170390.15,DCLK2,protein_coding	4057.52	-0.636284	-0.675857	0.230133	-2.76486	0.00569477	0.126539
ENSG00000261302.5,RP11-343H19.1,antisense	5.54795	-1.21996	-1.53222	0.441409	-2.76378	0.00571358	0.126852
ENSG00000109133.12,TMEM33,protein_coding	1958.1	-0.42471	-0.432284	0.153687	-2.76348	0.00571895	0.126866
ENSG00000235907.2,RP4-580O19.2,processed_pseudogene	5.07763	1.40741	2.01328	0.509732	2.76109	0.00576094	0.126889
ENSG00000163568.13,AIM2,protein_coding	23.0852	1.27601	1.62302	0.462069	2.7615	0.00575356	0.126889
ENSG00000162944.10,RFTN2,protein_coding	1029.98	-0.783199	-0.836835	0.283572	-2.7619	0.00574654	0.126889
ENSG00000145685.13,LHFPL2,protein_coding	1669.95	0.612359	0.640675	0.221777	2.76115	0.00575981	0.126889
ENSG00000175606.10,TMEM70,protein_coding	160.894	0.574369	0.597973	0.207919	2.76247	0.00573665	0.126889
ENSG00000278177.1,RP11-632L2.2,antisense	5.86705	1.31976	1.72283	0.477714	2.76267	0.00573315	0.126889
ENSG00000259336.1,RP11-323I15.5,lincRNA	54.3114	-1.07517	-1.26709	0.389416	-2.76099	0.00576273	0.126889
ENSG00000137841.11,PLCB2,protein_coding	606.265	0.824426	0.897356	0.298468	2.76219	0.00574154	0.126889
ENSG00000152229.18,PSTPIP2,protein_coding	90.9474	0.843328	0.920777	0.305349	2.76185	0.00574755	0.126889
ENSG00000095383.19,TBC1D2,protein_coding	154.547	0.769627	0.82128	0.278892	2.75959	0.00578737	0.127327
ENSG00000227308.2,AC009502.4,lincRNA	10.0964	-1.26665	-1.57002	0.459138	-2.75875	0.00580228	0.1275
ENSG00000275074.1,NUDT18,protein_coding	59.776	0.73626	0.783433	0.266895	2.75861	0.00580476	0.1275
ENSG00000173846.12,PLK3,protein_coding	462.916	0.698754	0.738339	0.253418	2.75732	0.0058277	0.127685
ENSG00000163157.14,TMOD4,protein_coding	7.55345	-1.34001	-1.80614	0.486077	-2.75679	0.0058371	0.127685
ENSG00000132681.16,ATP1A4,protein_coding	30.064	-1.30776	-1.72087	0.474351	-2.75696	0.0058342	0.127685
ENSG00000106546.12,AHR,protein_coding	1870.04	1.07834	1.26961	0.391114	2.75709	0.00583192	0.127685
ENSG00000108039.17,XPNPEP1,protein_coding	583.022	0.38087	0.387022	0.138133	2.75727	0.00582871	0.127685
ENSG00000064201.15,TSPAN32,protein_coding	13.3117	1.12875	1.31881	0.409528	2.75622	0.00584733	0.127805
ENSG00000175426.10,PCSK1,protein_coding	358.482	1.20418	1.53111	0.437062	2.75518	0.005866	0.128108
ENSG00000196867.7,ZFP28,protein_coding	506.563	-0.808983	-0.864235	0.293737	-2.75411	0.00588523	0.128423
ENSG00000135116.9,HRK,protein_coding	130.628	-1.12728	-1.3644	0.409414	-2.75339	0.0058982	0.128601
ENSG00000164695.4,CHMP4C,protein_coding	3.43135	1.43665	2.20585	0.522042	2.75198	0.00592363	0.12884
ENSG00000135436.8,FAM186B,protein_coding	24.9942	1.20479	1.37501	0.437749	2.75224	0.00591888	0.12884
ENSG00000196705.8,ZNF431,protein_coding	1955.21	-0.637143	-0.668096	0.231494	-2.75231	0.00591772	0.12884
ENSG00000165970.11,SLC6A5,protein_coding	5.39804	-1.53207	-3.6365	0.556895	-2.75109	0.00593978	0.128981
ENSG00000279344.1,RP11-44F14.7,TEC	65.0429	-0.889386	-0.986527	0.323277	-2.75116	0.00593846	0.128981
ENSG00000267147.2,CTC-548K16.1,lincRNA	2.28923	1.54704	3.02239	0.562683	2.7494	0.00597051	0.129544
ENSG00000128487.16,SPECC1,protein_coding	4498.31	-0.52004	-0.53743	0.189168	-2.7491	0.00597598	0.129557
ENSG00000132676.15,DAP3,protein_coding	602.453	0.355751	0.361943	0.129469	2.74778	0.00600011	0.129945
ENSG00000203710.10,CR1,protein_coding	90.6539	1.4002	1.91864	0.509612	2.74759	0.00600358	0.129945
ENSG00000205707.10,LYRM5,protein_coding	273.814	-0.556645	-0.57281	0.202666	-2.74661	0.00602147	0.130227
ENSG00000204681.10,GABBR1,protein_coding	2760.94	-0.687873	-0.731011	0.250533	-2.74564	0.00603927	0.130265
ENSG00000091136.13,LAMB1,protein_coding	2591.29	0.968656	1.09842	0.352822	2.74545	0.00604276	0.130265
ENSG00000121281.12,ADCY7,protein_coding	655.312	0.673186	0.711495	0.245161	2.7459	0.00603452	0.130265
ENSG00000267194.1,RP1-193H18.2,lincRNA	96.0111	-0.848172	-0.927971	0.308874	-2.74602	0.00603238	0.130265
ENSG00000143110.11,C1orf162,protein_coding	183.445	0.671871	0.706742	0.244755	2.74507	0.00604975	0.130272
ENSG00000162894.11,FCMR,protein_coding	17.7152	1.05378	1.19293	0.383902	2.74491	0.0060528	0.130272
ENSG00000181222.14,POLR2A,protein_coding	2365.04	0.507367	0.522754	0.184862	2.74456	0.00605914	0.130303
ENSG00000011465.16,DCN,protein_coding	927.861	1.16597	1.38285	0.424963	2.74371	0.00607497	0.130369
ENSG00000138623.9,SEMA7A,protein_coding	226.593	0.929314	1.05915	0.338753	2.74334	0.0060817	0.130369
ENSG00000108846.15,ABCC3,protein_coding	2589.2	1.14341	1.38379	0.416767	2.74351	0.00607853	0.130369
ENSG00000160013.8,PTGIR,protein_coding	31.691	1.07714	1.24522	0.392622	2.74346	0.0060795	0.130369
ENSG00000197863.8,ZNF790,protein_coding	347.204	-0.585619	-0.607882	0.213592	-2.74176	0.00611108	0.130894
ENSG00000164161.9,HHIP,protein_coding	315.223	-1.45489	-2.12827	0.530861	-2.74061	0.00613246	0.131036
ENSG00000165457.13,FOLR2,protein_coding	42.5491	1.31252	1.74918	0.478893	2.74073	0.00613021	0.131036
ENSG00000108518.7,PFN1,protein_coding	1485.75	0.596683	0.625587	0.21771	2.74072	0.00613054	0.131036
ENSG00000271551.2,RP11-230C9.2,antisense	45.7803	-0.806943	-0.877183	0.294567	-2.73942	0.00615477	0.131328
ENSG00000169918.9,OTUD7A,protein_coding	279.262	-0.925168	-1.03104	0.337734	-2.73934	0.00615632	0.131328
ENSG00000142185.16,TRPM2,protein_coding	340.357	0.83354	0.907538	0.304312	2.7391	0.00616084	0.131328
ENSG00000169919.16,GUSB,protein_coding	657.05	0.550934	0.570349	0.201181	2.73849	0.00617217	0.131465
ENSG00000280070.1,RP11-907D1.3,TEC	25.1468	-1.23075	-1.59	0.449473	-2.7382	0.00617757	0.131475
ENSG00000254027.1,RP11-363E6.3,antisense	34.095	-1.01829	-1.17989	0.372015	-2.73723	0.00619595	0.131755
ENSG00000090659.17,CD209,protein_coding	61.9673	1.47297	2.43402	0.538172	2.73698	0.00620056	0.131755
ENSG00000196911.9,KPNA5,protein_coding	566.895	-0.617476	-0.641667	0.22566	-2.73631	0.00621323	0.131919
ENSG00000114554.11,PLXNA1,protein_coding	2293.61	0.649712	0.689847	0.237482	2.73583	0.00622223	0.132005
ENSG00000226107.1,AC004383.3,processed_pseudogene	10.358	-1.15152	-1.41398	0.421036	-2.73497	0.00623856	0.132247
ENSG00000128815.17,WDFY4,protein_coding	466.933	0.815363	0.887762	0.298167	2.73458	0.00624597	0.132299
ENSG00000254489.1,RP5-1024C24.1,antisense	2.70584	-1.47707	-2.28652	0.540197	-2.73431	0.00625102	0.132301
ENSG00000047365.11,ARAP2,protein_coding	2373.26	-0.637588	-0.663279	0.23332	-2.73268	0.00628214	0.132854
ENSG00000158555.14,GDPD5,protein_coding	147.786	0.850209	0.923951	0.311174	2.73226	0.00629008	0.132917
ENSG00000087589.16,CASS4,protein_coding	66.3727	0.950202	1.07033	0.347818	2.73189	0.00629715	0.132961
ENSG00000148335.14,NTMT1,protein_coding	167.705	0.588474	0.617842	0.215545	2.73017	0.00633019	0.133448
ENSG00000267100.1,ILF3-AS1,lincRNA	273.253	-0.681898	-0.726287	0.24975	-2.73032	0.00632737	0.133448
ENSG00000197766.7,CFD,protein_coding	20.2352	1.32714	1.69934	0.486227	2.72948	0.00634348	0.133623
ENSG00000230409.3,TCEA1P2,processed_pseudogene	61.5144	0.674928	0.722961	0.247416	2.7279	0.00637383	0.134156
ENSG00000163736.3,PPBP,protein_coding	22.3271	1.4894	2.55663	0.546099	2.72735	0.00638457	0.134277
ENSG00000279141.3,LINC01451,lincRNA	4.95744	1.35796	1.86273	0.49801	2.72677	0.00639575	0.134406
ENSG00000168135.4,KCNJ4,protein_coding	29.0018	-1.38703	-1.90737	0.508732	-2.72645	0.00640204	0.134433
ENSG00000232862.5,RP4-665N4.4,transcribed_processed_pseudogene	5.66114	1.37827	1.77826	0.505873	2.72453	0.00643937	0.134793
ENSG00000272797.1,RP11-368I23.3,lincRNA	19.239	-1.29481	-1.72994	0.475178	-2.7249	0.00643219	0.134793
ENSG00000112339.14,HBS1L,protein_coding	1082.1	-0.445205	-0.453402	0.163391	-2.72479	0.00643428	0.134793
ENSG00000136826.14,KLF4,protein_coding	227.938	0.862565	0.934333	0.316577	2.72466	0.00643679	0.134793
ENSG00000135269.17,TES,protein_coding	95.789	0.964783	1.07498	0.354302	2.72305	0.0064682	0.135079
ENSG00000179593.15,ALOX15B,protein_coding	28.6722	1.4078	2.00563	0.516994	2.72306	0.00646811	0.135079
ENSG00000160460.15,SPTBN4,protein_coding	542.305	-0.732527	-0.77902	0.268996	-2.72319	0.00646548	0.135079
ENSG00000143858.11,SYT2,protein_coding	48.8546	-1.39683	-2.14951	0.51321	-2.72176	0.0064935	0.135185
ENSG00000085662.13,AKR1B1,protein_coding	622.355	0.663534	0.697747	0.24374	2.7223	0.00648292	0.135185
ENSG00000261485.1,PAN3-AS1,antisense	61.1406	-0.611949	-0.643653	0.224803	-2.72216	0.00648571	0.135185
ENSG00000204398.5,RP11-65D24.2,lincRNA	5.19671	-1.51195	-2.98	0.5555	-2.72178	0.00649305	0.135185
ENSG00000135316.17,SYNCRIP,protein_coding	3742.79	-0.43727	-0.445541	0.160705	-2.72095	0.00650948	0.135412
ENSG00000180644.6,PRF1,protein_coding	27.3293	1.36298	1.82884	0.501043	2.72029	0.00652242	0.135576
ENSG00000163162.8,RNF149,protein_coding	593.965	0.667049	0.70087	0.2453	2.71932	0.00654158	0.135763
ENSG00000015171.18,ZMYND11,protein_coding	1175.24	-0.435663	-0.443876	0.160206	-2.7194	0.00654005	0.135763
ENSG00000168743.12,NPNT,protein_coding	1208.51	-1.16337	-1.33431	0.42786	-2.71903	0.00654732	0.135777
ENSG00000227518.3,XXyac-YRM2039.3,antisense	10.1031	-1.27563	-1.70928	0.469239	-2.71851	0.00655772	0.135887
ENSG00000269293.2,ZSCAN16-AS1,antisense	91.8117	-0.571305	-0.593752	0.21038	-2.71559	0.00661587	0.136986
ENSG00000134363.11,FST,protein_coding	63.5448	1.33973	1.85102	0.493465	2.71494	0.00662871	0.137146
ENSG00000271757.1,RP11-111M22.5,lincRNA	17.4264	-1.09817	-1.3494	0.404591	-2.71427	0.00664227	0.13732
ENSG00000187942.11,LDLRAD2,protein_coding	11.9877	1.48631	2.38731	0.547963	2.71243	0.00667923	0.137562
ENSG00000206557.5,TRIM71,protein_coding	132.772	-1.09775	-1.33744	0.404699	-2.7125	0.00667781	0.137562
ENSG00000113088.5,GZMK,protein_coding	3.93801	1.52632	2.95931	0.562737	2.71231	0.0066816	0.137562
ENSG00000124507.10,PACSIN1,protein_coding	76.3391	-1.4061	-2.07245	0.518308	-2.71287	0.00667023	0.137562
ENSG00000185811.16,IKZF1,protein_coding	359.472	0.830384	0.906086	0.306153	2.71232	0.00668143	0.137562
ENSG00000244198.5,RP4-545C24.1,antisense	12.255	1.16928	1.42994	0.431126	2.71215	0.00668486	0.137562
ENSG00000272335.1,RP11-53O19.3,lincRNA	336.614	-0.678165	-0.71163	0.250117	-2.71139	0.00670025	0.137773
ENSG00000124839.12,RAB17,protein_coding	21.0287	0.93883	1.05192	0.34633	2.71079	0.00671223	0.137913
ENSG00000278546.1,RP1-41C23.4,lincRNA	6.01916	1.19662	1.4517	0.44167	2.70932	0.00674219	0.138422
ENSG00000151360.9,ALLC,protein_coding	3.01208	-1.40452	-2.1045	0.518567	-2.70846	0.00675952	0.138565
ENSG00000090339.8,ICAM1,protein_coding	509.396	0.98813	1.1131	0.364824	2.70851	0.00675854	0.138565
ENSG00000138698.14,RAP1GDS1,protein_coding	644.557	-0.438783	-0.44761	0.162088	-2.70707	0.00678804	0.138944
ENSG00000198040.10,ZNF84,protein_coding	2366.23	-0.421987	-0.431179	0.155885	-2.70705	0.00678841	0.138944
ENSG00000144057.15,ST6GAL2,protein_coding	514.18	-1.20039	-1.53574	0.443542	-2.70638	0.00680212	0.139118
ENSG00000116771.5,AGMAT,protein_coding	17.994	0.98882	1.15826	0.365484	2.70551	0.00681994	0.13914
ENSG00000115523.16,GNLY,protein_coding	34.186	1.09259	1.28176	0.403906	2.70507	0.0068291	0.13914
ENSG00000074966.10,TXK,protein_coding	11.6507	1.16784	1.3914	0.431608	2.70579	0.00681423	0.13914
ENSG00000135063.17,FAM189A2,protein_coding	454.399	-1.20309	-1.62269	0.444755	-2.70506	0.00682923	0.13914
ENSG00000198300.12,PEG3,protein_coding	2048.12	-0.844717	-0.947199	0.312162	-2.70602	0.00680943	0.13914
ENSG00000243414.5,TICAM2,protein_coding	145.773	0.889924	0.9941	0.329077	2.7043	0.00684477	0.139351
ENSG00000138709.17,LARP1B,protein_coding	629.639	-0.503638	-0.518457	0.186329	-2.70295	0.00687272	0.139611
ENSG00000111860.13,CEP85L,protein_coding	1178.4	-0.516305	-0.530467	0.191017	-2.70293	0.00687321	0.139611
ENSG00000196329.11,GIMAP5,protein_coding	149.733	0.853707	0.935758	0.315821	2.70314	0.00686886	0.139611
ENSG00000106211.8,HSPB1,protein_coding	829.076	0.811473	0.879034	0.300266	2.70251	0.00688173	0.139678
ENSG00000185798.7,WDR53,protein_coding	86.1138	0.632366	0.665453	0.234057	2.70176	0.00689732	0.139888
ENSG00000211959.2,IGHV4-39,IG_V_gene	17.6678	1.4906	2.8798	0.551832	2.70118	0.00690943	0.139921
ENSG00000187116.13,LILRA5,protein_coding	4.28906	1.36168	1.82477	0.504091	2.70126	0.0069078	0.139921
ENSG00000154589.6,LY96,protein_coding	32.9922	0.994592	1.13954	0.368305	2.70046	0.00692443	0.139998
ENSG00000254873.1,RP11-770J1.5,antisense	3.42356	-1.50394	-2.8406	0.556866	-2.70072	0.00691904	0.139998
ENSG00000150394.13,CDH8,protein_coding	122.943	-1.34604	-1.9052	0.498488	-2.70024	0.00692895	0.139998
ENSG00000163359.15,COL6A3,protein_coding	2499.47	1.30867	1.57364	0.48487	2.699	0.00695476	0.140176
ENSG00000065485.17,PDIA5,protein_coding	165.523	0.684648	0.722996	0.253684	2.69882	0.00695848	0.140176
ENSG00000257335.8,MGAM,protein_coding	137.293	-1.14654	-1.38256	0.424831	-2.69882	0.0069585	0.140176
ENSG00000219435.4,TEX40,protein_coding	3.39574	-1.51656	-2.89567	0.561937	-2.69881	0.00695871	0.140176
ENSG00000280184.1,AL023806.1,protein_coding	64.5615	-0.802781	-0.865281	0.297557	-2.69791	0.00697766	0.140452
ENSG00000172733.11,PURG,protein_coding	326.032	-0.676909	-0.715139	0.25097	-2.69717	0.00699317	0.140636
ENSG00000069399.12,BCL3,protein_coding	224.847	0.79617	0.858145	0.295209	2.69697	0.00699733	0.140636
ENSG00000107862.4,GBF1,protein_coding	1113.24	0.365641	0.370548	0.135617	2.69613	0.00701509	0.140887
ENSG00000274712.1,RP11-147L13.15,lincRNA	364.409	-0.747868	-0.819706	0.277462	-2.69539	0.00703068	0.141094
ENSG00000197372.9,ZNF675,protein_coding	424.562	-0.500313	-0.515776	0.185646	-2.69499	0.00703904	0.141156
ENSG00000179454.13,KLHL28,protein_coding	586.265	-0.470968	-0.481714	0.174784	-2.69458	0.00704775	0.141224
ENSG00000120675.5,DNAJC15,protein_coding	611.437	-0.641002	-0.668786	0.23795	-2.69385	0.0070631	0.141426
ENSG00000240457.3,RN7SL472P,misc_RNA	12.6234	1.42679	2.10729	0.529818	2.69298	0.00708169	0.141692
ENSG00000185156.5,MFSD6L,protein_coding	5.2785	1.36051	1.85573	0.505381	2.69205	0.00710137	0.14198
ENSG00000165891.15,E2F7,protein_coding	374.47	0.909456	1.00852	0.337927	2.69128	0.00711787	0.142097
ENSG00000225331.1,AP001055.6,lincRNA	7.1915	1.26057	1.56491	0.468384	2.69132	0.00711694	0.142097
ENSG00000007402.11,CACNA2D2,protein_coding	53.6258	-0.893904	-1.01802	0.332297	-2.69007	0.00714363	0.142355
ENSG00000268223.3,ARL14EPL,protein_coding	2.24828	1.51392	3.65055	0.562738	2.69027	0.00713948	0.142355
ENSG00000104321.10,TRPA1,protein_coding	2.6306	-1.51046	-3.10908	0.561524	-2.68993	0.00714677	0.142355
ENSG00000174373.15,RALGAPA1,protein_coding	2181.72	-0.321274	-0.32513	0.119448	-2.68966	0.00715249	0.142363
ENSG00000186635.14,ARAP1,protein_coding	1322.92	0.510176	0.526051	0.189701	2.68936	0.00715886	0.142383
ENSG00000272181.1,RP11-245J9.6,antisense	3.84966	-1.39095	-2.15111	0.517255	-2.68911	0.00716436	0.142387
ENSG00000163564.14,PYHIN1,protein_coding	7.59178	1.42114	2.19054	0.528745	2.68776	0.00719339	0.142758
ENSG00000254827.5,SLC22A18AS,protein_coding	2.93793	1.37703	1.87425	0.512385	2.68749	0.00719905	0.142758
ENSG00000156738.17,MS4A1,protein_coding	6.85405	1.36816	1.76849	0.509056	2.68763	0.00719604	0.142758
ENSG00000137288.9,UQCC2,protein_coding	494.809	-0.413954	-0.42189	0.154119	-2.68594	0.0072325	0.143237
ENSG00000067715.13,SYT1,protein_coding	372.168	-1.34502	-1.88297	0.500812	-2.68569	0.00723806	0.143237
ENSG00000246731.2,MGC16275,antisense	103.637	-0.988288	-1.14572	0.367991	-2.68563	0.00723926	0.143237
ENSG00000171860.4,C3AR1,protein_coding	207.476	0.981331	1.13529	0.365438	2.68536	0.00724522	0.143248
ENSG00000151835.13,SACS,protein_coding	6322.69	-0.610743	-0.626988	0.227516	-2.6844	0.00726609	0.143343
ENSG00000169594.12,BNC1,protein_coding	3.05273	1.50956	2.93884	0.562271	2.68475	0.00725839	0.143343
ENSG00000157551.17,KCNJ15,protein_coding	13.4575	1.3304	1.93302	0.495568	2.68459	0.00726186	0.143343
ENSG00000263878.1,DLGAP1-AS4,antisense	2.86131	-1.49606	-3.84372	0.557406	-2.68397	0.0072753	0.143419
ENSG00000250771.2,RP11-153M7.3,transcribed_unprocessed_pseudogene	42.9401	1.01762	1.17762	0.379257	2.68318	0.00729251	0.143652
ENSG00000160401.14,CFAP157,protein_coding	114.712	1.44631	1.57781	0.539229	2.68218	0.00731452	0.143735
ENSG00000265840.1,AC010761.10,antisense	2.20883	-1.45575	-2.41468	0.542665	-2.68259	0.00730539	0.143735
ENSG00000006638.11,TBXA2R,protein_coding	44.0767	0.863507	0.949737	0.321963	2.68201	0.00731824	0.143735
ENSG00000185686.17,PRAME,protein_coding	12.3622	1.39177	4.82834	0.518903	2.68214	0.00731521	0.143735
ENSG00000151247.12,EIF4E,protein_coding	1135.06	-0.381202	-0.387119	0.142199	-2.68077	0.00734521	0.143958
ENSG00000110436.11,SLC1A2,protein_coding	13164.7	-1.12048	-1.33009	0.418002	-2.68055	0.00735009	0.143958
ENSG00000111348.8,ARHGDIB,protein_coding	664.977	0.707058	0.755122	0.263778	2.6805	0.00735113	0.143958
ENSG00000140263.13,SORD,protein_coding	319.79	-0.573824	-0.597622	0.214024	-2.68112	0.00733762	0.143958
ENSG00000082074.15,FYB,protein_coding	776.907	0.858955	0.946956	0.320514	2.67993	0.00736377	0.1441
ENSG00000152954.11,NRSN1,protein_coding	145.933	-1.14693	-1.42429	0.428279	-2.678	0.00740639	0.144722
ENSG00000123575.8,FAM199X,protein_coding	1906.04	-0.537713	-0.55382	0.200787	-2.67803	0.00740563	0.144722
ENSG00000269793.5,ZIM2-AS1,antisense	62.9115	-0.9554	-1.09218	0.356799	-2.6777	0.00741303	0.144746
ENSG00000151136.14,BTBD11,protein_coding	154.516	1.18481	1.50224	0.442553	2.67722	0.00742357	0.144846
ENSG00000227640.2,SOX21-AS1,lincRNA	249.174	-0.686904	-0.726542	0.25672	-2.6757	0.00745739	0.145083
ENSG00000172006.11,ZNF554,protein_coding	194.176	-0.442484	-0.455994	0.165341	-2.67618	0.00744655	0.145083
ENSG00000181143.15,MUC16,protein_coding	8.65958	1.37306	2.19529	0.513134	2.67584	0.00745432	0.145083
ENSG00000188321.13,ZNF559,protein_coding	1307.26	-0.638081	-0.670683	0.238413	-2.67637	0.00744241	0.145083
ENSG00000127249.14,ATP13A4,protein_coding	1373.19	-0.849072	-0.919669	0.317427	-2.67486	0.00747604	0.145285
ENSG00000139880.19,CDH24,protein_coding	342.061	0.781026	0.840334	0.292	2.67474	0.00747866	0.145285
ENSG00000272888.5,LINC01578,processed_transcript	2232.95	-0.558954	-0.578417	0.20903	-2.67404	0.00749433	0.145484
ENSG00000240563.1,L1TD1,protein_coding	5.35749	-1.38664	-2.01355	0.518974	-2.67188	0.00754275	0.145883
ENSG00000146192.14,FGD2,protein_coding	434.371	0.941347	1.06332	0.35247	2.67072	0.00756892	0.145883
ENSG00000280913.2,CTSLP2,transcribed_unprocessed_pseudogene	4.62505	1.50265	3.33407	0.562344	2.67213	0.0075372	0.145883
ENSG00000234026.1,RP11-310E22.4,antisense	10.018	1.42631	2.13541	0.533946	2.67126	0.00755666	0.145883
ENSG00000183715.13,OPCML,protein_coding	537.367	-1.16857	-1.47966	0.437239	-2.67261	0.00752631	0.145883
ENSG00000260664.2,AC004158.3,lincRNA	529.282	-0.828531	-0.909814	0.310086	-2.67194	0.00754145	0.145883
ENSG00000260896.5,PRCAT47,lincRNA	8.32498	-1.04193	-1.18772	0.390133	-2.67069	0.00756949	0.145883
ENSG00000075399.12,VPS9D1,protein_coding	415.965	0.502366	0.51663	0.188022	2.67184	0.00754366	0.145883
ENSG00000074660.15,SCARF1,protein_coding	189.963	0.771749	0.826834	0.288911	2.67123	0.00755735	0.145883
ENSG00000078687.16,TNRC6C,protein_coding	1715.27	-0.409633	-0.419779	0.153371	-2.67086	0.00756567	0.145883
ENSG00000205403.12,CFI,protein_coding	792.451	1.04759	1.21591	0.392616	2.66824	0.007625	0.146429
ENSG00000006128.11,TAC1,protein_coding	7.93772	-1.49773	-3.28663	0.561212	-2.66874	0.00761371	0.146429
ENSG00000165688.11,PMPCA,protein_coding	467.405	0.449102	0.462223	0.16826	2.6691	0.00760545	0.146429
ENSG00000172987.12,HPSE2,protein_coding	17.7964	-1.49303	-3.08308	0.559556	-2.66824	0.00762492	0.146429
ENSG00000118160.13,SLC8A2,protein_coding	69.726	-1.29627	-1.79036	0.485816	-2.66823	0.0076252	0.146429
ENSG00000178226.10,PRSS36,protein_coding	13.9424	1.13919	1.37988	0.42712	2.66715	0.00764986	0.146797
ENSG00000105352.10,CEACAM4,protein_coding	6.35063	1.43841	2.26386	0.539573	2.66583	0.00767981	0.147266
ENSG00000173083.14,HPSE,protein_coding	125.886	0.910133	1.04325	0.34146	2.66541	0.00768938	0.147344
ENSG00000087086.13,FTL,protein_coding	10288.9	0.821478	0.893957	0.308316	2.66441	0.00771246	0.14768
ENSG00000213355.3,CNN2P8,processed_pseudogene	14.5946	-1.49959	-3.29579	0.562897	-2.66406	0.00772029	0.147724
ENSG00000233646.1,OR52T1P,unprocessed_pseudogene	12.0875	-1.13637	-1.36151	0.426799	-2.66253	0.00775549	0.148292
ENSG00000206195.10,DUXAP8,processed_transcript	335.765	1.04206	1.16008	0.391467	2.66194	0.00776917	0.148447
ENSG00000268713.1,CTC-444N24.8,lincRNA	116.541	-0.596871	-0.623444	0.22426	-2.66152	0.0077789	0.148527
ENSG00000157985.18,AGAP1,protein_coding	2435.05	-0.469139	-0.482003	0.176327	-2.66062	0.00779979	0.14882
ENSG00000182103.4,FAM181B,protein_coding	1103.41	-0.883103	-0.983977	0.332058	-2.65948	0.00782608	0.149013
ENSG00000135678.11,CPM,protein_coding	1091.64	1.09768	1.306	0.412746	2.65946	0.00782665	0.149013
ENSG00000166704.11,ZNF606,protein_coding	1124.22	-0.517273	-0.533323	0.194478	-2.65981	0.00781852	0.149013
ENSG00000130560.8,UBAC1,protein_coding	324.408	0.402705	0.411185	0.151469	2.65866	0.00784512	0.149258
ENSG00000272663.1,RP11-191L17.1,lincRNA	11.4007	-1.33779	-1.86855	0.503296	-2.65807	0.00785905	0.149417
ENSG00000135218.17,CD36,protein_coding	86.7138	1.02674	1.18565	0.38642	2.65707	0.00788228	0.149752
ENSG00000237541.3,HLA-DQA2,protein_coding	48.3095	1.367	1.98465	0.514626	2.6563	0.00790034	0.149842
ENSG00000020181.17,ADGRA2,protein_coding	446.474	0.88521	0.974924	0.333246	2.65633	0.00789974	0.149842
ENSG00000198947.15,DMD,protein_coding	2179.39	-0.951901	-1.06197	0.358376	-2.65615	0.00790381	0.149842
ENSG00000115598.9,IL1RL2,protein_coding	4.24533	1.39878	1.93125	0.526848	2.65499	0.00793109	0.149933
ENSG00000145439.11,CBR4,protein_coding	840.107	-0.456517	-0.471499	0.171913	-2.65552	0.00791871	0.149933
ENSG00000214269.3,LGMNP1,processed_pseudogene	2.16845	1.41231	2.00902	0.531938	2.65503	0.00793014	0.149933
ENSG00000185269.11,NOTUM,protein_coding	4.83543	-1.43383	-2.46066	0.540014	-2.65518	0.00792669	0.149933
ENSG00000163378.13,EOGT,protein_coding	395.422	0.454031	0.46584	0.171062	2.65419	0.00794997	0.150184
ENSG00000167186.10,COQ7,protein_coding	393.682	-0.39234	-0.400614	0.147835	-2.65391	0.00795655	0.150202
ENSG00000239263.1,RBM43P1,processed_pseudogene	14.734	1.13061	1.37644	0.426152	2.65307	0.0079763	0.150363
ENSG00000130477.14,UNC13A,protein_coding	1099.6	-1.01069	-1.18694	0.380936	-2.65318	0.00797374	0.150363
ENSG00000146414.15,SHPRH,protein_coding	2018.03	-0.514866	-0.531381	0.194102	-2.65256	0.00798842	0.150485
ENSG00000271743.1,CTD-2541M15.3,lincRNA	30.3321	-0.980013	-1.1348	0.369694	-2.65088	0.00802835	0.150706
ENSG00000119333.11,WDR34,protein_coding	368.991	0.831258	0.911339	0.313531	2.65128	0.00801868	0.150706
ENSG00000172243.17,CLEC7A,protein_coding	404.679	0.853035	0.940963	0.321788	2.65092	0.00802719	0.150706
ENSG00000122042.9,UBL3,protein_coding	1464.57	-0.590703	-0.613662	0.222822	-2.65101	0.00802504	0.150706
ENSG00000136451.8,VEZF1,protein_coding	1714.13	-0.382284	-0.387924	0.144197	-2.65112	0.00802261	0.150706
ENSG00000249428.6,CFAP99,protein_coding	2.56953	1.48259	2.93004	0.559541	2.64965	0.00805756	0.151052
ENSG00000251396.6,LINC01301,lincRNA	50.7547	-0.731445	-0.785009	0.276062	-2.64957	0.00805949	0.151052
ENSG00000185885.15,IFITM1,protein_coding	157.883	1.06272	1.29305	0.40112	2.64939	0.00806372	0.151052
ENSG00000279007.1,AL136097.1,protein_coding	3.90548	-1.40309	-2.18568	0.529734	-2.64867	0.00808083	0.151203
ENSG00000185168.5,LINC00482,lincRNA	4.40511	1.34736	2.0313	0.50871	2.64858	0.0080831	0.151203
ENSG00000178726.6,THBD,protein_coding	186.094	1.02061	1.16323	0.38539	2.64826	0.00809074	0.15124
ENSG00000139567.12,ACVRL1,protein_coding	200.392	0.770574	0.834154	0.291078	2.64731	0.00811348	0.151454
ENSG00000067177.14,PHKA1,protein_coding	589.368	-0.709496	-0.751365	0.267989	-2.64749	0.00810927	0.151454
ENSG00000137265.14,IRF4,protein_coding	20.064	1.14752	1.37771	0.433531	2.64692	0.00812283	0.151522
ENSG00000009790.14,TRAF3IP3,protein_coding	84.0891	0.909072	1.02132	0.343543	2.64617	0.00814097	0.151649
ENSG00000198740.8,ZNF652,protein_coding	1738.47	-0.366734	-0.371769	0.138589	-2.6462	0.00814018	0.151649
ENSG00000245648.1,RP11-277P12.20,antisense	81.5697	-1.31374	-1.61825	0.496542	-2.64579	0.00815016	0.151714
ENSG00000245729.2,RP11-480D4.1,lincRNA	23.7076	-1.1557	-1.43231	0.437092	-2.64408	0.00819145	0.15204
ENSG00000156675.15,RAB11FIP1,protein_coding	113.047	0.868289	0.955417	0.328356	2.64435	0.00818473	0.15204
ENSG00000139192.11,TAPBPL,protein_coding	165.644	0.608097	0.635909	0.230001	2.64388	0.0081961	0.15204
ENSG00000268388.5,FENDRR,lincRNA	86.4286	1.37356	1.8698	0.519431	2.64436	0.00818449	0.15204
ENSG00000278012.1,RP1-310O13.13,sense_intronic	5.42778	-1.45509	-3.08881	0.55034	-2.64399	0.00819359	0.15204
ENSG00000118785.13,SPP1,protein_coding	9274.92	0.95436	1.15164	0.361141	2.64262	0.00822667	0.152362
ENSG00000256325.1,RP11-611O2.1,antisense	12.9934	1.28798	1.56646	0.487415	2.64246	0.00823054	0.152362
ENSG00000253797.2,UTP14C,protein_coding	880.251	-0.470005	-0.48211	0.17785	-2.6427	0.00822476	0.152362
ENSG00000158747.13,NBL1,protein_coding	271.163	0.883233	0.967548	0.334443	2.64091	0.00826842	0.152373
ENSG00000119535.17,CSF3R,protein_coding	505.836	0.902096	1.01085	0.341619	2.64065	0.00827471	0.152373
ENSG00000162889.10,MAPKAPK2,protein_coding	881.781	0.41317	0.42197	0.156405	2.64167	0.00824985	0.152373
ENSG00000119777.18,TMEM214,protein_coding	674.386	0.433024	0.443116	0.163939	2.64138	0.008257	0.152373
ENSG00000178562.17,CD28,protein_coding	29.7597	1.11245	1.30321	0.421305	2.64048	0.0082789	0.152373
ENSG00000051382.8,PIK3CB,protein_coding	853.414	-0.288093	-0.290426	0.109055	-2.64171	0.00824887	0.152373
ENSG00000164691.16,TAGAP,protein_coding	119.337	0.817559	0.910817	0.309642	2.64033	0.00828242	0.152373
ENSG00000280057.1,RP1-168L15.6,TEC	33.2153	-0.970794	-1.13674	0.367589	-2.64097	0.0082668	0.152373
ENSG00000119913.4,TECTB,protein_coding	2.43108	-1.48573	-2.6013	0.562487	-2.64137	0.00825723	0.152373
ENSG00000267784.1,RP11-171I2.1,antisense	29.6966	-1.29719	-1.79624	0.49142	-2.63967	0.00829866	0.152462
ENSG00000186716.19,BCR,protein_coding	1280.04	-0.616083	-0.643492	0.233394	-2.63967	0.00829869	0.152462
ENSG00000125510.15,OPRL1,protein_coding	61.1575	0.674154	0.719107	0.255494	2.63863	0.00832419	0.152826
ENSG00000182022.17,CHST15,protein_coding	899.92	0.712662	0.752839	0.270159	2.63794	0.00834115	0.153032
ENSG00000213760.10,ATP6V1G2,protein_coding	244.268	-0.91042	-1.02118	0.345201	-2.63736	0.00835536	0.153187
ENSG00000103569.9,AQP9,protein_coding	64.2205	1.3471	1.93315	0.51087	2.63688	0.00836724	0.153195
ENSG00000131055.4,COX4I2,protein_coding	5.35802	1.30935	1.80392	0.496529	2.637	0.00836421	0.153195
ENSG00000197584.11,KCNMB2,protein_coding	38.8954	-1.16406	-1.47045	0.441581	-2.63612	0.00838589	0.153282
ENSG00000137414.5,FAM8A1,protein_coding	1012.15	-0.460219	-0.469143	0.174573	-2.63625	0.00838277	0.153282
ENSG00000268262.1,CTC-246B18.8,sense_overlapping	12.7625	-1.02986	-1.20774	0.390693	-2.63599	0.00838917	0.153282
ENSG00000099725.14,PRKY,transcribed_unprocessed_pseudogene	210.527	1.22395	0.994038	0.464372	2.63572	0.008396	0.153301
ENSG00000258082.1,RP11-443B7.3,lincRNA	3.95863	1.37422	2.33143	0.521819	2.63351	0.00845062	0.153565
ENSG00000150938.9,CRIM1,protein_coding	1344.11	0.781193	0.855877	0.296559	2.63419	0.00843374	0.153565
ENSG00000106526.10,ACTR3C,protein_coding	52.8898	1.20402	1.47401	0.45716	2.63369	0.00844615	0.153565
ENSG00000235884.3,LINC00941,lincRNA	74.0296	1.33494	1.82248	0.506659	2.6348	0.00841874	0.153565
ENSG00000103888.15,CEMIP,protein_coding	652.752	1.14981	1.39873	0.436601	2.63355	0.00844975	0.153565
ENSG00000153879.8,CEBPG,protein_coding	1131.81	-0.486247	-0.498868	0.184622	-2.63375	0.00844483	0.153565
ENSG00000105281.12,SLC1A5,protein_coding	234.378	0.717497	0.77923	0.272416	2.63383	0.0084429	0.153565
ENSG00000198055.10,GRK6,protein_coding	239.303	0.505885	0.521365	0.19212	2.63317	0.0084591	0.153614
ENSG00000092096.14,SLC22A17,protein_coding	1298.1	-0.60082	-0.633914	0.228226	-2.63256	0.00847433	0.153682
ENSG00000125814.17,NAPB,protein_coding	863.805	-0.727119	-0.780571	0.276196	-2.63262	0.00847285	0.153682
ENSG00000169442.8,CD52,protein_coding	11.5036	1.36434	1.91474	0.518342	2.63212	0.00848551	0.153701
ENSG00000037280.15,FLT4,protein_coding	237.961	0.891413	0.990327	0.338744	2.63152	0.00850027	0.153701
ENSG00000183166.10,CALN1,protein_coding	128.237	-1.28118	-1.7595	0.48685	-2.63158	0.00849895	0.153701
ENSG00000271063.1,SNRPGP17,processed_pseudogene	6.46922	-1.42259	-2.54325	0.540601	-2.6315	0.00850087	0.153701
ENSG00000266549.1,RP11-526I8.2,processed_pseudogene	6.05829	-1.45566	-2.8463	0.553193	-2.63137	0.00850413	0.153701
ENSG00000143320.8,CRABP2,protein_coding	63.4717	0.974155	1.12236	0.370264	2.63098	0.008514	0.15373
ENSG00000163923.9,RPL39L,protein_coding	30.8468	1.24215	1.58893	0.472147	2.63085	0.00851722	0.15373
ENSG00000271225.1,BNIP3P4,processed_pseudogene	9.14281	1.407	5.39132	0.535028	2.62977	0.00854427	0.154114
ENSG00000279712.1,CTA-280A3.2,lincRNA	9.72284	-1.45522	-2.65936	0.553512	-2.62907	0.00856178	0.154326
ENSG00000197961.11,ZNF121,protein_coding	2593.57	-0.509936	-0.527003	0.194005	-2.62847	0.00857691	0.154494
ENSG00000120156.20,TEK,protein_coding	160.543	-1.10425	-1.29323	0.420219	-2.62778	0.00859428	0.154581
ENSG00000233930.3,KRTAP5-AS1,antisense	29.7276	-1.12631	-1.40785	0.428613	-2.6278	0.00859385	0.154581
ENSG00000168813.16,ZNF507,protein_coding	1672.15	-0.433633	-0.443231	0.16503	-2.6276	0.00859906	0.154581
ENSG00000152620.12,NADK2,protein_coding	1078.48	-0.494872	-0.505008	0.188429	-2.62631	0.00863174	0.155064
ENSG00000272106.1,RP11-345P4.9,antisense	237.351	-0.541461	-0.564671	0.206201	-2.62589	0.00864227	0.155065
ENSG00000280276.1,RP11-314C9.1,TEC	2.26929	1.47052	2.6144	0.560016	2.62585	0.00864338	0.155065
ENSG00000227454.2,MTND4P30,unprocessed_pseudogene	3.49104	-1.40976	-2.3617	0.537111	-2.62472	0.00867209	0.155072
ENSG00000164118.12,CEP44,protein_coding	438.542	-0.392779	-0.40198	0.149631	-2.62499	0.00866526	0.155072
ENSG00000219023.1,RP3-340B19.2,processed_pseudogene	6.81306	1.47478	2.13385	0.561923	2.62453	0.00867695	0.155072
ENSG00000122545.18,SEPT7,protein_coding	6293.83	-0.487737	-0.499021	0.185843	-2.62446	0.00867861	0.155072
ENSG00000165511.6,C10orf25,antisense	41.2204	-0.780668	-0.847836	0.297402	-2.62495	0.00866605	0.155072
ENSG00000165443.11,PHYHIPL,protein_coding	1017.85	-0.930644	-1.05796	0.354481	-2.62537	0.00865551	0.155072
ENSG00000013288.8,MAN2B2,protein_coding	714.885	0.454905	0.46776	0.173421	2.62313	0.00871252	0.155227
ENSG00000021355.12,SERPINB1,protein_coding	236.571	0.79948	0.873821	0.304764	2.62328	0.00870881	0.155227
ENSG00000147416.10,ATP6V1B2,protein_coding	1976.55	0.433309	0.446972	0.165197	2.62299	0.00871631	0.155227
ENSG00000159069.13,FBXW5,protein_coding	554.328	0.628711	0.66407	0.239678	2.62314	0.00871225	0.155227
ENSG00000132613.14,MTSS1L,protein_coding	4255.66	-0.595205	-0.621636	0.226908	-2.62312	0.00871297	0.155227
ENSG00000197905.8,TEAD4,protein_coding	80.0357	0.918105	1.02528	0.350093	2.62246	0.00872969	0.15532
ENSG00000160392.13,C19orf47,protein_coding	300.548	-0.464898	-0.478406	0.177285	-2.62233	0.00873316	0.15532
ENSG00000092140.14,G2E3,protein_coding	639.909	-0.487724	-0.501244	0.186045	-2.62153	0.00875355	0.155579
ENSG00000281831.1,HCP5B,lincRNA	26.5137	-1.14927	-1.39535	0.438499	-2.62092	0.00876919	0.15565
ENSG00000272047.1,GTF2H5,protein_coding	338.103	-0.540259	-0.556472	0.206123	-2.62105	0.00876586	0.15565
ENSG00000119655.8,NPC2,protein_coding	548.433	0.705436	0.756218	0.269179	2.62069	0.00877512	0.155652
ENSG00000140153.17,WDR20,protein_coding	513.079	-0.348094	-0.353395	0.132856	-2.62009	0.00879074	0.155826
ENSG00000240031.1,OR9A3P,transcribed_unprocessed_pseudogene	24.1339	-1.18141	-1.4834	0.450994	-2.61957	0.00880406	0.155958
ENSG00000122574.10,WIPF3,protein_coding	332.127	-1.16076	-1.45477	0.443201	-2.61903	0.0088181	0.156104
ENSG00000169071.14,ROR2,protein_coding	42.387	1.19858	1.41856	0.457752	2.61841	0.00883415	0.156284
ENSG00000188522.14,FAM83G,protein_coding	64.5333	1.21076	1.52738	0.462591	2.61735	0.00886141	0.156663
ENSG00000268471.4,DKFZP434I0714,lincRNA	284.679	-0.544313	-0.568744	0.208138	-2.61515	0.00891875	0.157476
ENSG00000158467.16,AHCYL2,protein_coding	1954.01	-0.633939	-0.662525	0.242411	-2.61514	0.0089192	0.157476
ENSG00000211943.2,IGHV3-15,IG_V_gene	5.12129	1.46103	3.49724	0.558773	2.61471	0.00893039	0.15757
ENSG00000084652.15,TXLNA,protein_coding	1804.34	0.423889	0.433243	0.16223	2.61289	0.00897808	0.157587
ENSG00000231842.1,RP11-527F13.1,lincRNA	10.3108	-1.284	-1.75428	0.49124	-2.61379	0.00895447	0.157587
ENSG00000129480.12,DTD2,protein_coding	336.601	-0.364303	-0.369643	0.139422	-2.61295	0.00897649	0.157587
ENSG00000242163.1,RP11-299L17.1,processed_pseudogene	7.5758	-1.1282	-1.3668	0.431606	-2.61396	0.00894999	0.157587
ENSG00000105131.7,EPHX3,protein_coding	9.63358	1.21178	1.50618	0.46376	2.61295	0.00897646	0.157587
ENSG00000269473.1,CTD-2619J13.19,lincRNA	52.035	-0.722388	-0.776056	0.276376	-2.61379	0.00895436	0.157587
ENSG00000244558.5,KCNK15-AS1,antisense	4.19626	-1.40385	-2.4549	0.537117	-2.61368	0.00895719	0.157587
ENSG00000226241.2,LL0XNC01-221F2.2,processed_pseudogene	5.85016	-1.24874	-1.67463	0.477918	-2.61287	0.00897852	0.157587
ENSG00000138039.14,LHCGR,protein_coding	6.51576	1.46047	2.60869	0.55923	2.61157	0.00901287	0.157953
ENSG00000066084.12,DIP2B,protein_coding	2544.53	-0.358346	-0.362886	0.137224	-2.6114	0.0090171	0.157953
ENSG00000238121.5,LINC00426,lincRNA	7.44115	1.31233	1.71029	0.502464	2.61178	0.00900716	0.157953
ENSG00000251503.8,APITD1-CORT,protein_coding	9.7006	1.25445	1.79143	0.480559	2.61039	0.00904383	0.158258
ENSG00000233967.6,RP11-250B2.3,lincRNA	27.8367	-0.986182	-1.11347	0.377809	-2.61026	0.00904721	0.158258
ENSG00000212993.4,POU5F1B,protein_coding	20.6241	-1.02039	-1.22659	0.390944	-2.61007	0.00905225	0.158258
ENSG00000139180.10,NDUFA9,protein_coding	915.497	-0.418416	-0.426749	0.160369	-2.60908	0.00907847	0.158509
ENSG00000100979.14,PLTP,protein_coding	1463.87	0.891402	0.983043	0.341642	2.60917	0.0090761	0.158509
ENSG00000057252.12,SOAT1,protein_coding	942.844	0.450863	0.465197	0.172868	2.60814	0.00910367	0.158628
ENSG00000166275.15,BORCS7,protein_coding	193.147	-0.540939	-0.558908	0.207436	-2.60774	0.00911427	0.158628
ENSG00000129009.12,ISLR,protein_coding	178.851	1.28157	1.61363	0.491406	2.60797	0.00910797	0.158628
ENSG00000186272.12,ZNF17,protein_coding	530.696	-0.52058	-0.538068	0.199631	-2.60771	0.00911496	0.158628
ENSG00000077264.14,PAK3,protein_coding	813.428	-1.03927	-1.25242	0.398495	-2.60799	0.00910745	0.158628
ENSG00000239405.1,TMED10P2,processed_pseudogene	2.59253	-1.4652	-3.64626	0.561981	-2.6072	0.00912869	0.15866
ENSG00000188277.9,C15orf62,protein_coding	3.50815	1.41283	2.16245	0.541864	2.60734	0.00912483	0.15866
ENSG00000182885.16,ADGRG3,protein_coding	19.0929	1.1794	1.60606	0.452492	2.60646	0.00914822	0.158896
ENSG00000170801.9,HTRA3,protein_coding	56.8469	1.08069	1.28888	0.41467	2.60614	0.00915678	0.158942
ENSG00000136689.18,IL1RN,protein_coding	44.523	1.00337	1.19351	0.385147	2.60515	0.00918328	0.159227
ENSG00000135537.16,LACE1,protein_coding	202.781	-0.441228	-0.450019	0.169386	-2.60486	0.00919112	0.159227
ENSG00000131669.9,NINJ1,protein_coding	339.992	0.662203	0.70467	0.254204	2.605	0.00918733	0.159227
ENSG00000109321.10,AREG,protein_coding	21.2952	1.38242	1.899	0.530804	2.60438	0.00920405	0.15927
ENSG00000196990.8,FAM163B,protein_coding	18.7098	-1.34832	-2.05459	0.517767	-2.6041	0.00921147	0.15927
ENSG00000018869.16,ZNF582,protein_coding	124.135	-0.518033	-0.533029	0.198927	-2.60413	0.00921066	0.15927
ENSG00000277916.1,uc_338,misc_RNA	3.04849	-1.45831	-3.17539	0.560392	-2.60231	0.00925982	0.159636
ENSG00000178568.13,ERBB4,protein_coding	893.41	-1.20672	-1.64782	0.463931	-2.60107	0.00929328	0.159636
ENSG00000241553.12,ARPC4,protein_coding	934.097	0.391174	0.399637	0.150334	2.60204	0.009267	0.159636
ENSG00000260918.1,RP11-731J8.2,sense_overlapping	509.667	-1.28421	-1.76014	0.493351	-2.60304	0.00923999	0.159636
ENSG00000124613.8,ZNF391,protein_coding	209.077	-0.57947	-0.604962	0.222753	-2.6014	0.00928437	0.159636
ENSG00000026297.15,RNASET2,protein_coding	911.005	0.627071	0.663179	0.241099	2.60089	0.00929833	0.159636
ENSG00000134955.11,SLC37A2,protein_coding	233.475	0.789122	0.852055	0.303363	2.60124	0.00928867	0.159636
ENSG00000256197.1,TSPAN9-IT1,sense_intronic	7.86086	1.09206	1.30289	0.419739	2.60177	0.00927443	0.159636
ENSG00000103375.10,AQP8,protein_coding	2.56234	-1.26843	-1.87042	0.487564	-2.60157	0.00927972	0.159636
ENSG00000158717.10,RNF166,protein_coding	374.556	0.504958	0.518321	0.19404	2.60234	0.00925891	0.159636
ENSG00000179761.11,PIPOX,protein_coding	381.091	-0.759525	-0.801804	0.291954	-2.60152	0.00928107	0.159636
ENSG00000262246.5,CORO7,protein_coding	608.878	0.581519	0.607579	0.22366	2.60001	0.00932215	0.159943
ENSG00000279202.1,CTA-113A6.1,TEC	10.3604	1.35529	2.23943	0.521321	2.59972	0.00933007	0.159976
ENSG00000261087.1,KB-1460A1.5,lincRNA	179.397	-0.778157	-0.845771	0.299381	-2.59922	0.00934357	0.160105
ENSG00000141682.11,PMAIP1,protein_coding	48.8654	1.19468	1.51049	0.459722	2.59871	0.00935742	0.160239
ENSG00000265055.1,AC145343.2,lincRNA	2.43886	1.43546	2.48534	0.55247	2.59825	0.00936997	0.160249
ENSG00000174403.15,C20orf166-AS1,antisense	25.0434	1.44684	2.60067	0.556822	2.59839	0.00936632	0.160249
ENSG00000159128.14,IFNGR2,protein_coding	578.017	0.569484	0.601152	0.219222	2.59775	0.0093836	0.160379
ENSG00000187098.14,MITF,protein_coding	274.32	0.705877	0.748737	0.271865	2.59642	0.00941996	0.160795
ENSG00000185862.6,EVI2B,protein_coding	228.872	0.820484	0.900782	0.315994	2.59652	0.00941745	0.160795
ENSG00000181016.9,LSMEM1,protein_coding	88.6975	-0.744413	-0.808257	0.286817	-2.59543	0.00944734	0.160949
ENSG00000107147.11,KCNT1,protein_coding	75.5663	-1.31917	-1.86718	0.508309	-2.59522	0.00945304	0.160949
ENSG00000153982.10,GDPD1,protein_coding	191.088	-0.709317	-0.775069	0.273298	-2.5954	0.00944806	0.160949
ENSG00000159905.14,ZNF221,protein_coding	337.703	-0.449274	-0.459848	0.173086	-2.59566	0.00944086	0.160949
ENSG00000095370.19,SH2D3C,protein_coding	135.856	0.751309	0.807288	0.289668	2.59369	0.00949512	0.161447
ENSG00000128000.15,ZNF780B,protein_coding	1999.52	-0.564496	-0.587708	0.217689	-2.59313	0.00951068	0.161447
ENSG00000130202.9,PVRL2,protein_coding	429.734	0.757557	0.830945	0.292116	2.59334	0.00950478	0.161447
ENSG00000172216.5,CEBPB,protein_coding	355.135	0.706902	0.762871	0.272613	2.59306	0.00951249	0.161447
ENSG00000254620.1,RP5-907D15.3,lincRNA	3.09417	-1.44418	-2.69342	0.55685	-2.59348	0.00950108	0.161447
ENSG00000111199.10,TRPV4,protein_coding	20.3725	0.84562	0.915903	0.32615	2.59273	0.00952173	0.161466
ENSG00000196557.10,CACNA1H,protein_coding	286.997	0.868197	0.960907	0.334877	2.59259	0.00952574	0.161466
ENSG00000087303.16,NID2,protein_coding	449.87	0.946245	1.04691	0.36507	2.59195	0.00954327	0.161661
ENSG00000224596.7,ZMIZ1-AS1,antisense	38.4261	0.967915	1.07279	0.373464	2.59172	0.00954969	0.161667
ENSG00000154162.13,CDH12,protein_coding	12.4072	-1.44617	-2.83604	0.558094	-2.59127	0.00956231	0.161676
ENSG00000176593.7,CTD-2368P22.1,processed_transcript	1657.61	-0.781057	-0.852378	0.301397	-2.59146	0.00955697	0.161676
ENSG00000160654.9,CD3G,protein_coding	9.84372	1.21055	1.48328	0.467321	2.59041	0.00958608	0.161976
ENSG00000164047.4,CAMP,protein_coding	2.26513	1.43971	3.31689	0.555966	2.58957	0.00960966	0.162271
ENSG00000171451.13,DSEL,protein_coding	4116.93	-0.702829	-0.743013	0.271477	-2.58891	0.00962801	0.162376
ENSG00000173198.5,CYSLTR1,protein_coding	28.8048	0.735738	0.793516	0.284179	2.589	0.00962564	0.162376
ENSG00000155629.14,PIK3AP1,protein_coding	379.786	0.769667	0.837106	0.297375	2.5882	0.00964782	0.162608
ENSG00000034510.5,TMSB10,protein_coding	3176.5	0.806224	0.8908	0.311566	2.58765	0.00966319	0.162764
ENSG00000112237.12,CCNC,protein_coding	542.237	-0.445279	-0.454383	0.172127	-2.58693	0.00968359	0.163005
ENSG00000234614.1,AL450992.2,antisense	9.41681	1.32066	1.90759	0.510571	2.58663	0.00969198	0.163044
ENSG00000173208.3,ABCD2,protein_coding	256.968	-0.82797	-0.899667	0.320158	-2.58613	0.00970602	0.163075
ENSG00000259362.2,RP11-307C19.1,lincRNA	20.9026	-1.05143	-1.26539	0.406536	-2.58631	0.00970092	0.163075
ENSG00000239305.6,RNF103,protein_coding	908.301	-0.28492	-0.287745	0.110197	-2.58554	0.00972263	0.163155
ENSG00000170074.19,FAM153A,protein_coding	21.8232	-1.35435	-1.91521	0.523821	-2.58553	0.00972302	0.163155
ENSG00000105341.18,ATP5SL,protein_coding	259.028	-0.45286	-0.463608	0.175257	-2.58397	0.00976695	0.163789
ENSG00000149294.16,NCAM1,protein_coding	7984.87	-0.567267	-0.595009	0.219586	-2.58334	0.00978485	0.163987
ENSG00000117091.9,CD48,protein_coding	32.7903	1.04088	1.2085	0.403133	2.58198	0.00982363	0.164116
ENSG00000251367.1,RP11-231G15.2,lincRNA	7.15511	-1.34495	-2.26415	0.520858	-2.58219	0.00981755	0.164116
ENSG00000122733.12,PHF24,protein_coding	128.867	-1.24778	-1.69511	0.483177	-2.58245	0.00981018	0.164116
ENSG00000136897.7,MRPL50,protein_coding	407.008	-0.426853	-0.436074	0.165307	-2.58218	0.0098177	0.164116
ENSG00000267160.1,RP11-1072C15.4,antisense	63.7674	-0.786028	-0.856968	0.304479	-2.58155	0.00983584	0.164116
ENSG00000184557.4,SOCS3,protein_coding	1451.1	0.923056	1.01862	0.357588	2.58134	0.00984165	0.164116
ENSG00000101197.12,BIRC7,protein_coding	5.4633	1.41541	2.31737	0.548172	2.58206	0.00982126	0.164116
ENSG00000086712.12,TXLNG,protein_coding	522.792	-0.393864	-0.39897	0.15258	-2.58136	0.00984119	0.164116
ENSG00000182795.12,C1orf116,protein_coding	12.8379	-0.953636	-1.11952	0.369499	-2.58089	0.0098546	0.164229
ENSG00000229321.1,AC008269.2,lincRNA	13.0143	-1.13783	-1.40828	0.441065	-2.57972	0.00988792	0.164529
ENSG00000175471.19,MCTP1,protein_coding	220.318	1.04764	1.20064	0.40617	2.57932	0.00989942	0.164529
ENSG00000136250.11,AOAH,protein_coding	155.791	0.906481	1.01415	0.351457	2.57921	0.00990272	0.164529
ENSG00000118971.7,CCND2,protein_coding	18823.5	-1.05015	-1.27271	0.407175	-2.57911	0.00990559	0.164529
ENSG00000121377.2,TAS2R7,protein_coding	9.55198	-1.18556	-1.54134	0.459734	-2.5788	0.00991441	0.164529
ENSG00000197165.10,SULT1A2,protein_coding	6.47292	-1.24787	-1.65461	0.483904	-2.57876	0.00991568	0.164529
ENSG00000168748.13,CA7,protein_coding	3.83733	-1.44933	-2.43666	0.561925	-2.57922	0.00990225	0.164529
ENSG00000273381.1,RP11-305L7.7,lincRNA	70.9385	-1.02698	-1.22261	0.398321	-2.57826	0.00992998	0.164664
ENSG00000090060.17,PAPOLA,protein_coding	3785.96	-0.340119	-0.344667	0.131948	-2.57767	0.00994681	0.164841
ENSG00000240864.3,IGKV1-16,IG_V_gene	4.49627	1.42386	2.88986	0.552441	2.57739	0.00995498	0.164874
ENSG00000204556.4,CTD-2514C3.1,unprocessed_pseudogene	9.64961	-1.20948	-1.75103	0.469457	-2.57634	0.00998517	0.165272
ENSG00000167359.8,OR51I1,protein_coding	5.12996	-1.23826	-1.66318	0.480672	-2.57611	0.00999192	0.165281
ENSG00000099992.15,TBC1D10A,protein_coding	264.669	0.690867	0.741394	0.268221	2.57574	0.0100027	0.165357
ENSG00000142632.16,ARHGEF19,protein_coding	37.1608	0.732128	0.776301	0.28433	2.57492	0.0100263	0.165403
ENSG00000260460.1,RP11-284F21.8,lincRNA	8.29129	1.36417	1.80101	0.529823	2.57476	0.0100308	0.165403
ENSG00000240677.1,MYL6P4,processed_pseudogene	25.1092	-1.20896	-1.5602	0.469497	-2.57502	0.0100234	0.165403
ENSG00000104442.9,ARMC1,protein_coding	637.153	-0.362545	-0.368117	0.140824	-2.57445	0.01004	0.165403
ENSG00000269416.5,LINC01224,lincRNA	34.8933	-1.09248	-1.38016	0.424371	-2.57436	0.0100426	0.165403
ENSG00000120280.5,CXorf21,protein_coding	42.2905	0.792329	0.88039	0.307682	2.57516	0.0100195	0.165403
ENSG00000164172.18,MOCS2,protein_coding	596.462	-0.434318	-0.444739	0.168783	-2.57323	0.0100755	0.165741
ENSG00000271913.5,RP1-111C20.4,antisense	27.6589	-0.837503	-0.927091	0.325453	-2.57335	0.010072	0.165741
ENSG00000198429.9,ZNF69,protein_coding	310.772	-0.718112	-0.767919	0.279225	-2.57181	0.0101168	0.166216
ENSG00000205927.4,OLIG2,protein_coding	967.706	-0.862856	-0.966425	0.335497	-2.57187	0.010115	0.166216
ENSG00000143013.12,LMO4,protein_coding	1579.8	-0.491328	-0.507883	0.191092	-2.57115	0.010136	0.166225
ENSG00000112576.12,CCND3,protein_coding	463.846	0.711599	0.772259	0.27675	2.57127	0.0101328	0.166225
ENSG00000104888.9,SLC17A7,protein_coding	136.602	-1.33844	-2.04052	0.520498	-2.57146	0.0101272	0.166225
ENSG00000111961.16,SASH1,protein_coding	1866.74	-0.584101	-0.603524	0.227221	-2.57063	0.0101514	0.166273
ENSG00000132932.16,ATP8A2,protein_coding	144.899	-1.27657	-1.84884	0.496562	-2.57082	0.0101458	0.166273
ENSG00000086730.16,LAT2,protein_coding	215.053	0.613986	0.649504	0.23891	2.56994	0.0101716	0.166501
ENSG00000203747.9,FCGR3A,protein_coding	1360.6	0.884825	0.988477	0.344484	2.56855	0.0102124	0.166558
ENSG00000225953.2,SATB2-AS1,antisense	12.5429	-1.16755	-1.58927	0.454396	-2.56946	0.0101856	0.166558
ENSG00000114757.18,PEX5L,protein_coding	456.108	-1.31593	-1.93159	0.512297	-2.56868	0.0102087	0.166558
ENSG00000095539.15,SEMA4G,protein_coding	87.9113	-0.576619	-0.602014	0.224465	-2.56886	0.0102032	0.166558
ENSG00000174206.12,C12orf66,protein_coding	287.823	-0.478919	-0.493646	0.186403	-2.56927	0.0101913	0.166558
ENSG00000141424.12,SLC39A6,protein_coding	1291.49	-0.551442	-0.5701	0.214685	-2.56861	0.0102107	0.166558
ENSG00000113303.11,BTNL8,protein_coding	2.91524	-1.37497	-2.04568	0.535542	-2.56744	0.0102453	0.166891
ENSG00000260625.2,RP11-452L6.7,antisense	7.75202	-1.15366	-1.46709	0.44933	-2.56751	0.0102431	0.166891
ENSG00000266970.1,RP11-806H10.4,lincRNA	8.07735	1.13535	1.37508	0.44225	2.56722	0.0102517	0.166892
ENSG00000113749.6,HRH2,protein_coding	44.6792	0.939891	1.06101	0.366267	2.56614	0.0102838	0.167314
ENSG00000270435.1,RP11-304C12.4,processed_pseudogene	3.5439	1.40192	1.31239	0.546443	2.56553	0.0103018	0.167505
ENSG00000169085.11,C8orf46,protein_coding	635.038	-0.887602	-1.00244	0.346113	-2.56449	0.0103328	0.167907
ENSG00000159593.14,NAE1,protein_coding	579.899	-0.399582	-0.405626	0.155842	-2.56402	0.0103468	0.168032
ENSG00000119900.7,OGFRL1,protein_coding	4957.89	-0.776333	-0.837516	0.302905	-2.56296	0.0103785	0.168268
ENSG00000175544.13,CABP4,protein_coding	88.5383	0.859153	0.948041	0.335226	2.56291	0.01038	0.168268
ENSG00000280153.1,RP11-876N24.3,TEC	175.288	0.965527	1.10867	0.376732	2.5629	0.0103803	0.168268
ENSG00000204588.5,LINC01123,lincRNA	21.7006	-1.26119	-1.68355	0.492348	-2.56159	0.0104195	0.168745
ENSG00000223707.2,SFR1P2,processed_pseudogene	2.24743	-1.44081	-3.21885	0.56249	-2.56149	0.0104223	0.168745
ENSG00000160447.6,PKN3,protein_coding	98.6726	0.782672	0.858232	0.305585	2.56123	0.0104303	0.168773
ENSG00000162591.15,MEGF6,protein_coding	231.75	-1.23486	-1.83951	0.482413	-2.55977	0.0104743	0.169381
ENSG00000104760.16,FGL1,protein_coding	13.9426	1.38884	2.49693	0.542719	2.55904	0.0104963	0.169532
ENSG00000268357.1,VN1R81P,unprocessed_pseudogene	40.3398	-0.862812	-0.950581	0.337159	-2.55907	0.0104954	0.169532
ENSG00000243649.8,CFB,protein_coding	171.358	0.972674	1.10223	0.380128	2.55881	0.0105032	0.169541
ENSG00000116237.15,ICMT,protein_coding	882.39	0.580098	0.609373	0.226763	2.55817	0.0105224	0.169588
ENSG00000272942.1,CTA-246H3.12,lincRNA	9.66379	-1.24778	-1.7389	0.487766	-2.55816	0.0105228	0.169588
ENSG00000130830.14,MPP1,protein_coding	341.114	0.53759	0.557985	0.210153	2.55808	0.0105251	0.169588
ENSG00000110324.9,IL10RA,protein_coding	564.86	0.858175	0.949134	0.335769	2.55585	0.0105928	0.170576
ENSG00000142875.19,PRKACB,protein_coding	2160.09	-0.548479	-0.566277	0.214676	-2.55491	0.0106216	0.170732
ENSG00000058085.14,LAMC2,protein_coding	16.4402	1.20516	1.66204	0.471733	2.55475	0.0106264	0.170732
ENSG00000227455.2,RP11-300M24.1,lincRNA	15.8388	-1.28727	-1.8862	0.503862	-2.5548	0.0106249	0.170732
ENSG00000235001.3,EIF4A1P2,processed_pseudogene	2.71725	1.40983	2.58818	0.551857	2.5547	0.010628	0.170732
ENSG00000117122.13,MFAP2,protein_coding	46.2982	1.2179	1.5888	0.476814	2.55424	0.0106419	0.170852
ENSG00000198417.6,MT1F,protein_coding	81.3351	-0.989673	-1.26333	0.387588	-2.55342	0.0106672	0.17095
ENSG00000259207.7,ITGB3,protein_coding	387.664	0.992122	1.14348	0.388494	2.55376	0.0106566	0.17095
ENSG00000131355.14,ADGRE3,protein_coding	4.36169	1.35201	2.35644	0.529466	2.55353	0.0106637	0.17095
ENSG00000120889.12,TNFRSF10B,protein_coding	869.092	0.739417	0.799943	0.28966	2.55271	0.0106889	0.171195
ENSG00000175505.10,CLCF1,protein_coding	145.359	0.966402	1.12513	0.378708	2.55184	0.0107157	0.171419
ENSG00000105197.10,TIMM50,protein_coding	642.486	-0.422181	-0.432581	0.165436	-2.55193	0.0107127	0.171419
ENSG00000197951.8,ZNF71,protein_coding	525.44	-0.523868	-0.542188	0.205349	-2.55111	0.0107382	0.171676
ENSG00000153904.18,DDAH1,protein_coding	2042.81	-0.607181	-0.634697	0.23809	-2.55022	0.0107655	0.171805
ENSG00000272755.1,RP11-326G21.1,lincRNA	25.8364	-1.11473	-1.37049	0.437073	-2.55045	0.0107585	0.171805
ENSG00000211772.9,TRBC2,TR_C_gene	17.0043	1.31496	1.76978	0.515595	2.55037	0.0107609	0.171805
ENSG00000148344.10,PTGES,protein_coding	33.0659	1.12354	1.32084	0.440614	2.54993	0.0107745	0.171845
ENSG00000211895.4,IGHA1,IG_C_gene	367.491	1.43492	2.06079	0.56294	2.54898	0.0108037	0.172209
ENSG00000187068.2,C3orf70,protein_coding	2100.8	-0.82796	-0.904923	0.324884	-2.54848	0.0108195	0.172268
ENSG00000112320.11,SOBP,protein_coding	946.399	-0.619677	-0.648011	0.243159	-2.54845	0.0108203	0.172268
ENSG00000122417.15,ODF2L,protein_coding	694.438	0.63216	0.66065	0.248198	2.547	0.0108653	0.17253
ENSG00000233757.6,AC092835.2,protein_coding	197.447	-0.497396	-0.515782	0.1953	-2.54683	0.0108705	0.17253
ENSG00000069018.17,TRPC7,protein_coding	3.94218	1.4296	3.12847	0.561404	2.54647	0.010882	0.17253
ENSG00000170419.10,VSTM2A,protein_coding	217.511	1.41058	2.26965	0.553908	2.5466	0.0108777	0.17253
ENSG00000282885.1,RP11-596C23.6,lincRNA	5.80111	-1.24537	-1.5913	0.489036	-2.54659	0.010878	0.17253
ENSG00000140105.17,WARS,protein_coding	1442.85	0.795865	0.863269	0.312497	2.54679	0.0108718	0.17253
ENSG00000254521.6,SIGLEC12,protein_coding	4.02757	1.42858	2.47493	0.56097	2.54663	0.010877	0.17253
ENSG00000170464.9,DNAJC18,protein_coding	640.012	-0.37365	-0.38026	0.146777	-2.54569	0.0109061	0.172708
ENSG00000234772.1,LINC00412,antisense	15.6221	-1.10945	-1.36586	0.435798	-2.54578	0.0109033	0.172708
ENSG00000276180.1,HIST1H4I,protein_coding	24.6836	1.29835	1.83071	0.510241	2.54457	0.0109411	0.17316
ENSG00000154783.10,FGD5,protein_coding	208.101	0.725313	0.774223	0.285104	2.54403	0.0109581	0.173249
ENSG00000174130.12,TLR6,protein_coding	272.137	0.76507	0.830222	0.300737	2.54398	0.0109597	0.173249
ENSG00000276417.1,RP11-266K4.13,lincRNA	372.393	-0.790072	-0.874837	0.310631	-2.54344	0.0109766	0.173413
ENSG00000147813.15,NAPRT,protein_coding	171.091	0.684928	0.731084	0.269317	2.5432	0.0109841	0.17343
ENSG00000136280.15,CCM2,protein_coding	595.319	0.428787	0.438401	0.168719	2.54144	0.0110398	0.174207
ENSG00000084112.14,SSH1,protein_coding	1594.07	0.365153	0.371225	0.14376	2.54002	0.0110848	0.174812
ENSG00000174004.5,NRROS,protein_coding	58.6366	0.924137	1.07076	0.363908	2.53948	0.0111018	0.174874
ENSG00000272686.1,RP11-390E23.6,antisense	134.721	-0.771628	-0.838993	0.303834	-2.53963	0.0110969	0.174874
ENSG00000140030.5,GPR65,protein_coding	154.036	0.737495	0.802792	0.290509	2.53863	0.0111286	0.175194
ENSG00000240668.1,KRT8P36,processed_pseudogene	7.03739	1.23243	1.53308	0.485543	2.53825	0.0111407	0.175234
ENSG00000128973.11,CLN6,protein_coding	348.385	0.49918	0.513504	0.196671	2.53814	0.0111443	0.175234
ENSG00000257181.1,RP11-611O2.5,antisense	47.6667	1.29368	1.76528	0.509919	2.53703	0.0111799	0.175587
ENSG00000124107.5,SLPI,protein_coding	25.5407	1.19558	1.63913	0.471236	2.5371	0.0111774	0.175587
ENSG00000205045.8,SLFN12L,protein_coding	35.0378	1.17863	1.46455	0.464615	2.53678	0.0111876	0.175605
ENSG00000087258.13,GNAO1,protein_coding	1894.39	-0.807147	-0.896883	0.318221	-2.53644	0.0111987	0.175676
ENSG00000105270.14,CLIP3,protein_coding	2098.9	-0.62867	-0.663204	0.247973	-2.53523	0.0112372	0.176177
ENSG00000154767.14,XPC,protein_coding	687.188	0.429608	0.441635	0.169482	2.53482	0.0112505	0.176178
ENSG00000168792.4,ABHD15,protein_coding	186.559	0.578728	0.607166	0.22831	2.53483	0.0112501	0.176178
ENSG00000143196.4,DPT,protein_coding	4.22048	1.40952	2.3132	0.556372	2.53342	0.0112955	0.176779
ENSG00000189056.13,RELN,protein_coding	55.3565	-1.26209	-1.81949	0.498327	-2.53265	0.0113205	0.176964
ENSG00000180921.6,FAM83H,protein_coding	74.7988	0.967072	1.12768	0.381839	2.53267	0.0113198	0.176964
ENSG00000159214.12,CCDC24,protein_coding	128.737	0.578243	0.604826	0.228382	2.53191	0.0113442	0.176979
ENSG00000118200.14,CAMSAP2,protein_coding	3091.76	-0.391145	-0.397658	0.154494	-2.53177	0.0113487	0.176979
ENSG00000054219.10,LY75,protein_coding	207.577	0.914277	1.06183	0.361176	2.53139	0.0113612	0.176979
ENSG00000272077.1,RP11-348P10.2,lincRNA	196.771	-0.67449	-0.723515	0.266374	-2.53211	0.0113378	0.176979
ENSG00000138696.10,BMPR1B,protein_coding	803.466	-0.85818	-0.951562	0.338964	-2.53177	0.0113488	0.176979
ENSG00000111713.2,GYS2,protein_coding	4.79468	-1.17857	-1.57692	0.465581	-2.5314	0.011361	0.176979
ENSG00000230650.1,AC112229.1,processed_pseudogene	2.3935	1.40784	2.72614	0.556229	2.53104	0.0113725	0.177052
ENSG00000272829.1,XXbac-B135H6.18,lincRNA	3.26587	-1.41773	-2.73067	0.560334	-2.53015	0.0114014	0.177399
ENSG00000131848.9,ZSCAN5A,protein_coding	205.887	-0.57767	-0.611489	0.228342	-2.52984	0.0114114	0.177451
ENSG00000153563.15,CD8A,protein_coding	19.9099	1.12169	1.39247	0.443466	2.52937	0.0114267	0.177586
ENSG00000232671.5,RP11-126K1.2,antisense	6.87744	1.1731	1.52207	0.463926	2.52863	0.0114509	0.177652
ENSG00000185008.17,ROBO2,protein_coding	1929.71	-0.964625	-1.08981	0.381428	-2.52899	0.0114393	0.177652
ENSG00000257703.5,RP11-328J6.1,lincRNA	2.61262	-1.35781	-2.26021	0.536931	-2.52883	0.0114443	0.177652
ENSG00000128917.6,DLL4,protein_coding	134.998	0.824123	0.906311	0.32597	2.52821	0.0114644	0.177759
ENSG00000085491.15,SLC25A24,protein_coding	351.46	0.668411	0.715851	0.264435	2.52769	0.0114815	0.17781
ENSG00000184500.14,PROS1,protein_coding	694.578	0.737013	0.800777	0.291597	2.5275	0.0114877	0.17781
ENSG00000257511.1,RP11-278C7.1,processed_pseudogene	44.6778	-0.704893	-0.762791	0.278848	-2.52787	0.0114755	0.17781
ENSG00000105649.9,RAB3A,protein_coding	93.4949	-0.83849	-0.937742	0.331803	-2.52707	0.0115017	0.177924
ENSG00000117090.14,SLAMF1,protein_coding	7.89857	1.3469	1.94257	0.533121	2.52645	0.0115223	0.178042
ENSG00000099204.18,ABLIM1,protein_coding	2383.02	-0.624644	-0.65333	0.247267	-2.52619	0.0115307	0.178042
ENSG00000150782.11,IL18,protein_coding	181.635	1.00253	1.1699	0.396914	2.52583	0.0115426	0.178042
ENSG00000053770.11,AP5M1,protein_coding	1317.98	-0.420119	-0.429231	0.166326	-2.52588	0.0115408	0.178042
ENSG00000154237.12,LRRK1,protein_coding	425.703	0.750155	0.806862	0.296958	2.52613	0.0115326	0.178042
ENSG00000187699.10,C2orf88,protein_coding	425.287	-0.984128	-1.22455	0.38976	-2.52496	0.0115712	0.178276
ENSG00000278627.1,RP11-506H21.5,antisense	22.986	-0.991246	-1.16219	0.392556	-2.52511	0.0115664	0.178276
ENSG00000198948.11,MFAP3L,protein_coding	1262.23	-0.631296	-0.671259	0.250099	-2.52418	0.0115969	0.178331
ENSG00000260645.1,RP11-250B2.5,lincRNA	159.895	-0.952338	-1.07837	0.377341	-2.52381	0.011609	0.178331
ENSG00000258499.1,RP11-862G15.2,lincRNA	3.61331	-1.32619	-1.94608	0.525507	-2.52364	0.0116148	0.178331
ENSG00000140968.10,IRF8,protein_coding	204.541	0.748521	0.81113	0.296566	2.52396	0.011604	0.178331
ENSG00000101162.3,TUBB1,protein_coding	18.5749	1.33804	2.0139	0.530005	2.52459	0.0115834	0.178331
ENSG00000169239.12,CA5B,protein_coding	409.202	-0.521035	-0.532607	0.206437	-2.52395	0.0116046	0.178331
ENSG00000137767.13,SQRDL,protein_coding	94.2669	0.91953	1.05372	0.36451	2.52265	0.0116475	0.178731
ENSG00000132623.15,ANKEF1,protein_coding	39.4164	1.1813	1.4855	0.468326	2.52239	0.0116561	0.178761
ENSG00000234773.6,CTD-2666L21.1,lincRNA	88.4098	-0.751761	-0.814935	0.298073	-2.52207	0.0116667	0.178821
ENSG00000163399.15,ATP1A1,protein_coding	3481.83	0.71842	0.782868	0.284925	2.52143	0.0116878	0.178939
ENSG00000256940.1,RP11-783K16.5,antisense	5.61243	1.23896	1.79286	0.491351	2.52154	0.0116843	0.178939
ENSG00000121900.18,TMEM54,protein_coding	149.558	0.728869	0.788078	0.289329	2.51917	0.0117633	0.178959
ENSG00000272667.1,RP11-395A13.2,lincRNA	50.1047	-0.605317	-0.646353	0.240238	-2.51965	0.011747	0.178959
ENSG00000002549.12,LAP3,protein_coding	928.598	0.689042	0.75294	0.27345	2.51981	0.0117418	0.178959
ENSG00000187372.11,PCDHB13,protein_coding	1123.32	-0.790007	-0.880214	0.313641	-2.51883	0.0117747	0.178959
ENSG00000086288.11,NME8,protein_coding	4.94807	1.3238	2.16609	0.525523	2.51902	0.0117683	0.178959
ENSG00000253516.1,HMGB1P41,processed_pseudogene	22.7983	-0.831779	-0.925486	0.330231	-2.51878	0.0117762	0.178959
ENSG00000164756.12,SLC30A8,protein_coding	19.4364	1.16144	5.40929	0.460685	2.52112	0.0116982	0.178959
ENSG00000203876.9,ADD3-AS1,processed_transcript	42.8951	-0.973023	-1.12852	0.386111	-2.52006	0.0117335	0.178959
ENSG00000166105.15,GLB1L3,protein_coding	44.7182	1.1829	1.46249	0.469593	2.51898	0.0117695	0.178959
ENSG00000274797.1,RP11-407N8.5,antisense	9.14844	-1.14079	-1.50266	0.452874	-2.519	0.0117689	0.178959
ENSG00000198535.5,C2CD4A,protein_coding	22.2589	-1.41792	-2.44181	0.562777	-2.51951	0.011752	0.178959
ENSG00000197782.14,ZNF780A,protein_coding	810.67	-0.458869	-0.470194	0.182179	-2.51879	0.011776	0.178959
ENSG00000268568.1,AC007228.9,lincRNA	18.6498	-1.02473	-1.21408	0.406639	-2.52001	0.0117353	0.178959
ENSG00000174059.16,CD34,protein_coding	423.877	0.783724	0.856854	0.311269	2.51784	0.0118077	0.179066
ENSG00000114316.12,USP4,protein_coding	1255.99	0.279655	0.282195	0.111056	2.51814	0.0117975	0.179066
ENSG00000233705.6,SLC26A4-AS1,antisense	14.4698	-1.38452	-2.29943	0.549898	-2.51777	0.01181	0.179066
ENSG00000136305.11,CIDEB,protein_coding	44.1275	0.936227	1.06364	0.37177	2.51829	0.0117925	0.179066
ENSG00000204860.4,FAM201A,antisense	11.5108	1.41041	3.1505	0.560237	2.51753	0.011818	0.179086
ENSG00000260360.1,RP11-533E19.5,lincRNA	6.96411	-1.20375	-1.6862	0.478358	-2.51643	0.0118552	0.179516
ENSG00000198625.12,MDM4,protein_coding	6788.24	0.835982	0.917605	0.332228	2.51629	0.0118598	0.179516
ENSG00000055732.12,MCOLN3,protein_coding	36.8385	1.29574	1.87484	0.515052	2.51574	0.0118783	0.179634
[truncated: 58,787 more rows]

## Sheet: S1c
GBM DE genes Classical vs Proneural
[truncated: 60,555 more rows]

## Sheet: S1d
Classification of tumor samples based on the RNA-Seq results into the three TCGA molecular subtypes (according to the GlioVis algorithms KNN, SVM and ssGSEA and classification according to the IGS clusters
[truncated: 126 more rows]

[truncated: 2 more sheets: S1e, S1f]
